# Supplementary material for: Integrated Analysis of LncRNA-mRNA Coexpression in the Extracellular Matrix of Developing Deciduous Teeth in Miniature Pigs
Source: Biomed Res Int. 2019 Jan 23;2019:6159490. doi: 10.1155/2019/6159490 (PMC6364112; doi:10.1155/2019/6159490)
Supplement: Supplementary Materials — Supplementary Table 1: the identified differentially expressed genes during the deciduous tooth germ transition from the cap stage to bell stage (E40 to E50) (XLS 100 kb). Supplementary Table 2: the identified differentially expressed genes during the deciduous tooth germ transition from the early bell stage to late bell stage (E50 to E60) (XLS 71kb). Supplementary Table 3: the identified differentially expressed lncRNAs during the deciduous tooth germ transition from the cap stage to the early bell stage (E40 to E50) (XLS 211kb). Supplementary Table 4: the identified differentially expressed lncRNAs during the deciduous tooth germ transition from the early bell stage to the late bell stage (E50 to E60) (XLS 626 kb). Supplementary Table 5: the significantly enriched KEGG pathways associated with the grouped DEGs (XLS 169kb). Supplementary Table 6: the expression changes of the ECM pathway genes from E40 to E50 and from E50 to E60 (XLS 11kb). Supplementary Table 7: the miRNA-target lncRNA and mRNA regulatory interactions of the ECM pathway (XLS 27kb). Supplementary Table 8: lncRNA and mRNA colocation analysis of the ECM pathway genes (XLS 30kb). Supplementary Figures: the developmental morphology of tooth germs at key development stages E40, E50, and E60 (Supplementary Figure 1). The coexpressed analysis of ECM genes and lncRNAs (Supplementary Figure 2) (DOCX 15mb). [file 6159490.f1.zip]

Archive with 24 entries (21 files):
- Supplementary materials/
- Supplementary materials/.DS_Store
- __MACOSX/
- __MACOSX/Supplementary materials/
- __MACOSX/Supplementary materials/._.DS_Store
- Supplementary materials/Supplementary Figures.docx
- __MACOSX/Supplementary materials/._Supplementary Figures.docx
- Supplementary materials/Supplementary  Table 2.xls
- __MACOSX/Supplementary materials/._Supplementary  Table 2.xls
- Supplementary materials/Supplementary Table 1.xls
- __MACOSX/Supplementary materials/._Supplementary Table 1.xls
- Supplementary materials/Supplementary Table 3.xls
- __MACOSX/Supplementary materials/._Supplementary Table 3.xls
- Supplementary materials/ Supplementary Table 8.xlt
- __MACOSX/Supplementary materials/._ Supplementary Table 8.xlt
- Supplementary materials/Supplementary Table 6.xls
- __MACOSX/Supplementary materials/._Supplementary Table 6.xls
- Supplementary materials/Supplementary Table 7.xls
- __MACOSX/Supplementary materials/._Supplementary Table 7.xls
- Supplementary materials/Supplementary Table 5.xls
- __MACOSX/Supplementary materials/._Supplementary Table 5.xls
- Supplementary materials/Supplementary Table 4.xls
- __MACOSX/Supplementary materials/._Supplementary Table 4.xls
- __MACOSX/._Supplementary materials
