# Supplementary material for: Integrated Analysis of LncRNA-mRNA Coexpression in the Extracellular Matrix of Developing Deciduous Teeth in Miniature Pigs
Source: Biomed Res Int. 2019 Jan 23;2019:6159490. doi: 10.1155/2019/6159490 (PMC6364112; doi:10.1155/2019/6159490)
Supplement: Supplementary Materials — Supplementary Table 1: the identified differentially expressed genes during the deciduous tooth germ transition from the cap stage to bell stage (E40 to E50) (XLS 100 kb). Supplementary Table 2: the identified differentially expressed genes during the deciduous tooth germ transition from the early bell stage to late bell stage (E50 to E60) (XLS 71kb). Supplementary Table 3: the identified differentially expressed lncRNAs during the deciduous tooth germ transition from the cap stage to the early bell stage (E40 to E50) (XLS 211kb). Supplementary Table 4: the identified differentially expressed lncRNAs during the deciduous tooth germ transition from the early bell stage to the late bell stage (E50 to E60) (XLS 626 kb). Supplementary Table 5: the significantly enriched KEGG pathways associated with the grouped DEGs (XLS 169kb). Supplementary Table 6: the expression changes of the ECM pathway genes from E40 to E50 and from E50 to E60 (XLS 11kb). Supplementary Table 7: the miRNA-target lncRNA and mRNA regulatory interactions of the ECM pathway (XLS 27kb). Supplementary Table 8: lncRNA and mRNA colocation analysis of the ECM pathway genes (XLS 30kb). Supplementary Figures: the developmental morphology of tooth germs at key development stages E40, E50, and E60 (Supplementary Figure 1). The coexpressed analysis of ECM genes and lncRNAs (Supplementary Figure 2) (DOCX 15mb). [file 6159490.f1.zip › Supplementary materials/ Supplementary Table 8.xlt]

## Sheet: lncRNA_location_liyang
LncAccID	LncName	Location	LncGeneType	mRNA_AccID	mRNA_Symbol	mRNA_Description	UpStream_GeneName	UpStream_GeneDescription	Distance_To_UpGene	DownStream_GeneName	DownStream_GeneDescription	Distance_To_DownGene
	LncAccID
XR_001308614.1	LOC102158440	chr4:142754858-142759203	lncRNA
XR_001299031.1	LOC102162348	chr9:122515407-122516672	lncRNA
XR_303627.2	LOC102167179	chr5:93649448-93656255	ncRNA
XR_001300047.1	LOC102165527	chr12:60594587-60611538	lncRNA
XR_001307078.1	LOC102165705	chr2:94030342-94207779	lncRNA							EDIL3	EGF-like repeats and discoidin I-like domains 3	299
XR_001299030.1	LOC102162483	chr9:122723392-122751980	lncRNA
XR_001301119.1	LOC102166772	chr14:110908911-110939840	lncRNA				LOC106506093		5599
XR_303148.2	LOC102166257	chr4:109080761-109085331	ncRNA
XR_305590.2	LOC102164777	chr9:90045821-90112021	ncRNA
XR_001309303.1	LOC102161185	chr6:87863798-87887728	lncRNA
XR_303685.1	LOC102161136	chr6:2827414-2828736	ncRNA
XR_001300999.1	LOC102157648	chr14:80027816-80028919	lncRNA
XR_001302545.1	LOC102161742	chr1:209730668-209739489	lncRNA
XR_001300048.1	LOC102165412	chr12:60641369-60644648	lncRNA
XR_001298949.1	LOC102164680	chr9:81395830-81458214	lncRNA				COL1A2	collagen, type I, alpha 2	2712	CASD1	CAS1 domain containing 1	3741
	LOC101159785
XR_304855.2	LOC100516145	chr8:49325352-49348295	ncRNA
