# Supplementary material for: Integrated Analysis of LncRNA-mRNA Coexpression in the Extracellular Matrix of Developing Deciduous Teeth in Miniature Pigs
Source: Biomed Res Int. 2019 Jan 23;2019:6159490. doi: 10.1155/2019/6159490 (PMC6364112; doi:10.1155/2019/6159490)
Supplement: Supplementary Materials — Supplementary Table 1: the identified differentially expressed genes during the deciduous tooth germ transition from the cap stage to bell stage (E40 to E50) (XLS 100 kb). Supplementary Table 2: the identified differentially expressed genes during the deciduous tooth germ transition from the early bell stage to late bell stage (E50 to E60) (XLS 71kb). Supplementary Table 3: the identified differentially expressed lncRNAs during the deciduous tooth germ transition from the cap stage to the early bell stage (E40 to E50) (XLS 211kb). Supplementary Table 4: the identified differentially expressed lncRNAs during the deciduous tooth germ transition from the early bell stage to the late bell stage (E50 to E60) (XLS 626 kb). Supplementary Table 5: the significantly enriched KEGG pathways associated with the grouped DEGs (XLS 169kb). Supplementary Table 6: the expression changes of the ECM pathway genes from E40 to E50 and from E50 to E60 (XLS 11kb). Supplementary Table 7: the miRNA-target lncRNA and mRNA regulatory interactions of the ECM pathway (XLS 27kb). Supplementary Table 8: lncRNA and mRNA colocation analysis of the ECM pathway genes (XLS 30kb). Supplementary Figures: the developmental morphology of tooth germs at key development stages E40, E50, and E60 (Supplementary Figure 1). The coexpressed analysis of ECM genes and lncRNAs (Supplementary Figure 2) (DOCX 15mb). [file 6159490.f1.zip › Supplementary materials/Supplementary Table 1.xls]

DEGs	Log2Foldchange	pvalue
EGR4	6.01	1.19E-05
BBS1	5.93	6.80E-04
NPAS4	6.22	1.18E-06
GATA4	6.29	3.80E-05
TRIM6	6.52	9.83E-07
RLIM	6.61	1.12E-04
LRRC52	6.84	7.13E-06
PLAGL2	6.82	3.70E-05
KCNJ1	6.8	8.69E-05
PTPRH	6.73	2.91E-05
BARHL2	6.97	6.64E-06
TBR1	6.69	3.73E-04
CLEC7A	6.66	1.25E-04
VSTM2B	7.01	7.72E-05
SLC5A8	6.88	1.07E-04
F7	7.07	7.13E-07
4-Mar	6.9	1.50E-04
CSF3	7.2	5.81E-06
SLC22A13	7.17	6.58E-06
CTSF	7.14	1.19E-05
TTLL7	7.23	8.47E-05
LEP	7.21	5.48E-05
AKR1E2	7.25	6.76E-05
SERPINA4	7.28	3.33E-05
FAM170B	7.15	2.28E-05
FCRLB	7.3	6.28E-07
DSCAML1	7.21	2.61E-05
CHRNA9	7.42	3.77E-08
KIAA2022	7.49	1.08E-04
SYN3	7.36	1.93E-04
AQP6	7.44	5.80E-07
IL28B	7.49	7.37E-05
GJB1	7.55	4.82E-06
GPR26	7.19	1.11E-03
KRT82	7.51	4.81E-05
GPR158	6.67	4.40E-04
ONECUT1	7.64	7.08E-06
ASIC2	7.48	6.80E-05
CXHXorf48	7.71	4.43E-06
SLAMF7	7.36	8.40E-05
ADAM5	7.67	1.59E-04
NOX5	7.34	8.04E-04
CHRNA5	7.71	3.23E-08
DDO	7.66	5.16E-07
C15H2orf66	7.75	2.01E-05
LHFPL4	7.71	4.91E-06
AVPR2	7.6	3.66E-05
DLK1	7.72	1.20E-04
ATP8B4	7.74	1.40E-04
GLDN	6.72	6.02E-04
DARC	7.7	1.70E-05
ABCA8	7.23	2.65E-05
LHX2	7.61	1.31E-04
IL20	8.03	3.76E-06
DRC1	7.8	3.87E-04
PRR22	8.02	2.76E-08
CART	7.98	4.38E-07
SLC13A3	6.6	8.22E-06
GALR3	8.07	6.46E-06
UHRF2	8.07	5.50E-05
OPTC	7.95	4.54E-04
TBX19	8.09	5.43E-05
NLRP12	6.34	1.10E-03
ASAH2B	8.08	2.20E-05
LINGO3	6.9	2.19E-04
IQCF1	8.1	9.94E-05
IL2RB	8.2	9.62E-06
C3H2orf70	8.12	4.09E-07
ENTHD1	8.04	5.91E-05
SFTA2	8.19	5.17E-05
FMO3	6.48	1.65E-03
AQP5	8.17	2.10E-05
CD300C	8.01	5.85E-05
GABRQ	7.64	4.21E-04
VTN	8.24	9.79E-06
PTI	7.92	7.66E-04
TRIM58	8.26	5.01E-05
MEP1A	6.51	9.90E-04
ONECUT2	8.06	8.11E-05
POU4F1	8.32	2.88E-05
ERP27	8.05	5.78E-05
CCDC172	8.19	4.04E-04
HS3ST4	8.38	3.70E-05
VNN2	8.4	5.97E-06
PRDM13	6.22	1.04E-05
C6H1orf87	7.19	4.87E-04
PCD1E	7.15	3.45E-04
TRIM63	8.28	8.79E-05
GLIPR1L2	8.06	1.13E-03
C17H20orf202	6.5	9.97E-07
TMEM202	8.35	3.06E-05
DNMT3L	8.48	1.53E-05
PAX5	6.61	3.11E-05
CEBPE	8.41	8.84E-07
ADAM2	6.77	2.58E-04
FUCT1	8.52	1.13E-06
SLC18A3	8.15	2.23E-04
FAM179A	8.33	5.02E-05
PFKFB1	8.18	3.84E-04
ZNF541	7.85	1.02E-05
ACTL8	8.21	2.17E-04
NOL11	8.31	2.16E-04
CDH17	7.59	2.97E-05
CAPN11	7.25	2.89E-04
TNFRSF4	8.59	7.34E-07
CXCL2	8.32	3.83E-04
SLC17A6	6.97	1.84E-05
A1CF	8.48	1.97E-05
GALNT8	6.85	3.90E-04
KLHL33	7.55	1.69E-04
GPR148	8.51	1.55E-04
SLC5A12	6.84	3.41E-04
FOXN1	7.03	7.11E-06
ZNF804A	8.26	3.34E-06
GAL3ST1	8.68	1.65E-05
OSCAR	8.64	2.57E-04
GABRB3	8.2	2.23E-04
PADI4	7.25	4.03E-04
LHX1	8.01	1.23E-04
OASL	8.25	2.30E-04
TMEM236	8.34	9.00E-04
MOV10L1	8.06	7.08E-05
ABCD2	8.27	1.78E-04
XPNPEP2	8.33	5.07E-07
KLK15	8.8	1.34E-05
DRD1	7.92	1.89E-05
PSTPIP2	8.76	8.59E-05
ALOX15B	6.49	9.73E-06
SEC14L3	7.34	3.85E-04
CLIC5	8.53	3.14E-05
CXHXorf58	8.81	9.15E-05
PSMB8	8.84	3.84E-05
TRPV1	7.57	2.98E-04
NLGN4X	7.61	1.90E-05
SLCO1C1	6.67	8.92E-04
HTR1A	6.86	5.15E-08
C1H15orf43	8.56	2.73E-04
AGMO	7.75	2.28E-07
SIM1	7.03	7.00E-06
EFHB	8.12	4.09E-07
TMEM233	8.76	3.64E-05
CD1.1	7.32	4.25E-05
IL1R2	8.95	1.26E-05
HAO1	7.62	2.15E-05
GCET2	7.37	1.04E-05
RAB3B	8.88	4.09E-05
IRG6	6.65	2.51E-04
CCDC147	8.53	3.28E-06
FNDC7	7.99	2.03E-04
DNAJC22	8.99	1.54E-05
OTOG	7.13	2.27E-05
DIRAS1	8.97	1.35E-06
P2RY10	8.76	3.20E-04
MUC4	-2.53	1.94E-02
PLA2G4E	8.9	4.20E-05
GPR20	8.14	6.30E-05
ABCA6	8.99	1.39E-04
RPE65	7.69	2.07E-05
PTPRCAP	9.01	6.69E-07
UCP3	6.48	1.01E-06
LYPD8	7.29	8.75E-05
CD48	9.11	2.20E-05
SERPINA5	8.28	6.32E-06
CSF2RB	8.58	1.53E-07
KRT78	7.89	7.05E-06
MAT1A	8.16	4.02E-05
OTOGL	8.03	5.70E-06
GLB1L3	8.34	1.39E-06
RAD51AP2	8.67	3.07E-06
C4BPB	8.79	1.66E-04
B3GNT6	7.46	7.49E-05
ATP13A5	7.26	5.46E-08
ANKRD7	7.46	5.61E-06
GATA3	8.72	1.50E-05
TPH1	7.43	5.15E-06
INHA	9.16	2.47E-06
PRKCG	8.57	1.13E-06
PRKCB	9.14	1.09E-05
CCL8	9.22	6.04E-06
IGSF21	7.25	8.37E-05
ATP6V1B1	8.07	2.32E-04
NOR-1	7.93	1.16E-06
GABARAP	9.01	2.20E-04
HEPHL1	9.26	4.80E-06
ITIH6	7.9	2.44E-06
SRRM4	7.34	5.78E-05
AK9	7.61	1.32E-06
DEPDC4	9.2	7.04E-05
C17H20orf174	8.59	9.59E-07
GYS2	9.23	4.10E-10
IL18RAP	6.52	1.27E-04
SYCP2L	7.34	3.93E-08
SPN	8.26	4.65E-05
ZIC2	7.74	5.04E-04
DCDC2	7.83	1.68E-03
FABP1	9.1	8.76E-06
GSX2	7.53	1.77E-04
ADRB3	7.36	6.07E-07
DSCAM	8.6	5.13E-06
TEKT3	9.26	1.21E-05
KRT3	6.82	8.27E-04
RNF133	8.23	3.34E-05
GLRA3	9.39	1.20E-05
TLR7	8.53	1.12E-06
MIOX	8.37	3.83E-05
CATSPERB	7.1	2.42E-05
SFTPD	7.98	5.26E-05
AMCF-II	9.45	1.61E-06
HOXB3	-3.94	1.61E-03
C13H3orf20	8.2	1.11E-04
B2M	9.33	2.38E-04
RAMP3	9.38	1.40E-04
EFHD1	7.75	4.81E-06
ALDH3A1	9.28	9.47E-05
IDO1	8.15	1.31E-04
FCGR2B	8.32	8.00E-05
GLRA4	7.98	4.27E-04
STAT4	8.82	2.87E-06
ATOH7	9.35	3.66E-06
SULT2A1	7.32	5.46E-06
EMR1	7.26	9.24E-04
SLC6A13	8.98	3.51E-06
SIGLEC14	6.92	3.74E-04
GRXCR2	8.11	4.95E-05
CAPN9	7.13	5.86E-04
OPALIN	8.21	1.13E-05
GATA-6	7.74	7.54E-05
UBE2U	9.52	1.87E-05
RUFY4	8.54	1.92E-05
PLA2G2F	9.53	4.26E-07
UCHL5	9.51	1.08E-04
RASSF4	8.28	3.42E-06
TNXB	-1.7	3.01E-04
TGM5	7.81	5.73E-05
CACNA2D4	8.18	6.06E-05
BPIFB6	8.41	3.02E-04
IL31RA	7.81	2.92E-04
GRM1	8.99	1.20E-07
JAKMIP1	9.03	5.94E-06
CRTAM	6.91	7.78E-07
FCRL3	7.68	1.51E-05
PCDHA4	9.21	1.08E-06
PDZK1IP1	9.66	1.38E-05
MROH2B	6.46	1.02E-06
SLCO4C1	8.71	1.91E-07
TSACC	9.67	1.71E-05
MRPL55	9.53	1.24E-05
CELA1	9.03	2.32E-07
RBP2	8.03	4.18E-06
MTTP	8.05	7.82E-05
NMBR	8.92	2.87E-06
CCL4	9.72	1.95E-06
ARHGAP15	8.61	8.04E-07
GABRE	8.93	1.15E-05
PIWIL1	7.78	3.11E-05
SOX7	9.52	9.57E-07
FGB	9.23	4.46E-06
SST	9.83	1.68E-06
CLDN16	7.71	1.17E-04
ABCA10	7.46	5.75E-05
ARL14	9.84	1.22E-05
SLC24A4	8.88	3.23E-10
CCKBR	8.24	6.73E-06
S100Z	9.81	6.06E-05
SLA-5	9.74	2.25E-06
GAB3	8.97	1.47E-06
NMUR1	7.2	5.66E-04
CRB1	9.11	6.75E-07
RASAL3	9.8	3.64E-05
MSH4	9.33	3.51E-06
SERPINI2	8.53	1.62E-03
CNR2	9.14	2.75E-05
GPR81	8.67	7.07E-07
OLR1	7.73	4.15E-05
PLA2G4B	9.25	6.33E-07
CRSP-2	8.21	3.92E-07
TMCO2	9.87	1.27E-05
PCTP	8.39	2.91E-04
CHRNB2	9.05	1.24E-07
GRM4	7.6	2.52E-06
GPX6	7.48	2.99E-05
PCSK4	9.24	5.51E-05
SLC26A5	9.05	1.74E-05
KLHL1	-2.16	6.48E-04
TMEM82	9.89	2.55E-05
CKMT2	7.69	1.23E-03
LEMD1	9.99	5.23E-07
ETNPPL	9.48	5.23E-07
HYAL4	7.88	4.50E-06
SLC17A4	8.19	4.76E-05
RFX8	7.83	2.20E-07
CRP	8.41	1.24E-05
MLPH	9.95	1.76E-06
KIRREL2	9.12	3.30E-06
ATP6V0D2	9.61	6.99E-05
KYNU	8.25	6.53E-04
TEX36	9.98	1.75E-06
LAMP3	6.99	2.49E-05
GRXCR1	8.54	4.09E-05
LMAN1L	9.6	2.20E-08
LRP1B	10.05	4.94E-07
MEPE	7.42	3.70E-04
SPAG16	10.02	8.20E-08
LNP1	8.79	3.15E-04
KPNA7	8.29	5.04E-04
SLC36A2	8.36	3.06E-05
CD5L	7.45	1.94E-05
XK	-2.26	1.86E-02
DUSP9	9.75	1.47E-06
CREBBP	-1.26	3.65E-02
NEK10	9.3	3.11E-06
PROKR1	9.24	3.94E-04
NWD1	6.91	3.48E-04
TNFSF18	8.51	3.59E-05
HOXD3	-2.97	1.25E-02
EBI3	8.21	3.21E-04
SLC25A2	9.6	1.64E-06
SMIM17	8.66	8.94E-07
HTR3B	8.49	1.42E-04
VWA3B	8.86	4.92E-05
TNFRSF25	10.19	2.03E-06
GJC2	9.94	4.87E-06
ZGLP1	9.45	1.83E-05
PTPRO	10.08	7.13E-05
HEATR2	9.92	7.15E-07
TN-X	-1.02	7.59E-04
CNTNAP5	9.73	3.97E-05
CRYBB3	9.04	8.29E-07
EIF2S2	10.21	6.67E-07
CYP2C32	10.22	3.37E-05
CACNG7	9.65	3.14E-07
LIM2	8.9	2.34E-04
NOS1AP	9.37	2.82E-05
C2H11orf91	10.28	1.61E-05
NT5DC3	9.59	2.20E-04
TESPA1	8.67	4.85E-06
KRT36	8.7	4.85E-05
CPNE9	9.82	3.33E-05
CLDN18	8.58	1.72E-05
OSBP2	-2.81	2.80E-02
TMEM176A	9.26	8.39E-08
LYZL4	9.39	3.10E-06
KLHDC7A	-2.47	6.48E-03
MS4A6A	9.54	6.70E-06
TMEM81	8.89	7.18E-04
FLG	-6.87	2.41E-02
AOC1	-6.33	3.80E-02
INSM1	-3.07	1.46E-04
POU2F3	9.74	3.25E-06
SGCG	8.71	9.59E-05
CIB3	9.07	1.08E-05
CCDC67	9.75	1.34E-03
ROPN1	10.45	3.81E-06
C12H17orf67	8.95	1.13E-06
LEFTY2	6.41	9.27E-06
C4H1orf110	9.86	4.42E-05
SPIB	-2.63	2.87E-04
CCR2	9.03	2.52E-05
GLIPR1L1	8.78	9.28E-05
FAM19A3	10.28	9.51E-06
ZNF165	10.18	3.73E-05
PIWIL4	8.46	2.97E-05
TMEM8C	8.7	7.60E-06
HOXC13	8.49	1.37E-04
CC2D2B	10.37	3.76E-06
SLA-DRB5	-5.07	1.51E-03
ANK1	-2.41	1.71E-02
SPACA1	8.22	6.77E-06
XKRX	9.98	4.35E-05
GATA2	10.38	2.38E-08
FAM169B	9.49	3.62E-04
SLITRK3	8	2.37E-05
P2X3R	9.05	1.11E-05
DNAI2	-2.11	1.87E-02
KCTD19	-1.77	5.71E-04
CILP	-2.27	1.51E-02
SLC13A2	-3.55	1.69E-03
LAMB4	-1.52	1.86E-04
PCDHB1	-3.68	6.54E-03
USH1G	10.2	2.36E-05
SLC6A20	-6.53	4.96E-02
PRELP	-2.63	2.08E-02
SCP2D1	8.17	1.64E-04
STAB2	-1.03	4.36E-02
PLCB2	-2.68	1.21E-02
LY75	10.11	3.66E-05
SLC22A14	8.51	6.54E-05
PNLIPRP2	7.33	6.27E-04
TFEC	10.36	5.76E-05
ADCY1	-1.35	4.59E-02
C3H2orf16	-6.34	4.73E-02
ZAN	-1.1	1.32E-02
ALOXE3	7.34	1.51E-04
C1H9orf135	10.76	1.54E-07
SVOP	7.74	2.75E-05
MMD2	10.41	2.75E-08
ALDOB	10.8	4.55E-07
STXBP5L	-1.77	1.89E-03
VWC2L	-2.58	3.30E-03
NEFL	-1.47	8.28E-03
CDKL3	9.33	1.90E-04
PROB1	-2.24	6.28E-04
ZNF488	7.88	1.12E-04
ZCCHC16	-3.21	3.44E-03
SPTBN5	-3.37	4.00E-03
GALR1	8.02	4.31E-05
TNFSF13B	10.38	2.53E-06
ADM2	8.87	2.87E-07
DYDC1	9.75	4.25E-04
MMEL1	-2.73	1.39E-02
DMRTA1	9.96	1.45E-07
C13H3orf22	7.78	8.45E-06
DNASE1L3	9.02	9.07E-06
ARHGAP4	-1.75	3.78E-02
LY49	10.28	2.04E-05
IL15	10.94	1.01E-07
RGS9	9.49	3.48E-05
SPATA22	10.92	1.99E-05
MIR30E	10.96	1.09E-06
MIR34C	10.96	1.09E-06
C1QL2	10.17	1.76E-07
HSD17B3	10.04	5.47E-07
MAN2B2	-1.95	9.41E-03
PIWIL2	9.6	1.38E-06
SOWAHD	10.94	2.82E-10
GRM2	-1.44	3.46E-02
RSPH6A	10.29	7.49E-07
SLC6A3	8.69	1.85E-05
ARHGEF5	-1.66	6.84E-04
CPS1	-3.09	1.07E-02
UNC80	-2.81	1.14E-02
FAM196B	-2.88	3.94E-02
CAPN14	-8.76	2.01E-02
DOK7	-4.07	2.20E-04
UMODL1	-2.7	7.36E-03
RFX4	-2.49	4.14E-02
ATP6V1B2	9.41	2.86E-04
SLC1A2	10.57	6.10E-06
LGALS9	9.03	1.65E-07
NGB	9.98	1.48E-04
SYT10	10.7	7.09E-06
PAK7	10.94	1.10E-06
ADAM21	-4.74	6.15E-04
GRM6	-9.24	1.32E-02
PSAPL1	-2.77	1.11E-02
SLC7A14	-1.7	2.11E-02
SCML4	8.96	1.48E-06
ZNF215	10.87	1.05E-06
BPIFA2	-2.16	1.74E-02
C9H1orf105	10.16	1.75E-06
C13H3orf35	10.55	5.51E-06
DUSP26	-3.07	4.52E-03
IL1RAPL2	10.15	5.30E-06
GRPR	-2.1	1.13E-02
COL19A1	-1.6	2.15E-02
TRPV3	-2.61	3.31E-03
CHRNA10	-3.88	4.26E-04
DMRT2	-2.97	6.77E-03
IL6R	10.86	4.72E-06
ABLIM2	-2.08	1.80E-02
REN	-1.92	4.15E-03
PIH1D3	10.96	7.94E-09
MS4A7	10.2	3.45E-06
DMGDH	-2.94	1.14E-02
MYO18B	-4.09	2.66E-04
MIR30C-1	11.29	1.45E-05
FTCD	-2.61	1.01E-02
KLHL30	-4.6	9.54E-03
ENY2	10.68	2.55E-05
DPP6	-1.73	1.09E-02
PILRA	-2.44	2.88E-03
BCL2A1	9.12	9.19E-04
SLC25A48	11.12	4.17E-06
SELE	10.59	1.57E-05
FAM92B	-3.55	1.87E-03
GRAP2	-4	1.74E-02
HOXB8	-7.2	3.26E-02
GABBR2	-1.52	4.44E-02
GYPA	10.28	6.07E-05
MUC6	-6.92	4.48E-02
IL-1beta	9.16	1.18E-03
GADL1	-1.65	4.12E-02
CSF1R	-1.87	1.78E-02
IL10RA	-1.74	1.90E-02
KRT1	-3.67	5.03E-03
GALNT14	-1.02	2.38E-02
CD209	9.12	1.83E-04
NR1I2	-6.97	4.12E-02
LRRC32	1.12	2.03E-02
C2	-3.61	5.11E-04
FAM3D	-3.14	1.19E-02
TCEAL5	10.78	1.13E-08
FGD6	-3.08	6.34E-03
CRYGS	10.82	4.20E-05
CA8	10.9	5.61E-06
TAGAP	-2.47	4.13E-02
CCL23	10.69	1.89E-05
PTPRN	-3.59	1.86E-03
TNFSF4	11.25	2.14E-05
CALB2	10.55	2.19E-05
VPREB3	9.73	5.96E-07
CD180	-8.95	1.81E-02
DNAH1	-2.36	3.03E-04
PIK3CG	10.79	5.16E-06
RIMS2	11.13	1.08E-07
VGLL1	-9.74	1.40E-02
SEC16B	10.41	3.30E-05
MUC20	-3.16	1.51E-02
SLC44A4	-1.51	4.15E-02
EPYC	-3.74	1.23E-03
RDH16	-2.06	2.50E-02
NEK11	10.98	6.41E-07
ARGFX	-8.92	3.95E-02
FAM47E	-3.55	1.44E-02
CRISP2	-9.25	2.17E-02
KLK1	8.57	1.89E-05
GC	-9.9	8.26E-03
CHRND	-4.14	2.63E-03
TMEM252	-7.13	4.55E-02
DNHD1	-1.24	7.36E-03
ARHGAP39	-1.18	2.99E-02
BMP15	-11.47	3.16E-07
GPR156	1.43	1.26E-02
VGLL2	-3.74	1.82E-02
PIK3CD	-1.07	4.13E-03
PDIA2	-2.83	3.15E-04
ZBTB16	-3.67	1.87E-02
LMOD2	-3.06	1.81E-02
PDE4A	-1.8	2.39E-02
CADM2	11.34	1.87E-06
MIR1306	11.63	9.53E-07
BMP2	11.23	1.20E-07
MIR148B	11.63	3.06E-05
MIR128-1	11.59	5.21E-06
AR	-3.05	3.26E-04
WDR65	-3.16	2.87E-03
ATOH1	-7.08	3.71E-02
GTSF1	10.32	1.01E-04
MIR193A	11.49	3.45E-06
LYSMD2	10.71	3.07E-05
MYPN	-3.53	7.28E-04
ICAM5	-3.61	1.17E-03
VWC2	-2.05	9.50E-04
PLK5	-2.82	8.44E-03
NPR3	10.81	6.07E-05
C6H1orf177	-9.3	2.72E-02
CILP2	-2.47	4.45E-03
ASIC4	-2.28	7.75E-03
PGR	-3.93	1.66E-02
CD53	11.32	2.74E-07
SLFNL1	-1.05	1.24E-02
CYP4A21	-9.83	9.52E-03
FLRT1	-3.44	3.94E-02
GPR128	-9.64	9.72E-03
FAIM3	-3.68	1.37E-03
CLPS	-1.05	2.10E-02
TEX12	11.82	5.76E-06
ZPBP	11.65	2.82E-06
FREM3	-7.5	2.71E-02
FNDC1	-1.81	5.61E-03
LMTK3	-1.49	2.81E-03
IL7	-4.5	1.99E-03
ELTD1	11.55	6.19E-06
WIPF3	-1.47	4.40E-02
SESN2	1.15	7.38E-03
LSMEM1	-4.55	7.55E-04
VSIG10L	-1.01	9.81E-03
CCDC13	-3.99	1.83E-06
ATP1A4	-1.97	8.74E-03
GLB1L2	-4.68	2.49E-03
NDST4	-5.41	8.33E-04
MIR1343	11.64	1.03E-04
ITGB2	-1.68	2.90E-02
SAMD9	1.33	4.79E-02
RYR1	-3.17	6.46E-05
ST6GALNAC-V	11.63	6.52E-06
HABP2	-4.81	3.17E-03
XIRP2	-2.76	1.75E-03
VWA3A	-2.2	2.16E-03
SEL1L2	-2.47	9.45E-03
K6-IRS1	-4.55	6.53E-04
DGKK	-3.43	6.62E-03
MIR130B	11.96	7.68E-07
ASIC1	-3.6	4.49E-03
MIA	-2.28	1.42E-02
CXCL11	-12.33	6.82E-06
DUSP27	-4.5	5.16E-04
DYDC2	-10	1.67E-02
CRSP3	11.35	4.58E-06
PABPC1L	-3.89	1.77E-03
KCNE4	-1.78	4.52E-02
GRIN2C	-2.91	6.50E-04
MIR320	11.82	6.31E-06
UPK3B	-1.86	1.78E-03
SYT6	-3.86	4.88E-03
BHLHE22	-3.35	1.85E-03
PRKCQ	-2.55	2.17E-02
TMPRSS6	-4.94	9.86E-04
RAI2	-1.5	1.59E-02
INPP5J	-1.68	4.03E-02
IGFBP1	-12.51	4.62E-06
PSMF1	11.88	1.28E-06
FNDC8	-9.27	1.70E-02
ITLN2	11.81	4.02E-06
SPPL2C	-7.76	2.94E-02
EBF2	-4	1.09E-04
BDKRB1	-1.99	1.74E-02
SLC5A2	-9.45	2.21E-02
GPR17	-7.3	4.69E-02
GULO	-2.28	1.20E-02
RNPC3	-4.25	2.12E-03
SOWAHB	-1.63	2.01E-02
ITGAM	-1.33	1.02E-02
GDF10	-3.51	3.03E-03
CNTN2	11.81	1.76E-07
BTG4	-3.02	1.08E-02
CYP1A2	-9.26	1.28E-02
MYLK2	-2.62	3.48E-03
OTX2	-3.94	1.38E-02
QRICH2	-4.88	3.76E-04
CSMD2	11.87	1.05E-06
KRT35	10.04	1.30E-04
LDB3	-3.14	8.04E-04
HFE2	-3.39	1.17E-02
THPO	-2.43	4.22E-03
FOXP3	-2.82	2.96E-02
OTC	-5.6	6.54E-05
ZMIZ2	-2.55	1.43E-02
MEOX1	-2.11	2.15E-02
TMPRSS2	-2.58	4.38E-03
SMC1B	-3.14	1.23E-02
HTRA4	-4.21	4.75E-03
TAC1	11.48	1.64E-07
VPAC1	-2.42	4.49E-03
CTXN3	-2.62	2.14E-02
ATG9B	-1.37	2.25E-02
KCNC3	-5.41	3.65E-03
TRIM72	-5.43	7.33E-03
MMP23B	-3.74	4.69E-03
MYF5	-4.21	2.99E-03
PRRT2	-2.13	1.84E-02
CLEC18A	-7.29	4.57E-02
PGA	-7.39	4.24E-02
ADRA1B	-1.46	1.31E-03
C5	1.85	1.28E-02
CRISP3	-2.98	3.36E-02
DLK2	-2.87	4.45E-03
ALK	-4.4	2.65E-03
SIT1	-3.24	1.53E-02
MIR362	11.98	5.94E-05
TCTEX1D4	-2.97	4.16E-03
PTGDR	-4.3	3.11E-03
NRIP3	1.68	1.17E-03
SASH3	-2.89	2.85E-02
SLC43A2	1.12	7.93E-03
CARD14	-2.23	2.03E-02
NME5	12.22	1.56E-05
SLC23A3	-4.33	4.55E-03
GUCY2F	-9.91	1.90E-02
RAB44	-2.17	2.55E-02
SLC1A7	-3.65	5.00E-03
INA	-3.28	1.65E-02
CTRB2	-2.88	1.27E-02
HTR6	-8.22	2.01E-02
CAPN12	-4.94	1.36E-03
FAM124A	-2.74	1.22E-03
KCNJ6	11.35	5.35E-05
ARX	-7.65	3.84E-02
PARP14	-3.64	1.29E-04
QRFPR	11.82	2.45E-05
KLHL31	-4.69	3.80E-05
IGFBPL1	-1.81	3.72E-02
RNF208	-3.6	4.93E-03
RSPH10B	-2.55	7.23E-05
CCKAR	-1.8	4.31E-03
CYTIP	12.06	3.21E-06
MUSTN1	-2.03	1.58E-02
BPIFA1	-3.26	6.19E-03
BEST3	-5.07	1.11E-03
TRNAL-UAG	12.26	1.93E-05
A1BG	-5.11	2.79E-03
NPAS1	-3.5	1.07E-02
GRIK2	12.27	1.29E-05
NHLRC1	11.73	2.27E-07
IGFN1	-2.88	5.74E-04
GNB3	-2.24	2.81E-02
FAM178B	-1.69	4.31E-02
KCNJ14	-1.69	4.85E-03
ZAP70	-3.35	1.77E-03
SLC6A2	-3.57	2.00E-03
ATP1B4	-3.6	8.08E-03
MIR221	12.35	5.98E-06
KY	-1.95	2.98E-03
XDH	-5.01	1.52E-03
NPY2R	-5.21	3.58E-03
ACSL6	-2.64	2.99E-03
C1QTNF3	-3.43	1.04E-03
SCNN1A	-2.91	3.69E-03
ANKAR	-12.5	1.24E-05
NLRP6	-4.11	6.52E-03
CD79A	-1.73	1.80E-02
GP1BA	-5.27	1.89E-04
CD86	-1.29	5.44E-03
TMEM143	-1.67	2.47E-02
BPIFB3	-3.11	3.83E-03
ESR2	-3.6	9.97E-03
CRH	-2.63	1.70E-02
MORN3	-3.94	8.91E-03
FOXA3	-7.61	3.85E-02
KIAA0101	-1.82	1.25E-03
SCNN1B	-2.64	7.01E-03
MEIS2	-4.71	1.14E-04
KERA	-3.64	6.83E-04
TMEM229B	-1.22	3.94E-03
ZCCHC12	-1.93	2.52E-02
GTF3A	-2.37	1.22E-02
NDEL1	1.62	1.41E-02
GRB7	1.04	9.22E-03
ELF5	-1.34	3.34E-02
CYP2C42	-5.62	4.37E-03
RBM24	-1.81	3.52E-02
MIR505	12.29	1.57E-04
SLC4A8	1.54	1.28E-02
ERBB3	-2.38	8.16E-03
ZYG11A	-2.84	2.17E-03
C1H14orf105	-3.61	7.69E-03
MIRLET7A-2	12.15	4.64E-05
CELF4	1.22	4.59E-02
PHF21B	-1.16	7.96E-03
FGFR4	-2.13	3.63E-03
SLC47A2	-4.91	3.24E-03
PLIN4	-6.05	2.46E-03
CYP2J34	12.55	3.18E-07
CEACAM19	-2.16	1.75E-02
PDE6A	-4.64	8.31E-03
MIRLET7G	12.49	1.72E-05
ACTRT3	-3.21	2.39E-03
ARPP21	-2.09	2.80E-03
SIM2	-4.3	1.30E-03
C9H11orf88	-3.35	1.84E-03
ASIC3	-2.01	2.32E-02
STX1B	11.47	7.03E-07
CARNS1	-1.92	2.01E-03
SNX31	-4.48	1.08E-02
CD14	-1.91	3.25E-02
PON1	-7.72	4.22E-02
TRIM15	-7.57	4.78E-02
GDAP1	1.36	4.73E-02
CBY3	-12.66	6.15E-07
ODF4	-2.97	6.77E-03
PLK3	1.03	1.31E-02
DMKN	-2.48	4.94E-03
KRTDAP	-9.68	4.74E-02
DYRK4	-2.15	8.83E-04
MIR574	12.49	3.66E-05
LCT	-2.68	2.48E-03
FTMT	-7.88	3.12E-02
AQP9	-1.29	3.03E-02
GK2	-10.93	7.86E-03
OLFM2	-2.14	5.33E-03
DPYSL4	-1.01	2.30E-02
TEKT2	-2.07	3.75E-02
SLC22A3	-1.14	1.33E-02
SDR16C5	-4.85	2.44E-03
TRPC5	-1.58	2.11E-02
TRIM55	-4.17	1.22E-04
SPTB	-3.66	2.67E-05
LGR5	-2.08	1.36E-02
WNT2	-2.41	9.38E-04
MCF2	3.13	8.72E-04
VIPR2	-1.69	2.90E-02
KCNN4	-12.48	2.56E-05
CYP17A1	-9.23	2.30E-02
PPP1R3A	-5.35	1.93E-04
MIR29C	12.68	3.93E-06
GJB7	-2.93	1.75E-03
SLC36A1	1.34	2.22E-02
GPR151	-4.02	6.76E-03
PHACTR3	-1.01	5.77E-03
PWWP2B	-1.03	1.88E-02
TMEM106A	12.05	2.54E-06
ACSM5	-2.7	1.23E-04
CLVS1	-4.09	8.84E-04
ANO2	-2.08	2.39E-02
ACSBG1	-2.88	4.61E-03
HCK	-1.72	1.26E-02
C4BPA	12.42	3.51E-06
C3H2orf73	-7.73	3.99E-02
COL28A1	-6.3	2.76E-03
C8A	-5.13	1.05E-03
EXPH5	-1.55	5.31E-03
ANKRD34C	-8.22	1.72E-02
MIR99B	12.74	5.97E-07
ARHGAP20	-8.2	2.41E-02
IL10	-2.38	9.57E-03
SPATC1	-4.41	6.34E-03
SP2	-2.02	4.24E-03
GBX1	-4.21	2.57E-03
APOL6	-10.43	1.69E-02
FAM180A	-7.65	4.46E-02
MLNR	-4.41	3.72E-03
TLE6	-3.21	9.13E-03
ZBP1	-2.83	6.27E-03
NR2F1	-4.01	3.75E-03
MOCOS	-1.32	7.56E-03
GPER1	-3.42	1.16E-03
APCDD1L	-10.32	1.39E-02
LTB4R2	-2.26	3.20E-03
UNC45B	-3.24	9.61E-03
GATA1	-7.36	4.51E-02
GCNT3	-2.42	6.88E-04
BMPR1B	-2.83	2.96E-03
DENND3	-1.23	1.07E-02
TENM1	1.32	3.67E-02
ARHGAP30	-2.64	4.28E-04
BPIFC	1.03	2.64E-02
NUTM2G	9.8	4.68E-03
HDGFL1	-1.46	2.38E-02
KCNU1	-5.04	3.46E-03
SMCO3	-3.97	2.26E-03
CYP21A2	-5.82	2.08E-03
BBOX1	-5.38	2.51E-04
GPHA2	-2.45	8.86E-05
CLDN19	-4.21	1.83E-02
GPR15	-3.07	4.84E-02
CYP7A1	-2.05	1.38E-02
PER2	-2.03	1.50E-04
SLC46A3	-1.82	6.74E-03
SYT13	-2	2.81E-03
CDH9	-6.15	6.59E-04
DNAH3	-3.33	8.85E-04
SEZ6	-5.01	2.81E-03
CECR2	-1.76	1.03E-03
DMRTB1	-5.23	8.38E-05
KEAP1	-3.85	1.18E-02
C2CD4D	-6.52	1.76E-04
PNCK	-1.49	4.48E-02
TWISTNB	-3.28	3.47E-03
CACNA1E	-1.15	1.23E-02
ICA	-3.32	1.11E-03
ZMYND15	-10.29	1.75E-02
IL21	-13.21	2.15E-07
EFCC1	-1.86	1.58E-02
CACNA1F	-4.48	1.46E-04
NR3C2	-2.06	1.62E-03
OSR1	-2.94	1.30E-02
F2RL3	-8.08	2.54E-02
SYN1	-3.21	3.72E-04
EFCAB9	-13	4.77E-05
STAC3	-1.2	4.19E-02
ANO3	-4.82	1.59E-04
ZMYND10	-1.95	5.27E-03
GGT5	-1.88	1.82E-03
SUMO1	12.77	4.77E-05
FOXE1	-3.21	5.90E-03
PYGM	-2.5	1.86E-03
SEMA5B	12.94	2.27E-07
FANK1	-1.59	6.79E-03
MIR135-2	12.5	4.25E-04
LIPM	-5.52	2.27E-03
AOAH	1.79	1.12E-02
NR2E3	-5.04	5.91E-03
JPH1	-1.68	5.22E-03
PROSER1	12.51	2.19E-06
MMP8	-3.35	1.99E-02
CSN3	-12.19	2.48E-07
KRT12	-6.04	3.53E-04
LRRC71	-3.38	7.53E-03
ADAM28	-2.55	1.92E-03
RGS14	-1.77	4.13E-04
ALOX12	-7.86	3.90E-02
LDHC	-3.37	4.25E-03
ADAMTSL4	-2.75	2.48E-04
ODF3B	-3.99	6.63E-03
FRMD7	-4.32	4.12E-03
KRT39	-8.24	2.95E-02
IL15RA	-3.85	2.34E-03
RNF224	-4.85	5.26E-04
C6H1orf233	-1.64	7.81E-03
KRT28	-4.27	5.80E-04
SCIMP	-8.08	3.71E-02
ISLR2	-4.33	4.76E-05
IZUMO1	-2.59	2.23E-03
IGSF22	-7.87	4.04E-02
HPD	-8	4.52E-02
PITPNM3	-3.09	3.23E-03
PCDHGA1	2.08	1.39E-03
TMEM88B	-4.41	3.21E-03
TAL2	-2	4.32E-03
RRM2B	2.16	1.37E-02
MROH6	-2.87	4.79E-04
CCDC96	-2.53	1.46E-02
GRAP	-1.31	2.74E-02
MIR125A	13.02	9.77E-06
FOXL1	-3.61	2.31E-04
TEX15	2.33	1.34E-02
CDSN	-8.83	2.29E-02
CLCA4	-4.68	3.33E-04
DUSP13	-4.14	6.39E-04
GABRR1	-5.2	1.15E-04
UCP1	-1.92	4.36E-03
DPEP3	-3.93	5.19E-03
C7H14orf50	12.65	1.52E-06
MYH15	-4.21	3.28E-04
GJA8	-8.27	2.41E-02
PLEKHB1	-3.97	3.34E-03
SPACA7	-10.19	2.09E-02
PRSS36	-2.33	1.52E-03
ZHX2	-1.4	4.98E-02
SPATA17	12.89	5.52E-06
TTC16	-2.1	4.16E-03
CBLN3	-3.38	3.54E-03
HPCAL4	1.07	1.82E-02
SLC18A1	-3.39	6.10E-05
RGS1	-2.32	4.77E-02
MIR145	12.91	3.87E-05
NDP	13.09	6.17E-09
PRPH	-2.03	1.56E-02
TMEM176B	-1.5	1.17E-02
GNAL	-2.86	6.87E-03
NOL4	1.55	4.91E-02
SLC5A1	-2.18	9.06E-03
FLVCR2	-1.05	1.71E-02
TEDDM1	-8.22	3.09E-02
C3H16orf90	-13.26	3.21E-05
CDX4	-7.91	3.66E-02
S100A7	-10.38	2.60E-02
RASAL1	-5.94	3.10E-03
CCT6B	13.14	1.35E-06
HTR2A	-4.07	1.03E-03
TMEM163	-2.12	3.82E-02
CFC1B	-10.7	1.99E-02
NT5C1B	-7.94	3.33E-02
CTR1	2.23	2.17E-03
SH2D3C	1.55	2.69E-02
CDK3	-1.64	5.91E-03
C1QL4	-3.79	2.39E-03
14-Sep	-8.99	1.83E-02
MIR103-1	13.14	5.21E-07
NOV	-1.91	3.38E-02
HSPB9	-3.55	1.10E-02
GRIN2D	-2.04	3.75E-03
PADI2	-1.42	8.37E-03
MUSK	-5.33	4.18E-04
TNR	-5.43	3.68E-04
FHL5	-2.37	2.06E-02
SSTR2	-2.56	1.14E-02
MSC	-5.74	2.75E-03
PHC2	-2.08	1.84E-03
C18H7orf31	-4.94	1.26E-03
OTOR	12.48	8.27E-06
RTBDN	-7.77	4.69E-02
NAIP	-13.55	3.87E-06
MYH2	-3.68	1.87E-03
SGK2	-8.24	2.79E-02
PI16	-4.94	2.39E-04
SLA-DYB	-3.52	5.93E-03
NXNL2	-2.63	5.53E-03
IL12A	-5.76	1.92E-04
PCDHA13	-1.54	1.42E-02
SLC12A5	-4.71	6.45E-05
ABCC2	-4.96	8.46E-06
CLDN9	-5.94	5.91E-04
SH2D1B	-8.38	3.54E-02
FMO4	2.35	3.86E-02
FAM222B	-1.96	1.59E-02
MAP3K19	-8.77	2.00E-02
C13H3orf56	-10.57	1.64E-02
SLX4	-1.03	1.78E-02
C3H16orf54	-2.47	3.68E-03
RDH5	-5.27	8.54E-04
RNFT2	1.45	4.16E-03
C2H2orf81	-2.04	8.79E-03
C4H8orf34	2.33	5.17E-03
BCAS1	-2.6	1.34E-03
IFNLR1	-2.81	1.77E-02
ZNF840	-8.66	2.41E-02
GRIK5	-1.3	2.85E-02
NME9	-10.92	1.03E-02
KCNMA1	-1.16	9.18E-03
GPRIN2	1.11	1.98E-02
FAM205A	-6.47	2.82E-04
TRNAT-CGU	11.6	3.32E-06
CHRM5	-10.83	1.66E-02
SELL	7.98	1.06E-04
MYRIP	-4.42	1.10E-03
PAPPA2	-3.33	2.60E-04
SLC7A4	-2.66	1.13E-03
CELF5	-2.42	1.80E-02
METRN	-13.53	3.28E-06
DNAJC28	1.56	4.13E-02
SPHK1	-2.74	2.00E-03
SERPINC1	-3.78	5.14E-03
SRPK3	-3.21	9.65E-04
AKR1C4	-5.22	1.96E-03
SYNPO2L	-4.82	1.15E-04
ZNF641	2.28	1.37E-02
TCEAL3	-3.63	6.13E-03
SLC16A6	-1.17	3.84E-02
SERTM1	-2.75	3.64E-03
ZBTB2	1.99	1.96E-02
RGMA	-1.67	1.55E-03
ARMC3	-6.68	7.43E-04
GDPD2	-3.93	3.11E-03
BCL2L14	-8.19	3.60E-02
PTGFR	2.73	2.97E-03
DEFB1	-10.32	4.11E-02
ANKRD53	-1.99	3.22E-03
ADH7	-6.54	1.08E-05
CLDND2	-3.69	3.81E-03
SHE	1.7	3.95E-02
LRRTM1	-3.12	1.49E-03
TOX	1.09	4.64E-02
ADARB2	-2.15	3.92E-04
RP9	1.36	3.14E-02
EML5	-2.53	6.81E-03
SYN2	-1.34	4.24E-03
NEK5	-1.67	1.27E-02
FMNL1	-2.29	1.86E-02
BMP8B	-2.3	3.25E-02
HIC1	-1.18	3.89E-02
PIEZO1	-1.29	2.19E-04
PHF10	-1.81	2.18E-02
DUPD1	-5.74	3.69E-04
RGS18	-7.73	4.94E-02
TMCO5A	-8.12	4.91E-02
GGN	-2.78	3.08E-03
TCAP	-3.43	3.00E-03
FAM71E1	-1.51	1.93E-02
PMEL	-3.68	4.13E-04
MIR107	13.23	3.33E-06
STOX1	-1.34	1.60E-02
IL2RA	-4.97	2.88E-03
UNC13D	-2.48	3.59E-03
PCNXL2	1.73	1.58E-02
GPSM3	-3.99	3.10E-03
PLA2G3	-1.12	3.79E-02
TAS1R3	-2.62	4.98E-04
HTR3C	-8.42	3.36E-02
REC8	-3.44	1.03E-03
DNAJC6	1.53	9.56E-03
KIAA1045	-1.15	2.33E-02
CNFN	-4.94	7.87E-04
RFX6	-2.73	7.45E-03
SLC4A5	-8.83	1.79E-02
IFIT2	-2.88	8.04E-03
AMPH	-1.1	4.61E-02
ZNF703	-1.22	7.81E-03
RAB33A	-2.43	5.10E-05
FBXO41	-2.01	1.73E-04
HCN3	-1.68	2.78E-02
RPS6KL1	-3.53	4.59E-04
ERBB4	1.6	3.29E-02
IGSF1	1.77	3.15E-02
NPHS2	-4.11	3.46E-03
WNT8B	-6.4	8.93E-04
GP5	-2.33	1.45E-03
CPNE8	2.03	1.46E-02
DNAJB7	-10.62	1.48E-02
NAGS	-5.88	1.71E-03
FAM186B	-1.58	1.69E-02
COL4A4	2.97	1.13E-02
CCL20	-11.07	1.19E-02
SNCB	-8.25	3.41E-02
CACNA1S	1.2	3.43E-02
THBS4	-1.56	1.69E-02
MECOM	2.11	4.27E-02
GJD4	-2.24	5.77E-03
SAMSN1	-4.41	5.29E-04
SACS	-1.3	5.44E-03
FAM186A	-9.89	7.58E-03
PDC	-11.24	1.11E-02
NLRC3	-6.36	6.56E-05
PEBP4	-2.42	1.16E-03
MAGIX	-1.5	1.11E-02
CLDN23	-2.3	3.52E-03
CNGA3	-10.61	1.13E-02
CAMSAP3	-1.33	1.16E-02
CD6	-7.97	4.64E-02
EHF	-3.5	1.60E-03
NOS3	-2.28	5.19E-03
PELI3	-1.87	2.52E-03
PIFO	-8.48	3.23E-02
PTPN7	-4.39	5.28E-05
BPIFB1	-5.01	5.86E-04
C1H15orf52	-1.29	1.88E-03
CHDH	-2.24	4.21E-04
BIK	-3.06	3.87E-03
RANBP3L	-4.46	1.42E-04
PDZD3	-5.08	3.15E-04
ANKDD1B	-2.92	2.23E-03
DNAAF1	-3.61	8.99E-04
PRR15	-3.93	1.55E-02
GNA14	-4.96	2.20E-04
PKDREJ	-3.18	1.66E-04
MEFV	-8.91	1.81E-02
FGR	-1.68	1.65E-03
SOX15	-3.31	8.03E-05
ATP2C2	-1.49	5.34E-04
CSRP3	-2.73	7.19E-03
MIR628	13.42	1.40E-06
STAT6	-2.01	7.52E-03
PML	-1.05	1.62E-02
FAM50B	-9.04	1.65E-02
SLC7A9	-8.55	2.88E-02
GRAMD3	-1.43	1.70E-02
SLC15A1	8.95	1.81E-05
GRAMD2	-1.94	1.73E-02
AFGF	-6.04	5.08E-04
CIDE-B	-3.53	1.54E-03
FHAD1	-1.14	1.81E-02
P2RY13	-9.75	9.08E-03
MUC21	-11.29	1.42E-02
TMEM187	-2	5.59E-04
C2H19orf57	-1.07	2.62E-02
GABRA3	13.28	5.91E-06
ADH1C	-8.51	2.92E-02
FAM211B	-2.78	8.24E-03
SLC46A2	-2.61	1.99E-03
FAM107A	-2.76	7.06E-04
CXCL13	-14.07	7.18E-10
PPM1J	-4.17	3.28E-03
TEK	1.37	1.14E-02
SMYD1	-4.63	3.48E-03
LRFN5	2.49	1.36E-02
RNF125	1.39	3.93E-02
FSHR	-8.68	2.56E-02
CXHXorf61	-7.98	4.62E-02
POU5F1	-11.15	1.33E-02
ZNF594	-2.53	6.01E-03
AADAT	-8.33	3.92E-02
DCAF12	1.99	2.13E-02
FUT9	-1.79	4.28E-02
SH3PXD2B	1.08	8.95E-03
BST2	13.57	3.44E-08
PER1	-1.06	2.05E-02
KLF17	-4.47	6.02E-05
ZNF503	-1.72	5.49E-03
LCN15	-2.13	1.72E-02
MYOZ1	-2.69	3.50E-02
CBX5	-1.67	9.44E-04
FBXO40	-6.97	3.90E-05
GPR62	-5.41	9.20E-04
MIR98	13.31	1.48E-04
LRRC4	-1.84	4.77E-02
SUFU	1.05	1.21E-02
PSAT1	1.21	2.26E-02
NIPAL4	-1.68	1.29E-02
ADAM11	-2.08	4.78E-03
VGLL3	1.57	2.46E-02
VWA5B2	-1.28	8.48E-03
ZBTB7C	-1.24	1.55E-02
ADAM19	-1.22	1.32E-03
PRUNE2	-3.15	6.28E-04
TRIM14	-3.81	1.22E-04
IRF7	-1.61	9.99E-03
BTBD11	2.03	1.47E-02
ZNF782	1.9	1.19E-02
KCNC2	-2.55	4.34E-02
AKAP14	-10.67	2.38E-02
LHFPL5	-7.92	4.52E-02
CA5B	-1.39	1.58E-02
TBX10	-10.74	2.14E-02
LRRN4	-6.19	4.23E-04
SLC18B1	2.7	1.46E-02
ABCB4	-7.05	1.03E-03
PLCD4	-4.01	1.53E-04
MOGAT1	1.33	1.62E-02
ANPEP	1.8	1.22E-03
GPRIN1	-2.66	2.89E-03
PRF1	-6.73	2.55E-04
KIAA1984	-4.13	3.43E-03
CARP	-5.33	5.27E-05
AGT	-9.13	1.76E-02
KIRREL3	-1.63	4.46E-02
KIF12	-1.92	4.74E-03
IREB2	2.6	1.16E-02
NUTM1	-6.68	2.63E-04
CTNNA2	2.44	3.52E-02
SP5	-1.37	3.69E-03
CLDN24	-13.72	3.73E-05
AZGP1	-1.43	1.59E-02
ABHD15	-1.72	1.75E-04
EPHA5	1.9	2.67E-02
PTCRA	-4.49	2.57E-04
KRT20	-6.71	5.07E-05
IGF1	-2.16	8.06E-03
FOXH1	-4.74	6.32E-04
ADAM33	-2.5	1.61E-04
PPP4R4	2.73	5.93E-03
SHC3	-1.21	3.11E-02
POU1F1	-8.55	3.18E-02
GRIA4	-1.78	1.33E-02
EPOR	-8.38	3.79E-02
TMEM132D	1.52	4.13E-03
M1AP	-5.7	1.99E-04
PLRG1	2.12	1.18E-02
NCF2	-2.81	8.24E-03
EXOC3L1	-2.87	8.54E-04
TTNLOC100620261	-4	1.17E-04
C4H1orf111	-11.2	1.15E-02
SULT2B1	-1.68	4.17E-02
SNED1	-1.64	2.80E-03
CCDC166	-1.79	1.07E-02
NCF1	-3.6	2.67E-04
AGPHD1	-1.85	6.67E-03
C1H9orf84	-9.16	1.73E-02
TIE1	-2.84	1.58E-03
SCN1A	2.18	1.15E-02
KIF25	-3.03	2.84E-03
SPATA4	-4.34	4.98E-04
SPINK4	-11.4	1.49E-02
CASQ1	-2.89	6.64E-03
CNTNAP1	-3.2	3.99E-04
SLA-DRB4	-4.9	2.86E-04
C3H16orf93	-1.83	1.74E-02
VSTM5	-2.21	1.32E-03
MAK	-6.46	1.16E-05
C14H10orf99	-5.11	2.42E-03
ETV2	-2.68	2.78E-03
RAB6B	-1.57	2.17E-02
TRNAV-UAC	13.74	6.89E-11
ATP2A1	-5.13	1.05E-05
ZNF750	-2.32	2.45E-03
CASP10	1.96	3.17E-02
GABRP	-2.79	4.40E-04
SRCIN1	-4.8	1.36E-03
CD38	-2.95	3.94E-04
ODF3	-5.74	1.23E-03
FMO2	13.67	7.19E-06
CDHR3	-11.14	1.53E-02
MIR152	13.81	7.94E-07
CD80	-6.46	3.01E-04
SPATA25	-3.35	4.17E-04
DUOX1	-2.31	1.84E-04
PIDD	-1.62	7.14E-03
MARVELD3	-1.07	1.85E-02
NEURL	-2.44	1.13E-03
BEST2	-1.41	4.83E-03
MMP19	-2.28	5.19E-03
BPIFB5	-6.84	5.51E-05
LIMD1	1.4	1.08E-02
TOP1MT	-5.32	2.15E-04
MPST	-1.02	2.14E-02
P2Y12R	-3.87	4.79E-03
MYO1H	-6.26	1.42E-04
CXHXorf66	-9.75	1.32E-02
MYBPC3	-2.7	1.82E-04
KRT26	-8.48	3.33E-02
PSD	-2.46	2.12E-03
TTC36	-4.39	4.52E-04
C17H20orf112	-1.16	4.31E-02
PEX2	1.7	9.74E-03
INSIG2	13.58	7.46E-06
PROX2	-9.87	9.95E-03
FZD4	1.36	1.43E-02
OSBPL6	2.02	4.87E-02
TUBB1	-5.8	6.29E-05
ABRA	-6.12	4.95E-03
LTC4S	-4.74	1.75E-03
NDUFA4L2	-3.09	6.89E-04
PURA	2.02	4.62E-02
MIR20	13.05	8.13E-06
KCNH8	-3.33	7.46E-04
CD55	1.55	3.61E-02
MEGF10	-1.34	3.06E-03
TMEM247	-8.68	3.06E-02
TMEM249	-1.95	1.41E-02
CD2	-9.52	1.76E-02
IFN-ALPHA-5	-13.53	9.96E-06
TRIM42	-9.33	1.89E-02
DEPTOR	-1.73	6.09E-03
CELF3	-5.98	2.11E-04
SRGAP1	1.3	1.40E-02
PDE8A	1.49	2.42E-02
SPATA21	-11.67	6.83E-03
SLC16A8	-3.17	6.24E-04
LACE1	1.54	1.90E-02
CAMK1G	-2.12	7.81E-03
TULP1	-2.69	1.20E-04
OXT	-3.88	1.20E-02
LURAP1	-1.84	1.66E-02
SIGLEC-1	-7.65	6.76E-04
GHRL	-11.61	1.14E-02
GPX2	-3.34	3.84E-02
ASXL3	1.69	3.93E-02
SLC38A4	-2.99	2.72E-03
SLC2A11	-2.12	4.40E-04
TGM1	-1.96	7.86E-03
SPAG8	-1.2	4.49E-02
TREH	-5.67	2.85E-04
TSSK2	-11.68	5.34E-03
RBM47	-1.22	6.36E-03
LMO3	2.08	8.96E-03
GLRA2	-5.81	1.09E-04
ADRA2A	-1.48	4.64E-02
ALOX5	-4.64	2.56E-03
TYR	-9.02	2.69E-02
PAXIP1	1.09	2.42E-02
ACHE	-3.5	8.95E-05
SOX21	-4.68	8.91E-03
PDZD2	-2.04	3.88E-04
SCN11A	2.96	4.05E-03
AIRE	-6.56	4.44E-04
ARL13A	-11.3	1.21E-02
CDK18	-1	3.25E-02
CD300LG	-2.46	8.92E-03
PIK3CB	1.39	4.93E-02
KLLN	-4.8	4.89E-04
ZNF235	-1.03	2.07E-02
SBSN	-4.18	7.66E-04
LYL1	-2.77	5.86E-03
C1H9orf169	-2.83	2.09E-03
TCF24	-3.03	3.41E-03
GPR116	1.19	3.42E-02
STC2	-1.62	1.12E-03
MIR664	13.94	1.43E-05
SHROOM1	1.49	2.51E-02
TJP3	-2.13	1.15E-03
FBXO43	2.19	7.09E-03
TGFBR3L	-4.41	1.18E-03
PRR19	-1.89	4.61E-02
FABP7	1.29	2.80E-02
IL12RB2	-4.59	6.76E-04
CCDC64B	-2.62	1.04E-04
EXTL1	-3.18	1.27E-04
TMOD4	-3.98	9.56E-04
PIANP	-2.79	2.01E-03
LRRC56	-2.46	1.47E-02
RNASEL	-1.38	4.86E-02
MSTN	-6.34	7.28E-04
ADH4	-9.18	2.45E-02
FOSL1	-6.2	5.85E-04
PPP1R14C	-2.28	9.73E-03
FSCN2	-1.36	6.16E-03
TMEM221	1.04	1.47E-02
GREB1L	-2.48	1.41E-03
LAG3	-3.32	2.05E-04
SH2D4A	-1.46	1.42E-02
MSLN	-3.75	1.26E-03
ADAMTS4	-1.25	5.74E-03
TSPAN1	-2.68	5.16E-03
ANGPTL7	-2.63	8.85E-03
LRP11	-2.16	1.85E-03
DUOXA1	-3.77	2.28E-04
LYST	1.14	4.44E-02
RHAG	-5.87	3.94E-03
ADM5	-2.64	9.35E-03
UHRF1BP1	1.19	4.87E-02
ACP5	13.7	1.86E-06
GPR114	-2.46	3.21E-04
TMEM95	-2.29	3.20E-03
C14H22orf31	-10.87	2.16E-02
GYLTL1B	-1.34	8.28E-04
THNSL1	-1.36	3.76E-02
IGSF9B	-2.81	2.27E-03
PPCDC	1.4	3.33E-02
USP2	-1.63	5.16E-03
PFN4	-4.74	2.32E-04
AATK	-4.52	9.81E-05
TMEM104	-3.26	2.56E-04
MCTS1	-1.75	3.64E-02
STEAP4	-5.3	4.21E-04
SLC2A6	-1.57	1.47E-02
MBOAT4	-9.47	2.01E-02
SLC16A11	-6.19	1.26E-03
AIF1	1.52	1.45E-02
GPR64	-3.37	7.96E-04
FZD9	-5.12	1.15E-04
QPCT	9.99	4.86E-02
MXD1	-1.52	5.17E-03
HSD17B1	-2.38	1.97E-03
CD274	-3	2.70E-03
IGFBP3	-2.27	1.30E-02
PLEKHA7	-1.03	1.42E-02
HHATL	-7.24	2.82E-04
S100A12	-1.98	3.54E-03
EID2	1.98	4.49E-02
FAM65C	-1.71	6.89E-03
ZBED6	3.2	8.46E-03
IL1RAP	1.72	8.91E-03
TMEM139	-2.7	9.57E-04
OTUD1	1.25	2.76E-02
CXCR5	-7.43	1.26E-03
VTCN1	-2.22	4.71E-04
MERTK	1.28	2.36E-02
LRRC49	2.22	4.24E-03
REP15	-2.77	3.22E-03
MOCS1	-1.48	1.03E-02
AGER	-4.42	8.68E-04
ITGAE	-4.94	3.77E-05
WDR25	-1.5	7.72E-03
ADA	-2.71	8.43E-05
MYBL1	3.2	9.30E-04
TSNAXIP1	-3.58	6.26E-04
SSH2	1.69	2.59E-02
PDPN	1.87	1.89E-02
BCL6	-1.35	1.94E-02
NCOA6	1.17	2.15E-02
CHIA	-9.31	2.48E-02
TXLNB	-5.91	1.78E-04
SLC28A3	-7.17	2.93E-04
GPN2	1.3	1.70E-02
FAM83A	-3.94	1.45E-04
ENPP2	2	7.45E-03
CCDC176	-5.1	1.10E-03
AARD	-3.53	6.07E-05
PLB1	-2.28	4.68E-03
LYZ	-3.14	1.92E-02
FPGS	-1.28	9.86E-03
SYTL3	-4.28	2.18E-04
C12H17orf66	-8.86	3.15E-02
BTBD17	-7.21	1.27E-04
SETD1A	-1.8	1.82E-04
MIR1271	14.1	2.20E-05
ZNF180	1.85	2.04E-02
MYLK	-1.3	1.19E-02
EPS8L1	-4.99	9.86E-05
PDE4DIP	-1.82	2.37E-03
ITK	-5.71	1.83E-03
COBLL1	-2	5.68E-03
CCDC171	1.54	4.25E-02
PMAIP1	2.18	2.42E-03
GLIS1	3.59	5.55E-05
GPR18	-9.56	1.74E-02
SALL1	2.85	7.28E-03
FARP2	-1.86	3.32E-02
CDKL1	-1.88	5.35E-03
ABLIM3	-2.89	2.74E-04
TBC1D30	1.92	1.05E-02
TSGA13	-8.33	4.89E-02
C14H22orf15	-8.24	4.02E-02
CYP2A19	-1.42	2.67E-02
GLDC	2.11	1.53E-02
CTBS	-9.18	2.86E-02
IRF5	-5.6	4.80E-07
LRRN2	1.34	4.87E-02
NRCAM	1.38	1.14E-02
ME1	2.03	4.29E-02
MYH1	-5.84	1.67E-05
HPS6	1.32	2.52E-02
MYOM1	-3.49	5.57E-04
GBP6	-6.95	1.00E-05
WNT3	-1.21	3.13E-03
PITPNM2	-2.71	3.07E-04
CES1	-2.24	1.86E-02
GAREML	-2.85	1.65E-05
SUN1	-3.6	1.89E-04
ZFP37	2.25	1.45E-02
RBM46	1.46	1.76E-02
PHOX2A	-4.32	5.33E-03
PPPDE2	1.88	1.37E-02
CCDC110	-5.84	3.35E-04
MYO1F	-3.68	2.63E-04
SMG9	-1.74	3.01E-04
EYA2	-1.85	1.50E-02
BMP5	1.36	2.50E-02
SCN8A	-2.94	4.15E-04
S100G	-2.87	2.47E-02
PLLP	-3.8	1.18E-03
FAAH2	-1.51	2.29E-02
BVES	1.72	3.18E-02
GTSF1L	-14.89	2.29E-08
RAB30	1.59	1.53E-02
SPINK5	-3.63	1.08E-03
CACNA2D2	-1.14	9.80E-03
SLC4A11	-3.94	2.84E-04
GRIK1	1.64	4.50E-02
RUNDC3B	-2.87	8.05E-04
IL-5	-4.21	1.60E-02
DCLRE1A	1.73	1.88E-02
LPAR5	-5.05	2.62E-05
ENO4	-4.81	5.07E-04
TMEM87B	1.34	4.67E-02
SLC8A2	1.45	6.21E-03
C15H2orf54	-2.71	1.23E-03
GUCY1A2	1.84	8.74E-03
DIO1	-11.94	8.19E-03
CHIC1	1.2	3.93E-02
FAM185A	1.47	2.43E-02
SLC10A6	-1.45	2.81E-03
KRBA2	-1.69	1.91E-02
UNC5A	-5.24	3.16E-05
ITGB7	-4.84	4.01E-05
NOXRED1	-3.84	3.27E-03
CD72	-3.72	1.14E-03
C17H20orf96	1.64	1.85E-02
1-Mar	-4.42	1.80E-05
CTSW	-5.36	1.47E-03
TREX1	-2.05	2.30E-02
KCNH1	-2.07	2.34E-02
RUNDC3A	-1.01	3.27E-02
FABP2	-11.7	1.34E-02
SIK1	-1	8.91E-03
THBD	-1.57	1.45E-03
MCMDC2	-4.77	2.41E-03
MMP3	-2.85	6.26E-04
KIAA1239	-6.83	5.59E-05
FAM221B	-2.66	5.67E-04
CGN	-1.34	3.90E-03
ARMC5	-1.64	2.25E-02
WDR27	1.08	4.95E-02
TMPRSS15	-5.98	1.35E-04
CCDC88C	-1.02	9.21E-03
ENPP5	1.21	3.93E-02
CCDC173	-1.68	1.74E-02
CPSF4L	-4.71	1.35E-06
SV2A	-2.75	3.52E-03
OSAP	1.53	2.86E-02
PHLDA2	-2.12	2.46E-02
KCNA3	1.91	2.89E-03
NHEJ1	1.18	1.93E-02
SNTB1	-2.79	3.55E-04
PRSS53	-3.51	6.67E-04
IMPA2	-1.06	4.16E-03
TPCN1	-1.01	1.67E-02
TRPV6	-5.06	4.07E-04
FAM160A1	-1.06	2.11E-02
RPS6KA6	2.07	2.78E-02
ECT2L	-4.62	1.59E-05
NMRK2	-8.37	4.59E-02
ICA1	1.82	3.08E-02
SLFN11	3.23	2.37E-03
IRAK4	1.86	1.17E-02
XRRA1	-3.06	3.99E-04
JHDM1D	1.41	3.13E-02
SIPA1L2	-1.22	1.80E-02
PEAK1	1.68	6.47E-03
TMPRSS9	-7.4	6.85E-04
SLC25A47	-3.65	2.52E-04
TMOD2	2.35	4.90E-03
AMPD3	-2.38	1.20E-03
ZNF200	2.04	2.30E-02
ABCB1	2.17	1.07E-03
EPB42	-6.04	1.19E-04
CEP89	1.19	1.73E-02
CHRM4	-5.91	9.01E-04
CCNE1	1.31	3.51E-02
RET	2.15	7.24E-03
CNTN1	1.35	1.63E-02
PYCARD	-3.75	2.04E-03
C3H2orf44	-1	3.49E-02
CACNA1D	1.7	6.08E-03
SOCS1	-1.83	8.14E-03
ACTN2	-3.97	7.54E-05
IAPP	-11.71	1.35E-02
DRAXIN	1.58	7.43E-04
PLEKHH2	1.73	1.19E-02
NOXO1	-5.19	1.71E-04
C9H11orf30	2.1	1.18E-02
NRTN	-3.37	3.15E-02
DGKE	1.26	2.83E-02
GPRC6A	-6.64	2.20E-04
C6H19orf81	-3.53	1.00E-03
MSRA	1.13	2.00E-02
TIFA	-1.64	9.34E-03
SPIRE2	-1.6	1.41E-03
WDR93	-3.74	1.44E-03
PRKAG2	-1.66	2.70E-03
SLC4A4	1.64	1.14E-02
ZNF786	1.27	1.71E-02
VSIG2	-5.45	1.08E-04
C4H1orf56	-5.36	8.10E-06
ALOX5AP	1.76	3.56E-02
CNR1	1.55	1.78E-02
GPAT2	-7.33	1.01E-04
MAP7D2	-1.79	3.69E-03
RFX7	1.61	3.77E-02
CEP152	1.17	4.13E-02
RNF207	-5.94	1.23E-05
DCT	2.19	2.25E-02
SPINK9	-14.83	3.04E-06
FITM1	-4.93	3.35E-04
TIMP-4	-3.47	1.02E-02
PDK3	2.55	3.39E-02
PTBP2	2.37	3.03E-02
DOCK11	1.56	1.75E-02
ZNF565	-1.56	4.60E-03
ZNF33B	3.11	1.14E-02
FAM184B	-4.31	1.81E-04
GFOD1	-1.67	2.88E-03
TNFSF9	-2.21	1.65E-03
TCP11L2	2.04	1.46E-02
KRT25	-4.76	2.74E-04
SAMD15	-3.26	1.77E-03
PRSS54	-9.13	3.27E-02
KCNQ5	-1.74	8.13E-03
PM20D2	1.8	4.99E-03
MAP10	1.32	2.67E-02
SLC25A35	-4.49	1.25E-04
ANKRD35	-1.1	6.12E-03
MYOT	-6.43	2.37E-04
ZSWIM4	-1.73	2.05E-03
ANGPTL6	-1.65	1.17E-02
MESDC1	1.54	2.75E-03
B4GALT6	2.43	2.11E-02
FAM122B	1.01	4.39E-02
ZFHX4	1.11	2.15E-02
TMLHE	1.58	3.62E-02
NAB2	-2.42	9.16E-04
MOGAT2	-11.68	1.90E-02
ICA1L	-4.54	7.08E-05
USP49	-1.52	7.67E-03
MYL3	-4.89	1.77E-04
EPSTI1	1.77	4.27E-02
GSTO2	-3.92	1.36E-02
C13H3orf18	1.06	3.49E-02
C12H17orf72	-5.93	8.49E-04
LSM11	1.66	1.44E-02
KLF8	1.51	1.20E-02
TMPRSS5	-5.97	2.43E-04
TMEM255A	-5.02	1.01E-04
LCA5L	-6.07	2.32E-04
LRRC29	-2.99	7.34E-04
LRRC8E	-1.81	1.52E-03
RASGRP4	-6.49	3.15E-05
BCKDHA	-1.03	2.99E-02
MYH7B	-2.64	6.72E-05
SOHLH2	1.37	1.85E-02
BEST4	-10.57	8.89E-03
CHST9	3.4	1.17E-02
ANO1	-1.14	1.79E-02
CST7	-5.73	6.70E-04
CFI	2.15	4.15E-02
ADAMTS18	-2.15	2.31E-02
HAS1	-6.04	1.46E-04
FRS3	-3.73	7.77E-04
TP53INP2	-3.59	6.46E-04
TMPRSS11A	-4.18	3.88E-04
AMZ1	-5.78	5.26E-03
CARD10	-1.55	1.18E-02
HRC	-4.55	4.50E-04
MIR1839	14.47	3.01E-05
GPR162	-4.1	4.66E-05
LURAP1L	-1.47	7.90E-03
SPEF1	-2.59	2.49E-04
CCL25	-2.96	9.69E-05
HOOK1	1.81	7.37E-03
TPP1	-2.2	4.14E-04
SESTD1	1.39	1.23E-02
C2H11orf35	-4.74	5.41E-06
PENK	-3.27	8.44E-04
LHB	-2.99	3.11E-04
NUDT12	2.49	4.86E-02
SERPIND1	-9.2	2.98E-02
GNAT3	-7.49	4.63E-02
KIAA1377	2.02	3.67E-02
SORCS3	3.04	2.87E-03
RXFP4	-9.5	2.28E-02
FABP6	-9.21	3.18E-02
ZBTB6	2.68	9.15E-03
ADAMTS15	-1.73	4.09E-03
LRRC3B	1.27	4.52E-02
P2RY1	1.34	1.70E-02
CASC3	-1.19	7.00E-03
CCRN4L	-2.41	5.20E-03
KCTD18	1.13	2.77E-02
MYADM	-1.7	6.08E-03
CCDC15	1.64	1.82E-02
IFIT1	-1.87	2.13E-02
ZMYM3	1.28	1.64E-02
THBS3	-1.69	2.97E-03
FRS2	1.6	1.42E-02
MIXL1	-4.65	6.25E-04
ELL3	-2.56	1.12E-02
RTDR1	-12.35	7.17E-03
DLEC1	-4.94	1.13E-04
MIR17	14.47	8.83E-06
CCRL1	-3.03	1.46E-03
CAND1	2.59	5.22E-03
ARL11	-5.57	1.88E-03
KCNT2	2.13	6.57E-03
WASF2	1.33	1.30E-02
TC2N	2.12	2.80E-02
CCDC42B	-7.82	1.21E-04
WNT11	2.34	1.32E-02
SMPDL3B	-4.18	1.30E-03
MANSC4	-1.5	9.50E-03
TMEM215	-2.02	5.77E-03
ZNF777	-1.23	1.71E-02
TRNAR-ACG	12.29	6.09E-06
TMEM154	-1.49	1.98E-02
SUPT20H	-6.79	1.63E-04
GPR63	1.04	3.09E-02
SHQ1	1.13	4.81E-02
CLDN17	14.31	1.84E-06
SVOPL	-6.86	2.50E-04
VMO1	-1.72	7.07E-03
MCCD1	-7.08	1.21E-04
SLITRK2	1.87	2.17E-03
GPAT	1.51	2.21E-02
IL18BP	-2.37	1.07E-03
HSPB2	-2.65	7.85E-05
CCDC74B	-5.91	2.34E-04
SLC4A9	-4.75	4.49E-05
SCAND3	1.97	4.12E-02
CYFIP2	1.42	1.95E-02
MKL1	-1.55	8.22E-04
IFN-DELTA-3	-14.54	2.95E-05
TRIM36	2.04	1.92E-02
PLCE1	1.1	1.93E-02
ZBTB4	-2.02	7.53E-04
IGFALS	-3.07	4.77E-05
IFFO1	-1.76	5.66E-05
SNCA	-2.61	2.22E-03
HIGD1B	-5.81	1.74E-04
LGI4	-1.92	4.15E-04
MRAP2	3.42	3.05E-03
TMEM74	-3.63	6.30E-04
HPSE	-4.86	2.70E-04
C17H20orf194	1.65	3.36E-03
IFN-DELTA-7	-14.17	2.81E-05
RLN	-4.48	4.08E-03
GLCCI1	1.7	1.62E-02
NFXL1	1.08	2.35E-02
MTERF	2.59	1.24E-02
PTPN21	-1.27	1.61E-02
C5H12orf66	-2	9.55E-03
FNDC9	-6.96	8.82E-05
NRGN	-2.97	2.08E-04
BOC	-1.28	1.55E-02
LONRF2	1.07	5.00E-02
SYCE1L	-1.39	1.91E-02
TRIM62	1.36	4.80E-02
ERCC6L	1.46	4.09E-02
GNAO1	-2.82	3.65E-04
MED26	-1.91	2.26E-03
CLDN8	-1.63	9.19E-03
HS3ST5	-2.63	5.55E-03
TBC1D8B	3.15	3.54E-02
GPR126	1.42	4.67E-02
CDC6	1.48	1.54E-02
FOXQ1	-6.14	1.67E-04
PIGA	1.37	1.76E-02
WDR60	-1.09	1.67E-02
AWAT2	-12.32	1.23E-02
LMOD3	-4.65	5.97E-05
ELOVL4	1.7	1.34E-02
SLC35E3	2.73	2.67E-02
LOXL4	-2.48	3.91E-04
ITGA8	2.1	5.09E-03
GRIP1	1.14	2.61E-02
STS	-5.23	1.15E-06
NT5M	-2.17	5.64E-03
AKT1S1	-1.33	5.67E-03
LRP8	1.32	6.55E-03
LDLRAD4	-1.22	7.54E-03
MYBPH	-5.73	3.79E-05
GJC3	-11.85	1.36E-02
TM4SF20	-9.9	1.47E-02
GPR183	-6.31	6.30E-04
ATF7IP2	2.52	1.75E-02
RAX2	-9.89	1.70E-02
MYH7	-4.55	1.72E-04
MYL9	1.13	1.46E-02
ASCL3	-6.75	3.52E-04
CLC-2	-1.83	4.72E-04
HUNK	1.4	1.63E-02
C9H11orf71	-2.61	6.90E-04
WNT2B	-4.03	8.49E-05
LPAR3	3.07	1.43E-02
CABYR	-3.53	1.94E-04
RGS7BP	-2.33	7.68E-03
IRF8	-2.6	3.66E-03
DLX4	2.39	6.13E-03
PET112	-1.26	2.23E-02
DPP10	1.46	3.38E-02
ZNF34	1.28	4.65E-02
A3GALT2	-11.9	1.81E-02
GBP7	-7.32	1.89E-06
NPFF	-3.59	8.67E-04
NAALADL1	-4.75	3.49E-05
HDHD1	1.06	2.15E-02
CXHXorf23	1.75	7.00E-03
BAZ2A	-1.16	7.51E-03
FAM188B	-1.6	1.92E-04
RBM41	2.47	5.95E-03
CCL19	-5.33	5.18E-05
EPHA1	-1.14	8.62E-03
MYH14	1.07	1.12E-02
SNX16	1.83	2.79E-02
LRRN1	-2.02	3.12E-03
SH2B1	-1.39	4.04E-03
HAUS8	1.27	3.54E-02
CAV2	1.41	3.99E-02
PRICKLE3	-1.96	9.47E-04
NOTCH4	-3.04	3.76E-04
SPRP	-6.94	6.43E-04
MFRP	-6.52	2.60E-04
LENG9	-3.13	8.60E-05
TRNAS-UGA	14.83	1.46E-08
ITGB8	1.26	3.77E-02
BARX2	-4.65	1.08E-05
MDM1	2.04	1.53E-02
RIC3	-1.39	5.68E-03
FAM129C	-1.91	5.28E-03
SUMO4	-11.83	1.54E-02
CDH10	1.62	3.42E-02
OTUD7A	-3.85	1.66E-04
RND2	-1	1.17E-02
IQCD	-1.7	5.77E-03
KDM8	-1.08	2.31E-02
NAT8	-7.84	4.16E-04
TUBD1	1.61	3.13E-02
FAM101A	-1.26	3.11E-03
CPLX4	10.97	4.26E-02
FAM65A	-3.87	1.88E-06
CAMKV	-5.36	4.44E-04
GAS1	-2.92	7.92E-04
MFSD12	-1.15	6.69E-03
ZNF510	-1.45	3.15E-02
SLC15A2	-3.54	5.63E-04
LRCH2	1.97	1.18E-02
ZNF630	1.33	4.07E-02
FAM81A	1.63	2.31E-02
MYBPC1	-3.76	5.70E-04
C16H5orf28	3.09	1.61E-02
TRMU	-1.44	5.09E-03
C4H8orf47	-2.6	3.31E-03
SLC25A19	-1.84	5.01E-03
PAQR6	-2.97	6.10E-04
PDLIM3	-2.34	7.38E-03
WDR4	-1.39	4.01E-03
SLC35G2	-6.99	2.41E-03
SERTAD4	-1.3	3.60E-02
VILL	-1.71	3.70E-03
ARMC7	-2.68	2.44E-04
PPP1R21	1.97	4.12E-02
GALNS	-1.14	2.14E-02
TIGD7	-1.28	2.01E-02
PLCB4	2.53	8.35E-03
ABCC1	1.53	1.49E-03
GZMK	-3.46	2.55E-03
CHST2	1.05	1.29E-02
KLF5	-1.24	2.40E-02
IFN-ALPHA-4	-11.94	1.58E-02
BCAT1	2.57	5.60E-03
CAMK4	2.18	4.81E-02
BAIAP2L1	-2.2	8.81E-04
CRISPLD2	2.05	1.54E-02
TTC26	1.63	2.22E-02
GBP5	-6.21	1.30E-04
DEPDC1B	2.03	8.18E-03
CAMK2N2	-10.52	9.76E-03
ADAMTS7	-1.03	1.50E-03
CALY	-5.06	1.33E-04
NKAP	1.09	2.44E-02
DRAM1	-2.98	3.51E-03
USP51	-3.09	6.29E-04
FMO5	-2.73	2.94E-03
CHCHD10	1.46	9.15E-03
SLC35G1	1.69	1.86E-02
CDH7	1.75	1.59E-02
TMEM35	2.21	8.53E-03
HPGDS	-10.21	1.34E-02
POM121C	-3.24	7.04E-04
ICAM3	-1.32	4.47E-02
AXDND1	-2.96	8.56E-04
NMT2	-4.19	3.98E-05
TCEANC2	1.28	3.07E-02
RAD54B	1.56	2.29E-02
BCAR3	-1.36	6.80E-03
PITPNM1	-1.69	1.63E-03
AASS	1.59	1.25E-02
ATP6V1G2	-2.4	1.49E-03
SLC25A32	1.45	2.49E-02
RNF214	1.82	9.35E-03
KIAA1211	-1.46	2.62E-03
CDC25C	1.27	2.88E-02
RGS22	2.5	1.03E-02
CYP39A1	2.83	2.21E-02
ADAP1	-2.17	1.97E-03
LPIN3	-1.46	1.42E-03
ADAMTS12	1.39	1.27E-02
REST	2.34	3.62E-03
OSBPL10	-1.46	1.08E-03
USP45	1.31	2.22E-02
MIRLET7A-1	14.96	3.86E-06
TMEM59L	1.09	1.21E-03
ARMC8	1.72	1.37E-02
CNOT3	-1.69	1.37E-03
OPN1SW	-6.88	2.41E-04
CCDC18	1.73	2.98E-02
GRIA3	1.7	4.10E-02
SBSPON	2.61	9.43E-03
PPP1R18	-1.33	4.52E-03
DCHS1	1.02	4.76E-02
PTPRJ	1.12	2.07E-02
PLD5	2.94	2.22E-03
BAG4	1.32	1.98E-02
FASTKD5	1.27	4.18E-02
ZC3H6	1.38	2.13E-02
FANCB	2.58	1.21E-02
TTC23	1.13	4.10E-02
FBXO42	1.3	3.62E-02
FUT2	-1.31	1.76E-02
GCOM1	-2.82	4.42E-03
SLC12A1	-7.22	3.71E-04
TSPAN7	1.53	8.40E-03
PLEKHG6	-4.01	4.24E-05
POLK	1.06	3.81E-02
CHML	1.53	1.44E-02
ZCWPW1	-4.09	8.99E-04
LINS	1.83	4.34E-02
FOXN2	2.67	3.28E-03
ST3GAL6	1.69	3.26E-02
PPFIA2	-3	9.07E-04
ADAM15	-1.05	3.95E-02
TMEM40	-1.31	4.09E-02
BRWD3	1.33	4.55E-02
FCHO2	1.38	3.24E-02
GREM1	1.65	1.81E-02
NARG2	1.89	1.64E-02
COL22A1	1.33	3.44E-02
FANCM	2.34	4.68E-03
RBAK	1.61	1.05E-02
PLD1	1.38	2.29E-02
PDE10A	-2.2	3.31E-03
LIPI	-4.23	1.01E-03
NTN4	1.17	2.53E-02
ANKRD61	-12.72	7.97E-03
C7H14orf79	-2.66	2.91E-04
STX2	1.81	4.20E-02
SCUBE1	1.89	1.53E-03
C1H9orf131	-8.32	3.16E-04
UPP2	-10.51	6.93E-03
C16H5orf54	1.46	3.05E-02
ZNF598	-1.46	3.47E-03
CREB5	-1.82	4.26E-03
ANKRD44	1.93	9.18E-03
ZNF362	-1.21	3.97E-03
ZNF585A	2.28	1.06E-02
SERINC5	1.49	3.38E-02
GPD1	-2.25	5.39E-04
EXOC6	-2.08	1.80E-02
ZNF287	1.05	4.47E-02
BCL3	-4.69	2.17E-05
BPIFB4	-4.81	2.60E-04
KRT27	-7.05	9.30E-04
DNAH9	-3.06	1.56E-04
CBLB	1.5	1.38E-02
TMEM120B	-2.86	8.36E-05
DAAM2	-1.65	1.67E-03
PDE6C	-6.95	1.56E-05
MIR143	13.07	5.28E-08
RAB3A	-2.21	3.60E-02
CNNM4	1	8.49E-03
SMPD1	-1.42	1.87E-03
FAM132A	1.93	2.78E-02
GCNT7	-7.23	1.28E-04
CREBRF	1.58	3.02E-02
TSPAN4	-3.3	2.61E-04
FAM102B	1.63	8.40E-03
LHCGR	-10.23	1.43E-02
ACPT	-1.62	8.72E-03
PTGDR2	-4.82	2.63E-04
KBTBD8	-2.19	6.14E-03
P2RY14	-5.84	1.75E-04
ALG8	2.06	1.07E-02
CNN1	-1.49	7.42E-03
TACR2	-10.16	1.88E-02
CAMTA2	-3.16	1.13E-03
KATNB1	-1.22	4.79E-03
DAPP1	-6.06	1.56E-04
ZNF605	1.3	2.83E-02
EDARADD	-1.15	4.09E-02
LRIG2	1.57	2.42E-02
MPL	-12.92	4.58E-03
SUPT3H	2.86	1.58E-02
SBNO2	-2.05	3.66E-04
ARHGAP26	1.01	1.01E-02
SERPINE3	-12.98	3.89E-03
NKAIN2	-3.51	2.97E-04
MFSD8	1.19	3.53E-02
DCLRE1C	-1.91	7.86E-03
GGA3	-1.12	2.25E-03
CCDC142	-1.14	9.22E-03
PARPBP	2.28	1.80E-02
LRR1	1.33	2.20E-02
HELB	1.11	3.32E-02
PTGES2	-1.59	1.92E-02
GHR	1.69	2.08E-02
TTC32	-3.18	1.44E-03
CNBD2	-4.86	5.75E-04
GCLM	1.87	1.04E-02
LYPD6	2.67	1.84E-03
RNF103	2.65	1.29E-02
C1QTNF7	-1.22	4.57E-02
SPAG4	-5.86	1.83E-04
DIAPH1	-1.2	2.69E-03
BCL6B	-1.15	1.76E-02
TNIP2	-2	3.63E-03
CHST13	-5.96	1.04E-04
MANEA	2.55	5.55E-03
ZNF394	-2.05	3.11E-04
TRAF6	1.74	3.60E-02
SIGIRR	-3.2	9.17E-04
TTC21B	1.31	3.10E-02
STK17B	1.98	1.79E-02
[truncated: 2,563 more rows]
