# Supplementary material for: Integrated Analysis of LncRNA-mRNA Coexpression in the Extracellular Matrix of Developing Deciduous Teeth in Miniature Pigs
Source: Biomed Res Int. 2019 Jan 23;2019:6159490. doi: 10.1155/2019/6159490 (PMC6364112; doi:10.1155/2019/6159490)
Supplement: Supplementary Materials — Supplementary Table 1: the identified differentially expressed genes during the deciduous tooth germ transition from the cap stage to bell stage (E40 to E50) (XLS 100 kb). Supplementary Table 2: the identified differentially expressed genes during the deciduous tooth germ transition from the early bell stage to late bell stage (E50 to E60) (XLS 71kb). Supplementary Table 3: the identified differentially expressed lncRNAs during the deciduous tooth germ transition from the cap stage to the early bell stage (E40 to E50) (XLS 211kb). Supplementary Table 4: the identified differentially expressed lncRNAs during the deciduous tooth germ transition from the early bell stage to the late bell stage (E50 to E60) (XLS 626 kb). Supplementary Table 5: the significantly enriched KEGG pathways associated with the grouped DEGs (XLS 169kb). Supplementary Table 6: the expression changes of the ECM pathway genes from E40 to E50 and from E50 to E60 (XLS 11kb). Supplementary Table 7: the miRNA-target lncRNA and mRNA regulatory interactions of the ECM pathway (XLS 27kb). Supplementary Table 8: lncRNA and mRNA colocation analysis of the ECM pathway genes (XLS 30kb). Supplementary Figures: the developmental morphology of tooth germs at key development stages E40, E50, and E60 (Supplementary Figure 1). The coexpressed analysis of ECM genes and lncRNAs (Supplementary Figure 2) (DOCX 15mb). [file 6159490.f1.zip › Supplementary materials/Supplementary Table 2.xls]

DEGs	Log2Foldchange	pvalue
EGR4	-6.01	2.51E-04
BBS1	-5.93	5.16E-03
NPAS4	-6.22	4.44E-05
GATA4	-6.29	5.97E-04
TRIM6	-6.52	3.86E-05
RLIM	-6.61	1.34E-03
LRRC52	-6.84	1.71E-04
PLAGL2	-6.82	5.86E-04
KCNJ1	-6.8	1.11E-03
PTPRH	-6.73	4.89E-04
BARHL2	-6.97	1.62E-04
TBR1	-6.69	3.29E-03
CLEC7A	-6.66	1.45E-03
VSTM2B	-7.01	1.02E-03
SLC5A8	-6.88	1.30E-03
F7	-7.07	3.04E-05
4-Mar	-6.9	1.67E-03
CSF3	-7.2	1.46E-04
SLC22A13	-7.17	1.61E-04
CTSF	-7.14	2.50E-04
TTLL7	-7.23	1.09E-03
LEP	-7.21	7.86E-04
AKR1E2	-7.25	9.20E-04
SERPINA4	-7.28	5.41E-04
FAM170B	-7.15	4.07E-04
FCRLB	-7.3	2.76E-05
DSCAML1	-7.21	4.51E-04
CHRNA9	-7.42	3.35E-06
KIAA2022	-7.49	1.30E-03
SYN3	-7.36	2.01E-03
AQP6	-7.44	2.60E-05
IL28B	-7.49	9.81E-04
GJB1	-7.55	1.27E-04
GPR26	-7.19	7.43E-03
KRT82	-7.51	7.13E-04
ONECUT1	-7.64	1.70E-04
ASIC2	-7.48	9.24E-04
CXHXorf48	-7.71	1.19E-04
SLAMF7	-7.36	1.08E-03
ADAM5	-7.67	1.74E-03
NOX5	-7.34	5.84E-03
CHRNA5	-7.71	2.99E-06
DDO	-7.66	2.38E-05
C15H2orf66	-7.75	3.71E-04
LHFPL4	-7.71	1.29E-04
AVPR2	-7.6	5.81E-04
DLK1	-7.72	1.41E-03
ATP8B4	-7.74	1.58E-03
DARC	-7.7	3.27E-04
LHX2	-7.61	1.51E-03
IL20	-8.03	1.06E-04
DRC1	-7.8	3.39E-03
PRR22	-8.02	2.65E-06
CART	-7.98	2.11E-05
GALR3	-8.07	1.58E-04
UHRF2	-8.07	7.88E-04
OPTC	-7.95	3.81E-03
TBX19	-8.09	7.81E-04
ASAH2B	-8.08	3.96E-04
IQCF1	-8.1	1.23E-03
IL2RB	-8.2	2.14E-04
C3H2orf70	-8.12	2.00E-05
ENTHD1	-8.04	8.32E-04
SFTA2	-8.19	7.53E-04
ASB4	-6.95	5.86E-05
AQP5	-8.17	3.83E-04
CD300C	-8.01	8.26E-04
GABRQ	-7.64	3.61E-03
VTN	-8.24	2.16E-04
PTI	-7.92	5.63E-03
TRIM58	-8.26	7.35E-04
ONECUT2	-8.06	1.05E-03
POU4F1	-8.32	4.85E-04
ERP27	-8.05	8.18E-04
CCDC172	-8.19	3.50E-03
HS3ST4	-8.38	5.86E-04
VNN2	-8.4	1.49E-04
NLRP5	-6.49	8.09E-04
TRIM63	-8.28	1.12E-03
GLIPR1L2	-8.06	7.53E-03
EYA4	-6.55	5.61E-03
TMEM202	-8.35	5.08E-04
DNMT3L	-8.48	3.02E-04
CEBPE	-8.41	3.57E-05
FUCT1	-8.52	4.29E-05
SLC18A3	-8.15	2.25E-03
FAM179A	-8.33	7.36E-04
PFKFB1	-8.18	3.37E-03
ACTL8	-8.21	2.20E-03
NOL11	-8.31	2.19E-03
TNFRSF4	-8.59	3.10E-05
IL21R	-7.05	2.96E-03
UGT1A6	-7.03	1.91E-03
CXCL2	-8.32	3.36E-03
A1CF	-8.48	3.66E-04
IHH	-7.03	2.62E-04
ATP10B	-7.36	5.31E-05
C14H10orf71	-7.07	6.14E-04
GPR148	-8.51	1.71E-03
GAL3ST1	-8.68	3.20E-04
OSCAR	-8.64	2.50E-03
GABRB3	-8.2	2.25E-03
SMOC2	-6.75	3.48E-05
ST6GALNAC1	-7.12	2.53E-04
OASL	-8.25	2.30E-03
TMEM236	-8.34	6.35E-03
REXO1	-6.37	8.51E-03
KLK15	-8.8	2.74E-04
PSTPIP2	-8.76	1.10E-03
ALOX15B	3.44	2.80E-03
CXHXorf58	-8.81	1.15E-03
PAQR8	-7.89	6.59E-04
PSMB8	-8.84	6.02E-04
IKZF3	-7.32	1.73E-03
KCTD3	-8.03	5.58E-04
C1H15orf43	-8.56	2.61E-03
TMEM233	-8.76	5.79E-04
NACAD	-8.13	4.34E-05
IL1R2	-8.95	2.61E-04
MLC1	-7.73	3.24E-04
MC4R	-7.82	1.14E-04
RAB3B	-8.88	6.31E-04
DNAJC22	-8.99	3.03E-04
OTOG	2.65	3.58E-02
DIRAS1	-8.97	4.89E-05
P2RY10	-8.76	2.94E-03
PLA2G4E	-8.9	6.44E-04
ABCA6	-8.99	1.57E-03
ATP2B3	-7.65	7.70E-06
ORM1	8.46	4.48E-02
GPR3	-7.26	1.10E-03
PTPRCAP	-9.01	2.90E-05
EML6	-8.22	3.33E-05
UCP3	3.77	9.36E-04
CD48	-9.11	3.97E-04
SLC9B2	-7.93	4.44E-04
BLK	-7.85	5.72E-04
C4BPB	-8.79	1.80E-03
INHA	-9.16	7.72E-05
LOXHD1	-7.33	1.72E-03
PRKCB	-9.14	2.34E-04
CCL8	-9.22	1.51E-04
RASGEF1C	-7.24	9.24E-04
GABARAP	-9.01	2.22E-03
BPI	-8.05	4.06E-05
HEPHL1	-9.26	1.27E-04
AK9	2.47	4.25E-03
DEPDC4	-9.2	9.48E-04
GYS2	-9.23	1.13E-07
SYCP2L	2.91	1.28E-03
IQCA1P1	-7.73	1.76E-03
FANCG	-7.63	4.20E-04
FABP1	-9.1	1.99E-04
FOXA1	-7.49	3.40E-03
NXPH4	-7.57	6.79E-04
TEKT3	-9.26	2.53E-04
RXFP3	-6.37	7.53E-03
CCR3	-7.54	1.55E-03
KRT32	-7.28	2.08E-03
SLC26A11	-6.28	1.65E-03
GLRA3	-9.39	2.52E-04
CSMD3	-8.02	2.61E-04
ASGR2	-7.88	1.99E-03
AMCF-II	-9.45	5.60E-05
HOXB3	-5.89	1.08E-03
CATSPER4	-7.66	8.60E-04
B2M	-9.33	2.36E-03
RAMP3	-9.38	1.58E-03
ALDH3A1	-9.28	1.18E-03
ATOH7	-9.35	1.03E-04
PIPOX	-7.84	3.15E-03
ZIC4	-6.34	2.14E-04
CCR1	-8.98	5.40E-06
UBE2U	-9.52	3.52E-04
RNF148	-8.29	1.29E-03
FCAR	11	2.00E-05
ZNF804B	-9.19	1.50E-03
PLA2G2F	-9.53	2.06E-05
UCHL5	-9.51	1.31E-03
SPATA31D1	-9.36	1.31E-04
PGLYRP2	-8.57	1.56E-04
GPR12	-8.6	2.62E-03
ESPNL	-8.87	1.07E-04
PDE1A	-7.06	2.58E-04
ATP12A	3.87	2.21E-02
OXTR	-6.51	3.88E-05
FCRL3	2.81	3.00E-02
CYP1A1	-7.51	3.54E-03
PDZK1IP1	-9.66	2.80E-04
AGTR1	-9.08	8.64E-05
ANKRD66	-7.33	1.40E-03
TSACC	-9.67	3.29E-04
MRPL55	-9.53	2.58E-04
C5AR1	-8.44	8.71E-03
CCL4	-9.72	6.45E-05
SCN3A	-8.92	4.73E-04
SST	-9.83	5.78E-05
APBB1IP	-8.04	4.16E-03
YIPF7	-8.39	1.79E-03
PRDM8	-9.17	6.31E-04
GPR88	-6.97	2.36E-03
UROC1	1.69	2.55E-02
ARL14	-9.84	2.55E-04
PPEF2	2.33	1.78E-02
MYT1L	2.07	7.44E-03
S100Z	-9.81	8.48E-04
SLA-5	-9.74	7.20E-05
GAB3	1.03	4.01E-02
PAH	-7.07	1.17E-03
NMUR1	3.67	3.00E-02
RASAL3	-9.8	5.78E-04
C7H14orf166B	-8.12	3.61E-06
ELOVL3	-8.76	1.12E-04
AMPD1	-8.52	3.11E-04
TMCO2	-9.87	2.63E-04
CHRNB2	1.18	2.17E-02
CBLN4	-8.17	7.64E-04
CPEB1	-8.09	1.20E-03
GRM4	3.41	1.30E-03
TNFRSF10B	-9.27	6.10E-05
KLHL1	-7.99	2.06E-05
TMEM82	-9.89	4.44E-04
LEMD1	-9.99	2.41E-05
CREB3L3	-7.45	3.24E-03
HYAL4	3.14	1.86E-03
RFX8	3.07	1.56E-02
MLPH	-9.95	5.96E-05
ZSWIM2	-6.84	8.16E-03
TRPM8	1.15	2.85E-02
TEX36	-9.98	5.96E-05
LAMP3	4.07	1.13E-02
LRP1B	-10.05	2.31E-05
WSCD2	-7.92	2.12E-05
SPAG16	-10.02	6.00E-06
SLC36A2	2.57	1.97E-02
XK	-7.99	9.65E-04
TMEM53	-9.14	4.73E-04
C7H15orf27	-9.32	1.89E-03
GLYAT	-7.93	1.62E-03
FAM181A	-9.04	1.30E-04
CASS4	-8.94	3.35E-04
HOXD3	-7.35	2.02E-03
IRG1	8.5	4.93E-02
FRMPD1	-9.41	9.28E-06
CCDC105	-7.95	1.17E-04
MPZ	2.91	1.74E-02
TNFRSF25	-10.19	6.66E-05
C5H12orf40	-8.96	5.08E-04
HORMAD1	-7.74	6.50E-03
PTPRO	-10.08	9.58E-04
LRTM2	-9.58	7.15E-06
ALB	-9.89	4.54E-04
DDC	-7.84	7.29E-04
EIF2S2	-10.21	2.89E-05
CYP2C32	-10.22	5.46E-04
CDH22	-9.51	9.60E-06
ASB11	-9.45	9.11E-08
GSDMA	-7.78	3.67E-04
C2H11orf91	-10.28	3.13E-04
ASB15	-9.89	7.24E-05
NCMAP	-9.43	5.55E-05
RFX2	-9.3	9.97E-04
BEND2	-10.06	2.15E-04
SLC38A3	-9.48	1.75E-03
LIN28B	-8.71	5.89E-04
KL	-9.23	3.67E-05
RDH12	-9.55	2.95E-05
C3H16orf89	-8.21	9.99E-04
HAVCR2	-10.03	2.45E-07
CDHR5	3.77	9.36E-04
GPR152	-6.97	3.17E-05
ROPN1	-10.45	1.07E-04
POPDC2	-9.53	5.18E-06
LEFTY2	5.4	3.47E-04
SPIB	-8.14	1.78E-05
SLC22A4	3.24	9.29E-03
CELSR3	-1.49	7.58E-03
CCR2	2.23	3.08E-02
PSD2	-9.7	3.36E-05
TULP4	-7.98	1.08E-04
HSD17B13	-9.74	9.78E-04
FAM19A3	-10.28	2.12E-04
ESRRG	-10	1.16E-05
LZTS1	-10.25	1.80E-06
HOXC13	2.91	3.57E-02
SLC34A2	3.88	1.86E-02
SLA-DRB5	4.41	1.62E-02
EREG	2.11	4.66E-02
CDNF	-8.86	1.81E-03
SLITRK3	3.45	3.50E-02
DNAI2	-8.61	4.00E-04
KCTD19	1.97	9.84E-04
SLC29A2	-7.94	3.77E-03
ZPBP2	-9.85	1.92E-03
CDKN2A	-8.22	1.93E-05
C13H21orf63	-9.58	1.48E-04
GPR6	11.75	7.38E-04
ASB18	-8.97	1.17E-04
PCDHB1	3.05	2.34E-02
OTOF	-8.47	5.43E-04
DOCK2	-9.03	1.04E-03
PRELP	2.3	4.20E-02
TDRD5	-10.03	7.87E-04
ADORA3	3.33	4.21E-02
CLCN1	1.5	3.73E-02
KCNJ11	2.31	2.83E-02
GRK7	2.5	3.74E-02
SLC22A14	3.09	2.83E-02
FOXJ1	-8.88	7.17E-05
SLC6A14	-10.17	2.37E-04
TFEB	-10.12	7.97E-05
GPR45	-10.17	2.94E-04
CCRL2	-10.23	4.16E-06
ALOXE3	4.5	1.57E-02
C1H9orf135	-10.76	9.61E-06
CD5	3.74	1.93E-02
LOR	9.37	4.16E-02
KIAA1210	-9.95	1.29E-04
OPRM1	-9.09	1.73E-04
ALDOB	-10.8	2.17E-05
STXBP5L	1.13	3.56E-02
VWC2L	-8.5	3.95E-04
KCNK15	-8.19	1.66E-04
NEFL	-9.26	4.39E-09
GREB1	-9.9	2.63E-07
GABRG2	3.4	2.87E-02
KIAA1549	-10.36	1.33E-04
ZIC1	-8.75	2.89E-06
ZNF488	3.84	3.63E-02
ZCCHC16	-7.99	1.04E-03
SPTBN5	3.37	1.28E-02
GALR1	4.01	5.04E-03
IL17F	-8.86	5.08E-04
CH25H	-9.81	1.64E-03
C13H3orf22	4.03	2.01E-02
LDLRAD1	-7.41	5.12E-04
PTCHD1	1.47	2.73E-02
RRH	-10.33	3.15E-04
TTC22	-8.46	9.96E-05
PIP5KL1	1.44	2.07E-02
CYP2C33	2.57	1.44E-02
DDX4	-10.3	2.63E-04
LRRC18	2.95	1.24E-02
RAC2	2.74	2.90E-02
L1CAM	1.42	1.11E-02
IL15	-10.94	7.01E-06
SLC15A5	9.55	3.49E-02
SARDH	2.24	7.38E-03
SPATA22	-10.92	3.68E-04
MIR30E	-10.96	4.17E-05
MIR34C	-10.96	4.17E-05
UGT1A10	-10.19	4.02E-06
C1QB	-10.43	1.43E-05
SULT1C4	-10	3.33E-05
MAN2B2	2.31	3.55E-03
SOWAHD	-10.94	8.51E-08
SLC6A3	3.19	1.27E-02
HIF3A	-10.08	9.62E-05
CCDC180	1.15	3.76E-02
COLEC11	1.69	2.55E-02
PTH	-9.39	1.29E-03
HRH1	-8.94	4.76E-03
FCHO1	-10.37	1.45E-05
BARHL1	3.57	4.69E-03
CLVS2	-8.5	2.67E-03
MCHR1	-8.76	8.98E-06
FAM196B	3.46	4.55E-02
RFX4	3.1	3.60E-03
ZBED2	-8.69	5.10E-04
PAX6	3.26	4.37E-02
CD4	3.43	1.21E-02
GOLT1A	-10.13	4.98E-05
POU6F2	2.28	4.25E-02
DUOX2	1.76	1.18E-02
PSAPL1	1.8	4.23E-02
DBH	2.74	1.98E-02
MSLNL	-9.57	1.24E-04
ANKRD63	1.05	3.78E-02
BPIFA2	-9.19	8.62E-04
FGF23	3.1	2.63E-02
ATP4A	-9.72	5.93E-05
ATP6V1G3	-10.49	5.67E-04
DUSP26	2.94	2.22E-02
IL1RAPL2	1.61	4.04E-02
CMAH	-10.41	2.90E-04
TRPV3	2.14	2.03E-02
CCL11	-10.45	4.81E-05
HSH2D	2.28	1.21E-02
ABLIM2	3.11	2.88E-03
REN	-9.43	1.18E-04
NOVA2	2.32	2.11E-02
COL6A6	-8.39	2.07E-03
NRL	-9.57	4.30E-05
MIR30C-1	-11.29	2.90E-04
WDR16	-9.87	8.08E-05
RIMS4	-10.17	4.81E-04
LECT1	-10.59	6.30E-06
TMEM86B	-10.42	3.79E-05
FAM78A	-9.64	9.88E-06
PILRA	2.13	2.19E-02
ECM1	1.38	2.80E-02
PPGRP-S	-10.48	5.15E-05
FAM92B	-8.15	2.53E-06
SPHKAP	1.36	1.96E-02
CD164L2	-10.28	1.19E-05
GADL1	-9.77	7.31E-04
TRABD2A	3.26	8.34E-03
RHBDF2	-1.27	4.10E-02
C2	3.1	4.24E-02
MUC1	-9.66	1.57E-05
MORN1	3.13	8.04E-03
VPREB3	2.59	8.81E-03
C4H1orf189	-10.41	4.89E-05
HBE1	-10.49	1.41E-05
CRIP3	-10.63	7.13E-06
TYRP1	9.35	4.52E-02
MUC20	-8.7	2.00E-03
RDH16	-9.51	4.95E-06
LGI1	2.09	3.77E-02
SLC4A1	3.19	1.32E-02
MYBPC2	1.51	6.63E-03
FMO1	1.07	3.17E-02
GC	8.59	4.68E-02
B4GALNT2	1.14	3.43E-02
CHRND	-7.95	1.94E-03
BMP15	11.67	3.00E-04
ADAD1	-11.08	2.91E-05
LMOD2	2.36	2.18E-02
MIR1306	-11.63	3.78E-05
ASPA	-10.2	4.76E-04
MIR148B	-11.63	5.08E-04
MIR128-1	-11.59	1.35E-04
TMEM145	1.53	1.82E-03
AR	2.61	3.74E-02
NTRK1	1.5	2.07E-02
C5H12orf60	3.56	4.37E-02
RADIL	2.76	1.04E-02
CSF1	1.88	1.87E-02
MIR193A	-11.49	9.91E-05
ELF4	1.44	2.52E-02
CRYGB	-10.63	9.99E-05
TMEM151A	2.17	3.08E-02
MYPN	2.9	6.32E-03
ICAM5	1.34	3.12E-02
ZDBF2	-1.67	1.91E-02
SCNN1D	1.88	4.21E-03
SYCP2	2.18	3.33E-02
TKTL2	-1.23	3.82E-02
PARVG	2.87	6.95E-03
GNRH2	2.58	2.88E-02
ARID3C	2.37	1.73E-02
ADCY4	-1.4	2.68E-02
CLCA1	4.75	9.88E-03
PLCG2	-1.26	4.52E-02
FAM163B	4.12	9.75E-04
TMEM211	12.81	1.27E-05
PGR	4.64	2.06E-02
GCS	2.23	3.45E-02
CPXM2	2.51	4.08E-05
GPR128	9.66	3.64E-02
TEKT1	-10.86	4.29E-05
NPW	-10.33	5.53E-03
FAIM3	4.02	9.26E-03
FAM3B	-10.24	8.96E-05
TEX12	-11.82	1.45E-04
IRAK2	-11.46	1.15E-04
KIAA1211L	2.66	1.24E-03
FNDC1	-1.28	3.09E-02
IL7	3.3	2.62E-02
WIPF3	2.75	2.20E-03
PCPA1	2.24	1.25E-02
ADAM29	10.43	2.17E-02
DIRAS2	-10.39	4.31E-06
NRROS	1.15	2.90E-02
MYOD1	-8.04	1.14E-04
B3GAT1	-10.99	7.98E-06
PLAC8L1	-9.6	4.71E-04
PLXNA2	1.17	2.11E-02
IQCA1	1.48	1.93E-02
MIR1343	-11.64	1.26E-03
ST6GALNAC-V	-11.63	1.60E-04
CR1	-2.19	4.24E-02
FAM154B	-10.77	5.17E-05
VWA3A	3.16	5.89E-03
MIA2	2.18	4.83E-02
ZNF385B	1.45	8.52E-03
SEL1L2	2.79	1.13E-02
K6-IRS1	4.57	6.11E-03
AMH	-9.04	2.83E-04
PADI1	1.34	1.40E-02
CRYBB1	-10.99	2.59E-04
SOST	3.21	1.04E-03
MIR130B	-11.96	3.21E-05
ASIC1	3.19	2.06E-02
DUSP27	1.69	2.92E-02
GRID1	1.17	4.96E-02
EPHB1	3.24	2.71E-03
PABPC1L	2.06	4.94E-02
LUZP2	-11.12	3.51E-04
KLRF1	12.47	1.37E-05
TAGLN3	-11.25	8.38E-06
GRIN2C	2.2	1.12E-04
MIR320	-11.82	1.56E-04
BHLHE22	2.62	3.03E-02
TMPRSS6	6.1	4.01E-03
FNDC8	9.93	4.65E-02
EBF2	-8.49	1.01E-04
PRSS45	-11.48	3.60E-05
GULO	3.59	1.24E-02
RNPC3	5.06	1.55E-02
BFSP1	1.86	4.68E-02
GDF10	3.47	3.64E-02
CNTN2	-1.28	2.46E-02
MASP1	2.32	1.04E-02
CYP1A2	10.38	3.54E-02
OTX2	3.6	3.61E-02
QRICH2	4.71	2.93E-03
PCSK6	-11.47	1.87E-04
CSMD2	-1.33	3.09E-02
NFATC1	-11.12	6.30E-05
NKX3-2	-9.03	4.29E-03
FOXP3	2.85	2.11E-02
FAM131B	1.44	5.37E-04
THEMIS2	1.54	6.24E-03
FAM71F2	1.27	1.78E-02
OTC	4.07	2.55E-03
TMPRSS2	-9.85	4.13E-04
SMC1B	3.63	1.03E-02
HTRA4	3.55	1.42E-02
CHRNE	1.71	2.67E-02
MYF5	-8.34	6.07E-04
PRRT2	-10.23	7.25E-04
HTR7	1.29	4.98E-02
DLK2	2.37	2.48E-02
SGCA	4.24	5.59E-03
RASSF5	1.81	4.61E-02
HCRTR1	3.46	2.03E-02
GCKR	2.87	4.03E-03
FBLN7	-1.04	4.30E-02
ALK	4.43	3.42E-03
ZPLD1	3.06	1.21E-02
HLF	-1.87	2.91E-02
IKBKE	2.03	1.22E-02
SIT1	-9.09	1.31E-04
CA6	-11.9	1.33E-05
MIR362	-11.98	8.35E-04
CABP7	2.01	3.35E-02
NPTX2	1.79	3.75E-03
AQP10	2.4	3.06E-02
PTGDR	-8.3	9.66E-04
SASH3	3.24	8.16E-03
NME5	-12.22	3.07E-04
SLC23A3	3.63	4.84E-02
GNAT1	-1.43	1.49E-02
PLEKHN1	-11.22	1.67E-06
C15H2orf62	3.51	5.73E-03
RAB44	2.99	9.21E-03
TBC1D10C	-11.7	1.10E-04
SLC1A7	4.33	4.54E-03
RBM20	2.44	1.07E-02
CTRB2	2.55	1.13E-02
C10H10orf113	-10.29	1.95E-05
CAPN12	5.84	7.22E-03
C12H17orf100	-11.5	3.95E-04
ANKRD2	2.82	3.15E-02
ATP10A	-1.43	1.62E-02
PARP14	3.17	1.21E-03
CCKAR	2.26	2.76E-03
MUSTN1	-10.36	1.24E-04
BPIFA1	-9.28	9.05E-05
BEST3	5.87	7.35E-04
ADAM8	1.61	3.36E-02
TRNAL-UAG	-12.26	3.59E-04
A1BG	3.67	4.54E-02
FAM228A	-9.94	1.33E-03
TMEM156	4.73	1.93E-03
IGFN1	4.38	1.08E-03
AHSA1	-11.89	3.50E-05
ZAP70	4.23	5.40E-03
SLC6A2	3.66	1.64E-02
ATP1B4	-8.98	8.18E-05
MIR221	-12.35	1.49E-04
MAP3K9	1.46	4.19E-02
C3H16orf96	2	2.31E-02
NPY2R	5	1.94E-02
SCNN1A	1.69	3.65E-02
CACNG5	-11.46	7.73E-05
ANKAR	11.46	5.43E-04
CYTH4	2.28	4.17E-02
OSTN	-11.08	8.71E-04
GP1BA	4.83	1.37E-03
TMEM170B	-1.77	2.00E-02
CD86	5.15	4.63E-04
TMEM143	1.34	2.07E-02
ESR2	3.53	1.20E-02
MORN3	3.27	3.69E-02
TMEM229A	4.14	5.74E-03
C13H3orf52	-11.28	2.26E-05
SCNN1B	3.13	2.18E-02
MEIS2	3.57	4.03E-03
RIN1	1.17	2.99E-02
KERA	-9.24	1.26E-04
HRK	1.3	2.27E-02
ACOT12	2.16	4.58E-02
AOC3	1.03	3.73E-02
TMEM136	-12.2	5.05E-06
GTF3A	-10.27	4.33E-05
NDEL1	-1.93	3.16E-02
GRB7	-1.68	9.35E-03
CYP2C42	3.94	4.13E-02
MIR505	-12.29	1.73E-03
ZYG11A	2.82	9.30E-03
C1H14orf105	2.31	1.51E-02
MIRLET7A-2	-12.15	6.94E-04
FGFR4	-10.53	1.56E-05
SLC47A2	4.93	1.51E-02
DOK5	-11.12	1.28E-04
PLIN4	4.96	2.59E-02
CYP2J34	-12.55	1.66E-05
PDE6A	4.12	4.04E-02
MIRLET7G	-12.49	3.29E-04
SPIC	3.35	3.72E-02
ACTRT3	3.14	1.00E-02
SIM2	3.13	2.63E-02
MED12L	1.44	4.69E-02
MRVI1	-2.05	3.08E-03
FBXO36	-11.82	8.28E-05
ASIC3	2.67	9.69E-03
GPR21	-1.89	4.44E-02
MT-III	-10.8	1.31E-04
PROCA1	1.27	1.78E-02
TSSK6	2.15	2.13E-03
ABCA4	1.47	3.96E-03
CARNS1	2.19	7.30E-03
CD14	3.23	4.20E-04
CBY3	12.19	2.64E-04
FLYWCH2	-1.23	4.33E-02
CDC42EP1	-1.53	2.88E-02
DYRK4	1.91	1.59E-02
MIR574	-12.49	5.81E-04
LCT	2.9	2.01E-02
CACNA1I	1.13	1.78E-02
IL16	-1.38	2.34E-02
NAV3	1.5	4.72E-03
MYO1G	1.26	1.22E-02
RAPSN	-9.71	4.81E-03
PTPRR	1.72	3.44E-02
PROKR2	1.83	1.20E-02
TRIM55	-8.98	7.60E-05
SPTB	2.92	3.61E-02
SFXN5	1.43	2.49E-03
CCDC37	-1.43	5.25E-03
KLHL21	-1.82	6.24E-03
MCF2	-3.44	4.83E-03
L3MBTL1	2.62	1.10E-02
KCNN4	12.24	6.53E-04
SNAP25	-1.7	3.60E-02
PPP1R3A	4.41	7.18E-04
MIR29C	-12.68	1.09E-04
GJB7	2.24	5.85E-03
DAPK2	-11.39	7.28E-07
GPR151	4.01	5.04E-03
PHACTR3	3.88	4.65E-05
PWWP2B	1.42	2.50E-02
ACSM5	2.9	1.61E-03
CLVS1	3.57	6.16E-03
HCK	2.05	2.63E-02
ZNF438	-2.4	6.96E-03
COL28A1	4.49	3.27E-02
C8A	6.13	3.55E-03
LINGO1	-1.54	4.05E-02
ANKRD34C	9.06	4.43E-02
MIR99B	-12.74	2.66E-05
PACSIN1	1.67	3.20E-04
SPATC1	3.79	4.84E-03
SP2	2.67	5.81E-03
GBX1	4.47	1.29E-02
C10H1orf95	-11.36	5.09E-05
C6H19orf73	-9.24	5.26E-04
CDH23	1.57	3.08E-03
MLNR	3.74	4.60E-02
ZBP1	1.5	2.93E-02
GPER1	3.37	7.00E-03
LIPC	1.55	2.64E-02
LTB4R2	1.88	3.96E-02
UNC45B	2.01	1.88E-02
GCNT3	1.63	1.18E-02
STRC	6.26	1.05E-02
BMPR1B	4.17	3.05E-03
GGT1	1.49	3.22E-02
TENM1	-2.15	3.23E-02
ARHGAP30	2.72	2.34E-03
SMCO3	3.5	1.00E-02
CYP21A2	4.74	1.93E-02
GPHA2	1.67	5.44E-03
GPR15	3.04	1.08E-02
MMP27	9.7	4.16E-02
PPP1R16B	-1.3	9.46E-03
BNC1	2.85	2.49E-02
STX1A	-1.77	1.13E-02
DNAH3	2.66	3.18E-02
SEZ6	4.97	1.42E-02
DMRTB1	4.37	1.98E-03
FAM78B	2.25	6.38E-03
KEAP1	4.46	1.54E-03
C2CD4D	6.6	2.61E-04
PNCK	-11.28	7.73E-06
TWISTNB	2.85	1.96E-02
ICA	1.48	1.96E-02
P2RX6	1.06	2.16E-02
MAB21L3	1.2	7.28E-03
GLI2	-1.83	7.05E-04
CACNA1F	4	1.41E-03
NR3C2	1.01	3.91E-02
SYBU	1.22	4.24E-02
SYN1	2.3	1.25E-02
SLC25A53	-1.82	2.26E-02
ANO3	4.78	1.09E-03
GGT5	1.7	2.26E-02
SUMO1	-12.77	7.08E-04
FOXE1	1.68	1.14E-02
CA11	1.44	2.48E-02
PPP1R42	4.25	2.73E-02
SEMA5B	-12.94	1.29E-05
IDI1	-12.78	5.14E-04
MIR135-2	-12.5	3.63E-03
LIPM	5.02	6.84E-03
NR2E3	4.76	1.21E-03
MMP8	6.02	1.24E-02
DOK2	1.17	1.63E-02
TYROBP	1.95	1.95E-02
CSN3	13.68	3.61E-07
KRT12	5.85	2.58E-03
LRRC71	4.25	1.50E-02
ADAMTSL4	2.59	2.32E-02
DGAT2	-11.71	4.53E-05
ODF3B	-9.17	8.30E-05
C9H7orf62	11.87	2.71E-02
FRMD7	3.8	2.37E-02
EGR1	-2.64	3.81E-03
PGLYRP1	12.5	3.31E-06
IL15RA	3	1.15E-02
RNF224	4.71	1.38E-03
KRT28	5.07	6.06E-04
AHDC1	-1.15	5.80E-03
ISLR2	4.25	1.38E-04
ZHX3	-1.42	3.80E-02
KLHL32	-1.27	2.69E-02
IZUMO1	1.69	2.07E-02
PITPNM3	2.89	3.16E-03
S100A8	-11.46	1.19E-04
CMTM5	-12.43	7.60E-05
TMEM88B	5.07	1.11E-03
TAL2	-11.16	8.78E-05
MROH6	2.14	1.26E-03
CCDC96	2.4	1.92E-03
COL11A2	3.53	8.04E-04
NECAB1	-12.65	1.80E-04
MIR125A	-13.02	2.16E-04
CAP2	-1.78	4.02E-02
C12H17orf105	-12.71	8.74E-05
WBSCR17	-1.68	3.50E-02
FOXL1	4.65	4.10E-04
TEX15	-3.19	2.50E-02
CLCA4	4.52	1.20E-03
GABRR1	4.05	1.71E-03
GPR146	1.07	1.59E-02
DPEP3	4.77	4.66E-04
MYH15	3.3	7.23E-03
PLEKHB1	4.59	2.17E-03
PRSS36	1.2	4.20E-03
SLC18A1	3.35	6.86E-03
MIR145	-12.91	6.06E-04
NDP	-13.09	8.61E-07
USH1C	2.57	2.38E-03
CLCN6	-1.55	4.12E-02
SLC5A1	1.81	6.65E-03
DNAH6	-2.31	2.13E-02
C3H16orf90	11.76	1.63E-05
RASAL1	5.73	2.14E-02
CCT6B	-13.14	4.90E-05
C1QL4	3.8	7.44E-03
MIR103-1	-13.14	2.40E-05
HSPB9	3.71	7.93E-03
GRIN2D	2.88	3.00E-03
MUSK	5.04	2.98E-03
TNR	4.08	6.11E-03
DHRS7C	4.65	2.28E-02
FHL5	2.66	4.78E-02
TRIM65	1.38	1.68E-02
C18H7orf31	5.4	7.90E-03
NAIP	11.22	7.33E-05
PI16	6.1	1.24E-03
SLA-DYB	4.23	1.99E-03
NXNL2	2.26	1.98E-02
DNAJC27	-1.63	3.30E-02
IL12A	4.24	3.21E-02
SLC12A5	4.48	3.30E-03
ABCC2	5.09	3.15E-04
CLDN9	4.77	8.57E-03
RALGPS1	-1.61	2.05E-02
FAM222B	1.16	1.08E-02
OAZ3	3.7	3.13E-02
C3H16orf54	2.27	4.43E-02
RDH5	6.33	4.74E-05
C2H2orf81	1.33	1.39E-02
IFNLR1	-10.64	5.85E-04
NME9	10.55	4.23E-02
SIAH1	-1.68	3.99E-02
FAM205A	5.79	3.21E-03
FGF21	2.43	3.96E-02
SELL	6.4	5.09E-03
MATN1	-1.71	9.14E-03
SLC7A4	2.01	3.21E-02
CELF5	1.97	1.53E-02
SPHK1	3.54	3.53E-04
SYT5	-1.09	2.76E-02
SERPINC1	3.98	9.06E-03
SRPK3	1.43	4.79E-02
AKR1C4	4.9	1.81E-02
SYNPO2L	3.86	1.06E-03
TCEAL3	2.47	4.67E-02
ELAVL2	-12.84	9.33E-05
FAM151A	13.69	1.30E-09
ARMC3	6.5	7.79E-03
GDPD2	3.52	4.35E-03
C6H1orf210	1.34	4.16E-02
ANKRD53	1.83	7.91E-03
ADH7	-7.37	1.48E-04
FGF4	-12.79	2.02E-05
RILP	1.3	2.83E-02
CLDND2	2.83	4.37E-02
LRRTM1	3.37	5.49E-03
TOX	-2.13	2.48E-02
OLFML2A	-1.57	1.53E-02
LONRF3	-1.51	2.89E-02
ADARB2	1.39	1.25E-02
HSF4	3.33	9.48E-03
EML5	2.34	2.50E-02
FIGNL2	1.31	1.17E-02
ZNF334	-13.12	8.60E-05
HIVEP2	-1.46	2.62E-02
NEK5	1.43	3.62E-02
FMNL1	1.35	4.44E-02
RTN1	2.14	9.62E-03
BMP8B	3.1	1.95E-02
LBX2	-12.5	1.90E-04
GGN	1.95	1.00E-03
ZNF575	1.32	1.41E-02
HTR1D	1.48	2.34E-02
MIR107	-13.23	9.64E-05
STOX1	1.64	1.10E-02
UNC13D	2.2	1.29E-02
GPSM3	3.72	6.70E-03
TAS1R3	2.81	2.07E-03
FSIP1	-1.9	4.68E-02
REC8	2.26	2.63E-03
CCK	1.87	3.44E-02
CNFN	4.27	1.44E-02
RFX6	-10.86	7.43E-05
PHOSPHO1	3.89	4.19E-03
ZNF703	1.06	1.55E-02
TTC39B	-1.82	4.97E-02
FBXO41	1.2	1.14E-02
RPS6KL1	2.66	8.95E-03
IGSF1	-1.01	4.53E-02
MTL5	2.61	1.45E-03
WNT8B	4.83	1.63E-02
BMP3	-1.89	9.73E-03
CPNE8	-1.71	4.98E-02
NAGS	3.76	2.92E-02
COL4A4	-1.24	2.33E-02
SAMSN1	3.32	4.39E-03
ADRA1D	6.08	5.72E-03
NLRC3	5.47	3.68E-03
GPR68	3.44	4.25E-02
GK	-1.45	4.99E-02
RSPH9	5.07	3.21E-02
MAGIX	1.41	9.36E-03
CNGA3	11.21	3.96E-02
MDGA2	-1.86	4.18E-02
LPIN1	-1.72	1.17E-02
NOS3	1.42	1.63E-03
PTPN7	3.52	1.46E-02
BPIFB1	3.9	2.58E-02
C1H15orf52	1.53	7.34E-03
CHDH	2.76	2.24E-03
RANBP3L	3.31	4.53E-03
PDZD3	3.99	1.38E-02
PRR15	4.27	4.83E-03
GNA14	4.58	3.23E-03
PKDREJ	2.55	8.76E-03
PASK	-1.22	3.22E-02
FGR	1.42	1.58E-02
SOX15	3.26	1.31E-03
ATP2C2	1.11	1.86E-02
WDR62	-1.46	1.07E-02
MDGA1	-1.01	3.66E-02
CSRP3	2.19	2.28E-02
MIR628	-13.42	5.03E-05
STAT6	1.34	4.99E-02
ARL4C	1.65	3.64E-02
GRAMD3	1.47	1.33E-02
SLC15A1	5.88	1.38E-03
CDKL2	-1.9	1.46E-02
SLC16A12	2.19	1.99E-02
SERTAD2	-1.14	4.57E-02
AFGF	5.61	1.41E-03
CIDE-B	3.18	9.46E-03
FAM211B	2.49	8.97E-03
FAM107A	2.22	1.75E-02
CXCL13	11.19	1.90E-05
ARSJ	-1.63	3.09E-02
KCNA6	-1.37	4.95E-02
CNNM2	1.15	4.57E-02
PPM1J	3.46	1.06E-02
SMYD1	2.47	9.17E-03
CASR	4.15	3.72E-04
LRFN5	-2.46	1.34E-02
TNK2	-1.32	2.12E-02
TSGA10	-1.78	2.73E-02
SCARB1	-1.22	4.03E-02
ZNF594	2.14	3.77E-02
SLC9A2	5.57	3.51E-04
EXD3	1.08	4.28E-02
SH3PXD2B	-1.38	1.67E-02
BST2	-13.57	3.13E-06
KLF17	2.52	2.39E-02
LCN15	2.65	1.15E-02
UCP2	1.61	3.89E-02
FBXO40	6.75	7.14E-04
GPR62	4.84	1.20E-02
MIR98	-13.31	1.65E-03
LRRC4	2.42	1.52E-02
SUFU	-1.23	4.61E-02
NIPAL4	1.92	3.15E-03
VWA5B2	2.26	4.41E-03
TRIM14	3.45	2.85E-03
NCCRP1	1.21	5.69E-03
ZNF782	-2.98	2.27E-02
KCNC2	4.07	1.77E-02
LRRN4	5.93	3.32E-03
SLC18B1	-2.53	2.96E-02
ABCB4	4.89	1.72E-02
PLCD4	3.54	4.33E-03
SPSB4	-1.32	7.44E-03
GPRIN1	3.7	2.11E-03
NOVA1	-3.13	4.62E-02
PRF1	4.99	5.60E-03
KIAA1984	4.93	2.49E-03
CARP	4.35	7.35E-03
KIRREL3	1.85	2.56E-02
IREB2	-1.68	1.97E-02
NUTM1	6.13	2.93E-03
CTNNA2	-1.46	3.61E-02
FAM217B	-1.48	2.62E-02
ABHD15	2.49	6.04E-04
PTCRA	3.73	2.51E-03
KRT20	6.24	6.41E-04
CDH12	-1.36	3.87E-02
IGF1	2.42	2.31E-02
FOXH1	3.79	2.65E-02
TRUB1	-1.41	2.02E-02
SHC3	-1.5	4.67E-02
TMEM132D	1.04	2.31E-02
M1AP	5.83	1.36E-03
PLRG1	-3.1	1.40E-02
NCF2	3.24	4.99E-03
TRNAA-CGC	-12.31	7.34E-07
C4H1orf111	10.97	4.30E-02
BSPRY	3.8	3.10E-02
ZNF516	-1.14	1.58E-02
SNED1	1.93	1.32E-02
NCF1	2.78	1.06E-02
WASF1	-2.67	1.01E-02
CALN1	-1.03	4.26E-02
KIF25	1.35	4.89E-02
COL5A3	1.29	3.04E-03
SPATA4	4.67	2.66E-03
CASQ1	3.02	2.62E-02
CNTNAP1	2.93	4.29E-03
SLA-DRB4	4.1	7.08E-03
C3H16orf93	1.49	1.72E-03
ZNF454	-1.95	9.76E-03
LY6H	-1.23	3.17E-02
MAK	6.77	9.33E-04
SATL1	13.97	9.77E-06
C14H10orf99	4.7	2.87E-02
ETV2	1.6	4.30E-02
RAB6B	2.38	1.42E-02
HS3ST2	1.56	1.56E-02
AOC2	2.89	2.70E-02
TRNAV-UAC	-13.74	2.96E-08
ATP2A1	3.62	4.91E-04
SCML1	-1.28	4.77E-02
ZNF750	1.84	2.88E-02
ARSI	2.03	3.32E-02
SRCIN1	4.56	1.51E-03
CD38	2.64	1.07E-02
CCM2L	1.77	2.64E-03
ODF3	6.03	3.83E-03
FMO2	-2.28	4.51E-02
MIR152	-13.81	3.29E-05
CD80	6.78	1.57E-03
SEZ6L	-1.14	1.79E-02
SPATA25	4.44	2.26E-03
DUOX1	1.93	3.23E-03
PIDD	1.64	8.75E-03
C14H10orf2	-1.98	3.14E-02
NEURL	3.16	3.43E-03
MMP19	2	4.19E-02
BPIFB5	5.56	1.43E-03
TOP1MT	3.65	2.48E-03
NUP214	-1.39	5.30E-03
P2Y12R	4.12	1.23E-02
WDR17	-1.59	4.13E-02
MYO1H	5.88	9.21E-04
ZNF821	-1.86	4.13E-02
PLCH1	-1.58	2.26E-02
MYBPC3	1.64	6.76E-04
PSD	1.35	3.83E-02
TTC36	2.53	8.11E-03
GCA	-2.31	3.13E-02
KLHL14	2.89	2.15E-03
TUBB1	5.9	1.37E-03
ABRA	6.47	2.21E-03
SAP25	1.93	2.45E-02
NDUFA4L2	3.44	8.16E-03
TRNAP-AGG	-12.55	2.97E-05
DLGAP4	-1.15	2.43E-02
KCNH8	2.26	4.72E-03
IFN-ALPHA-5	13.89	3.07E-04
RSPH3	-2.06	2.00E-02
DEPTOR	1.31	4.56E-02
PDSS2	-13.36	3.71E-05
CELF3	5.33	8.35E-03
KANK4	-1.71	3.14E-02
CLIC6	1.44	1.37E-02
SL44-1	4.9	1.98E-02
SPATA21	11.41	2.93E-02
CISH	2.3	8.10E-03
SLC16A8	3.7	1.08E-04
CHST1	3.62	5.66E-03
CAMK1G	2.31	3.32E-02
TULP1	1.74	2.27E-02
OXT	4.57	2.46E-02
GPX2	4.26	8.48E-04
ASXL3	-2.06	1.11E-02
RGS16	-12.07	3.26E-04
SLC2A11	1.69	1.73E-03
TREH	4.75	5.44E-03
HS3ST3B1	-1.7	2.75E-03
TSSK2	11.93	2.23E-02
GLRA2	4.64	1.48E-03
C1QTNF4	-1.37	3.81E-02
ADRA2A	2.43	1.88E-02
ALOX5	3.6	9.17E-03
BRINP2	1.86	4.21E-02
ACHE	2.7	2.39E-03
SOX21	7.22	1.07E-03
PDZD2	1.72	2.05E-03
SCN11A	-3.82	2.38E-03
SCRN1	4.65	1.37E-03
AIRE	4.8	5.72E-03
ARL13A	11.28	4.30E-02
COL24A1	1.46	3.51E-02
CD300LG	2.29	1.78E-03
IPPK	1.63	2.52E-02
KLLN	3.79	2.65E-02
LYL1	2.21	3.32E-02
C1H9orf169	1.42	3.74E-02
TCF24	3.96	1.05E-02
MIR664	-13.94	2.87E-04
CADM3	-2.04	2.80E-02
CCDC64	1.43	9.00E-03
RASA4	-1.07	1.57E-02
TGFBR3L	3.02	9.07E-04
IL12RB2	3.44	2.77E-03
TMEM158	1.63	3.43E-02
CCDC64B	2.07	4.50E-03
TMOD4	3.11	1.81E-02
PIANP	2.86	9.87E-03
LRRC56	2.1	4.33E-03
RNASEL	2.17	2.29E-02
MSTN	4.74	1.18E-02
FOSL1	6.06	4.30E-03
FSCN2	1.62	9.16E-03
GREB1L	2.55	8.79E-03
LAG3	3.74	9.60E-03
MSLN	-10.63	5.84E-05
RASL11A	-13.32	3.09E-05
ANGPTL7	2.58	2.01E-02
LRP11	1.92	1.09E-02
GALNT12	2.37	1.72E-02
DUOXA1	3.68	1.65E-03
ADM5	1.96	9.88E-03
ASTN2	-1.5	1.35E-02
GPR114	1.74	6.76E-03
TMEM95	2.64	6.93E-03
COL4A6	-2.5	1.32E-02
IGSF9B	2.8	4.47E-04
USP2	2.38	5.38E-03
PFN4	4	2.25E-03
AATK	4	1.41E-03
TMEM104	2.2	9.79E-03
STEAP4	6.01	2.92E-03
SLC2A6	1.12	3.89E-02
NDUFC2	-13.92	2.88E-04
SLC16A11	5.47	1.10E-02
FZD9	4.56	1.89E-03
HSD17B1	2.69	4.77E-04
CD274	2.91	2.36E-02
HHATL	4.8	9.37E-03
FAM65C	2.21	7.47E-03
GABRA2	-2.14	4.73E-02
SORBS1	-1.04	4.92E-02
ZBED6	-2.8	1.94E-02
ZNF644	-1.62	3.23E-02
CXCR5	7.47	7.13E-03
VTCN1	1.43	4.61E-02
REP15	2.82	9.33E-03
FAP	-2.06	4.86E-02
CLSTN2	1.44	1.00E-02
AGER	4.1	1.26E-03
GTPBP2	1.68	1.28E-02
PROM1	-1.51	2.87E-02
ITGAE	4.15	1.59E-02
KIAA1919	-1.82	2.14E-02
MYBL1	-2.38	1.98E-02
TSNAXIP1	3.33	8.31E-03
TXLNB	4.61	6.19E-03
KIF18B	-1.14	1.83E-02
MYOM2	-1.38	1.05E-02
SLC28A3	5.22	6.22E-03
FAM83A	2.4	3.34E-02
CCDC176	3.66	3.04E-02
PCP4L1	1.36	2.54E-02
PLB1	1.73	5.93E-03
LYZ	3.59	2.57E-02
SYTL3	3.81	8.29E-03
BTBD17	6.24	1.96E-03
SETD1A	1.97	1.76E-04
MIR1271	-14.1	3.97E-04
ZNF180	-2.29	1.99E-02
CYP4V2	-2.81	6.82E-03
AFAP1L1	1.35	4.53E-02
EPS8L1	4.15	2.00E-03
WFDC3	1.23	4.98E-02
ITK	5.48	1.07E-02
A2M	2.37	1.19E-02
CCDC171	-3.02	4.78E-02
FARP2	1.86	7.35E-03
PBLD	-1.83	4.45E-02
CDKL1	1.89	2.39E-02
ABLIM3	2.69	2.77E-03
TBC1D30	-1.13	4.89E-02
MMP-13	2.58	1.62E-02
IRF5	4.96	9.19E-05
ME1	-2.63	9.72E-03
ASB5	-1.58	2.62E-02
MYH1	2.56	6.92E-04
ASCT1	-1.05	4.36E-02
GBP6	6.32	1.55E-03
PITPNM2	1.99	1.66E-03
MIER2	-1.54	3.57E-02
FAM109A	-1.51	1.68E-02
GAREML	1.94	7.82E-04
SUN1	2.89	2.78E-03
NFIA	-2.18	1.93E-02
ZFP37	-1.78	4.14E-02
SLAIN1	-2.42	1.70E-02
CD70	-13.54	3.40E-06
PHOX2A	5.09	3.22E-03
PPPDE2	-1.38	3.04E-02
CCDC110	4.45	5.60E-03
KMT2C	-1.38	2.13E-02
MYO1F	4.02	7.34E-04
MLANA	12.07	4.51E-02
SMG9	1.7	2.24E-03
SCN8A	3.18	4.16E-03
S100G	1.87	1.99E-02
PLLP	3.13	7.91E-03
BVES	-1.59	1.64E-02
MIR130A	-13.11	2.93E-04
RAB30	-2.98	2.88E-02
CHST12	1.09	4.16E-02
CA10	3.33	1.01E-02
SLC4A11	2.68	1.05E-02
RUNDC3B	1.82	3.76E-02
RBP4	-2.03	3.50E-03
LPAR5	5.58	7.39E-04
ENO4	5.19	1.62E-03
SLC8A2	-1.74	5.72E-03
DIO1	11.27	3.73E-02
PRICKLE2	-1.45	2.81E-02
PPP1R1B	-2.07	1.68E-02
MIR1296	-13.55	2.13E-04
ESPL1	-1.39	9.49E-03
PHACTR4	-1.43	4.34E-02
KRBA2	-2.24	6.95E-03
ATXN1L	1.78	4.35E-03
UNC5A	4.6	5.81E-04
ITGB7	3.92	1.80E-03
NOXRED1	2.87	7.63E-03
CD72	3.61	3.28E-02
ZNF432	-1.86	4.06E-02
1-Mar	4.15	5.76E-04
CTSW	6.05	2.84E-03
PARK2	1.38	9.90E-03
TREX1	1.85	2.91E-02
CHSY3	1.71	1.80E-03
MCMDC2	4.99	8.08E-03
MMP3	3.21	2.70E-03
KIAA1239	6.24	1.82E-03
WDR27	-1.63	2.78E-02
TMPRSS15	3.46	9.85E-03
CACNA1G	-1.14	4.64E-02
CPSF4L	3.51	3.78E-06
SV2A	2.51	1.84E-02
FOXO1	1.25	1.03E-02
ZNF713	-1.86	1.48E-02
SNTB1	2.27	3.80E-02
PRSS53	3.09	8.71E-04
APOBEC3F	-1.43	3.26E-02
TRPV6	4.41	2.02E-03
ECT2L	4.25	2.51E-03
FAM155B	-2	1.31E-02
SLFN11	-2.58	4.13E-03
XRRA1	1.98	1.70E-02
JHDM1D	-1.48	2.37E-02
ABCA5	-1.86	2.00E-02
TMPRSS9	5.96	7.80E-03
SLC25A47	2.49	3.79E-03
CCDC30	-1.17	4.97E-02
TMOD2	-2.03	2.07E-02
ZNF200	-1.75	2.74E-02
FSBP	-2.24	1.77E-02
EPB42	5.12	4.85E-03
CHRM4	5.23	2.48E-03
CCNE1	-3.51	1.61E-02
FADD	1.81	3.12E-02
DCAF16	-1.28	3.38E-02
PYCARD	2.94	1.55E-02
RNF157	-1.03	3.50E-02
ELMO1	2.35	2.61E-03
IAPP	11.35	4.95E-02
PLEKHH2	-1.91	2.04E-02
NOXO1	3.99	1.65E-02
ARNT2	-2.08	2.52E-03
PIK3C2G	-1.87	3.45E-02
NRTN	2.75	3.17E-03
GPRC6A	7.14	2.73E-03
PODXL	1.05	1.45E-02
MSRA	-2.77	5.57E-03
DIO2	3.76	2.26E-04
CAPN6	-1.02	4.94E-02
SPIRE2	1.47	4.47E-03
ZNF227	-1.32	3.53E-02
WDR93	3.33	1.02E-02
PRKAG2	2.87	1.40E-03
ZNF786	-1.27	2.34E-02
VSIG2	4.92	1.54E-03
C4H1orf56	4.59	3.16E-03
CNR1	-2.06	1.86E-02
GPAT2	6.4	1.84E-03
MAP7D2	1.33	3.91E-02
RFX7	-2.19	4.14E-02
SLC6A8	-1.1	4.74E-02
RAPGEF5	-1.36	2.79E-02
GAP43	1.11	1.99E-02
RNF207	6.11	2.99E-04
MIDN	-2.09	3.39E-02
FITM1	4.28	3.46E-03
EEF2K	-1.08	3.08E-02
TIMP-4	3.37	1.66E-02
ZNF33B	-3.19	7.41E-03
FAM184B	3.55	2.81E-03
TNFSF9	1.98	6.40E-03
KRT25	5.01	1.87E-03
DPM2	-1.33	2.11E-02
SAMD15	4	1.46E-02
GPR85	-2.01	3.77E-02
MAP10	-1.58	2.41E-02
SLC25A35	4.17	5.06E-04
MYOT	4.04	9.08E-03
ANGPTL6	1.82	1.21E-02
TTLL4	-2.75	1.30E-03
SYT1	-1.63	2.34E-02
NAB2	1.91	8.52E-03
ICA1L	3.45	1.86E-03
MYL3	-10.14	7.99E-05
GSTO2	3.72	2.16E-02
C12H17orf72	6.32	3.62E-03
MBNL3	-2.41	1.48E-02
KLF8	-2.46	1.76E-02
TMEM255A	4.78	6.67E-04
LCA5L	4.64	4.17E-03
LRRC29	2.65	2.53E-03
CXXC5	-2.22	4.43E-02
RASGRP4	5.65	1.19E-04
MYH7B	1.82	2.48E-03
CHST9	-1.83	3.44E-02
CST7	5.23	9.33E-03
CMTM8	2.23	8.42E-03
RNF217	-1.08	4.90E-02
OCRL	-1.36	3.43E-02
EDA	-1.52	1.78E-02
ADAMTS18	2.01	2.71E-02
TATDN2	-1.18	2.88E-02
HAS1	5.53	2.24E-03
FRS3	3.14	1.62E-03
TP53INP2	3.57	3.33E-03
TMPRSS11A	-10.84	5.73E-05
AMZ1	5.55	2.14E-02
HRC	3.93	7.48E-03
MIR1839	-14.47	5.02E-04
GPR162	3.86	3.48E-04
CCL25	2.16	2.90E-03
HOOK1	-1.96	2.74E-02
TPP1	1.72	8.82E-03
SESTD1	-1.92	1.93E-02
C2H11orf35	3.72	3.20E-04
LHB	2.77	3.85E-03
MIRLET7E	-12.15	7.62E-07
FAM84B	-1.17	4.38E-02
MMP1	3.15	2.08E-02
KCNG1	-1.49	4.46E-02
CCRN4L	2	2.48E-02
MYADM	1.31	2.99E-02
CRMP1	-1.74	4.31E-03
FBXO39	2.7	1.04E-02
PARS2	-1.25	1.26E-02
FRS2	-2.21	2.08E-02
MIXL1	2.64	6.16E-03
ELL3	2.17	1.10E-02
RTDR1	11.68	3.42E-02
DLEC1	3.81	2.62E-02
MIR17	-14.47	2.00E-04
CAND1	-2.99	1.17E-02
ARL11	5.47	8.42E-03
CSK	-1.92	3.27E-02
DNAJC12	-2.58	1.95E-02
CCDC42B	6.75	1.28E-03
SMPDL3B	4.07	1.24E-02
TRNAR-ACG	3.41	7.39E-03
SUPT20H	6.19	1.97E-03
SHQ1	-2.04	3.65E-02
SVOPL	6.62	1.57E-03
ITGA3	-1.21	1.39E-02
MCCD1	5.16	1.61E-03
SLITRK2	-2.01	9.91E-03
GPAT	-1.73	4.28E-02
IL18BP	2.25	8.79E-03
PTCH2	-1.52	9.42E-03
HSPB2	1.39	8.37E-04
CCDC74B	5.16	4.10E-03
SLC4A9	4.68	3.81E-04
SCAND3	-1.93	2.06E-02
CHST15	-1.39	2.15E-02
EDN3	-1.74	7.02E-03
IFN-DELTA-3	14.17	3.25E-07
ZBTB4	1.95	3.07E-03
CORT	-1.15	2.01E-02
PHLPP1	-1.2	2.73E-02
IGFALS	3.21	4.14E-04
TM4SF18	-1.86	4.76E-02
IFFO1	1.72	1.14E-03
SNCA	1.72	2.33E-02
HIGD1B	4.99	6.64E-03
TMEM74	2.72	4.37E-03
HPSE	4.36	3.16E-03
C17H20orf194	-1.32	3.51E-02
MIR378-2	15.3	7.44E-06
IFN-DELTA-7	14.99	1.49E-06
RLN	4.17	1.60E-02
SNAP91	1.23	2.60E-02
MCPH1	1.79	1.61E-02
C5H12orf66	1.47	3.37E-02
FNDC9	7.1	1.34E-03
NRGN	1.55	2.30E-02
FN3K	1.44	1.80E-02
TANC1	-1	3.83E-02
UNC5D	-1.4	3.46E-02
ERCC6L	-2.38	4.37E-02
GNAO1	2.12	1.58E-02
RTKN2	-3.45	9.03E-03
PPP4R1L	-1.57	6.68E-03
MDP1	-2.08	1.32E-02
ZC4H2	-1.99	1.30E-02
TBC1D8B	-2.36	1.74E-02
GPR126	-1.93	2.29E-02
CDC6	-2.13	1.59E-02
PRMT3	-2.15	3.97E-02
FOXQ1	5.65	1.62E-05
UBASH3B	-2.08	2.39E-02
CLCA2	1.54	1.12E-02
BHLHE40	1.18	9.66E-03
PIGA	-1.38	3.37E-02
WAP	12.3	4.08E-02
WDR60	1.37	3.11E-02
C1H6orf211	-2.38	1.33E-02
LMOD3	3.4	6.43E-03
LOXL4	2.52	4.44E-03
STS	4.44	6.48E-04
MB21D1	-1.25	3.19E-02
NT5M	2.33	4.57E-03
LRP8	-1.31	2.97E-02
BCL9	-1.13	4.59E-02
MYBPH	2.74	1.42E-02
TM4SF20	10.01	4.65E-02
GPR183	6.2	2.55E-03
TTYH2	-1.1	2.07E-02
PPP1R3D	-1.56	3.86E-02
MYH7	2.22	7.99E-03
DOLPP1	-1.52	2.24E-02
ASCL3	5.66	4.43E-03
DNMT3B	-1.1	4.65E-02
C9H11orf71	3.23	3.91E-03
WNT2B	3.7	4.93E-03
VASN	1.16	4.61E-03
RGS7BP	2.46	5.21E-03
IRF8	3.99	3.81E-03
ZKSCAN5	-1.15	3.75E-02
HSD11B2	-2.44	1.54E-02
GBP7	6.55	1.61E-03
NPFF	3.58	4.10E-03
NAALADL1	4.33	1.35E-03
CXHXorf23	-2.22	1.34E-02
RBM41	-2.8	1.17E-02
CCL19	4.23	2.89E-03
SNX16	-2.08	4.03E-02
SH2B1	1.26	1.54E-02
PRDM1	-1.28	2.94E-02
WNT10B	-1.88	6.86E-03
PRICKLE3	2.1	2.01E-03
NOTCH4	2.58	3.02E-04
MFRP	7.3	1.13E-03
LENG9	2.89	7.95E-04
TRNAS-UGA	-14.83	1.65E-06
ITGB8	-2.65	1.52E-02
MDM1	-2.36	2.76E-02
FAM129C	2.54	1.05E-02
IER3	1.83	2.43E-02
F2R	-1.58	4.03E-02
OTUD7A	6.69	2.92E-04
IQCD	1.41	2.88E-02
NAT8	6.15	6.79E-03
CPLX4	-1.84	3.48E-02
MAPRE3	1.6	7.94E-03
ASB9	-1.46	3.20E-02
FAM65A	3.39	1.19E-04
CAMKV	6.86	1.17E-03
TFAP2C	-1.71	3.05E-02
SLC15A2	3.72	2.52E-03
LRCH2	-2.25	2.62E-02
SLC17A5	-1.54	3.87E-02
FAM81A	1.29	1.71E-02
NCEH1	-1.96	1.73E-02
C16H5orf28	-3.75	2.25E-02
AHR	-2.46	2.22E-02
C4H8orf47	1.49	3.68E-02
SLC25A19	1.38	2.27E-02
PAQR6	2.41	1.82E-03
SLC35G2	7.04	9.58E-03
ARMC7	1.91	2.61E-02
ICK	-1.31	3.55E-02
C4H8orf82	1.49	1.46E-02
NLGN1	-1.84	3.57E-02
GALNS	1.3	2.00E-02
BAIAP2L1	1.29	4.90E-02
CRISPLD2	-1.29	9.20E-03
TACC2	-1.05	2.31E-02
TTC26	-1.63	4.17E-02
GBP5	5.37	9.88E-04
DEPDC1B	-1.8	3.32E-02
CAMK2N2	10.03	4.15E-02
NIF3L1	-1.63	3.97E-02
METTL13	-1.39	9.20E-03
PANX1	-2.03	1.12E-02
CALY	1.29	2.51E-02
NKAP	-1.82	3.93E-02
DRAM1	2.2	2.47E-02
USP51	2.69	4.64E-03
ARMC9	-1.79	1.44E-02
FMO5	2.62	3.55E-02
RPP40	-1.61	2.52E-02
ILKAP	-1.03	3.97E-02
POM121C	2.39	9.29E-03
AXDND1	2.09	1.47E-02
NMT2	3.53	1.90E-03
JDP2	1.34	2.52E-02
SRC	-1.02	3.02E-02
PITPNM1	1.86	4.46E-03
ATP6V1G2	1.96	1.70E-02
RGS22	-2.3	4.71E-02
SF3A2	-1.05	1.87E-02
CYP4F55	1.27	1.68E-02
CYP39A1	-1.74	4.46E-02
LPIN3	1.82	5.14E-03
REST	-2.61	1.09E-02
OSBPL10	1.07	7.23E-03
USP45	-1.8	4.33E-02
MIRLET7A-1	-14.96	1.08E-04
TMEM59L	-1.4	2.59E-02
ARMC8	-1.76	4.50E-02
CNOT3	1.26	2.08E-02
OPN1SW	6.19	2.05E-03
CCDC18	-3.17	1.19E-02
GRIA3	-1.76	1.58E-02
MED14	-1.57	3.86E-02
RAB27B	-1.65	3.41E-02
PPP1R18	1.16	2.99E-02
ATG14	-1.66	3.04E-02
CHODL	-2.93	6.54E-03
CNTNAP4	-2.33	1.10E-02
PLD5	-2.62	4.35E-02
FASTKD5	-1.82	2.32E-02
ZNF423	-1.25	1.14E-02
ZC3H6	-1.69	4.13E-02
FBXO42	-1.29	3.44E-02
FUT2	1.45	4.23E-02
GCOM1	3.24	3.61E-03
SLC12A1	7.68	2.86E-03
CLDN6	-1.64	6.50E-03
SPATA6	-1.44	4.20E-02
PLEKHG6	3.58	4.83E-04
ZCWPW1	3.64	6.26E-03
LINS	-2.09	3.81E-02
PLAUR	1.57	2.61E-02
PPFIA2	2.9	1.47E-02
SPNS2	1.76	1.86E-02
SSFA2	1.33	2.55E-02
FCHO2	-1.98	2.86E-02
XRCC2	-1.63	4.18E-02
ZFP42	-3.24	2.31E-02
NARG2	-1.56	3.65E-02
COL22A1	2.2	1.01E-02
FANCM	-2.63	9.49E-03
RBAK	-2.11	1.98E-02
LIPI	4.57	4.02E-03
ANKRD61	11.44	4.09E-02
C7H14orf79	1.96	2.59E-03
POFUT1	-1.24	2.40E-02
C1H9orf131	7.19	4.34E-03
UPP2	11.39	2.34E-02
ZNF598	1.17	2.80E-02
IQCB1	-1.85	3.32E-02
NOC4L	-1.05	2.03E-02
RCOR1	-1.85	2.43E-02
RPS6KB2	-1.3	2.83E-02
ZNF37A	-2.72	1.61E-02
ZNF287	-1.98	3.84E-02
BCL3	2.85	6.22E-04
KRT27	6.11	1.07E-02
ZNF333	-1.86	1.81E-02
DNAH9	2.62	3.60E-03
CBLB	-1.81	3.36E-02
AMTN	-2.92	1.25E-02
ZKSCAN7	-1.63	3.23E-02
TMEM120B	2.26	4.96E-03
PDE6C	6.24	1.79E-03
MIR143	3	1.78E-03
RAB3A	2.57	1.86E-02
SMPD1	1.17	2.38E-02
GCNT7	6.77	1.87E-03
TSPAN4	2.95	7.86E-04
ACPT	3.42	7.13E-03
PTGDR2	4.15	3.38E-03
P2RY14	4.6	2.83E-03
OCLN	-1.46	2.66E-02
SLC8A3	1.1	4.65E-02
NUAK1	1.42	2.38E-02
CAMTA2	1.94	5.78E-03
DAPP1	5.91	2.27E-03
ZNF605	-1.68	4.10E-02
TMEM261	2.12	1.68E-02
MPL	12.46	2.31E-02
SBNO2	1.55	1.49E-02
SERPINE3	12.66	1.95E-02
MFSD8	-2.24	3.36E-02
MIR199B	-12.6	2.94E-05
CCDC142	1.31	1.81E-02
PARPBP	-2.93	2.02E-02
GAB1	-1.64	3.08E-02
TACR3	1.27	2.23E-02
TTC32	3.15	3.77E-03
CNBD2	3.28	1.71E-03
SPAG4	4.94	2.66E-03
OCIAD2	-1.92	3.16E-02
TNIP2	1.95	1.33E-02
CHST13	5.9	5.10E-05
BCHE	-1.53	4.69E-02
ZNF394	1.21	1.54E-02
TRAF6	-2.23	7.81E-03
SIGIRR	2.72	7.54E-03
ZSCAN23	-1.71	8.96E-03
SYNE1	-1.34	2.29E-02
ETV7	5.61	6.55E-04
KCNMB3	5.78	6.68E-04
FOS	-2.72	4.08E-03
ADAMTS3	-1.64	1.95E-02
KRT222	3.66	6.24E-03
ULK4	3.1	9.73E-03
CBLC	1.82	8.14E-03
TPMT	-1.91	2.84E-02
ZNF407	3.59	2.85E-03
PHF6	-2.73	1.50E-02
KANK3	2.62	4.40E-03
RPAP1	-1.6	3.24E-02
WDPCP	-2.89	2.88E-02
CCNB3	-2.11	2.98E-02
GPR56	-1.46	1.22E-02
OXSM	-1.51	3.22E-02
AIF1L	-1.58	3.90E-02
SLC7A3	-1.62	4.27E-02
PHYHIPL	4.02	7.40E-03
TUSC1	1.87	1.41E-02
ZFP92	4.63	8.37E-05
FBXW2	-2.01	9.97E-03
NPSR1	5.41	1.29E-03
RCOR3	-1.66	2.61E-02
CHRNG	6.72	1.51E-03
KIAA1217	-1.14	3.87E-02
MYH6	4.15	5.16E-04
JRKL	-1.77	1.77E-02
LRRC20	1.01	3.08E-03
IMPDH1	1.58	1.04E-03
CCNT1	-1.96	2.13E-02
ESCO2	-1.64	3.69E-02
TTC23L	4.8	9.76E-04
RELT	3.69	5.10E-03
SLC26A7	-2.23	2.67E-02
BNIPL	2.54	2.14E-02
BRE	-1.93	8.10E-03
GEN1	-2.75	1.19E-02
SEC22A	-1.55	4.33E-02
TTC39A	1.18	3.35E-02
TDRD12	-1.45	3.01E-02
ZNF132	3.03	7.02E-03
FBXL16	5.14	1.60E-03
MAGI2	-1.2	4.03E-02
WDR24	1.13	9.82E-03
IL17B	2.43	1.75E-02
TMEM79	1.05	1.08E-02
BLNK	2.34	8.05E-03
HTR2B	7.87	1.38E-03
GLYCTK	1.62	3.50E-03
JAKMIP2	-1.36	3.90E-02
C7H14orf129	-1.37	3.99E-02
MORN5	5.52	2.55E-03
PSMA8	6.5	4.22E-03
PRX	1.33	1.15E-02
C15H2orf88	6.11	5.36E-04
TSC22D2	-1.36	2.74E-02
ANKRD26	-2.42	2.21E-02
GPR75	3.09	2.33E-03
SNX32	1.32	1.63E-02
OSR2	-1.49	3.06E-02
ABHD5	-1.68	4.85E-02
GPR33	7.9	2.16E-03
SYTL2	-1.11	4.18E-02
DNA2	-2.21	2.73E-02
ZFPM2	-1.43	2.79E-02
SNX10	2.28	1.88E-02
ITPR2	-1.61	2.96E-02
ARID4A	-1.63	3.66E-02
CRY1	-1.59	3.25E-02
CCR10	5.47	1.93E-03
SCN3B	5.4	2.56E-03
B3GAT2	4.85	1.03E-03
GRIN3B	4.12	7.09E-05
RANGAP1	-1.21	1.37E-02
SIX4	-1.8	3.88E-02
EXO1	-1.97	4.69E-02
C7H6orf136	1.54	3.62E-02
LAMB3	1.79	2.39E-02
SCN2B	-1.32	1.05E-02
TFAP2B	-1.96	2.16E-02
CA9	1.09	2.57E-02
ENTPD8	7.48	5.40E-04
BEST1	2.92	1.09E-03
VPS9D1	1.89	2.44E-03
C8H4orf21	-3.63	3.06E-02
HNF1A	7.52	6.40E-03
MPP6	-1.75	4.65E-02
NFIB	-2.19	1.96E-02
OVOL3	6.39	3.97E-03
EHHADH	-2.52	2.10E-02
P2RX2	1.18	4.01E-02
SLC13A5	5.76	2.11E-03
ALG3	2.49	7.89E-03
AASDH	-1.47	4.45E-02
GAA	1.21	4.85E-03
PSTK	1.92	6.90E-03
IFI35	3.26	5.29E-03
SPDYC	6.07	1.40E-03
GAS2L3	-1.91	1.99E-02
SCML2	-2.15	2.71E-02
GPX3	4.06	5.53E-03
ALG6	-2.46	2.15E-02
PRAM1	4.28	7.73E-04
ZNF18	1.38	1.61E-02
PIGL	1.06	3.72E-02
LDOC1L	-1.25	2.26E-02
GABPA	-2.17	2.48E-02
ASH2L	-1.37	2.64E-02
CNOT6L	-1.78	2.35E-02
FAM76B	-2.13	2.08E-02
LRRC34	3.12	4.80E-03
KLHL5	-1.98	2.19E-02
CCDC65	1.75	1.22E-02
CHAD	5.92	4.58E-05
LMBRD2	-1.77	3.62E-02
ZNF613	-2.01	2.71E-02
RNF128	-1.9	4.56E-02
DDX56	-1.14	4.82E-02
CTTNBP2	-1.15	4.30E-02
DENND6A	-2.97	1.64E-02
KLHL6	3.3	2.80E-03
MCM8	-1.82	3.99E-02
CCDC68	-3.09	1.24E-02
SLC4A7	-1.51	2.46E-02
MXRA7	1.09	1.14E-02
STEAP2	-1.55	4.05E-02
TMEM45B	12.22	4.35E-02
GPR34	3.78	1.25E-02
TPTE2	6.02	3.72E-03
GK5	-1.17	4.77E-02
WFIKKN2	2.34	1.48E-03
STAB1	2.43	1.98E-04
CXCR6	12.21	4.14E-02
GNG13	12.74	4.87E-02
AXIN2	-1.84	7.78E-03
MAP2	-1.81	2.47E-02
SIKE1	-1.79	4.62E-02
CDR1	14.22	3.01E-06
CENPL	-2.76	1.05E-02
F2RL2	2.53	1.28E-02
NR3C1	-1.65	3.50E-02
PLSCR4	-1.42	4.55E-02
IGSF9	-1.24	6.61E-03
GIMD1	6.8	5.41E-04
PTGIS	-1.3	4.73E-02
ANGPTL4	1.82	1.94E-02
PPM1E	1.99	4.80E-02
ALMS1	-1.71	3.17E-02
SLC22A23	2.57	1.04E-03
ROR1	-2.02	1.72E-02
FCGR1A	6.52	7.77E-03
LPPR5	3.31	7.21E-03
KIFC3	1.18	3.02E-02
AP4E1	-2.16	1.57E-02
CHM	-2.71	1.23E-02
FAXDC2	1.32	4.06E-02
SGCD	-1.76	4.37E-02
BICD2	-1.48	4.93E-02
NDUFA6	1.3	3.84E-02
CNTN4	-1.84	3.12E-02
APH1B	-1.32	4.53E-02
POLI	-1.99	3.26E-02
CHCHD4	-1.41	4.62E-02
PEX1	-1.73	1.90E-02
FANCD2OS	5.24	7.25E-03
ABCB10	-1.44	3.34E-02
NPRL3	1.83	5.53E-03
VSIG8	5.46	2.57E-03
LONP1	1.06	4.34E-02
WEE1B	6.61	6.30E-04
CUX2	2.71	1.84E-03
ZNF280C	-1.89	4.17E-02
NPAS2	4.68	1.30E-04
TESC	2.7	1.62E-02
POP4	-1.7	2.19E-02
ZBED3	1.66	2.64E-02
TRNAP-UGG	-15.14	4.12E-07
CAPN3	5.57	2.57E-03
FKBP5	-1.29	2.46E-02
GTDC1	-2.36	1.83E-02
MAPT	2.08	3.59E-03
SYVN1	2.07	8.14E-03
BRCA1	-2.61	7.99E-03
RUSC1	1.94	3.26E-03
SFMBT1	-1.76	2.49E-02
IFN-ALPHA-9	12.65	3.81E-02
CHD1L	-1.51	4.53E-02
SR-PSOX	1.29	1.87E-02
FSD2	6.63	1.27E-03
SPOPL	-1.76	4.38E-02
HSPB11	-1.68	4.20E-02
AGR2	1.48	1.90E-02
PPIL6	5.85	1.18E-03
SH3GL2	-1.99	2.49E-02
C2H19orf26	3.17	2.05E-04
EIF2C1	-1.21	3.81E-02
PQLC3	1.45	4.14E-02
PRR11	-2.84	4.17E-02
CCNI2	5.01	4.09E-04
DMP1	5.33	2.62E-03
CACUL1	-1.99	2.22E-02
SOAT1	-1.86	2.10E-02
C9H11orf42	7.58	1.21E-03
CENPT	-1.19	2.49E-02
ALG13	-1.59	4.45E-02
TRNAA-UGC	-15.5	5.08E-08
THAP5	-1.61	4.72E-02
MGA	-2.06	1.75E-02
MOB1B	-2.54	1.27E-02
ZNF567	-1.74	4.23E-02
HACL1	-1.59	3.73E-02
USP38	-1.41	1.63E-02
RFWD3	-2.09	1.65E-02
FAM98B	-2.8	2.33E-02
ZSCAN12	-1.67	3.59E-02
MRPL44	-1.98	3.71E-02
BTRC	-1.31	4.30E-02
MEG3	-2.1	3.94E-05
C16H5orf42	-1.58	3.92E-02
SGOL1	-2.44	1.96E-02
CYP7B1	-2.08	1.99E-02
SPSB2	1.63	1.54E-02
CELSR1	1.2	2.79E-02
CCNB1IP1	-2.25	2.64E-02
TIMM8A	-2.43	4.33E-02
ADCY8	1.84	1.65E-03
RAD51B	-1.61	3.03E-02
RNF222	8.06	1.63E-03
RELL2	5.89	1.58E-03
LRP12	-1.16	4.46E-02
INTS4	-1.81	1.38E-02
LRRD1	5.46	7.76E-03
DCAF5	-1.09	3.55E-02
SELO	1.19	4.50E-02
LRRC51	1.94	2.42E-02
KIF14	-1.44	8.63E-03
VCPIP1	-2.12	1.85E-02
SCAMP5	-1.23	2.14E-02
AMOT	-1.68	2.31E-02
DUS4L	-1.66	4.36E-02
FGFR1OP	-1.87	7.28E-03
INTS12	-1.7	3.30E-02
HAUS3	-2.44	3.51E-02
KIF21A	-1.89	2.28E-02
CKAP2L	-1.59	4.82E-02
SLC1A6	-1.47	3.15E-02
TTF2	-1.12	3.38E-02
KIAA0586	-2.6	3.81E-02
KLHL8	-2.13	1.26E-02
NAALADL2	-1.93	2.83E-02
PRG4	7.78	7.39E-04
C1H9orf9	4.8	1.67E-03
NUDCD1	-2.31	3.48E-02
PHKA2	-1.42	2.25E-02
ANKRD32	-1.65	4.73E-02
PCP2	6.75	8.64E-04
RIBC1	3.62	1.15E-03
MED23	-1.62	3.90E-02
PWP2	1.64	4.84E-03
MESP2	2.9	5.55E-03
COL8A1	-1.56	3.02E-02
LRIG1	1.7	1.71E-02
TXNRD2	1.39	3.64E-03
STAR	6.31	2.88E-03
RIPK2	-1.78	4.50E-02
NAPSA	5.76	2.52E-03
MTHFD2	-1.95	4.81E-02
ATP7A	-1.73	2.64E-02
CREB3L4	1.74	5.23E-03
NXPE3	-2.14	4.87E-02
KAZALD1	2.07	2.66E-02
SCEL	-11.87	6.54E-05
RNF38	-2.34	2.61E-02
DZIP3	-2.03	2.56E-02
EVI5	-1.73	2.37E-02
OTUB2	1.34	3.74E-02
RANBP17	-1.93	3.26E-02
BRIP1	-2.02	2.49E-02
ZNF197	-1.88	2.63E-02
FAM73A	-2.15	1.96E-02
RHOF	1.03	3.23E-02
TNFAIP8L2	5.33	3.39E-03
PHEX	6.37	5.86E-04
DSN1	-1.48	3.04E-02
FAM199X	-1.76	2.74E-02
STOML3	4.24	8.48E-03
P2RY11	5.05	3.63E-03
IGHMBP2	2.47	6.22E-05
MIR181B-2	2.13	3.21E-02
POGZ	-1.19	3.88E-02
LIN52	-1.77	4.10E-02
MTBP	-1.78	2.90E-02
CDCA2	-2.55	5.17E-03
SUSD4	-1.62	2.20E-02
FBXO2	3.49	4.11E-03
ANKRD34B	4.96	8.28E-04
KLB	7.5	2.01E-03
NEIL1	2.3	1.46E-02
ZNF655	-1.14	3.56E-02
HPCA	4.08	8.51E-04
SSC5D	3.51	1.27E-03
PPM1M	1.26	2.46E-02
LIPE	2.53	3.81E-03
AGFG2	3.33	2.60E-03
C2H19orf67	5.32	7.88E-05
LECT2	6.24	1.50E-02
ZNF396	-1.37	3.47E-02
PEX11B	-1.63	4.11E-02
TIGD2	-2.58	2.39E-02
CACNB2	1.96	1.35E-02
PICK1	1.3	1.08E-02
SLC4A1AP	-1.54	4.15E-02
CNOT6	-2.3	1.63E-02
POT1	-1.82	4.57E-02
KIAA0182	1.45	6.56E-03
RALGPS2	-2.18	1.24E-02
PGAP1	-2.62	1.97E-02
PKR	-2.83	3.64E-02
KIAA1009	-1.63	4.47E-02
LPGAT1	-1.26	4.61E-02
GMCL1	-1.83	3.08E-02
CD27	6.8	1.87E-03
HORMAD2	9.32	2.12E-03
ATP6V0A4	4.04	7.34E-04
FAM86A	2.08	1.62E-02
HFM1	-1.79	3.91E-02
NSRP1	-1.63	4.79E-02
STAP1	6.14	2.88E-04
ATF5	1.28	2.55E-02
MIR423	-14.8	9.69E-08
CNNM3	1.11	2.44E-02
ZNF667	-1.57	3.91E-02
IBSP	1.07	4.26E-02
OPA1	-1.76	2.68E-02
ENO3	1.05	4.00E-02
PDF	1.04	4.40E-02
FGL2	-2.15	1.49E-02
CHERP	1.43	3.26E-02
ELMO2	-1.08	2.13E-02
RMI1	3.3	1.22E-04
SLC25A41	4.74	4.10E-03
UFSP1	1.58	4.82E-03
ZC3HC1	-2.03	4.72E-02
MESP1	3.64	5.59E-03
BCL2	-2.35	2.37E-02
MST1	2.89	5.05E-04
PIK3R4	-1.65	3.63E-02
MATN2	-14.95	4.80E-05
MLH3	-1.6	3.70E-02
MMRN2	2.44	9.01E-03
CAPS	4.42	2.68E-03
KIF2C	-1.33	3.19E-02
CD97	1.05	4.28E-02
NT5E	2.66	1.20E-02
SLC7A2	-1.9	1.27E-02
RAPGEF6	-2.25	1.60E-02
FAM20A	1.94	4.13E-03
FDXACB1	2.46	4.90E-03
MAFK	2.6	3.69E-03
MYOG	3.33	1.29E-02
COL10A1	7.7	1.29E-04
DPPA5	10.72	3.97E-02
CENPQ	-1.93	3.64E-02
ATF7IP	-1.85	3.67E-02
ZYG11B	-2.75	9.87E-03
MIR4334	15.28	7.47E-06
BAALC	1.14	3.11E-02
TAB2	-1.6	3.55E-02
CHADL	4.32	2.35E-03
DERL3	1.96	1.23E-02
ZNF689	1.02	3.17E-02
ADAMTS6	-1.54	3.05E-02
ZNF385C	3.17	1.09E-03
EPHB2	-1.5	5.41E-03
TMEM102	1.44	1.96E-02
ANXA9	4.43	6.39E-03
BIRC3	-1.69	3.94E-02
CLOCK	-1.98	3.40E-02
SEC24B	-1.36	4.56E-02
ACTL10	8.24	9.00E-04
UBE3D	1.71	1.92E-02
HMGA1	-1.17	1.50E-02
ZNF280D	-2.36	2.30E-02
FOLR1	2.01	1.08E-02
CHRNB1	2.05	8.60E-03
ZNF624	-3.05	1.59E-02
PDGFC	-1.9	2.45E-02
GNRHR	13.14	2.47E-02
FBLIM1	-1.35	2.70E-02
C3H16orf5	1.65	5.01E-03
NKX2-3	-2.54	1.81E-02
BYS1	1.23	1.06E-02
ATAD2B	-1.54	3.82E-02
RAD54L	1.98	2.08E-02
SOX11	-1.51	3.42E-02
GINS4	-2.26	1.62E-02
LTBP3	1.29	2.14E-02
CCBE1	2.05	2.05E-02
SLC41A2	-1.37	4.52E-02
MMACHC	3.3	2.43E-03
DCST2	7.13	1.29E-03
[truncated: 1,239 more rows]
