# Supplementary material for: Integrated Analysis of LncRNA-mRNA Coexpression in the Extracellular Matrix of Developing Deciduous Teeth in Miniature Pigs
Source: Biomed Res Int. 2019 Jan 23;2019:6159490. doi: 10.1155/2019/6159490 (PMC6364112; doi:10.1155/2019/6159490)
Supplement: Supplementary Materials — Supplementary Table 1: the identified differentially expressed genes during the deciduous tooth germ transition from the cap stage to bell stage (E40 to E50) (XLS 100 kb). Supplementary Table 2: the identified differentially expressed genes during the deciduous tooth germ transition from the early bell stage to late bell stage (E50 to E60) (XLS 71kb). Supplementary Table 3: the identified differentially expressed lncRNAs during the deciduous tooth germ transition from the cap stage to the early bell stage (E40 to E50) (XLS 211kb). Supplementary Table 4: the identified differentially expressed lncRNAs during the deciduous tooth germ transition from the early bell stage to the late bell stage (E50 to E60) (XLS 626 kb). Supplementary Table 5: the significantly enriched KEGG pathways associated with the grouped DEGs (XLS 169kb). Supplementary Table 6: the expression changes of the ECM pathway genes from E40 to E50 and from E50 to E60 (XLS 11kb). Supplementary Table 7: the miRNA-target lncRNA and mRNA regulatory interactions of the ECM pathway (XLS 27kb). Supplementary Table 8: lncRNA and mRNA colocation analysis of the ECM pathway genes (XLS 30kb). Supplementary Figures: the developmental morphology of tooth germs at key development stages E40, E50, and E60 (Supplementary Figure 1). The coexpressed analysis of ECM genes and lncRNAs (Supplementary Figure 2) (DOCX 15mb). [file 6159490.f1.zip › Supplementary materials/Supplementary Table 3.xls]

AccID	Genelength	type_of_gene	E50_RMY_Normalized	E40_RMY_Normalized	Log2FC	FDR	Style	KeggID	Description	Blast_Symbol
LOC102163268	1548	ncRNA	0.391878844	104.8330997	-8.063470897	0	down	ssc:102163268	uncharacterized LOC102163268
LOC102164116	1712	pseudo	0.40224356	9.130662687	-4.504578344	1.62E-04	down		insulin-like growth factor 2 mRNA binding protein 1 pseudogene
LOC102167626	20640	ncRNA	0.187817142	55.82458693	-8.215428119	0	down	ssc:102167626	uncharacterized LOC102167626
LOC102163267	4687	ncRNA	6.930980284	1320.9769	-7.574330108	0	down	ssc:102163267	uncharacterized LOC102163267
LOC102164598	8770	pseudo	6.313266094	49.12299461	-2.959940047	9.44E-15	down		HERV-R_7q21.2 provirus ancestral Env polyprotein-like
LOC102167624	33472	ncRNA	0.119298255	22.2417718	-7.542554963	1.92E-11	down	ssc:102167624	uncharacterized LOC102167624
LOC102164115	7208	ncRNA	0	15.54311491	-20	2.28E-07	down	ssc:102164115	uncharacterized LOC102164115
LOC100738364	10812	pseudo	0.453022929	191.8319794	-8.726043458	0	down		tigger transposable element-derived protein 1-like
LOC102167627	1290	ncRNA	1.041488687	259.156123	-7.959030502	0	down	ssc:102167627	uncharacterized LOC102167627
LOC102161085	4248	ncRNA	0.265205787	87.73714099	-8.369931628	0	down	ssc:102161085	uncharacterized LOC102161085
LOC102166775	8500	ncRNA	0.461892688	117.219157	-7.987434945	0	down	ssc:102166775	uncharacterized LOC102166775
LOC102164597	3414	ncRNA	0.059649128	12.82637216	-7.748396418	5.21E-05	down	ssc:102164597	uncharacterized LOC102164597
LOC102164113	5680	ncRNA	0	16.97707367	-20	6.15E-10	down	ssc:102164113	uncharacterized LOC102164113
LOC102166773	3990	ncRNA	0.068518886	67.8745372	-9.952153035	0	down	ssc:102166773	uncharacterized LOC102166773
LOC102163265	4605	ncRNA	0.205556659	118.8013551	-9.174799465	0	down	ssc:102163265	uncharacterized LOC102163265
LOC102166772	37630	ncRNA	0.324854915	12.53723206	-5.270279527	3.42E-07	down	ssc:102166772	uncharacterized LOC102166772
LOC100157764	791	pseudo	0	15.82931957	-20	2.31E-07	down		interferon alpha-1-like
LOC100153390	4028	ncRNA	0.998084119	40.24918226	-5.33365425	0	down	ssc:100153390	uncharacterized LOC100153390
LOC102166767	1873	ncRNA	0.195191943	96.89569028	-8.955395185	0	down	ssc:102166767	uncharacterized LOC102166767
LOC102167614	2569	ncRNA	0.478137248	127.9863233	-8.064349137	0	down	ssc:102167614	uncharacterized LOC102167614
LOC102161079	63278	ncRNA	0.059649128	54.18808333	-9.827258863	0	down	ssc:102161079	uncharacterized LOC102161079
LOC102167613	1770	ncRNA	0.068518886	12.99515953	-7.567256924	1.50E-10	down	ssc:102167613	uncharacterized LOC102167613
LOC102164588	27008	ncRNA	12.00696583	380.3278398	-4.985300015	0	down	ssc:102164588	uncharacterized LOC102164588
LOC102167619	1075	ncRNA	0.205556659	182.2389861	-9.792079799	0	down	ssc:102167619	uncharacterized LOC102167619
LOC102164109	2126	ncRNA	0.333724674	71.07562631	-7.734552742	0	down	ssc:102164109	uncharacterized LOC102164109
LOC102164107	3175	pseudo	0.741848077	353.3218611	-8.895643532	0	down		eukaryotic translation initiation factor 4B-like
LOC102167616	2538	ncRNA	5.8829183	31.28437151	-2.410838215	0.002891812	down	ssc:102167616	uncharacterized LOC102167616
LOC102164582	3284	ncRNA	247.1475444	51.67388542	2.257865301	0.011188811	up	ssc:102164582	uncharacterized LOC102164582
LOC102163253	1292	ncRNA	0.537786375	104.7964068	-7.60634033	0	down	ssc:102163253	uncharacterized LOC102163253
LOC102167610	6768	ncRNA	0.195191943	11.87822748	-5.927282252	1.82E-05	down	ssc:102167610	uncharacterized LOC102167610
LOC102161075	15181	ncRNA	0	28.53680672	-20	0	down	ssc:102161075	uncharacterized LOC102161075
LOC102166761	1169	ncRNA	0.196686901	145.7427542	-9.533307568	0	down	ssc:102166761	uncharacterized LOC102166761
LOC102163254	1912	ncRNA	0.068518886	4.894833638	-6.158614312	5.43E-04	down	ssc:102163254	uncharacterized LOC102163254
LOC102157815	2657	ncRNA	2.106796708	351.4813449	-7.382253199	0	down	ssc:102157815	uncharacterized LOC102157815
LOC102165425	14040	ncRNA	0.265205787	18.66494734	-6.137075371	1.47E-07	down	ssc:102165425	uncharacterized LOC102165425
LOC102162398	2257	ncRNA	0.128168014	23.35576842	-7.509598836	6.88E-15	down	ssc:102162398	uncharacterized LOC102162398
LOC102166754	1362	ncRNA	0.391878844	81.8427926	-7.706303874	0	down	ssc:102166754	uncharacterized LOC102166754
LOC102164577	10542	ncRNA	2.253054998	131.276943	-5.864587208	0	down	ssc:102164577	uncharacterized LOC102164577
LOC102165429	24311	ncRNA	0.333724674	46.25654481	-7.114855341	0	down	ssc:102165429	uncharacterized LOC102165429
LOC102167607	2291	ncRNA	1.454096963	182.6910427	-6.973138615	0	down	ssc:102167607	uncharacterized LOC102167607
LOC102166758	41888	pseudo	0.390383886	37.61756706	-6.59036923	0	down		uncharacterized LOC102166758
LOC102162393	4308	ncRNA	0.205556659	130.5592298	-9.310952625	0	down	ssc:102162393	uncharacterized LOC102162393
LOC102163240	14055	ncRNA	0.068518886	49.09070485	-9.484732461	0	down	ssc:102163240	uncharacterized LOC102163240
LOC102162392	23053	ncRNA	28.32895399	3.864496842	2.873924841	5.65E-04	up	ssc:102162392	uncharacterized LOC102162392
LOC100154267	25002	pseudo	1.026739084	38.15768663	-5.215832194	0	down		ATP synthase subunit O, mitochondrial-like
LOC102166753	31115	ncRNA	0.800002247	437.8314941	-9.096155966	0	down	ssc:102166753	uncharacterized LOC102166753
LOC102166752	666	ncRNA	0	28.85676886	-20	0	down	ssc:102166752	uncharacterized LOC102166752
LOC100157780	695	pseudo	0.137037773	26.76674094	-7.60972407	0	down		PRELI domain-containing protein 1, mitochondrial-like
LOC102165422	728	pseudo	0.137037773	46.77905178	-8.415145198	0	down		ribosomal protein S4 pseudogene
LOC102162396	490	ncRNA	1.193376049	47.5217162	-5.315466306	0	down	ssc:102162396	uncharacterized LOC102162396
LOC102157805	527	pseudo	0.196686901	24.79119489	-6.977783121	2.75E-14	down		nucleolar protein 56-like
LOC102157801	46517	ncRNA	0.764523212	16.48685645	-4.430612231	4.16E-08	down	ssc:102157801	uncharacterized LOC102157801
LOC102157802	15352	ncRNA	0	18.75007488	-20	3.35E-11	down	ssc:102157802	uncharacterized LOC102157802
LOC100519166	6030	ncRNA	0.785152659	10.85229383	-3.788883017	3.61E-06	down	ssc:100519166	uncharacterized LOC100519166
LOC102165898	595	pseudo	0.196686901	174.388172	-9.792185599	0	down		Sjogren syndrome nuclear autoantigen 1 pseudogene
LOC102166746	928	ncRNA	0.792627446	45.63276541	-5.847283351	0	down	ssc:102166746	uncharacterized LOC102166746
LOC102164568	1278	ncRNA	0.204061702	41.93265278	-7.682924848	0	down	ssc:102164568	uncharacterized LOC102164568
LOC102165415	1980	ncRNA	0.26371083	154.6650012	-9.195974236	0	down	ssc:102165415	uncharacterized LOC102165415
LOC102165412	28179	ncRNA	0.205556659	25.73640415	-6.968130575	1.67E-15	down	ssc:102165412	uncharacterized LOC102165412
LOC102161059	1841	ncRNA	53.9558658	8.674202938	2.636976709	0.002202504	up	ssc:102161059	uncharacterized LOC102161059
LOC102163236	40996	ncRNA	0.461892688	65.04037716	-7.137634106	0	down	ssc:102163236	uncharacterized LOC102163236
LOC102166742	3097	ncRNA	0.128168014	23.84451792	-7.53947754	1.13E-12	down	ssc:102166742	uncharacterized LOC102166742
LOC102165411	1640	ncRNA	0.059649128	18.5798198	-8.283019754	5.99E-10	down	ssc:102165411	uncharacterized LOC102165411
LOC100513857	941	pseudo	0	15.1717827	-20	2.23E-07	down		olfactory receptor 6C2-like
LOC102164561	2579	ncRNA	0.881875765	125.3209506	-7.150836473	0	down	ssc:102164561	uncharacterized LOC102164561
LOC100525821	7837	pseudo	1661.915513	3560.782322	-1.099347202	0.012211807	down	ssc:100525821	uncharacterized LOC100525821
LOC102165005	1043	pseudo	0.068518886	52.67193246	-9.58631697	0	down		GTP-binding nuclear protein Ran-like
LOC100516919	3012	pseudo	0.187817142	39.76043276	-7.725860907	0	down		kinesin-like protein KIF23-like
LOC100525875	14481	ncRNA	23.21509458	235.0753028	-3.339987913	0	down	ssc:100525875	uncharacterized LOC100525875
LOC102167662	124542	ncRNA	300.2958356	138.5861699	1.115601176	3.69E-06	up	ssc:102167662	uncharacterized LOC102167662
LOC100737478	1408	pseudo	0.119298255	15.08665516	-6.982556228	2.32E-05	down		RING finger and transmembrane domain-containing protein 1-like
LOC102165481	54821	ncRNA	16.5762148	49.24187962	-1.570771229	3.44E-04	down	ssc:102165481	uncharacterized LOC102165481
LOC102165488	26082	ncRNA	12.74736814	2165.795831	-7.408554022	0	down	ssc:102165488	uncharacterized LOC102165488
LOC102164154	14276	ncRNA	12.66738307	1769.635736	-7.126190103	0	down	ssc:102164154	uncharacterized LOC102164154
LOC100626967	964	pseudo	0.068518886	14.88411032	-7.763055568	5.90E-05	down		V-type proton ATPase subunit e 1-like
LOC102165002	1582	ncRNA	0.205556659	74.48953427	-8.501357821	0	down	ssc:102165002	uncharacterized LOC102165002
LOC102157867	1244	ncRNA	0.187817142	77.57467379	-8.690113173	0	down	ssc:102157867	uncharacterized LOC102157867
LOC102158716	864	pseudo	0.196686901	58.25072186	-8.210231241	0	down		fatty acid-binding protein, heart-like
LOC102157862	1249	ncRNA	0.196686901	28.19923199	-7.163611184	0	down	ssc:102157862	uncharacterized LOC102157862
LOC102157864	5129	ncRNA	0.135542815	33.83379461	-7.963572537	0	down	ssc:102157864	uncharacterized LOC102157864
LOC102167659	41789	ncRNA	4.062156798	89.94898935	-4.468789238	0	down	ssc:102167659	uncharacterized LOC102167659
LOC102167657	11938	ncRNA	0.196686901	309.2478103	-10.61864679	0	down	ssc:102167657	uncharacterized LOC102167657
LOC102164148	701	ncRNA	0.068518886	20.84157051	-8.248746575	1.86E-12	down	ssc:102164148	uncharacterized LOC102164148
LOC102165479	13711	ncRNA	3.580378918	104.8286965	-4.871777615	0	down	ssc:102165479	uncharacterized LOC102165479
LOC102166326	22096	ncRNA	0.342594432	25.53092388	-6.219600229	8.86E-13	down	ssc:102166326	uncharacterized LOC102166326
LOC100519182	47665	pseudo	1145.63089	458.6627906	1.320636521	0.007566356	up	ssc:100519182	Uncharacterized protein
LOC100738332	3189	ncRNA	627.4478711	106.9818362	2.552129732	0.02101125	up	ssc:100738332	uncharacterized LOC100738332
LOC102166320	9454	ncRNA	25.20678439	76.46067717	-1.600905891	1.05E-04	down	ssc:102166320	uncharacterized LOC102166320
LOC102165476	3618	ncRNA	1.087332438	221.1408049	-7.668028352	0	down	ssc:102165476	uncharacterized LOC102165476
LOC102167654	25741	ncRNA	1.419662141	2343.889987	-10.68914151	0	down	ssc:102167654	uncharacterized LOC102167654
LOC102165474	2340	ncRNA	1.261794949	35.80934066	-4.82678657	0	down	ssc:102165474	uncharacterized LOC102165474
LOC100739668	21195	ncRNA	146.2857245	32.60531612	2.165609876	8.41E-04	up	ssc:100739668	uncharacterized LOC100739668
LOC100154692	10092	pseudo	157.3397041	67.42394832	1.222549757	0.002180681	up		heterogeneous nuclear ribonucleoprotein A/B-like
LOC102158707	28220	ncRNA	0.187817142	14.42765057	-6.263363835	0.001775072	down	ssc:102158707	uncharacterized LOC102158707
LOC102158708	948	ncRNA	0	22.52797646	-20	9.81E-14	down	ssc:102158708	uncharacterized LOC102158708
LOC102158703	8048	ncRNA	0.068518886	14.22804116	-7.698019633	3.09E-06	down	ssc:102158703	uncharacterized LOC102158703
LOC102157854	10424	ncRNA	4.379636912	674.8750043	-7.267665241	0	down	ssc:102157854	uncharacterized LOC102157854
LOC102164139	7997	ncRNA	0.676319106	53.81381569	-6.314128685	0	down	ssc:102164139	uncharacterized LOC102164139
LOC102167646	1073	pseudo	15.71781567	83.81687093	-2.414839925	1.66E-09	down	ssc:102167646	guanine nucleotide binding protein (G protein), gamma 5 pseudogene
LOC102164137	4872	ncRNA	13.33868109	49.00557731	-1.87732993	2.38E-06	down	ssc:102164137	uncharacterized LOC102164137
LOC100523671	8977	pseudo	1.610919942	28.57496734	-4.148795146	2.76E-11	down		cadherin-15-like
LOC102167640	1778	ncRNA	5.283579831	515.9961898	-6.60970086	0	down	ssc:102167640	uncharacterized LOC102167640
LOC102166793	3760	ncRNA	0.539281333	34.03780716	-5.97995619	0	down	ssc:102166793	uncharacterized LOC102166793
LOC102163281	1388	ncRNA	0.662964474	188.445958	-8.151003571	0	down	ssc:102163281	uncharacterized LOC102163281
LOC102166792	26763	ncRNA	2.330092884	295.2208463	-6.985263321	0	down	ssc:102166792	uncharacterized LOC102166792
LOC102167642	1079	ncRNA	2.41092219	173.3666415	-6.168097427	0	down	ssc:102167642	uncharacterized LOC102167642
LOC102165463	18228	ncRNA	0.579695986	44.97376082	-6.277643226	0	down	ssc:102165463	uncharacterized LOC102165463
LOC102166795	50554	ncRNA	0.128168014	14.14291362	-6.785899289	2.20E-05	down	ssc:102166795	uncharacterized LOC102166795
LOC102157847	2584	ncRNA	0.40224356	74.5379689	-7.533762374	0	down	ssc:102157847	uncharacterized LOC102157847
LOC102157843	12037	ncRNA	0.330734758	13.19770437	-5.318468523	0.01867636	down	ssc:102157843	uncharacterized LOC102157843
LOC102166305	1293	ncRNA	0.196686901	18.00594275	-6.51642845	5.06E-07	down	ssc:102166305	uncharacterized LOC102166305
LOC102163278	2669	ncRNA	5.342635491	497.4956267	-6.540988443	0	down	ssc:102163278	uncharacterized LOC102163278
LOC102165456	16764	ncRNA	0.877390893	368.0298455	-8.71238732	0	down	ssc:102165456	uncharacterized LOC102165456
LOC102166308	3045	ncRNA	0.453022929	60.22773563	-7.054700138	0	down	ssc:102166308	uncharacterized LOC102166308
LOC102166781	3396	ncRNA	0	52.41654984	-20	0	down	ssc:102166781	uncharacterized LOC102166781
LOC102166780	386	pseudo	0.196686901	15.08665516	-6.261228296	1.16E-04	down		ribosomal protein L36 pseudogene
LOC102163273	19441	ncRNA	0.059649128	17.06220121	-8.160087027	1.04E-08	down	ssc:102163273	uncharacterized LOC102163273
LOC102167633	4575	pseudo	0	35.92675796	-20	0	down		alkaline ceramidase 3-like
LOC102166301	38449	ncRNA	0.24746627	55.50168936	-7.80915598	0	down	ssc:102166301	uncharacterized LOC102166301
LOC102166785	4086	ncRNA	0.128168014	92.86680922	-9.500982991	0	down	ssc:102166785	uncharacterized LOC102166785
LOC102161098	1291	ncRNA	0.187817142	26.30881348	-7.130073633	1.55E-15	down	ssc:102161098	uncharacterized LOC102161098
LOC102161099	3821	ncRNA	1.476772098	28.94042869	-4.292567187	8.41E-08	down	ssc:102161099	uncharacterized LOC102161099
LOC102160154	1061	ncRNA	0.196686901	19.52502905	-6.633280008	1.94E-09	down	ssc:102160154	uncharacterized LOC102160154
LOC102163663	2392	ncRNA	0.202566744	431.0888057	-11.05537204	0	down	ssc:102163663	uncharacterized LOC102163663
LOC102165844	4197	ncRNA	0.119298255	44.94147106	-8.557330593	0	down	ssc:102165844	uncharacterized LOC102165844
LOC102165841	1407	ncRNA	0.196686901	80.44552674	-8.675967513	0	down	ssc:102165841	uncharacterized LOC102165841
LOC102162335	1880	ncRNA	1.255915105	138.8063273	-6.788190576	0	down	ssc:102162335	uncharacterized LOC102162335
LOC102164510	217943	ncRNA	1.486586083	1115.75788	-9.551805274	0	down	ssc:102164510	uncharacterized LOC102164510
LOC100525430	850	pseudo	0	26.39247331	-20	0	down		desumoylating isopeptidase 2 pseudogene
LOC102164516	5083	ncRNA	0.059649128	22.90077639	-8.584679754	1.07E-13	down	ssc:102164516	uncharacterized LOC102164516
LOC102161006	5144	ncRNA	0.128168014	25.53092388	-7.638065669	7.55E-15	down	ssc:102161006	uncharacterized LOC102161006
LOC102165848	31965	ncRNA	23.12699046	115.7323604	-2.323142875	2.22E-16	down	ssc:102165848	uncharacterized LOC102165848
LOC102164514	6901	ncRNA	1.369333517	103.026341	-6.233395558	0	down	ssc:102164514	uncharacterized LOC102164514
LOC100515624	723	pseudo	0.274075546	19.809766	-6.175494418	3.06E-11	down		60S ribosomal protein L23a-like
LOC102161480	2317	ncRNA	1.3589688	249.985832	-7.523190187	0	down	ssc:102161480	uncharacterized LOC102161480
LOC102160151	2161	ncRNA	0	12.99515953	-20	7.80E-05	down	ssc:102160151	uncharacterized LOC102160151
LOC102163661	2665	ncRNA	2.782565082	302.6107975	-6.764904224	0	down	ssc:102163661	uncharacterized LOC102163661
LOC100738767	20157	pseudo	31.89910447	9.333207527	1.773071043	0.022220623	up	ssc:100738767	transmembrane protein 132E-like
LOC102164508	5347	ncRNA	0.871511049	516.0402213	-9.209748847	0	down	ssc:102164508	uncharacterized LOC102164508
LOC102159169	32062	ncRNA	0.274075546	280.7565028	-10.00053011	0	down	ssc:102159169	uncharacterized LOC102159169
LOC102159154	4219	ncRNA	0	27.82643207	-20	0	down	ssc:102159154	uncharacterized LOC102159154
LOC102165833	18571	ncRNA	0.196686901	24.79119489	-6.977783121	2.75E-14	down	ssc:102165833	uncharacterized LOC102165833
LOC100523264	1389	pseudo	0	11.59202281	-20	0.027453407	down		eukaryotic translation initiation factor 3 subunit M-like
LOC102160146	23177	ncRNA	0.068518886	29.10921605	-8.730758566	0	down	ssc:102160146	uncharacterized LOC102160146
LOC102160147	3747	ncRNA	0.137037773	50.61125887	-8.528740939	0	down	ssc:102160147	uncharacterized LOC102160147
LOC102162326	23889	ncRNA	1.004063949	135.549465	-7.076824451	0	down	ssc:102162326	uncharacterized LOC102162326
LOC102165834	2203	ncRNA	0.46039773	365.5743562	-9.633068438	0	down	ssc:102165834	uncharacterized LOC102165834
LOC100521089	1840	pseudo	0.196686901	28.36655164	-7.172146094	0	down	ssc:100521089	Olfactory receptor
LOC100736595	2996	pseudo	0	14.79898278	-20	4.36E-06	down	ssc:100736595	Uncharacterized protein
LOC102164981	7073	ncRNA	1.390062949	255.6835064	-7.523065071	0	down	ssc:102164981	uncharacterized LOC102164981
LOC100737448	25856	pseudo	258.9748863	83.70679221	1.629395605	2.28E-06	up	ssc:100737448	Uncharacterized protein
LOC102159158	3007	ncRNA	0.399253645	82.75571209	-7.695409507	0	down	ssc:102159158	uncharacterized LOC102159158
LOC102159157	3015	ncRNA	0.511177099	294.3637	-9.169560854	0	down	ssc:102159157	uncharacterized LOC102159157
LOC102163642	4992	ncRNA	0.128168014	40.24624683	-8.294674175	0	down	ssc:102163642	uncharacterized LOC102163642
LOC102164974	6761	ncRNA	0.059649128	158.3548398	-11.3743723	0	down	ssc:102164974	uncharacterized LOC102164974
LOC102162310	4597	ncRNA	1.641914105	96.28071718	-5.873796327	0	down	ssc:102162310	uncharacterized LOC102162310
LOC102164972	1819	ncRNA	0.068518886	32.14885637	-8.874049997	0	down	ssc:102164972	uncharacterized LOC102164972
LOC102161466	3980	ncRNA	0.059649128	41.02266872	-9.425704594	0	down	ssc:102161466	uncharacterized LOC102161466
LOC102162796	28563	ncRNA	0.411113319	363.0073205	-9.786246816	0	down	ssc:102162796	uncharacterized LOC102162796
LOC102163646	2238	ncRNA	0.998084119	46.74822974	-5.549606512	0	down	ssc:102163646	uncharacterized LOC102163646
LOC102160136	3032	ncRNA	0.253346113	13.11404454	-5.693859194	6.99E-11	down	ssc:102160136	uncharacterized LOC102160136
LOC102159140	21367	pseudo	11.84462667	44.39988377	-1.906323173	8.92E-06	down	ssc:102159140	sacsin-like
LOC102162316	1287	ncRNA	0.732978318	400.7070797	-9.09456176	0	down	ssc:102162316	uncharacterized LOC102162316
LOC102160139	29323	ncRNA	0.932655134	1099.80087	-10.20361099	0	down	ssc:102160139	uncharacterized LOC102160139
LOC102164971	7681	ncRNA	0.068518886	20.64049339	-8.234760036	1.85E-12	down	ssc:102164971	uncharacterized LOC102164971
LOC102163638	2142	ncRNA	0.068518886	14.22510573	-7.697721955	4.19E-10	down	ssc:102163638	uncharacterized LOC102163638
LOC102162307	7639	ncRNA	0.068518886	22.98737164	-8.390124098	0	down	ssc:102162307	uncharacterized LOC102162307
LOC102164969	442	pseudo	0	35.43947617	-20	0	down		ferritin, light polypeptide pseudogene
LOC102158283	2742	ncRNA	0.196686901	21.01035788	-6.739056049	2.07E-09	down	ssc:102158283	uncharacterized LOC102158283
LOC102162302	2631	ncRNA	0.068518886	217.3570324	-11.63127745	0	down	ssc:102162302	uncharacterized LOC102162302
LOC102160123	5951	ncRNA	0.33810956	314.6592801	-9.862083969	0	down	ssc:102160123	uncharacterized LOC102160123
LOC102158285	2798	ncRNA	0.411113319	105.079676	-7.997731831	0	down	ssc:102158285	uncharacterized LOC102158285
LOC102162304	1456	pseudo	0.128168014	19.77894396	-7.269785324	3.66E-15	down		interferon-induced very large GTPase 1-like
LOC102161456	31923	ncRNA	1.270764694	589.6770124	-8.858084231	0	down	ssc:102161456	uncharacterized LOC102161456
LOC102161457	1448	ncRNA	1.081452594	121.9481387	-6.817153502	0	down	ssc:102161457	uncharacterized LOC102161457
LOC102160126	16375	ncRNA	0.059649128	11.59202281	-7.602415583	1.16E-07	down	ssc:102160126	uncharacterized LOC102160126
LOC102160128	1066	ncRNA	0.748278652	100.1907132	-7.064957458	0	down	ssc:102160128	uncharacterized LOC102160128
LOC100620355	31758	pseudo	179.7646886	40.82452703	2.138601582	0.029194892	up		FRAS1-related extracellular matrix protein 1-like
LOC100517819	6681	pseudo	61.19186015	6.700124605	3.191079925	0.029154764	up	ssc:100517819	glycine cleavage system H protein, mitochondrial-like
LOC102160120	5612	ncRNA	0.274075546	195.4807219	-9.478237012	0	down	ssc:102160120	uncharacterized LOC102160120
LOC102168083	18078	ncRNA	0.40224356	162.9722751	-8.662341515	0	down	ssc:102168083	uncharacterized LOC102168083
LOC102168081	6814	ncRNA	0.205556659	47.89304841	-7.864136345	0	down	ssc:102168081	uncharacterized LOC102168081
LOC100155512	937	pseudo	0.324854915	40.78930184	-6.972251472	0	down		olfactory receptor 6C2-like
LOC102159138	1165	ncRNA	0.137037773	17.43059799	-6.990904644	8.29E-10	down	ssc:102159138	uncharacterized LOC102159138
LOC102158288	16511	ncRNA	0	42.22179288	-20	0	down	ssc:102158288	uncharacterized LOC102158288
LOC102163224	13039	ncRNA	0.193696986	137.9726645	-9.476365248	0	down	ssc:102163224	uncharacterized LOC102163224
LOC102160199	3397	ncRNA	0	95.78316138	-20	0	down	ssc:102160199	uncharacterized LOC102160199
LOC102161046	11187	ncRNA	2.07365687	1501.830362	-9.500328958	0	down	ssc:102161046	uncharacterized LOC102161046
LOC102166733	987	ncRNA	4.962616321	292.3910894	-5.880654617	0	down	ssc:102166733	uncharacterized LOC102166733
LOC102165885	25640	ncRNA	0.187817142	21.58276721	-6.844407298	3.33E-16	down	ssc:102165885	uncharacterized LOC102165885
LOC102165886	4178	pseudo	0.128168014	78.57125311	-9.259821494	0	down		synapsin-1-like
LOC102166739	3558	ncRNA	0.187817142	71.82269387	-8.578967213	0	down	ssc:102166739	uncharacterized LOC102166739
LOC102164559	1618	pseudo	1.091817311	199.7987431	-7.515672221	0	down		lanC-like protein 1-like
LOC102160191	3854	ncRNA	0	35.97959574	-20	0	down	ssc:102160191	uncharacterized LOC102160191
LOC100623857	153505	pseudo	0.274075546	135.2559218	-8.946902433	0	down		uncharacterized LOC100623857
LOC102160193	1833	ncRNA	0.604810304	248.1849442	-8.680717164	0	down	ssc:102160193	uncharacterized LOC102160193
LOC100155946	8123	pseudo	0.24746627	12.90856427	-5.704952844	3.27E-07	down		ATP synthase subunit beta, mitochondrial-like
LOC102164545	1706	pseudo	0.059649128	41.02413643	-9.42575621	0	down		40S ribosomal protein S3a-like
LOC102163213	6838	ncRNA	0.059649128	63.69301366	-10.06041838	0	down	ssc:102163213	uncharacterized LOC102163213
LOC102165877	15001	ncRNA	0.068518886	16.20065178	-7.885334436	3.40E-13	down	ssc:102165877	uncharacterized LOC102165877
LOC102159199	105775	ncRNA	0	9.990744399	-20	0.024315427	down	ssc:102159199	uncharacterized LOC102159199
LOC102159194	836	ncRNA	0.977454673	46.54128175	-5.573337331	0	down	ssc:102159194	uncharacterized LOC102159194
LOC102159195	3126	pseudo	0.655589673	6.211375099	-3.244047659	0.024236	down		nexilin-like
LOC102162369	7124	ncRNA	1.400427665	1103.079748	-9.621453912	0	down	ssc:102162369	uncharacterized LOC102162369
LOC100524157	17833	pseudo	0.195191943	25.36360423	-7.021722456	2.80E-14	down		protein FAM49B-like
LOC102165878	3849	ncRNA	1.982069354	16.85965637	-3.088495783	1.64E-05	down	ssc:102165878	uncharacterized LOC102165878
LOC102163218	1519	ncRNA	1.898250133	13.6526964	-2.846443896	0.002486871	down	ssc:102163218	uncharacterized LOC102163218
LOC102160180	4732	ncRNA	0.128168014	37.61609934	-8.197170179	0	down	ssc:102160180	uncharacterized LOC102160180
LOC102163690	1437	ncRNA	0.26371083	25.07593184	-6.571202685	2.72E-12	down	ssc:102163690	uncharacterized LOC102163690
LOC102164542	1355	ncRNA	0.810366964	199.5521668	-7.943974868	0	down	ssc:102164542	uncharacterized LOC102164542
LOC102163692	7839	ncRNA	0.059649128	78.20285634	-10.35650455	0	down	ssc:102163692	uncharacterized LOC102163692
LOC102160184	11489	ncRNA	2.607509104	42.79420221	-4.036671158	9.99E-16	down	ssc:102160184	uncharacterized LOC102160184
LOC102163695	1311	ncRNA	1.152961396	234.1300935	-7.665822362	0	down	ssc:102163695	uncharacterized LOC102163695
LOC102161032	12406	ncRNA	0.512672057	125.5220277	-7.935688583	0	down	ssc:102161032	uncharacterized LOC102161032
LOC102165871	2043	ncRNA	0.341099475	43.74087918	-7.002645875	0	down	ssc:102165871	uncharacterized LOC102165871
LOC100516983	715	pseudo	0.196686901	22.03775924	-6.807932854	2.48E-10	down		arginine-fifty homeobox pseudogene
LOC102161023	2830	ncRNA	0.119298255	37.04369001	-8.278511061	0	down	ssc:102161023	uncharacterized LOC102161023
LOC102160177	3826	ncRNA	0.068518886	126.0929693	-10.84569851	0	down	ssc:102160177	uncharacterized LOC102160177
LOC102159188	6720	ncRNA	9.840811891	1180.15393	-6.905981984	0	down	ssc:102159188	uncharacterized LOC102159188
LOC102163685	23020	ncRNA	2.254649942	517.0896384	-7.841367128	0	down	ssc:102163685	uncharacterized LOC102163685
LOC102159186	14301	ncRNA	0	15.91444712	-20	2.32E-07	down	ssc:102159186	uncharacterized LOC102159186
LOC102165867	913	ncRNA	0	19.32395193	-20	1.72E-12	down	ssc:102165867	uncharacterized LOC102165867
LOC102164537	4456	ncRNA	1.33928358	217.9250386	-7.346226685	0	down	ssc:102164537	uncharacterized LOC102164537
LOC102163680	1013	ncRNA	3.362161081	772.7379196	-7.844446539	0	down	ssc:102163680	uncharacterized LOC102163680
LOC100517863	2156	pseudo	0.128168014	30.05589302	-7.873467811	0	down		baculoviral IAP repeat-containing protein 1-like
LOC102166702	2417	ncRNA	1.722292665	38.55984088	-4.484696876	6.11E-15	down	ssc:102166702	uncharacterized LOC102166702
LOC102165854	4228	ncRNA	0	10.85082611	-20	0.001336561	down	ssc:102165854	uncharacterized LOC102165854
LOC102166701	8799	ncRNA	0	29.31176089	-20	0	down	ssc:102166701	uncharacterized LOC102166701
LOC102161014	8625	ncRNA	0.137037773	85.71022487	-9.288749901	0	down	ssc:102161014	uncharacterized LOC102161014
LOC102162348	1204	ncRNA	0.059649128	38.73009596	-9.342738321	0	down	ssc:102162348	uncharacterized LOC102162348
LOC102159173	1810	ncRNA	0.26371083	64.09223247	-7.925048895	0	down	ssc:102159173	uncharacterized LOC102159173
LOC102165859	6098	pseudo	0	35.63908557	-20	0	down		coiled-coil domain-containing protein 58-like
LOC100517858	26172	pseudo	413.1402215	89.20779265	2.211389876	0.015948053	up	ssc:100517858	deleted in autism protein 1-like
LOC102161493	5033	ncRNA	0.137037773	34.32401183	-7.968500766	0	down	ssc:102161493	uncharacterized LOC102161493
LOC102165851	10185	ncRNA	0.537786375	199.8398392	-8.5375953	0	down	ssc:102165851	uncharacterized LOC102165851
LOC100737866	593	pseudo	0	46.08628972	-20	0	down		interferon alpha-1-like
LOC102159682	10812	ncRNA	0.597435503	94.14372235	-7.299938113	0	down	ssc:102159682	uncharacterized LOC102159682
LOC102161520	9427	ncRNA	0.265205787	36.38174999	-7.099958872	0	down	ssc:102161520	uncharacterized LOC102161520
LOC102159681	19179	ncRNA	0.128168014	30.25550243	-7.883017467	0	down	ssc:102159681	uncharacterized LOC102159681
LOC102162854	1107	ncRNA	1.029728999	66.89557048	-6.021574076	0	down	ssc:102162854	uncharacterized LOC102162854
LOC102160676	4547	ncRNA	0.935545063	101.3369996	-6.759138158	0	down	ssc:102160676	uncharacterized LOC102160676
LOC102162853	72449	ncRNA	0.470762446	77.12408491	-7.356038418	0	down	ssc:102162853	uncharacterized LOC102162853
LOC100153710	2394	pseudo	0.274075546	22.15517654	-6.336926402	4.40E-12	down		60S ribosomal protein L23a-like
LOC100621638	9369	pseudo	0.068518886	31.66010687	-8.851948704	0	down		small ubiquitin-related modifier 2-like
LOC100737953	836	pseudo	0.579695986	306.2712818	-9.045297886	0	down		interferon tau-11-like
LOC100517767	10903	ncRNA	8.245400318	105.0840791	-3.67181076	0	down	ssc:100517767	uncharacterized LOC100517767
LOC102162847	2772	ncRNA	3.474635267	236.6296143	-6.089625283	0	down	ssc:102162847	uncharacterized LOC102162847
LOC102161517	13583	ncRNA	0.265205787	87.85896144	-8.371933379	0	down	ssc:102161517	uncharacterized LOC102161517
LOC102159684	4755	ncRNA	0.265205787	215.0042833	-9.663037429	0	down	ssc:102159684	uncharacterized LOC102159684
LOC102158355	1968	ncRNA	5.064525817	144.7887387	-4.837378389	0	down	ssc:102158355	uncharacterized LOC102158355
LOC102162841	70596	ncRNA	0.137037773	30.82937948	-7.813588431	0	down	ssc:102162841	uncharacterized LOC102162841
LOC100152879	6877	pseudo	2.602573486	958.2484452	-8.524317042	0	down		proteasome subunit alpha type-5-like
LOC102157493	96069	ncRNA	0.254841071	5.266165845	-4.369083247	0.023962865	down	ssc:102157493	uncharacterized LOC102157493
LOC100152874	562	pseudo	0.137037773	29.68456082	-7.758995348	0	down		interferon omega-1-like
LOC102161997	9618	ncRNA	0.332229716	62.20034625	-7.548597681	0	down	ssc:102161997	uncharacterized LOC102161997
LOC102161513	10962	ncRNA	1.621184672	215.2978265	-7.053141505	0	down	ssc:102161513	uncharacterized LOC102161513
LOC102168144	2830	ncRNA	0	9.990744399	-20	0.024315427	down	ssc:102168144	uncharacterized LOC102168144
LOC102167296	38552	ncRNA	0.399253645	27.05001018	-6.082179748	0	down	ssc:102167296	uncharacterized LOC102167296
LOC100738812	2097	ncRNA	0.528916617	39.78978708	-6.233214069	0	down	ssc:100738812	uncharacterized LOC100738812
LOC102168148	50588	ncRNA	0.341099475	22.52797646	-6.045381388	2.87E-09	down	ssc:102168148	uncharacterized LOC102168148
LOC102168147	13072	ncRNA	4.880449295	97.8100775	-4.324897242	0	down	ssc:102168147	uncharacterized LOC102168147
LOC102167291	2706	ncRNA	0.607700233	113.5043672	-7.545172247	0	down	ssc:102167291	uncharacterized LOC102167291
LOC100737967	433	pseudo	0.059649128	37.90230401	-9.311568794	0	down		family with sequence similarity 32, member A pseudogene
LOC100738817	998	pseudo	0.245971312	117.1986089	-8.896249669	0	down	ssc:100738817	60S ribosomal protein L23a-like
LOC100736638	6678	ncRNA	8.432766715	410.3646525	-5.604756613	0	down	ssc:100736638	uncharacterized LOC100736638
LOC102167294	3291	ncRNA	4.865542456	372.1071612	-6.256973686	0	down	ssc:102167294	uncharacterized LOC102167294
LOC102158349	923	ncRNA	1.112997488	61.37842516	-5.785209388	0	down	ssc:102158349	uncharacterized LOC102158349
LOC100521808	2127	ncRNA	27.53573308	159.5583671	-2.534707342	0	down	ssc:100521808	uncharacterized LOC100521808
LOC102158343	2615	ncRNA	0.324854915	53.24580951	-7.356728646	0	down	ssc:102158343	uncharacterized LOC102158343
LOC102157498	12033	ncRNA	0	24.87485472	-20	2.22E-16	down	ssc:102157498	uncharacterized LOC102157498
LOC102159661	11069	ncRNA	0.342594432	667.9928829	-10.92911531	0	down	ssc:102159661	uncharacterized LOC102159661
LOC102161982	3018	ncRNA	2.410371458	260.3757952	-6.755196035	0	down	ssc:102161982	uncharacterized LOC102161982
LOC102162830	3410	ncRNA	0.50230734	20.55389813	-5.354697865	1.34E-06	down	ssc:102162830	uncharacterized LOC102162830
LOC102160652	30654	ncRNA	8.638180652	47.31770364	-2.453580667	6.23E-10	down	ssc:102160652	uncharacterized LOC102160652
LOC102162832	73979	pseudo	82.73226283	25.19481686	1.715323073	0.003284686	up	ssc:102162832	transcription factor SOX-5-like
LOC102161985	1527	ncRNA	10.71341795	932.3432537	-6.44337047	0	down	ssc:102161985	uncharacterized LOC102161985
LOC102162833	1479	pseudo	0.187817142	74.45430908	-8.630882796	0	down		GA binding protein transcription factor, alpha subunit 60kDa pseudogene
LOC102161503	4616	ncRNA	0.135542815	25.44873177	-7.552701308	3.66E-15	down	ssc:102161503	uncharacterized LOC102161503
LOC102168132	23303	pseudo	0.272580588	20.55536585	-6.236688414	6.19E-10	down		inositol polyphosphate 1-phosphatase-like
LOC100736604	903	pseudo	0.059649128	64.74976934	-10.0841583	0	down		motile sperm domain-containing protein 1-like
LOC102167280	1949	ncRNA	0	41.27658363	-20	0	down	ssc:102167280	uncharacterized LOC102167280
LOC102162824	9226	ncRNA	5.666546179	74.28552171	-3.712539486	0	down	ssc:102162824	uncharacterized LOC102162824
LOC102159664	4644	ncRNA	0.068518886	106.688293	-10.60461255	0	down	ssc:102159664	uncharacterized LOC102159664
LOC102162829	12511	pseudo	0.26371083	98.32964904	-8.542525865	0	down		dnaJ homolog subfamily A member 1-like
LOC102157484	40460	ncRNA	7.001895618	55.9933743	-2.999438663	5.22E-12	down	ssc:102157484	uncharacterized LOC102157484
LOC102157472	5549	ncRNA	0.128168014	7.356193761	-5.84285131	6.55E-04	down	ssc:102157472	uncharacterized LOC102157472
LOC102168129	13987	ncRNA	0.137037773	49.37984495	-8.493204886	0	down	ssc:102168129	uncharacterized LOC102168129
LOC102160645	13705	ncRNA	0.059649128	13.19770437	-7.789570251	5.33E-05	down	ssc:102160645	uncharacterized LOC102160645
LOC102165098	22206	ncRNA	5.441204314	59.65826173	-3.454724036	0	down	ssc:102165098	uncharacterized LOC102165098
LOC100515112	16743	ncRNA	5.455953916	185.9361633	-5.090832123	0	down	ssc:100515112	uncharacterized LOC100515112
LOC102165090	36586	ncRNA	0.400748602	43.54126977	-6.763542181	0	down	ssc:102165090	uncharacterized LOC102165090
LOC102158329	560	ncRNA	0.128168014	42.13666534	-8.36089607	0	down	ssc:102158329	uncharacterized LOC102158329
LOC102167272	12596	ncRNA	0.187817142	38.27363621	-7.67087842	0	down	ssc:102167272	uncharacterized LOC102167272
LOC102159659	1345	ncRNA	0.260720914	22.15517654	-6.408993695	4.07E-12	down	ssc:102159659	uncharacterized LOC102159659
LOC100517777	6479	ncRNA	17.4684835	3794.871319	-7.763152787	0	down	ssc:100517777	uncharacterized LOC100517777
LOC102159657	533	ncRNA	0.196686901	34.60874878	-7.459092097	0	down	ssc:102159657	uncharacterized LOC102159657
LOC102160638	2441	ncRNA	1.434862488	29.22810107	-4.348371715	4.47E-09	down	ssc:102160638	uncharacterized LOC102160638
LOC102162817	2434	ncRNA	0.274075546	139.6898925	-8.99343831	0	down	ssc:102162817	uncharacterized LOC102162817
LOC102159242	3163	ncRNA	0.059649128	24.70459964	-8.69406292	6.00E-15	down	ssc:102159242	uncharacterized LOC102159242
LOC102160231	7347	ncRNA	2.174764863	649.8592489	-8.223124049	0	down	ssc:102160231	uncharacterized LOC102160231
LOC102163740	4562	ncRNA	0.196686901	37.32989467	-7.568286751	0	down	ssc:102163740	uncharacterized LOC102163740
LOC102163743	1206	ncRNA	2.258484097	2613.710536	-10.1765289	0	down	ssc:102163743	uncharacterized LOC102163743
LOC102163742	1812	ncRNA	9.001053772	243.4970585	-4.757666624	0	down	ssc:102163742	uncharacterized LOC102163742
LOC102160234	6749	ncRNA	0.539281333	423.1557995	-9.615935128	0	down	ssc:102160234	uncharacterized LOC102160234
LOC102163744	1782	ncRNA	0.137037773	46.25801252	-8.398985861	0	down	ssc:102163744	uncharacterized LOC102163744
LOC102162416	8205	ncRNA	3.961148792	160.0441812	-5.336407521	0	down	ssc:102162416	uncharacterized LOC102162416
LOC102158391	11594	ncRNA	0.119298255	150.9986461	-10.30574695	0	down	ssc:102158391	uncharacterized LOC102158391
LOC100620741	3327	pseudo	0.265205787	210.2033835	-9.630457919	0	down		40S ribosomal protein S27-like
LOC102168193	47680	ncRNA	3.757380599	515.6263253	-7.100454853	0	down	ssc:102168193	uncharacterized LOC102168193
LOC102168190	3564	ncRNA	0.330734758	21.38169009	-6.01455741	2.68E-14	down	ssc:102168190	uncharacterized LOC102168190
LOC102168196	7644	ncRNA	0.265205787	58.25218958	-7.779056212	0	down	ssc:102168196	uncharacterized LOC102168196
LOC100626048	21815	pseudo	55.31757374	19.61162431	1.496028851	0.00146833	up	ssc:100626048	zinc finger protein 350-like
LOC100515147	837	pseudo	0.40224356	22.90077639	-5.831183376	7.26E-10	down		ATPase, Na+/K+ transporting, beta 3 polypeptide pseudogene
LOC100737919	2266	ncRNA	10.70361848	44.23256412	-2.047010278	0.040005081	down	ssc:100737919	uncharacterized LOC100737919
LOC102162407	5902	ncRNA	0.068518886	16.40319662	-7.903259571	1.88E-07	down	ssc:102162407	uncharacterized LOC102162407
LOC102160229	4219	ncRNA	0.204061702	200.2962989	-9.938914604	0	down	ssc:102160229	uncharacterized LOC102160229
LOC102159249	401	ncRNA	0.128168014	27.91302732	-7.766758526	0	down	ssc:102159249	uncharacterized LOC102159249
LOC102162408	12828	ncRNA	0.068518886	32.43506104	-8.886836733	0	down	ssc:102162408	uncharacterized LOC102162408
LOC102158397	1908	ncRNA	0.128168014	32.51872086	-7.987090434	0	down	ssc:102158397	uncharacterized LOC102158397
LOC102160221	1804	ncRNA	0.187817142	12.99369181	-6.11233884	4.08E-07	down	ssc:102160221	uncharacterized LOC102160221
LOC102162882	61437	ncRNA	0.068518886	34.29172207	-8.967142935	0	down	ssc:102162882	uncharacterized LOC102162882
LOC102163731	1868	ncRNA	0.262215872	8.878215495	-5.081442806	7.66E-05	down	ssc:102163731	uncharacterized LOC102163731
LOC102160224	398	ncRNA	0.204061702	34.40913937	-7.397642554	0	down	ssc:102160224	uncharacterized LOC102160224
LOC102161555	2209	ncRNA	0.059649128	51.75901296	-9.76109335	0	down	ssc:102161555	uncharacterized LOC102161555
LOC102165913	5322	ncRNA	5.684836428	60.31139545	-3.407239872	1.18E-14	down	ssc:102165913	uncharacterized LOC102165913
LOC102162403	6987	ncRNA	0.135542815	228.6569797	-10.7202206	0	down	ssc:102162403	uncharacterized LOC102162403
LOC102162886	17499	ncRNA	1.138111807	240.5469489	-7.723532396	0	down	ssc:102162886	uncharacterized LOC102162886
LOC102165912	7550	ncRNA	0	56.27664353	-20	0	down	ssc:102165912	uncharacterized LOC102165912
LOC102162880	5637	ncRNA	29.42175181	152.6116662	-2.374910197	0	down	ssc:102162880	uncharacterized LOC102162880
LOC102160217	5469	ncRNA	0.067023929	46.91554939	-9.451174185	0	down	ssc:102160217	uncharacterized LOC102160217
LOC102163727	13305	ncRNA	5.666546179	629.0000657	-6.794446693	0	down	ssc:102163727	uncharacterized LOC102163727
LOC102163726	8771	ncRNA	0	20.06514862	-20	3.55E-11	down	ssc:102163726	uncharacterized LOC102163726
LOC102158387	6844	ncRNA	0	112.3610162	-20	0	down	ssc:102158387	uncharacterized LOC102158387
LOC102158389	13563	ncRNA	0.604810304	440.9034242	-9.509764247	0	down	ssc:102158389	uncharacterized LOC102158389
LOC102161540	5204	ncRNA	0.578201028	26.39247331	-5.512411572	1.38E-10	down	ssc:102161540	uncharacterized LOC102161540
LOC102159220	21770	ncRNA	0.128168014	59.85640342	-8.867325519	0	down	ssc:102159220	uncharacterized LOC102159220
LOC102159221	1133	ncRNA	0.205556659	70.01887062	-8.41206387	0	down	ssc:102159221	uncharacterized LOC102159221
LOC102160210	7426	ncRNA	5.796759882	933.9636124	-7.331975806	0	down	ssc:102160210	uncharacterized LOC102160210
LOC102160212	2240	ncRNA	0.068518886	12.62382732	-7.525431956	9.39E-04	down	ssc:102160212	uncharacterized LOC102160212
LOC102160698	4020	ncRNA	0	23.55831326	-20	5.11E-15	down	ssc:102160698	uncharacterized LOC102160698
LOC102165900	4090	ncRNA	0.649709829	493.676629	-9.569555101	0	down	ssc:102165900	uncharacterized LOC102165900
LOC102160699	18417	ncRNA	0.059649128	40.24918226	-9.398242717	0	down	ssc:102160699	uncharacterized LOC102160699
LOC102162877	1088	ncRNA	8.603352335	261.840576	-4.927645949	0	down	ssc:102162877	uncharacterized LOC102162877
LOC100518679	3686	ncRNA	198.3471808	68.82121417	1.527102642	0.028007767	up	ssc:100518679	uncharacterized LOC100518679
LOC102160206	7118	ncRNA	0.256336028	458.0184632	-10.80315378	0	down	ssc:102160206	uncharacterized LOC102160206
LOC102163718	3222	ncRNA	0.059649128	44.48501131	-9.542602564	0	down	ssc:102163718	uncharacterized LOC102163718
LOC102160209	34741	pseudo	3.903838862	37.52803637	-3.265003395	4.13E-08	down	ssc:102160209	sodium/potassium/calcium exchanger 1-like
LOC102158377	528	ncRNA	0.205556659	18.75007488	-6.511216436	3.15E-08	down	ssc:102158377	uncharacterized LOC102158377
LOC102158361	15152	ncRNA	0.137037773	95.49989215	-9.444781683	0	down	ssc:102158361	uncharacterized LOC102158361
LOC102159210	1236	ncRNA	0.341099475	18.29361513	-5.745003861	5.65E-07	down	ssc:102159210	uncharacterized LOC102159210
LOC102160200	7564	ncRNA	0.187817142	14.42765057	-6.263363835	0.001775072	down	ssc:102160200	uncharacterized LOC102160200
LOC102159691	11879	ncRNA	0.843406815	85.59280757	-6.665117082	0	down	ssc:102159691	uncharacterized LOC102159691
LOC102158363	17828	ncRNA	3.567224259	398.6185195	-6.804063012	0	down	ssc:102158363	uncharacterized LOC102158363
LOC102161532	3976	ncRNA	0.205556659	13.85670896	-6.074904729	1.08E-04	down	ssc:102161532	uncharacterized LOC102161532
LOC102160201	4890	ncRNA	0.068518886	37.9830284	-9.114637516	0	down	ssc:102160201	uncharacterized LOC102160201
LOC102162858	1787	pseudo	0.196686901	54.8456202	-8.123331729	0	down		guanine nucleotide-binding protein G(I)/G(S)/G(O) subunit gamma-5-like
LOC102160679	9438	ncRNA	0.196686901	37.90230401	-7.590240862	0	down	ssc:102160679	uncharacterized LOC102160679
LOC102163704	1773	ncRNA	4.589621194	430.5618956	-6.551701752	0	down	ssc:102163704	uncharacterized LOC102163704
LOC102161527	6294	ncRNA	9.509891673	48.18072079	-2.340955164	1.20E-04	down	ssc:102161527	uncharacterized LOC102161527
LOC102163706	674	ncRNA	0.059649128	19.32248421	-8.339563832	6.19E-10	down	ssc:102163706	uncharacterized LOC102163706
LOC102162859	1597	ncRNA	0.272580588	73.99931705	-8.084685321	0	down	ssc:102162859	uncharacterized LOC102162859
LOC102159697	3048	ncRNA	0.667449347	157.2114889	-7.879832583	0	down	ssc:102159697	uncharacterized LOC102159697
LOC102161921	15836	ncRNA	0.706369042	47.03003126	-6.057016365	0	down	ssc:102161921	uncharacterized LOC102161921
LOC102165043	878	ncRNA	0.059649128	35.55542575	-9.219352976	0	down	ssc:102165043	uncharacterized LOC102165043
LOC102164196	30966	ncRNA	0.315985156	12.70895486	-5.329844797	1.28E-06	down	ssc:102164196	uncharacterized LOC102164196
LOC102164194	6257	ncRNA	0.137037773	79.83789222	-9.186356212	0	down	ssc:102164194	uncharacterized LOC102164194
LOC102165047	2242	ncRNA	0.068518886	17.43353342	-7.991147583	1.06E-08	down	ssc:102165047	uncharacterized LOC102165047
LOC102167225	1749	ncRNA	0.329239801	151.2569641	-8.843647103	0	down	ssc:102167225	uncharacterized LOC102167225
LOC102167224	2094	ncRNA	0.390383886	10.36354432	-4.730480173	1.39E-06	down	ssc:102167224	uncharacterized LOC102167224
LOC102166377	9812	ncRNA	2.695813197	53.15774653	-4.301487512	0	down	ssc:102166377	uncharacterized LOC102166377
LOC102161919	9653	ncRNA	0.068518886	18.09107029	-8.044560341	1.10E-08	down	ssc:102161919	uncharacterized LOC102161919
LOC102159608	92674	ncRNA	0.330734758	80.24004647	-7.922503958	0	down	ssc:102159608	uncharacterized LOC102159608
LOC102158758	97517	pseudo	0.119298255	8.473125814	-6.150249441	1.06E-05	down		uncharacterized LOC102158758
LOC102164190	3035	ncRNA	6.746603803	2160.316846	-8.322865766	0	down	ssc:102164190	uncharacterized LOC102164190
LOC102158754	8549	ncRNA	0.204061702	15.37285983	-6.235236322	1.18E-04	down	ssc:102158754	uncharacterized LOC102158754
LOC102161912	34224	ncRNA	1.880410629	129.6727292	-6.107683555	0	down	ssc:102161912	uncharacterized LOC102161912
LOC102161913	5752	pseudo	0.128168014	13.19770437	-6.686106931	3.55E-04	down		actin-related protein 3-like
LOC102158756	9341	ncRNA	0.400748602	25.81859626	-6.009569265	1.11E-16	down	ssc:102158756	uncharacterized LOC102158756
LOC102161915	2301	ncRNA	0.068518886	20.63902567	-8.234657445	3.48E-11	down	ssc:102161915	uncharacterized LOC102161915
LOC102158750	23313	ncRNA	0.970079872	43.24919424	-5.478425908	1.11E-16	down	ssc:102158750	uncharacterized LOC102158750
LOC100512907	1068857	ncRNA	241.4503573	117.6580041	1.03712713	5.78E-06	up	ssc:100512907	uncharacterized LOC100512907
LOC102167216	877	ncRNA	0.137037773	49.49579453	-8.496588529	0	down	ssc:102167216	uncharacterized LOC102167216
LOC102167693	37918	ncRNA	0.68219895	483.7812862	-9.469946715	0	down	ssc:102167693	uncharacterized LOC102167693
LOC102167692	5088	ncRNA	2.007183672	229.4099181	-6.836611315	0	down	ssc:102167692	uncharacterized LOC102167692
LOC100512901	939	pseudo	0.265205787	17.71827037	-6.06198171	3.03E-12	down		olfactory receptor 6C2-like
LOC102166366	22373	ncRNA	0.059649128	17.06073349	-8.159962919	1.94E-07	down	ssc:102166366	uncharacterized LOC102166366
LOC100524917	1159	pseudo	0.658579588	20.5509627	-4.963704369	5.16E-06	down		taste receptor type 2 member 40-like
LOC102161909	86701	ncRNA	60.3269353	1117.639493	-4.211508802	0	down	ssc:102161909	uncharacterized LOC102161909
LOC102164181	50638	ncRNA	2.103706806	99.61390075	-5.565341524	0	down	ssc:102164181	uncharacterized LOC102164181
LOC102158746	3170	ncRNA	0.545161177	674.1543557	-10.27218041	0	down	ssc:102158746	uncharacterized LOC102158746
LOC102157415	9441	ncRNA	0.453022929	80.78310147	-7.478325654	0	down	ssc:102157415	uncharacterized LOC102157415
LOC102157418	3517	ncRNA	0.205556659	37.98743155	-7.529842249	0	down	ssc:102157418	uncharacterized LOC102157418
LOC102157414	378	pseudo	0.134047858	23.67426284	-7.464427529	5.55E-16	down	ssc:102157414	ribosomal protein L39 pseudogene
LOC102161902	3959	ncRNA	0.508187184	8.301403015	-4.029923288	0.002369701	down	ssc:102161902	uncharacterized LOC102161902
LOC102157897	10233	ncRNA	1.734152339	656.8705293	-8.56523459	0	down	ssc:102157897	uncharacterized LOC102157897
LOC102158741	785	ncRNA	0.068518886	38.67872589	-9.140822851	0	down	ssc:102158741	uncharacterized LOC102158741
LOC102165029	3833	ncRNA	1.143047425	34.12146699	-4.899722507	1.93E-13	down	ssc:102165029	uncharacterized LOC102165029
LOC102167203	1288	ncRNA	0.196686901	94.63834272	-8.910380123	0	down	ssc:102167203	uncharacterized LOC102167203
LOC102164179	6367	ncRNA	0.315985156	15.1717827	-5.585390017	0.001517058	down	ssc:102164179	uncharacterized LOC102164179
LOC102165023	59809	ncRNA	6.458129413	214.1794268	-5.051559746	0	down	ssc:102165023	uncharacterized LOC102165023
LOC102158735	3768	ncRNA	0.324854915	46.20370702	-7.152069265	0	down	ssc:102158735	uncharacterized LOC102158735
LOC102158737	18079	ncRNA	0	55.04816504	-20	0	down	ssc:102158737	uncharacterized LOC102158737
LOC102165019	2143	ncRNA	0.332229716	16.11699196	-5.600257577	1.11E-04	down	ssc:102165019	uncharacterized LOC102165019
LOC102166348	5890	ncRNA	0.205556659	20.26475803	-6.623293028	9.58E-10	down	ssc:102166348	uncharacterized LOC102166348
LOC100151963	29322	pseudo	0.391878844	66.43323986	-7.405353776	0	down		guanylate-binding protein 6-like
LOC102166342	11917	ncRNA	0	311.9968428	-20	0	down	ssc:102166342	uncharacterized LOC102166342
LOC102166346	29965	ncRNA	0.451527971	38.56130859	-6.416194838	0	down	ssc:102166346	uncharacterized LOC102166346
LOC102165496	16267	ncRNA	20.85678941	86.17108777	-2.046686802	7.06E-11	down	ssc:102165496	uncharacterized LOC102165496
LOC100622096	446	pseudo	0	12.74124462	-20	3.85E-06	down		mago-nashi homolog B (Drosophila) pseudogene
LOC102157878	1523	ncRNA	0.119298255	24.70313192	-7.693977206	7.55E-15	down	ssc:102157878	uncharacterized LOC102157878
LOC102165490	10604	ncRNA	0.238596511	100.6794627	-8.720980762	0	down	ssc:102165490	uncharacterized LOC102165490
LOC102157877	2180	ncRNA	0.323359957	20.92376262	-6.015857462	1.31E-11	down	ssc:102157877	uncharacterized LOC102157877
LOC102157874	640	pseudo	0	19.23735667	-20	3.42E-11	down		ferritin, light polypeptide pseudogene
LOC102157876	43410	ncRNA	0	13.93890107	-20	8.27E-05	down	ssc:102157876	uncharacterized LOC102157876
LOC102158722	1833	ncRNA	1.592529707	110.210812	-6.112801668	0	down	ssc:102158722	uncharacterized LOC102158722
LOC100516041	326	pseudo	0.137037773	12.08224003	-6.462170532	3.50E-09	down		glutaredoxin (thioltransferase) pseudogene
LOC100737071	590	pseudo	0.128168014	17.4320657	-7.087563464	1.52E-06	down		ORM1-like protein 1-like
LOC102160630	55660	ncRNA	0.196686901	15.82785186	-6.33042078	5.34E-09	down	ssc:102160630	uncharacterized LOC102160630
LOC100737076	3276	ncRNA	33.10594965	6.868911971	2.268937014	1.26E-04	up	ssc:100737076	uncharacterized LOC100737076
LOC100739256	26518	pseudo	1.647793949	10.4794939	-2.668961291	0.002670895	down		uncharacterized LOC100739256
LOC102167266	3618	ncRNA	0.324854915	41.56278829	-6.9993531	0	down	ssc:102167266	uncharacterized LOC102167266
LOC100512951	8984	pseudo	70.17524295	324.8349567	-2.210672836	1.26E-12	down	ssc:100512951	transcription factor 7-like
LOC102165083	1679	ncRNA	0.195191943	154.9497382	-9.632691098	0	down	ssc:102165083	uncharacterized LOC102165083
LOC102159648	2008	ncRNA	0.068518886	59.56873104	-9.763837806	0	down	ssc:102159648	uncharacterized LOC102159648
LOC102165082	68384	ncRNA	0.059649128	155.3240058	-11.34649216	0	down	ssc:102165082	uncharacterized LOC102165082
LOC102160625	7228	ncRNA	0.374139326	23.27210859	-5.958882506	7.35E-10	down	ssc:102160625	uncharacterized LOC102160625
LOC102158315	11193	ncRNA	2.98164843	47.60537602	-3.996942442	2.22E-16	down	ssc:102158315	uncharacterized LOC102158315
LOC100516077	364	pseudo	0.059649128	17.63607826	-8.207813028	5.73E-10	down		V-type proton ATPase subunit G 1-like
LOC102159642	5301	ncRNA	3.556308812	28.82741454	-3.01898894	5.62E-07	down	ssc:102159642	uncharacterized LOC102159642
LOC100516075	926	pseudo	0	10.07587194	-20	0.024484713	down		C1GALT1-specific chaperone 1-like
LOC100739262	1511	pseudo	0.137037773	13.48244132	-6.620364334	0.006059821	down		nucleoporin p54-like
LOC100739260	13251	pseudo	21.72013867	93.06495091	-2.099204625	1.95E-07	down	ssc:100739260	sacsin-like
LOC102158780	2580	pseudo	0.128168014	64.09370019	-8.966002485	0	down		uncharacterized LOC102158780
LOC102165076	7988	ncRNA	63.3555225	11.50836298	2.460787749	4.89E-06	up	ssc:102165076	uncharacterized LOC102165076
LOC102168102	15043	ncRNA	0.196686901	48.38033019	-7.942375929	0	down	ssc:102168102	uncharacterized LOC102168102
LOC102168101	396	pseudo	0.137037773	20.35135329	-7.214407311	6.66E-16	down		lymphocyte antigen 6E-like
LOC102165074	2630	ncRNA	0.068518886	18.66347962	-8.089500567	1.12E-08	down	ssc:102165074	uncharacterized LOC102165074
LOC102167257	5296	pseudo	0.333724674	129.0694978	-8.595274028	0	down		programmed cell death protein 2-like
LOC102157459	198662	ncRNA	6.025285185	153.7990486	-4.673873241	0	down	ssc:102157459	uncharacterized LOC102157459
LOC102159635	1999	pseudo	0.059649128	27.05147789	-8.824990659	0	down		UPF0462 protein C4orf33-like
LOC102158787	12087	ncRNA	0.187817142	16.40026119	-6.448246239	4.07E-07	down	ssc:102158787	uncharacterized LOC102158787
LOC102158302	1183	ncRNA	1.229405815	61.83341719	-5.652353618	0	down	ssc:102158302	uncharacterized LOC102158302
LOC102158786	3056	ncRNA	8.240664673	1635.104866	-7.632406743	0	down	ssc:102158786	uncharacterized LOC102158786
LOC102159636	4337	pseudo	0.059649128	25.90519152	-8.762524494	0	down		transcription initiation factor TFIID subunit 10-like
LOC100624251	26513	pseudo	8.008849496	196.6035249	-4.617550369	0	down	ssc:100624251	voltage-dependent L-type calcium channel subunit beta-2-like
LOC100525801	3370	ncRNA	48.90917948	8.100325891	2.594053405	4.21E-04	up	ssc:100525801	uncharacterized LOC100525801
LOC102158788	9223	ncRNA	0.265205787	35.64055329	-7.070263667	0	down	ssc:102158788	uncharacterized LOC102158788
LOC102161949	850	ncRNA	1.108612602	90.39957823	-6.349488824	0	down	ssc:102161949	uncharacterized LOC102161949
LOC102158784	11946	ncRNA	1.717707806	236.4256017	-7.104757813	0	down	ssc:102158784	uncharacterized LOC102158784
LOC102160611	4876	ncRNA	0.128168014	55.79082946	-8.765847925	0	down	ssc:102160611	uncharacterized LOC102160611
LOC102165065	1058	ncRNA	0.126673057	10.93742137	-6.432019139	1.41E-09	down	ssc:102165065	uncharacterized LOC102165065
LOC102166397	32541	ncRNA	15.1666666	8570.819942	-9.14238538	0	down	ssc:102166397	uncharacterized LOC102166397
LOC102166395	4526	ncRNA	2.172325679	49.86419131	-4.520691837	0	down	ssc:102166395	uncharacterized LOC102166395
LOC100513825	1516	pseudo	0.128168014	46.08628972	-8.49015755	0	down	ssc:100513825	high mobility group protein B3-like
LOC102167245	2447	ncRNA	7.776032843	75.89120327	-3.286826452	0	down	ssc:102167245	uncharacterized LOC102167245
LOC102157449	14601	ncRNA	0	14.79898278	-20	4.36E-06	down	ssc:102157449	uncharacterized LOC102157449
LOC102159622	19223	ncRNA	0.128168014	15.74419203	-6.940639647	2.41E-05	down	ssc:102159622	uncharacterized LOC102159622
LOC102157441	1582	ncRNA	0.271085631	14.59937337	-5.751013994	4.21E-10	down	ssc:102157441	uncharacterized LOC102157441
LOC100738390	7086	pseudo	0.068518886	43.65428392	-9.315405816	0	down		ras-related protein R-Ras-like
LOC102160609	5389	pseudo	0.24746627	21.211435	-6.421466521	1.02E-08	down		craniofacial development protein 1-like
LOC102161930	1044	ncRNA	0.875895935	539.2506858	-9.265980917	0	down	ssc:102161930	uncharacterized LOC102161930
LOC102160601	18985	ncRNA	0.709358957	143.5617279	-7.660939618	0	down	ssc:102160601	uncharacterized LOC102160601
LOC100520572	3607	ncRNA	0.706369042	84.56687392	-6.903526723	0	down	ssc:100520572	uncharacterized LOC100520572
LOC102165055	1245	ncRNA	0.606305262	350.8179372	-9.176462456	0	down	ssc:102165055	uncharacterized LOC102165055
LOC102167232	16909	ncRNA	0.068518886	22.41202688	-8.353555707	7.77E-16	down	ssc:102167232	uncharacterized LOC102167232
LOC102165052	1821	ncRNA	2.440972126	25.44726405	-3.381982828	5.04E-09	down	ssc:102165052	uncharacterized LOC102165052
LOC100520570	84992	pseudo	52.33016722	147.7843475	-1.497778701	3.75E-09	down	ssc:100520570	protein SOGA2-like
LOC102165053	3513	ncRNA	0.196686901	164.0804009	-9.704286329	0	down	ssc:102165053	uncharacterized LOC102165053
LOC102166384	5148	ncRNA	1.409197438	263.3625977	-7.546032904	0	down	ssc:102166384	uncharacterized LOC102166384
LOC102167234	2571	ncRNA	1.674403225	940.2175513	-9.133203806	0	down	ssc:102167234	uncharacterized LOC102167234
LOC102166381	16908	ncRNA	0	17.26474605	-20	3.13E-11	down	ssc:102166381	uncharacterized LOC102166381
LOC100626895	563	pseudo	0.195191943	36.09701304	-7.530842147	0	down		60S ribosomal protein L35a-like
LOC100522754	8040	pseudo	0	42.13519762	-20	0	down		60S ribosomal protein L23a-like
LOC100624232	2378	ncRNA	0.068518886	149.938955	-11.09558593	0	down	ssc:100624232	uncharacterized LOC100624232
LOC102159614	16231	ncRNA	0.068518886	46.00556533	-9.391090975	0	down	ssc:102159614	uncharacterized LOC102159614
LOC102157433	17007	pseudo	0	31.4913195	-20	0	down		40S ribosomal protein S3a-like
LOC102159610	4992	ncRNA	0.46039773	330.1451541	-9.486004034	0	down	ssc:102159610	uncharacterized LOC102159610
LOC102158762	1736	ncRNA	0.187817142	304.7228412	-10.66395319	0	down	ssc:102158762	uncharacterized LOC102158762
LOC102164479	4020	ncRNA	0.46039773	19.60722116	-5.412360553	2.52E-09	down	ssc:102164479	uncharacterized LOC102164479
LOC102167989	11020	ncRNA	0.274075546	194.4210308	-9.47039496	0	down	ssc:102167989	uncharacterized LOC102167989
LOC102163146	4470	ncRNA	0.324854915	16.48538873	-5.665248564	1.01E-06	down	ssc:102163146	uncharacterized LOC102163146
LOC102167987	14849	ncRNA	0.26371083	23.38952589	-6.47076199	2.57E-12	down	ssc:102167987	uncharacterized LOC102167987
LOC102166655	596	ncRNA	0.674824148	123.9163461	-7.520639194	0	down	ssc:102166655	uncharacterized LOC102166655
LOC102167502	5314	ncRNA	0.458902773	198.8931622	-8.75958944	0	down	ssc:102167502	uncharacterized LOC102167502
LOC102167509	559	ncRNA	0.274075546	40.5324515	-7.208360015	0	down	ssc:102167509	uncharacterized LOC102167509
LOC100517092	4249	ncRNA	2.390743489	70.05409581	-4.872938151	0	down	ssc:100517092	Uncharacterized protein
LOC102167508	849	ncRNA	2.465986459	154.8352563	-5.972425326	0	down	ssc:102167508	uncharacterized LOC102167508
LOC102165328	8669	ncRNA	0.128168014	29.31469633	-7.837444036	0	down	ssc:102165328	uncharacterized LOC102165328
LOC102167506	166325	ncRNA	0	11.30581814	-20	0.026899447	down	ssc:102167506	uncharacterized LOC102167506
LOC102166650	73554	ncRNA	0.725603517	56.3647065	-6.279466824	0	down	ssc:102166650	uncharacterized LOC102166650
LOC102167980	2831	ncRNA	4.280968103	35.15473922	-3.037710201	5.20E-06	down	ssc:102167980	uncharacterized LOC102167980
LOC102167982	3560	ncRNA	26.8171536	87.65348116	-1.708655272	3.59E-11	down	ssc:102167982	uncharacterized LOC102167982
LOC100627979	5148	pseudo	0.128168014	11.59202281	-6.498952263	5.29E-07	down		phosphoglucomutase-1-like
LOC102164474	15185	ncRNA	0.324854915	28.36655164	-6.448251439	0	down	ssc:102164474	uncharacterized LOC102164474
LOC102157708	10323	ncRNA	5.225833669	125.8419898	-4.589808371	0	down	ssc:102157708	uncharacterized LOC102157708
LOC102157701	5943	ncRNA	2.555785509	46.37542982	-4.181521983	0	down	ssc:102157701	uncharacterized LOC102157701
LOC102157704	54032	ncRNA	0.196686901	32.4321256	-7.365378894	0	down	ssc:102157704	uncharacterized LOC102157704
LOC102157703	610	ncRNA	0.587070787	19.60868888	-5.061814795	4.40E-05	down	ssc:102157703	uncharacterized LOC102157703
LOC102166647	1634	ncRNA	0.205556659	13.85524124	-6.074751909	0.00171853	down	ssc:102166647	uncharacterized LOC102166647
LOC102163135	22267	ncRNA	0.128168014	39.59164539	-8.27101595	0	down	ssc:102163135	uncharacterized LOC102163135
LOC102165797	712	pseudo	0.059649128	16.28577932	-8.092896003	2.15E-10	down		60S ribosomal protein L21-like
LOC102164466	2390	ncRNA	0.384504042	34.61168421	-6.492116569	0	down	ssc:102164466	uncharacterized LOC102164466
LOC100514807	10873	ncRNA	3.941463572	75.40098605	-4.257780044	0	down	ssc:100514807	uncharacterized LOC100514807
LOC102165318	20656	ncRNA	255.5102787	119.9520446	1.090923581	5.01E-07	up	ssc:102165318	uncharacterized LOC102165318
LOC102166648	40937	ncRNA	0.059649128	23.67573056	-8.632692188	5.88E-15	down	ssc:102166648	uncharacterized LOC102166648
LOC100520275	12221	ncRNA	1.336293665	28.48543665	-4.413915526	1.12E-09	down	ssc:100520275	uncharacterized LOC100520275
LOC102162280	998	pseudo	0.24746627	208.1089524	-9.715891418	0	down		60S ribosomal protein L7-like
LOC100624459	570	pseudo	0.068518886	50.35294081	-9.521358619	0	down		interferon omega-1-like
LOC102167974	16969	ncRNA	7.658429518	84.07518899	-3.456559637	0	down	ssc:102167974	uncharacterized LOC102167974
LOC102162284	451	ncRNA	0.059649128	16.77452883	-8.135555488	1.91E-07	down	ssc:102162284	uncharacterized LOC102162284
LOC102165796	10919	ncRNA	1.465956637	1695.50726	-10.17565882	0	down	ssc:102165796	uncharacterized LOC102165796
LOC102163134	47282	ncRNA	0	22.15811197	-20	4.77E-15	down	ssc:102163134	uncharacterized LOC102163134
LOC102166640	14413	ncRNA	1.460527538	7.931538524	-2.44111118	0.019464079	down	ssc:102166640	uncharacterized LOC102166640
LOC100739108	59346	pseudo	16.33812629	1.890418508	3.111464975	0.021295085	up		uncharacterized LOC100739108
LOC100626635	3972	pseudo	0.137037773	36.01335321	-8.037814515	0	down		L-xylulose reductase-like
LOC100522455	92207	pseudo	0.850781616	46.08628972	-5.759404955	0	down	ssc:100522455	multidrug resistance protein 1-like
LOC102160099	1842	ncRNA	34.06891194	1.602746127	4.409838045	0.00579286	up	ssc:102160099	uncharacterized LOC102160099
LOC102162277	91766	ncRNA	4.178014394	321.9362172	-6.267813613	0	down	ssc:102162277	uncharacterized LOC102162277
LOC102164456	12316	ncRNA	0.864136248	294.4136024	-8.412369814	0	down	ssc:102164456	uncharacterized LOC102164456
LOC102165780	4114	ncRNA	0.178947383	19.89342582	-6.796612486	9.21E-10	down	ssc:102165780	uncharacterized LOC102165780
LOC100738229	78847	pseudo	78.69670886	25.45019948	1.628626338	1.61E-06	up		DENN domain-containing protein 1B-like
LOC100739558	356	pseudo	0.128168014	54.64160765	-8.735819855	0	down		nuclear transport factor 2-like
LOC102166630	10105	ncRNA	0.274075546	52.61322381	-7.584708031	0	down	ssc:102166630	uncharacterized LOC102166630
LOC102162276	19491	ncRNA	0.068518886	25.04364209	-8.513726967	2.95E-14	down	ssc:102162276	uncharacterized LOC102162276
LOC102165783	47612	ncRNA	1.398932708	140.7613253	-6.652780626	0	down	ssc:102165783	uncharacterized LOC102165783
LOC100738228	70465	pseudo	90.35133078	222.1858188	-1.298148983	1.97E-07	down		atherin-like
LOC100512652	18146	pseudo	49.0830703	151.273109	-1.623858148	3.45E-13	down	ssc:100512652	Uncharacterized protein
LOC100525935	1135	ncRNA	208.8908678	56.36910965	1.889772737	5.14E-04	up	ssc:100525935	uncharacterized LOC100525935
LOC102163598	18066	pseudo	0.521541815	24.79119489	-5.570901071	4.22E-11	down		5-hydroxytryptamine receptor 3C-like
LOC102162266	1000	ncRNA	1.977133736	747.283317	-8.562101044	0	down	ssc:102162266	uncharacterized LOC102162266
LOC102163113	42123	pseudo	0.461892688	179.2565867	-8.600252709	0	down		uncharacterized LOC102163113
CCNB1IP1	21544	ncRNA	124.4096942	27.54316283	2.175332765	0.023207815	up	ssc:100515615	Uncharacterized protein
LOC102164444	23352	ncRNA	17.48538685	2332.518121	-7.059594765	0	down	ssc:102164444	uncharacterized LOC102164444
LOC102166623	125780	ncRNA	0.537786375	847.4887074	-10.62194522	0	down	ssc:102166623	uncharacterized LOC102166623
LOC102164445	7042	ncRNA	0.451527971	51.67241771	-6.838435215	0	down	ssc:102164445	uncharacterized LOC102164445
LOC102159095	3414	ncRNA	0.137037773	419.7418915	-11.58071313	0	down	ssc:102159095	uncharacterized LOC102159095
LOC102159096	22894	ncRNA	0	517.4389549	-20	0	down	ssc:102159096	uncharacterized LOC102159096
LOC102167958	354	pseudo	0	27.71048248	-20	0	down		ribosomal protein L35a pseudogene
LOC102159093	1111	ncRNA	0.068518886	38.18704096	-9.122365712	0	down	ssc:102159093	uncharacterized LOC102159093
LOC102166626	1173	ncRNA	0.068518886	15.74419203	-7.844102302	3.36E-06	down	ssc:102166626	uncharacterized LOC102166626
LOC102164449	4155	ncRNA	0.068518886	57.42586534	-9.710983271	0	down	ssc:102164449	uncharacterized LOC102164449
LOC100739565	5780	ncRNA	15.83908785	838.6192982	-5.726454869	0	down	ssc:100739565	uncharacterized LOC100739565
LOC102159090	2074	ncRNA	0.128168014	66.75907287	-9.024783844	0	down	ssc:102159090	uncharacterized LOC102159090
LOC102163591	7438	ncRNA	2.305922792	1726.5612	-9.548341549	0	down	ssc:102163591	uncharacterized LOC102163591
LOC100737389	14850	ncRNA	39.18282215	6.412452223	2.611273235	0.022999597	up	ssc:100737389	uncharacterized LOC100737389
LOC102166621	5412	ncRNA	0.137037773	265.3396115	-10.91905074	0	down	ssc:102166621	uncharacterized LOC102166621
LOC102166620	73612	ncRNA	0.400748602	26.39394102	-6.041365484	2.27E-13	down	ssc:102166620	uncharacterized LOC102166620
LOC100524619	3103	ncRNA	79.80228236	23.76232582	1.747753957	0.023460474	up	ssc:100524619	uncharacterized LOC100524619
LOC100156563	56283	pseudo	0.205556659	493.5137125	-11.22933834	0	down		elongation factor 1-alpha 1-like
LOC102166217	17230	ncRNA	0.324854915	8.185453433	-4.6551949	0.001478207	down	ssc:102166217	uncharacterized LOC102166217
LOC102166218	985	ncRNA	0.187817142	20.26769346	-6.753709362	2.00E-09	down	ssc:102166218	uncharacterized LOC102166218
LOC102166216	702	ncRNA	0.274075546	31.86265171	-6.861148917	0	down	ssc:102166216	uncharacterized LOC102166216
LOC100737350	5807	ncRNA	0.859651375	22.2417718	-4.693376204	9.62E-06	down	ssc:100737350	uncharacterized LOC100737350
LOC100738204	5783	ncRNA	53.16024844	15.45798737	1.781995354	0.044928558	up	ssc:100738204	uncharacterized LOC100738204
LOC100738685	715	pseudo	0.271085631	45.14548362	-7.379689213	0	down		transmembrane protein 126B pseudogene
LOC100623579	329113	pseudo	79.07908013	11.2206906	2.817134617	1.80E-04	up		DENN domain-containing protein 5B-like
LOC102163189	2616	ncRNA	0.26371083	70.50615241	-8.062648525	0	down	ssc:102163189	uncharacterized LOC102163189
LOC102166211	370492	ncRNA	15.25308224	787.5985465	-5.690287741	0	down	ssc:102166211	uncharacterized LOC102166211
LOC100621396	1506	pseudo	0.606305262	132.2456358	-7.768960054	0	down		60S ribosomal protein L11-like
LOC102160909	5895	pseudo	2.685448481	31.0847621	-3.532972588	6.58E-09	down		calcium-independent phospholipase A2-gamma-like
LOC102163180	3866	ncRNA	0.332229716	14.31170099	-5.428870221	2.83E-08	down	ssc:102163180	uncharacterized LOC102163180
LOC100523335	797	pseudo	0.324854915	92.17845031	-8.148490171	0	down		transmembrane protein 106C pseudogene
LOC102157742	1862	ncRNA	0.137037773	84.3657968	-9.265940806	0	down	ssc:102157742	uncharacterized LOC102157742
LOC102157741	65453	ncRNA	0.393373801	162.1107257	-8.686862954	0	down	ssc:102157741	uncharacterized LOC102157741
LOC102159920	1975	ncRNA	0.128168014	76.0027497	-9.211871539	0	down	ssc:102159920	uncharacterized LOC102159920
LOC100525517	11940	ncRNA	19.04723686	535.1748378	-4.812356657	0	down	ssc:100525517	uncharacterized LOC100525517
LOC102167538	3606	ncRNA	2.63665755	303.0334998	-6.844623274	0	down	ssc:102167538	uncharacterized LOC102167538
LOC102164029	1143	pseudo	0.323359957	54.38916045	-7.39403431	0	down		NADH dehydrogenase [ubiquinone] flavoprotein 2, mitochondrial-like
LOC102164026	786	ncRNA	0.068518886	13.56756886	-7.62944481	9.97E-04	down	ssc:102164026	uncharacterized LOC102164026
LOC102165352	2910	ncRNA	203.9682896	43.00261792	2.245848481	0.003401521	up	ssc:102165352	uncharacterized LOC102165352
LOC102163173	6359	ncRNA	6.227994652	2279.900494	-8.515987439	0	down	ssc:102163173	uncharacterized LOC102163173
LOC100737369	1026	pseudo	0.187817142	298.2502126	-10.63297871	0	down		partitioning defective 6 homolog beta-like
LOC102165356	7381	ncRNA	0.205556659	57.3950433	-8.125246228	0	down	ssc:102165356	uncharacterized LOC102165356
LOC102165353	4343	ncRNA	0.068518886	160.5065118	-11.1938425	0	down	ssc:102165353	uncharacterized LOC102165353
LOC102164023	615	ncRNA	0.411113319	34.69534404	-6.399062151	0	down	ssc:102164023	uncharacterized LOC102164023
LOC102166201	3385	ncRNA	0.375634284	45.83531025	-6.930986887	0	down	ssc:102166201	uncharacterized LOC102166201
LOC100153481	1519	pseudo	0.256336028	17.4320657	-6.087563464	3.38E-05	down		immunoglobulin omega chain-like
LOC102157734	7492	pseudo	1.101137814	29.14590896	-4.726226447	8.72E-13	down		fibroin heavy chain-like
LOC102159912	2108	ncRNA	0.178947383	63.9777506	-8.481891013	0	down	ssc:102159912	uncharacterized LOC102159912
LOC102159910	28370	ncRNA	0.256336028	21.01035788	-6.356920661	1.02E-08	down	ssc:102159910	uncharacterized LOC102159910
LOC102165349	2105	ncRNA	0.067023929	20.52307609	-8.25835501	1.85E-12	down	ssc:102165349	uncharacterized LOC102165349
LOC100627918	8051	pseudo	0.579695986	18.2906797	-4.979668383	2.67E-07	down		serine/threonine-protein kinase 17A-like
LOC100154345	1444	pseudo	5.724800336	143.64392	-4.649127742	0	down		galactose mutarotase (aldose 1-epimerase) pseudogene
LOC102163163	8270	ncRNA	0.068518886	29.68456082	-8.758995348	0	down	ssc:102163163	uncharacterized LOC102163163
LOC100514876	29617	pseudo	0.324854915	35.55395803	-6.774070834	0	down		ribonucleoside-diphosphate reductase subunit M2-like
LOC102163162	12872	ncRNA	2.052927437	153.7550172	-6.226807042	0	down	ssc:102163162	uncharacterized LOC102163162
LOC102165345	14434	ncRNA	5.278952236	467.836017	-6.469607511	0	down	ssc:102165345	uncharacterized LOC102165345
LOC102163157	889	pseudo	0.068518886	84.24397635	-10.26385611	0	down		olfactory receptor 6C3-like
LOC102166667	2750	ncRNA	0.068518886	108.7768532	-10.63258227	0	down	ssc:102166667	uncharacterized LOC102166667
LOC102167998	4099	ncRNA	0.563451426	35.52313599	-5.978323896	0	down	ssc:102167998	uncharacterized LOC102167998
LOC102167513	9537	ncRNA	0.713743843	13.85377353	-4.278728788	1.86E-06	down	ssc:102167513	uncharacterized LOC102167513
LOC102165336	60314	ncRNA	1.613809871	28.11410445	-4.122751567	8.33E-15	down	ssc:102165336	uncharacterized LOC102165336
LOC100521145	551	pseudo	0.265205787	90.80466792	-8.419510396	0	down		calmodulin 1 (phosphorylase kinase, delta) pseudogene
LOC100739524	9624	ncRNA	31.31970844	95.01261036	-1.601048223	2.13E-11	down	ssc:100739524	uncharacterized LOC100739524
LOC102165333	2612	ncRNA	0.256336028	26.68014569	-6.701586469	1.02E-14	down	ssc:102165333	uncharacterized LOC102165333
LOC102164003	1119	pseudo	0.059649128	12.53869978	-7.715670998	9.33E-04	down		60S ribosomal protein L5-like
LOC102167511	1351	ncRNA	6.089025691	37.1244144	-2.608084964	1.63E-05	down	ssc:102167511	uncharacterized LOC102167511
LOC102163153	3335	ncRNA	4.213844187	128.5939578	-4.931542077	0	down	ssc:102163153	uncharacterized LOC102163153
LOC100739525	674	pseudo	0.128168014	22.36065681	-7.446782491	5.96E-14	down		40S ribosomal protein S15a-like
LOC102164485	2182	ncRNA	0.469267489	564.5306302	-10.23242563	0	down	ssc:102164485	uncharacterized LOC102164485
LOC100514862	1011	pseudo	0.059649128	9.617944476	-7.333083747	2.46E-07	down		olfactory receptor 147-like
LOC102163543	1833	pseudo	0.595940546	83.53066626	-7.130993729	0	down		tigger transposable element-derived protein 1-like
LOC102160033	5125	ncRNA	0.530411574	183.6421228	-8.435569042	0	down	ssc:102160033	uncharacterized LOC102160033
LOC102162211	3734	pseudo	0.128168014	57.22625593	-8.802497145	0	down		ubiquitin-40S ribosomal protein S27a-like
LOC102159045	3846	ncRNA	1.283075113	12.7397769	-3.311662479	3.49E-04	down	ssc:102159045	uncharacterized LOC102159045
LOC102162214	1812	ncRNA	4.069925094	296.4595988	-6.186689457	0	down	ssc:102162214	uncharacterized LOC102162214
LOC102158198	1856	ncRNA	0.467772531	12.82343673	-4.776832005	2.85E-05	down	ssc:102158198	uncharacterized LOC102158198
LOC102158192	783	ncRNA	1.294934786	218.2156464	-7.396731294	0	down	ssc:102158192	uncharacterized LOC102158192
LOC102161369	1799	ncRNA	0.47664229	172.2658543	-8.49751409	0	down	ssc:102161369	uncharacterized LOC102161369
LOC102158194	640	pseudo	0	29.68456082	-20	0	down		estrogen receptor binding site associated, antigen, 9 pseudogene
LOC102165724	1337	ncRNA	0.870016091	176.5691983	-7.664975893	0	down	ssc:102165724	uncharacterized LOC102165724
LOC100737312	1682	pseudo	0.067023929	16.48685645	-7.942424371	3.27E-13	down		KATNB1-like protein 1-like
LOC102164871	1398	pseudo	0	59.93859553	-20	0	down		splicing factor 3B subunit 4-like
LOC102164870	4291	ncRNA	0.987819389	392.0358122	-8.632522448	0	down	ssc:102164870	uncharacterized LOC102164870
LOC102162209	3947	ncRNA	34.76490175	825.704863	-4.569922785	0	down	ssc:102162209	uncharacterized LOC102162209
LOC102165719	8941	ncRNA	2.086067275	47.03149898	-4.494769724	0	down	ssc:102165719	uncharacterized LOC102165719
LOC102159033	1745	ncRNA	0.196686901	26.39247331	-7.068081868	2.89E-14	down	ssc:102159033	uncharacterized LOC102159033
LOC102164864	5232	ncRNA	0.196686901	19.89636126	-6.660459921	1.97E-09	down	ssc:102164864	uncharacterized LOC102164864
LOC102160023	4771	ncRNA	0.333724674	47.72719647	-7.160009429	0	down	ssc:102160023	uncharacterized LOC102160023
LOC102162684	34388	ncRNA	13.68003778	468.1530438	-5.096836118	0	down	ssc:102162684	uncharacterized LOC102162684
LOC102163533	2660	ncRNA	69.884968	250.24415	-1.840282268	1.17E-14	down	ssc:102163533	Uncharacterized protein
LOC102161356	4835	ncRNA	0.059649128	19.60868888	-8.360776318	6.26E-10	down	ssc:102161356	uncharacterized LOC102161356
LOC100738651	16751	pseudo	0.137037773	34.77753615	-7.987438306	0	down		tigger transposable element-derived protein 1-like
LOC102162207	1484	ncRNA	0.339604517	143.3900051	-8.721873101	0	down	ssc:102162207	uncharacterized LOC102162207
LOC102165713	1901	pseudo	0.525926702	103.6838779	-7.623114122	0	down		mitochondrial carrier 2 pseudogene
LOC102165714	3592	ncRNA	0.794122404	406.6322501	-9.000147528	0	down	ssc:102165714	uncharacterized LOC102165714
LOC100512228	3646	ncRNA	0.44415317	118.8541928	-8.063919795	0	down	ssc:100512228	uncharacterized LOC100512228
LOC100737323	3357	pseudo	0.333724674	40.90525142	-6.937483904	0	down		profilin-1-like
LOC100739506	602	pseudo	0.135542815	92.03754955	-9.407330119	0	down		AP-3 complex subunit sigma-1-like
LOC102161351	835	ncRNA	0.400748602	436.8569305	-10.09024767	0	down	ssc:102161351	uncharacterized LOC102161351
LOC102159038	6997	ncRNA	0.128168014	9.617944476	-6.229620427	1.11E-06	down	ssc:102159038	uncharacterized LOC102159038
LOC102165700	1971	ncRNA	0.137037773	14.71532295	-6.746601784	2.28E-05	down	ssc:102165700	uncharacterized LOC102165700
LOC102159020	1246	ncRNA	0.974464758	53.61273857	-5.78182201	0	down	ssc:102159020	uncharacterized LOC102159020
LOC102164851	2257	ncRNA	0.846296744	101.1344548	-6.900895251	0	down	ssc:102164851	uncharacterized LOC102164851
LOC102160013	34430	ncRNA	0	438.6901081	-20	0	down	ssc:102160013	uncharacterized LOC102160013
LOC102162675	1990	ncRNA	0.375634284	33.17772545	-6.464742431	0	down	ssc:102162675	uncharacterized LOC102162675
LOC102160014	5952	ncRNA	0.24746627	52.53543485	-7.729915136	0	down	ssc:102160014	uncharacterized LOC102160014
LOC102158170	486	pseudo	0.254841071	67.7028144	-8.053474193	0	down		transmembrane protein 14C pseudogene
LOC102165704	1411	ncRNA	0.119298255	15.1717827	-6.990673858	2.34E-05	down	ssc:102165704	uncharacterized LOC102165704
LOC102160015	2017	pseudo	0.332229716	151.8073577	-8.835844881	0	down		cyclin E1 pseudogene
LOC102160499	12418	ncRNA	0.877390893	96.44363368	-6.780322467	0	down	ssc:102160499	uncharacterized LOC102160499
LOC102165705	179487	ncRNA	1.824795629	674.9307775	-8.530860837	0	down	ssc:102165705	uncharacterized LOC102165705
LOC102165703	2416	ncRNA	0.40224356	430.5956531	-10.06404872	0	down	ssc:102165703	uncharacterized LOC102165703
LOC102162670	2589	ncRNA	0	22.61457172	-20	4.88E-15	down	ssc:102162670	uncharacterized LOC102162670
LOC102160491	7846	ncRNA	72.05177023	201.2077507	-1.481580099	1.09E-06	down	ssc:102160491	uncharacterized LOC102160491
LOC102160492	8095	ncRNA	0.128168014	23.18844877	-7.499226236	6.14E-14	down	ssc:102160492	uncharacterized LOC102160492
LOC102162672	6735	ncRNA	1.75179187	528.3161999	-8.236426459	0	down	ssc:102162672	uncharacterized LOC102162672
LOC102162671	6668	ncRNA	1.666084198	67.67199236	-5.344025648	0	down	ssc:102162671	uncharacterized LOC102162671
LOC100514431	152509	pseudo	21.90963784	65.15485902	-1.572307137	1.12E-06	down	ssc:100514431	cordon-bleu protein-like 1-like
LOC102161339	1518	pseudo	0.342594432	203.7087392	-9.215790453	0	down		apolipoprotein O pseudogene
LOC102159024	3062	ncRNA	0	31.77458873	-20	0	down	ssc:102159024	uncharacterized LOC102159024
LOC102160485	2448	ncRNA	0.187817142	266.2290475	-10.46912353	0	down	ssc:102160485	uncharacterized LOC102160485
LOC102159496	3310	ncRNA	0.24746627	83.7053245	-8.401943691	0	down	ssc:102159496	uncharacterized LOC102159496
LOC102160486	943	ncRNA	0.068518886	30.91450702	-8.817566579	0	down	ssc:102160486	uncharacterized LOC102160486
LOC102163998	1542	ncRNA	0.315985156	24.04706276	-6.24986009	1.23E-11	down	ssc:102163998	uncharacterized LOC102163998
LOC102159492	1085	ncRNA	0.196686901	29.1136192	-7.209649509	0	down	ssc:102159492	uncharacterized LOC102159492
LOC102163513	3237	ncRNA	0.274075546	18.58128751	-6.08313305	9.19E-09	down	ssc:102163513	uncharacterized LOC102163513
LOC102161336	3670	ncRNA	0.128168014	27.62388722	-7.751736274	0	down	ssc:102161336	uncharacterized LOC102161336
LOC102164847	4783	ncRNA	0	37.12734983	-20	0	down	ssc:102164847	uncharacterized LOC102164847
LOC102162669	1317	ncRNA	8.791956466	58.46060528	-2.733208619	1.26E-12	down	ssc:102162669	uncharacterized LOC102162669
LOC102161337	2176	ncRNA	0.679209034	133.5665804	-7.619487713	0	down	ssc:102161337	uncharacterized LOC102161337
SLA-DYB	1441	pseudo	1.029728999	12.53723206	-3.60588226	1.41E-04	down		MHC class II, DY/DQ beta-like pseudogene
LOC102162660	6761	ncRNA	0.520046858	8.185453433	-3.976348811	0.005787309	down	ssc:102162660	uncharacterized LOC102162660
LOC100516601	6627	ncRNA	38.42736222	116.1051603	-1.595226241	9.04E-09	down	ssc:100516601	uncharacterized LOC100516601
LOC102163508	1158	ncRNA	0.661469517	77.94747371	-6.880683782	0	down	ssc:102163508	uncharacterized LOC102163508
LOC102158166	1227	pseudo	0	61.7438865	-20	0	down		28S ribosomal protein S31, mitochondrial-like
LOC102159016	10827	ncRNA	0.128168014	27.7119502	-7.756328167	0	down	ssc:102159016	uncharacterized LOC102159016
LOC102158169	5214	ncRNA	2.109235891	1371.68356	-9.345011531	0	down	ssc:102158169	uncharacterized LOC102158169
LOC102159013	36236	ncRNA	0.57670607	16.77452883	-4.862292225	0.005791516	down	ssc:102159013	uncharacterized LOC102159013
LOC102159014	52035	ncRNA	0.543666219	78.97634279	-7.182555563	0	down	ssc:102159014	uncharacterized LOC102159014
LOC102163587	28746	pseudo	0.393373801	147.3410972	-8.549043299	0	down		tigger transposable element-derived protein 1-like
LOC102167944	82836	ncRNA	0.274075546	55.41802953	-7.659637994	0	down	ssc:102167944	uncharacterized LOC102167944
LOC102167943	27172	ncRNA	5.992796065	492.1384624	-6.359691183	0	down	ssc:102167943	uncharacterized LOC102167943
LOC102166611	4243	ncRNA	0.187817142	19.40761175	-6.691150043	3.24E-08	down	ssc:102166611	uncharacterized LOC102166611
LOC102165765	5566	ncRNA	1.218490367	431.6318607	-8.468562704	0	down	ssc:102165765	uncharacterized LOC102165765
LOC102163107	3438	ncRNA	7.366020987	23.27210859	-1.659644521	0.012626037	down	ssc:102163107	uncharacterized LOC102163107
LOC100525590	2285	ncRNA	1733.131889	88.09673146	4.298149142	0.045674132	up	ssc:100525590	uncharacterized LOC100525590
LOC102160073	15722	ncRNA	0.648214872	131.5572768	-7.665003215	0	down	ssc:102160073	uncharacterized LOC102160073
LOC102163582	462	ncRNA	0	41.39546864	-20	0	down	ssc:102163582	uncharacterized LOC102163582
LOC102162254	1982	ncRNA	3.921127634	463.2802259	-6.884472692	0	down	ssc:102162254	uncharacterized LOC102162254
LOC102164430	750	ncRNA	0	37.98743155	-20	0	down	ssc:102164430	uncharacterized LOC102164430
LOC100516635	4259	ncRNA	1.297824715	26.39247331	-4.345959105	1.19E-06	down	ssc:100516635	uncharacterized LOC100516635
LOC102166608	1982	ncRNA	0	31.77605645	-20	0	down	ssc:102166608	uncharacterized LOC102166608
LOC102159077	4081	ncRNA	0.469267489	103.5972826	-7.786359933	0	down	ssc:102159077	uncharacterized LOC102159077
LOC102161397	9550	ncRNA	0.789637531	128.7040365	-7.348651024	0	down	ssc:102161397	uncharacterized LOC102161397
LOC102164425	18175	ncRNA	1.325928949	673.7022991	-8.988963943	0	down	ssc:102164425	uncharacterized LOC102164425
LOC102166601	545	pseudo	0.059649128	14.71532295	-7.94660245	3.17E-06	down		isochorismatase domain containing 1 pseudogene
LOC102159076	4264	ncRNA	0.128168014	56.1929837	-8.77620993	0	down	ssc:102159076	uncharacterized LOC102159076
LOC102167937	3736	ncRNA	1.935774857	399.1923965	-7.688029264	0	down	ssc:102167937	uncharacterized LOC102167937
LOC102164426	8949	ncRNA	0.119298255	27.22173298	-7.834042159	0	down	ssc:102164426	uncharacterized LOC102164426
LOC102160063	697	pseudo	2.796270472	239.5650467	-6.420769706	0	down		uncharacterized LOC102160063
LOC102163571	2449	ncRNA	4.828919222	69.59323291	-3.849174793	0	down	ssc:102163571	uncharacterized LOC102163571
LOC100518805	450	pseudo	0	87.82080081	-20	0	down		ribosomal protein S20 pseudogene
LOC733587	994	pseudo	0.187817142	115.5283479	-9.26470244	0	down	ssc:733587	neuroblastoma RAS viral (v-ras) oncogene homolog pseudogene
LOC100515775	3111	pseudo	0.46039773	120.1677989	-8.027953916	0	down		G protein pathway suppressor 2-like
LOC102167923	6099	ncRNA	0.068518886	210.6392952	-11.58598527	0	down	ssc:102167923	uncharacterized LOC102167923
LOC102165745	2397	ncRNA	0.333724674	30.83084719	-6.529572369	0	down	ssc:102165745	uncharacterized LOC102165745
LOC102167922	7086	ncRNA	0.40224356	93.77239014	-7.864950072	0	down	ssc:102167922	uncharacterized LOC102167922
LOC100525574	933	pseudo	0.254841071	12.62529504	-5.630575488	1.13E-08	down		olfactory receptor 6C4-like
LOC102165743	1145	pseudo	0.375634284	52.9918946	-7.140299156	0	down		heterogeneous nuclear ribonucleoprotein A1 pseudogene
LOC102164896	1258	ncRNA	0.332229716	189.0447863	-9.152331226	0	down	ssc:102164896	uncharacterized LOC102164896
LOC102161389	4700	ncRNA	6.37580515	261.0098486	-5.355352894	0	down	ssc:102161389	uncharacterized LOC102161389
LOC102163569	5300	ncRNA	0.314490198	16.94478391	-5.751682375	2.43E-08	down	ssc:102163569	uncharacterized LOC102163569
LOC102165748	15953	ncRNA	0.40224356	78.77379795	-7.613502701	0	down	ssc:102165748	uncharacterized LOC102165748
LOC102165746	3681	ncRNA	0.128168014	18.37727496	-7.163742779	9.11E-08	down	ssc:102165746	uncharacterized LOC102165746
LOC100153897	1630	pseudo	0.119298255	47.31623593	-8.631618554	0	down		elongation factor 1-alpha 1-like
LOC102167924	7927	ncRNA	0	46.20370702	-20	0	down	ssc:102167924	uncharacterized LOC102167924
LOC102164891	8886	ncRNA	0.137037773	37.24476713	-8.086320321	0	down	ssc:102164891	uncharacterized LOC102164891
LOC102161385	5596	ncRNA	0.274075546	37.20954194	-7.08495521	0	down	ssc:102161385	uncharacterized LOC102161385
LOC102164409	708	ncRNA	1.075572751	477.8795992	-8.795398259	0	down	ssc:102164409	uncharacterized LOC102164409
LOC102167917	116830	ncRNA	0.24746627	74.99589637	-8.243435952	0	down	ssc:102167917	uncharacterized LOC102167917
LOC102165733	19121	pseudo	12.20679988	72.22925127	-2.56489818	6.84E-14	down	ssc:102165733	patched domain-containing protein 3-like
LOC102162222	2406	ncRNA	0.60919519	154.6679367	-7.988053883	0	down	ssc:102162222	uncharacterized LOC102162222
LOC102164403	2947	ncRNA	1.212610524	306.2433952	-7.980418671	0	down	ssc:102164403	uncharacterized LOC102164403
LOC102161376	7790	ncRNA	0.205556659	15.08665516	-6.197593062	1.16E-04	down	ssc:102161376	uncharacterized LOC102161376
LOC102161377	1929	ncRNA	2.848094053	487.6766051	-7.419784165	0	down	ssc:102161377	uncharacterized LOC102161377
LOC102164400	6133	pseudo	0.126673057	54.27321087	-8.742986757	0	down		speedy protein A-like
LOC102159050	8788	ncRNA	0.178947383	90.86190885	-8.987996358	0	down	ssc:102159050	uncharacterized LOC102159050
LOC102161371	41558	ncRNA	0.339604517	241.0856007	-9.471474122	0	down	ssc:102161371	uncharacterized LOC102161371
LOC102165730	2344	ncRNA	0.384504042	46.28736685	-6.911475918	0	down	ssc:102165730	uncharacterized LOC102165730
LOC102164880	10718	ncRNA	0.205556659	47.03149898	-7.837947393	0	down	ssc:102164880	uncharacterized LOC102164880
LOC102164881	2473	ncRNA	0.783757687	7.155116637	-3.190495691	0.029914653	down	ssc:102164881	uncharacterized LOC102164881
LOC100513133	3466	ncRNA	124.6388162	338.4362831	-1.44113081	0	down	ssc:100513133	uncharacterized LOC100513133
LOC102160552	3894	ncRNA	0.466277574	32.51872086	-6.123937656	0	down	ssc:102160552	uncharacterized LOC102160552
LOC102161883	9166	ncRNA	0.82073168	276.4149982	-8.395709541	0	down	ssc:102161883	uncharacterized LOC102161883
LOC102161400	2907	ncRNA	5.609886967	56.36764194	-3.328823608	0	down	ssc:102161400	uncharacterized LOC102161400
LOC100152500	985	pseudo	0.196686901	21.95850256	-6.802734988	0	down		serine dehydratase pseudogene
LOC102164911	9737	ncRNA	7.55687078	679.552616	-6.490652496	0	down	ssc:102164911	uncharacterized LOC102164911
LOC102167183	364	pseudo	0	13.11110911	-20	7.86E-05	down		cytochrome b-c1 complex subunit 7-like
LOC100627057	5669	pseudo	0.059649128	22.81418113	-8.579214117	0	down		calmodulin-like
LOC102160548	3305	ncRNA	0.256336028	27.4228101	-6.741196341	1.05E-14	down	ssc:102160548	uncharacterized LOC102160548
LOC102158239	2259	ncRNA	0.059649128	11.0210812	-7.529549007	0.014959286	down	ssc:102158239	uncharacterized LOC102158239
LOC102164904	2723	pseudo	0.195191943	78.60354287	-8.653557026	0	down		60S ribosomal protein L36-like
LOC102159550	4998	ncRNA	0	107.1755748	-20	0	down	ssc:102159550	uncharacterized LOC102159550
LOC100152999	1001	pseudo	0.393373801	144.1312018	-8.517266095	0	down		la-related protein 1B-like
LOC102161873	1440	ncRNA	0.339604517	42.99527934	-6.984178809	0	down	ssc:102161873	uncharacterized LOC102161873
LOC102160543	3171	pseudo	0.256336028	67.21112947	-8.034520073	0	down		eukaryotic peptide chain release factor subunit 1-like
LOC102160545	1715	ncRNA	0.204061702	210.9445802	-10.01364286	0	down	ssc:102160545	uncharacterized LOC102160545
LOC102167177	26981	ncRNA	2.028757345	147.5040137	-6.184014084	0	down	ssc:102167177	uncharacterized LOC102167177
LOC102168023	28589	pseudo	0.391878844	87.27921352	-7.799086603	0	down		uncharacterized LOC102168023
LOC100525040	3602	pseudo	1.480706239	166.1762996	-6.810285377	0	down		nuclear transport factor 2-like
LOC102167179	4988	ncRNA	2.370507537	611.7705449	-8.011650856	0	down	ssc:102167179	uncharacterized LOC102167179
LOC100515215	2528	pseudo	0.779272815	216.2371649	-8.116270298	0	down		disintegrin and metalloproteinase domain-containing protein 20-like
LOC102162714	15837	ncRNA	0.068518886	36.0118855	-9.037755717	0	down	ssc:102162714	uncharacterized LOC102162714
LOC102160538	2504	ncRNA	0.119298255	14.14144591	-6.889212882	3.76E-04	down	ssc:102160538	uncharacterized LOC102160538
LOC100524164	31401	ncRNA	0.196686901	44.97522853	-7.837085925	0	down	ssc:100524164	uncharacterized LOC100524164
LOC102160531	4700	ncRNA	0.195191943	26.0211411	-7.058646915	2.85E-14	down	ssc:102160531	uncharacterized LOC102160531
LOC102158692	134037	ncRNA	0.187817142	203.5942573	-10.08215241	0	down	ssc:102158692	uncharacterized LOC102158692
LOC102161866	3141	ncRNA	4.656602386	52.78788204	-3.502857178	9.99E-16	down	ssc:102161866	uncharacterized LOC102161866
LOC100620883	611	pseudo	0.059649128	16.94478391	-8.150124484	8.95E-11	down		60S acidic ribosomal protein P1-like
LOC102167169	5703	ncRNA	0.469267489	107.3722488	-7.837994937	0	down	ssc:102167169	uncharacterized LOC102167169
LOC100515242	6560	ncRNA	0.942919864	297.2873907	-8.300507393	0	down	ssc:100515242	uncharacterized LOC100515242
LOC102168010	1208	ncRNA	0.068518886	90.89419861	-10.3734708	0	down	ssc:102168010	uncharacterized LOC102168010
LOC102159547	2932	ncRNA	0.341099475	23.9325809	-6.132639642	0	down	ssc:102159547	uncharacterized LOC102159547
LOC102161858	1082	ncRNA	0.875895935	19.32101649	-4.463267713	9.24E-09	down	ssc:102161858	uncharacterized LOC102161858
LOC102158216	561	ncRNA	0.716733758	306.6132597	-8.740767066	0	down	ssc:102158216	uncharacterized LOC102158216
LOC102159546	1375	ncRNA	0	10.07587194	-20	0.024484713	down	ssc:102159546	uncharacterized LOC102159546
LOC102161859	12796	ncRNA	3.190195005	517.8337705	-7.34270063	0	down	ssc:102161859	uncharacterized LOC102161859
LOC102161850	6681	ncRNA	0.068518886	82.67939085	-10.23681034	0	down	ssc:102161850	uncharacterized LOC102161850
LOC102168008	1688	ncRNA	2.130866814	384.5078956	-7.49542899	0	down	ssc:102168008	uncharacterized LOC102168008
LOC102160522	7524	ncRNA	11.95265227	30.66352754	-1.35919289	0.005369255	down	ssc:102160522	uncharacterized LOC102160522
LOC102161855	9786	ncRNA	10.55781094	118.2260103	-3.485164829	0	down	ssc:102161855	uncharacterized LOC102161855
LOC102167156	3762	ncRNA	0.520046858	144.590597	-8.119116398	0	down	ssc:102167156	uncharacterized LOC102167156
LOC100736972	9290	ncRNA	6.807690638	1633.098498	-7.906230615	0	down	ssc:100736972	uncharacterized LOC100736972
LOC102167157	3454	ncRNA	0	26.76674094	-20	0	down	ssc:102167157	uncharacterized LOC102167157
LOC100626177	610	pseudo	0.196686901	32.89005307	-7.385606649	0	down		brain acid soluble protein 1-like
LOC102158209	1358	ncRNA	0.932555148	67.95966475	-6.187345882	0	down	ssc:102158209	uncharacterized LOC102158209
LOC102158687	6111	ncRNA	3.693446571	1069.53069	-8.177794458	0	down	ssc:102158687	uncharacterized LOC102158687
LOC102158203	8547	ncRNA	0.274075546	54.47428799	-7.634858014	0	down	ssc:102158203	uncharacterized LOC102158203
LOC102161847	11682	ncRNA	1.372323432	124.8953129	-6.507954987	0	down	ssc:102161847	uncharacterized LOC102161847
LOC102158684	1348	ncRNA	0.312995241	56.90482608	-7.506266481	0	down	ssc:102158684	uncharacterized LOC102158684
LOC102164953	2875	ncRNA	2.480836047	13.11110911	-2.401891434	0.007911282	down	ssc:102164953	uncharacterized LOC102164953
LOC102161442	3322	ncRNA	0.274075546	17.4320657	-5.991026118	3.38E-05	down	ssc:102161442	uncharacterized LOC102161442
LOC102160595	4717	ncRNA	0.068518886	26.96635035	-8.620442859	0	down	ssc:102160595	uncharacterized LOC102160595
LOC102162775	1734	ncRNA	0.196686901	26.27505601	-7.061649152	4.77E-15	down	ssc:102162775	uncharacterized LOC102162775
LOC102158274	706	pseudo	0.205556659	109.1878137	-9.053060022	0	down		uncharacterized LOC102158274
LOC100525078	1958	ncRNA	13.20358902	74.60695157	-2.498379923	0	down	ssc:100525078	uncharacterized LOC100525078
LOC102164951	2253	ncRNA	0	13.11257683	-20	3.94E-06	down	ssc:102164951	uncharacterized LOC102164951
LOC102160597	2258	ncRNA	0.126673057	25.732001	-7.666310144	3.36E-13	down	ssc:102160597	uncharacterized LOC102160597
LOC102160114	9946	ncRNA	0	12.90856427	-20	0.00154564	down	ssc:102160114	uncharacterized LOC102160114
LOC102160116	849	ncRNA	0.26371083	113.5865593	-8.750619597	0	down	ssc:102160116	uncharacterized LOC102160116
LOC102160593	13459	ncRNA	0.451527971	66.35251547	-7.199191987	0	down	ssc:102160593	uncharacterized LOC102160593
LOC102168072	49711	ncRNA	1.649839638	882.9061678	-9.063790508	0	down	ssc:102168072	uncharacterized LOC102168072
LOC100513086	956	pseudo	0.196686901	18.00594275	-6.51642845	5.06E-07	down		olfactory receptor 6C2-like
LOC100736946	18926	ncRNA	168.170481	76.50177322	1.136359398	0.032595824	up	ssc:100736946	uncharacterized LOC100736946
LOC102168074	12075	ncRNA	0.521541815	14.71385524	-4.818248565	2.71E-07	down	ssc:102168074	uncharacterized LOC102168074
LOC102160107	2213	ncRNA	3.426745826	440.6377675	-7.006610159	0	down	ssc:102160107	uncharacterized LOC102160107
LOC102163619	4939	ncRNA	0.059649128	42.39204796	-9.473076909	0	down	ssc:102163619	uncharacterized LOC102163619
LOC102159127	11841	ncRNA	0.24746627	168.2281669	-9.408971671	0	down	ssc:102159127	uncharacterized LOC102159127
LOC102159123	654	ncRNA	0.187817142	78.31440277	-8.703805105	0	down	ssc:102159123	uncharacterized LOC102159123
LOC102158261	2761	ncRNA	0.734473276	99.24550397	-7.078147938	0	down	ssc:102158261	uncharacterized LOC102158261
LOC102159595	26893	ncRNA	0.274075546	27.91302732	-6.67022118	0	down	ssc:102159595	uncharacterized LOC102159595
LOC102160584	30388	ncRNA	0.256336028	41.64938355	-7.344115067	0	down	ssc:102160584	uncharacterized LOC102160584
LOC102158264	2787	ncRNA	4.160768357	796.052592	-7.579869965	0	down	ssc:102158264	uncharacterized LOC102158264
LOC102160586	2046	pseudo	16.56913189	710.8604709	-5.42299649	0	down		collagen alpha-1(II) chain-like
LOC102164940	7820	ncRNA	0.187817142	19.40761175	-6.691150043	3.24E-08	down	ssc:102164940	uncharacterized LOC102164940
LOC102161434	10369	ncRNA	0.333724674	12.90856427	-5.273526384	8.85E-07	down	ssc:102161434	uncharacterized LOC102161434
LOC102160104	1819	ncRNA	1.909559076	406.4282376	-7.733617277	0	down	ssc:102160104	uncharacterized LOC102160104
LOC102161436	5936	ncRNA	0.059649128	43.25653282	-9.502201277	0	down	ssc:102161436	uncharacterized LOC102161436
LOC102164943	6719	ncRNA	1.151466438	439.1759222	-8.575182789	0	down	ssc:102164943	uncharacterized LOC102164943
LOC100626154	960	pseudo	0	19.03627954	-20	3.39E-11	down		nuclease-sensitive element-binding protein 1-like
LOC102161429	5188	ncRNA	0	19.23442124	-20	1.36E-08	down	ssc:102161429	uncharacterized LOC102161429
LOC100522818	3878	ncRNA	1.020859241	42.33921018	-5.374138495	0	down	ssc:100522818	uncharacterized LOC100522818
LOC102158268	996	ncRNA	0	120.0914776	-20	0	down	ssc:102158268	uncharacterized LOC102158268
LOC102159583	823	ncRNA	0	34.52362124	-20	0	down	ssc:102159583	uncharacterized LOC102159583
LOC102160572	2519	ncRNA	0.520046858	39.55788792	-6.249179969	0	down	ssc:102160572	uncharacterized LOC102160572
LOC102162751	23007	ncRNA	0.274075546	276.8831997	-9.980488193	0	down	ssc:102162751	uncharacterized LOC102162751
LOC102159584	2487	ncRNA	0	25.44873177	-20	0	down	ssc:102159584	uncharacterized LOC102159584
LOC100739194	1227	pseudo	0.186322184	30.25990558	-7.343464218	0	down		28S ribosomal protein S31, mitochondrial-like
LOC102159581	5796	ncRNA	0.068518886	38.47764877	-9.133303223	0	down	ssc:102159581	uncharacterized LOC102159581
LOC102159582	3899	ncRNA	0.333724674	36.09554532	-6.757018636	0	down	ssc:102159582	uncharacterized LOC102159582
LOC102164935	1130	ncRNA	0.399253645	136.201131	-8.41421739	0	down	ssc:102164935	uncharacterized LOC102164935
LOC102164932	3199	ncRNA	3.591887833	765.9556029	-7.736374663	0	down	ssc:102164932	uncharacterized LOC102164932
LOC102163604	3368	ncRNA	0.329239801	16.31806908	-5.631187793	1.12E-04	down	ssc:102163604	uncharacterized LOC102163604
LOC102160579	12352	ncRNA	0.24746627	47.15185171	-7.573938724	0	down	ssc:102160579	uncharacterized LOC102160579
LOC102160570	27189	ncRNA	0.834537056	33.75013478	-5.337773342	1.89E-15	down	ssc:102160570	uncharacterized LOC102160570
LOC102160569	16810	ncRNA	0.068518886	12.16736757	-7.472299652	9.10E-04	down	ssc:102160569	uncharacterized LOC102160569
LOC102158259	24539	ncRNA	0.137037773	21.66936247	-7.304939288	1.88E-11	down	ssc:102158259	uncharacterized LOC102158259
LOC100625296	4185	pseudo	5.387635002	244.5215244	-5.504165541	0	down	ssc:100625296	neurofilament heavy polypeptide-like
LOC102159106	1144	pseudo	0.187817142	29.22810107	-7.281883549	0	down		AP-3 complex subunit sigma-1-like
LOC102159104	10493	ncRNA	0.948899694	1501.643962	-10.62799958	0	down	ssc:102159104	uncharacterized LOC102159104
LOC100518790	724	pseudo	0.187817142	27.05147789	-7.170234862	1.67E-15	down		proline-rich protein 3-like
LOC102159586	1250	ncRNA	1.868200197	191.5017432	-6.679564652	0	down	ssc:102159586	uncharacterized LOC102159586
LOC102158240	1625	ncRNA	1.282624368	207.6745084	-7.339081608	0	down	ssc:102158240	uncharacterized LOC102158240
LOC102162744	11880	ncRNA	1.943049672	27.33768256	-3.814496262	3.20E-05	down	ssc:102162744	uncharacterized LOC102162744
LOC102161412	12088	ncRNA	0	22.44431664	-20	5.00E-15	down	ssc:102161412	uncharacterized LOC102161412
LOC102161413	10555	ncRNA	4.593512599	272.4345518	-5.89016809	0	down	ssc:102161413	uncharacterized LOC102161413
LOC102167199	51033	ncRNA	1.333403737	195.5394306	-7.196202072	0	down	ssc:102167199	uncharacterized LOC102167199
LOC102160560	12121	ncRNA	2.175215608	59.40287911	-4.771302543	0	down	ssc:102160560	uncharacterized LOC102160560
LOC100736939	32907	pseudo	6.150705993	843.104639	-7.098815871	0	down		protein MROH8-like
LOC102161407	7054	ncRNA	0.26371083	13.028917	-5.62661654	6.52E-09	down	ssc:102161407	uncharacterized LOC102161407
LOC102162738	7275	ncRNA	0.674824148	268.7417777	-8.637493299	0	down	ssc:102162738	uncharacterized LOC102162738
LOC102159577	1356	pseudo	0.205556659	66.84273269	-8.345090794	0	down		protein SDA1 homolog
LOC102160952	10465	ncRNA	0.26371083	30.3435654	-6.846289986	0	down	ssc:102160952	uncharacterized LOC102160952
LOC102161800	1284	ncRNA	0.068518886	15.83078729	-7.852015584	1.82E-07	down	ssc:102161800	uncharacterized LOC102161800
LOC102166253	4311	pseudo	0.068518886	78.97927822	-10.17075676	0	down		40S ribosomal protein S8-like
LOC100620820	19338	ncRNA	0.706369042	17.71973808	-4.648791354	0.00253209	down	ssc:100620820	uncharacterized LOC100620820
LOC102164073	10468	ncRNA	2.257639857	19.43843379	-3.106024714	5.43E-04	down	ssc:102164073	uncharacterized LOC102164073
LOC102166252	3599	ncRNA	85.22480777	21.70311994	1.973370988	0.002907609	up	ssc:102166252	uncharacterized LOC102166252
LOC102166257	5030	ncRNA	0.738858162	46.08482201	-5.96285043	0	down	ssc:102166257	uncharacterized LOC102166257
LOC102167586	25129	ncRNA	0.30562044	66.84273269	-7.772885872	0	down	ssc:102167586	uncharacterized LOC102167586
LOC100522844	4222	pseudo	1.61923897	1209.495045	-9.544873228	0	down		suppressor of cytokine signaling 6-like
LOC100623096	5638	ncRNA	33.66471381	9518.034097	-8.143282612	0	down	ssc:100623096	uncharacterized LOC100623096
LOC102157784	6398	pseudo	5.308794136	326.7840839	-5.94380971	0	down		putative NPIP-like protein LOC613037-like
LOC102159960	2368	ncRNA	1.481256971	28.19923199	-4.250762023	8.29E-09	down	ssc:102159960	uncharacterized LOC102159960
LOC102157783	3862	ncRNA	0.187817142	41.68020559	-7.793889842	0	down	ssc:102157783	uncharacterized LOC102157783
LOC102166248	40752	ncRNA	0.068518886	223.8237901	-11.67357406	0	down	ssc:102166248	uncharacterized LOC102166248
LOC102160942	6933	ncRNA	0.187817142	19.32248421	-6.684808035	3.23E-08	down	ssc:102160942	uncharacterized LOC102160942
LOC102165395	6025	ncRNA	0.658579588	96.32474867	-7.192404908	0	down	ssc:102165395	uncharacterized LOC102165395
LOC102164066	16431	ncRNA	0.590060702	302.8647124	-9.003594403	0	down	ssc:102164066	uncharacterized LOC102164066
LOC102164067	600	ncRNA	0.196686901	68.90193857	-8.452499887	0	down	ssc:102164067	uncharacterized LOC102164067
LOC102167575	35269	ncRNA	3.307547557	230.8086517	-6.124791593	0	down	ssc:102167575	uncharacterized LOC102167575
LOC100736911	547	pseudo	0.597435503	167.9771875	-8.135266629	0	down		60S ribosomal protein L12-like
LOC102158629	1180	ncRNA	1.152961396	191.9919605	-7.379557881	0	down	ssc:102158629	uncharacterized LOC102158629
LOC100516145	14346	ncRNA	7.460147673	66.72825083	-3.161021592	0	down	ssc:100516145	uncharacterized LOC100516145
LOC102164061	16772	ncRNA	0.137037773	39.29956986	-8.163796101	0	down	ssc:102164061	uncharacterized LOC102164061
LOC100517479	1094	pseudo	2.474956204	64.00857265	-4.692790237	0	down		ribosomal protein L27a pseudogene
LOC102160934	12797	ncRNA	0.187817142	40.82159159	-7.763859881	0	down	ssc:102160934	uncharacterized LOC102160934
LOC102160937	8184	ncRNA	0.068518886	82.29925234	-10.2301619	0	down	ssc:102160937	uncharacterized LOC102160937
LOC102160931	14161	ncRNA	0.674824148	56.33241675	-6.383309956	0	down	ssc:102160931	uncharacterized LOC102160931
LOC102166231	22065	ncRNA	0.783757687	37.90083629	-5.595678183	0	down	ssc:102166231	uncharacterized LOC102166231
LOC102167562	1972	ncRNA	0.307115397	36.30249331	-6.885143984	0	down	ssc:102167562	uncharacterized LOC102167562
LOC102165383	1240	ncRNA	0	13.85377353	-20	8.23E-05	down	ssc:102165383	uncharacterized LOC102165383
LOC102164050	2908	pseudo	0.068518886	35.89593592	-9.033103093	0	down		transmembrane protein 208-like
LOC100519203	5726	ncRNA	0.696004326	45.22914344	-6.022012591	0	down	ssc:100519203	uncharacterized LOC100519203
LOC102158616	3870	ncRNA	0.457407815	75.48611359	-7.366586445	0	down	ssc:102158616	uncharacterized LOC102158616
LOC102157765	2903	ncRNA	0.637850156	52.41214669	-6.360539845	0	down	ssc:102157765	uncharacterized LOC102157765
LOC102160927	1086	ncRNA	0.187817142	29.14297353	-7.277675534	0	down	ssc:102160927	uncharacterized LOC102160927
LOC102166226	6764	ncRNA	0	14.05631837	-20	4.18E-06	down	ssc:102166226	uncharacterized LOC102166226
LOC102167552	552	ncRNA	0.195191943	39.01630063	-7.643039679	0	down	ssc:102167552	uncharacterized LOC102167552
LOC102163194	1025	ncRNA	0.26371083	27.33768256	-6.695790321	1.04E-14	down	ssc:102163194	uncharacterized LOC102163194
LOC102164041	30302	ncRNA	3.673761351	565.6989323	-7.266632726	0	down	ssc:102164041	uncharacterized LOC102164041
LOC102167554	42029	ncRNA	0.128168014	23.84451792	-7.53947754	1.13E-12	down	ssc:102167554	uncharacterized LOC102167554
LOC100518349	52176	ncRNA	0.5185519	76.37701734	-7.20250638	0	down	ssc:100518349	uncharacterized LOC100518349
LOC100517497	1379	pseudo	0.196686901	24.41692726	-6.955836969	3.33E-16	down		MOB kinase activator 1B pseudogene
LOC102157756	3480	ncRNA	1.555204956	179.0525742	-6.847134728	0	down	ssc:102157756	uncharacterized LOC102157756
LOC102157755	384	pseudo	0	90.45388374	-20	0	down		40S ribosomal protein S15a-like
LOC102158601	2417	ncRNA	0.30562044	137.1536788	-8.809836571	0	down	ssc:102158601	uncharacterized LOC102158601
LOC100739170	9704	ncRNA	21.5087957	132.8253837	-2.626532226	0	down	ssc:100739170	uncharacterized LOC100739170
LOC102160916	68571	ncRNA	0.196686901	11.30875358	-5.845395241	7.60E-09	down	ssc:102160916	uncharacterized LOC102160916
LOC102157750	42379	ncRNA	4.395881472	112.7015264	-4.680210758	0	down	ssc:102157750	uncharacterized LOC102157750
LOC102158670	3152	ncRNA	0.458902773	202.095719	-8.782634523	0	down	ssc:102158670	uncharacterized LOC102158670
LOC102166298	3120	ncRNA	0.137037773	24.50352251	-7.482271739	6.43E-14	down	ssc:102166298	uncharacterized LOC102166298
LOC100155135	1054	pseudo	0.187817142	13.48244132	-6.165609202	0.025605114	down		beta-1,4-galactosyltransferase 4-like
LOC102167146	933	pseudo	0.393373801	29.22810107	-6.215311414	9.99E-16	down		nuclease-sensitive element-binding protein 1-like
LOC100625234	6316	ncRNA	4.407290401	935.0306421	-7.728977874	0	down	ssc:100625234	uncharacterized LOC100625234
LOC102158677	589	ncRNA	0.274075546	26.68014569	-6.605049124	1.03E-14	down	ssc:102158677	uncharacterized LOC102158677
LOC102160987	906	ncRNA	0.938534978	470.5527598	-8.969730263	0	down	ssc:102160987	uncharacterized LOC102160987
LOC102160503	2188	ncRNA	0.971574829	124.6076405	-7.002851702	0	down	ssc:102160503	uncharacterized LOC102160503
LOC102160504	2132	ncRNA	0.196686901	54.39209589	-8.111352331	0	down	ssc:102160504	uncharacterized LOC102160504
LOC100627892	3317	ncRNA	183.5168425	84.23076691	1.123493268	7.74E-06	up	ssc:100627892	uncharacterized LOC100627892
LOC102158678	1131	ncRNA	0.137037773	41.85192839	-8.254576678	0	down	ssc:102158678	uncharacterized LOC102158678
LOC102159524	14737	ncRNA	0.515561985	36.55347279	-6.147718776	0	down	ssc:102159524	uncharacterized LOC102159524
LOC102161838	719	pseudo	0.478137248	175.996789	-8.523908594	0	down		peroxiredoxin-2-like
LOC102159521	2100	pseudo	0.068518886	89.85652323	-10.35690582	0	down		mitochondrial import inner membrane translocase subunit Tim23-like
LOC100516198	6460	pseudo	0.716733758	38.35729604	-5.741919905	0	down	ssc:100516198	Uncharacterized protein
LOC102160507	25237	ncRNA	0.870016091	575.993494	-9.370794716	0	down	ssc:102160507	uncharacterized LOC102160507
LOC102161839	16686	ncRNA	0.925180346	21.9526317	-4.568515472	1.26E-06	down	ssc:102161839	uncharacterized LOC102161839
LOC102158674	553	pseudo	0.059649128	61.08781734	-10.00016794	0	down		ribosomal protein L17 pseudogene
LOC102158660	7565	ncRNA	0.196686901	13.6526964	-6.117141224	1.43E-08	down	ssc:102158660	uncharacterized LOC102158660
LOC102167139	1933	ncRNA	4.394286528	28.94336412	-2.719531769	0.045450752	down	ssc:102167139	uncharacterized LOC102167139
LOC100739145	19200	pseudo	1.199255892	257.7603249	-7.747746879	0	down		cytochrome c oxidase subunit 6B1-like
LOC102160501	3565	ncRNA	0.727098475	197.5707499	-8.086002889	0	down	ssc:102160501	uncharacterized LOC102160501
LOC102167133	462	ncRNA	0.068518886	36.83967745	-9.070543009	0	down	ssc:102167133	uncharacterized LOC102167133
LOC102167138	6104	ncRNA	1.458481849	158.1067958	-6.760288137	0	down	ssc:102167138	uncharacterized LOC102167138
LOC102166288	14051	ncRNA	0	131.5939698	-20	0	down	ssc:102166288	uncharacterized LOC102166288
LOC100513913	1834	pseudo	0.548151092	223.8267256	-8.673592983	0	down		DNA-(apurinic or apyrimidinic site) lyase-like
LOC100522416	41734	pseudo	0.40224356	24.21585013	-5.911738518	1.11E-16	down	ssc:100522416	retinal guanylyl cyclase 2-like
LOC102166282	11175	ncRNA	7.605704446	1013.387609	-7.0578885	0	down	ssc:102166282	uncharacterized LOC102166282
LOC102158669	6576	pseudo	8.960145638	26.27652372	-1.552180338	0.030043113	down	ssc:102158669	ataxin-1-like
LOC102160976	2848	ncRNA	1.559589842	694.091813	-8.797816038	0	down	ssc:102160976	uncharacterized LOC102160976
LOC102161823	13181	ncRNA	212.4826121	25.73787187	3.045380113	0.001688122	up	ssc:102161823	uncharacterized LOC102161823
LOC102158668	3621	pseudo	0.265205787	52.50020966	-7.629067117	0	down		uncharacterized LOC102158668
LOC102159993	470	pseudo	0.314490198	15.08518744	-5.583973759	7.63E-09	down		uncharacterized LOC102159993
LOC102160970	513	pseudo	7.285685163	24.70459964	-1.761643117	0.003374583	down		basic proline-rich protein-like
LOC100739595	4156	pseudo	0.590060702	162.7932137	-8.107961467	0	down		E3 ubiquitin-protein ligase MARCH6-like
LOC102164098	4324	ncRNA	0.205556659	89.54096424	-8.766867933	0	down	ssc:102164098	uncharacterized LOC102164098
LOC102167120	2979	ncRNA	0.451527971	28.85823658	-5.998023971	2.22E-16	down	ssc:102167120	uncharacterized LOC102167120
LOC102167126	538	ncRNA	2.139285828	1110.317056	-9.019626736	0	down	ssc:102167126	uncharacterized LOC102167126
LOC100625214	2510	ncRNA	42.22580819	125.6761379	-1.57351381	3.53E-09	down	ssc:100625214	uncharacterized LOC100625214
LOC102164090	7508	ncRNA	0.059649128	13.39878149	-7.81138505	5.40E-05	down	ssc:102164090	uncharacterized LOC102164090
LOC100520689	613	pseudo	0.119298255	15.08665516	-6.982556228	2.32E-05	down		ferritin, light polypeptide pseudogene
LOC102158659	6406	ncRNA	16.054573	44.86074667	-1.482469339	5.20E-04	down	ssc:102158659	Uncharacterized protein
LOC102158658	1935	ncRNA	0.068518886	13.19770437	-7.589569586	5.34E-05	down	ssc:102158658	uncharacterized LOC102158658
LOC102164091	37605	pseudo	0.253346113	34.78193929	-7.101084868	0	down		uncharacterized LOC102164091
LOC102159983	13320	ncRNA	0	31.77752416	-20	0	down	ssc:102159983	uncharacterized LOC102159983
LOC100517066	300	pseudo	0.274075546	16.89488156	-5.945868816	1.25E-10	down		high mobility group nucleosome binding domain 1 pseudogene
LOC102159981	35138	pseudo	0.128168014	45.91603464	-8.484817979	0	down		uncharacterized LOC102159981
LOC102167117	47841	ncRNA	2.919009387	100.5297557	-5.105999925	0	down	ssc:102167117	uncharacterized LOC102167117
LOC102161810	9269	ncRNA	0.272580588	114.7328457	-8.717379924	0	down	ssc:102161810	uncharacterized LOC102161810
LOC102164084	31836	ncRNA	0.470762446	12.82343673	-4.767639913	3.41E-05	down	ssc:102164084	uncharacterized LOC102164084
LOC102166267	7266	ncRNA	1.040093716	193.882379	-7.542324354	0	down	ssc:102166267	uncharacterized LOC102166267
LOC102161801	8430	ncRNA	0.196686901	17.92228292	-6.509709731	3.04E-08	down	ssc:102161801	uncharacterized LOC102161801
LOC102161802	1525	ncRNA	25.52146811	5.467242969	2.222825925	0.003203383	up	ssc:102161802	uncharacterized LOC102161802
LOC102161805	4920	ncRNA	3.590042117	1319.689712	-8.521982276	0	down	ssc:102161805	uncharacterized LOC102161805
LOC102159973	82238	ncRNA	18.03225747	1336.060619	-6.211261637	0	down	ssc:102159973	uncharacterized LOC102159973
LOC102161808	1322	ncRNA	0.874400978	203.8760588	-7.86518164	0	down	ssc:102161808	uncharacterized LOC102161808
LOC102165689	2565	pseudo	8.01213937	202.5947425	-4.660265409	0	down		uncharacterized LOC102165689
LOC102164358	8297	ncRNA	0.068518886	12.16736757	-7.472299652	9.10E-04	down	ssc:102164358	uncharacterized LOC102164358
LOC102166536	29143	ncRNA	0.581190943	113.9637624	-7.61534722	0	down	ssc:102166536	uncharacterized LOC102166536
LOC102164356	3158	ncRNA	5.150984194	22.69823155	-2.139659881	0.001960362	down	ssc:102164356	uncharacterized LOC102164356
LOC102167866	8874	ncRNA	0	20.7226855	-20	3.64E-11	down	ssc:102167866	uncharacterized LOC102167866
LOC102165204	1395	ncRNA	0.409618361	187.5022165	-8.838411549	0	down	ssc:102165204	uncharacterized LOC102165204
LOC100737273	455	pseudo	0	28.16547451	-20	0	down		nuclear transport factor 2-like
LOC102166538	8110	ncRNA	0.068518886	39.47422809	-9.170193634	0	down	ssc:102166538	uncharacterized LOC102166538
LOC102165681	12161	ncRNA	0.128168014	38.35876375	-8.22537615	0	down	ssc:102165681	uncharacterized LOC102165681
LOC102167860	12599	ncRNA	0.205556659	103.2597079	-8.972525595	0	down	ssc:102167860	uncharacterized LOC102167860
LOC100512753	63113	pseudo	1.232295744	247.2412026	-7.648426842	0	down	ssc:100512753	meiosis-specific nuclear structural protein 1-like
LOC100514938	1359	pseudo	0.195191943	57.76637551	-8.209192663	0	down		chromosome 5 open reading frame 44 ortholog pseudogene
LOC102166531	3085	ncRNA	37.29392075	233.512185	-2.646485452	0	down	ssc:102166531	uncharacterized LOC102166531
LOC100520389	6656	pseudo	70.37949978	17.55241843	2.003485437	0.026684467	up	ssc:100520389	zinc finger protein with KRAB and SCAN domains 8-like
LOC102158911	4369	ncRNA	0.068518886	15.08812288	-7.78269591	1.75E-07	down	ssc:102158911	uncharacterized LOC102158911
LOC102164347	12437	ncRNA	0.193696986	47.11662652	-7.926290936	0	down	ssc:102164347	uncharacterized LOC102164347
LOC100738130	22573	pseudo	35.40823181	189.6215987	-2.420966597	0	down	ssc:100738130	signal peptide, CUB and EGF-like domain-containing protein 3-like
LOC102164349	1001	pseudo	0.068518886	73.34178017	-10.06391786	0	down		GTP-binding protein 10-like
LOC102167859	7757	ncRNA	3.081812197	78.60354287	-4.672743487	0	down	ssc:102167859	uncharacterized LOC102167859
LOC102166527	19840	ncRNA	0.384504042	63.06629882	-7.357726692	0	down	ssc:102166527	uncharacterized LOC102166527
LOC100511896	114312	pseudo	141.0239764	307.5951619	-1.125092347	0	down	ssc:100511896	KDEL motif-containing protein 1-like
LOC102164340	12020	ncRNA	0	93.40399336	-20	0	down	ssc:102164340	uncharacterized LOC102164340
LOC102165671	72238	ncRNA	4.149952896	800.1475203	-7.591027237	0	down	ssc:102165671	uncharacterized LOC102165671
LOC102162161	39010	ncRNA	0.314490198	221.9627259	-9.463086657	0	down	ssc:102162161	uncharacterized LOC102162161
LOC102165675	2867	ncRNA	0.53479646	158.8641374	-8.21458785	0	down	ssc:102165675	uncharacterized LOC102165675
LOC102167852	3312	pseudo	0.135542815	72.84862752	-9.070009338	0	down		uncharacterized LOC102167852
LOC102164344	5739	ncRNA	1.209620609	191.740981	-7.308460284	0	down	ssc:102164344	uncharacterized LOC102164344
LOC102162166	2983	ncRNA	0.384504042	29.88710566	-6.280380613	1.11E-16	down	ssc:102162166	uncharacterized LOC102162166
LOC102165672	70810	ncRNA	0.72410856	796.6925163	-10.1036013	0	down	ssc:102165672	uncharacterized LOC102165672
LOC102162165	7879	ncRNA	0.33810956	48.75019469	-7.171773363	0	down	ssc:102162165	uncharacterized LOC102162165
LOC102163496	15648	ncRNA	0.068518886	63.06483111	-9.846118272	0	down	ssc:102163496	uncharacterized LOC102163496
LOC102163004	23628	ncRNA	4.554042172	2300.928465	-8.980852764	0	down	ssc:102163004	uncharacterized LOC102163004
LOC102166998	8548	ncRNA	0.068518886	23.55684554	-8.425428942	0	down	ssc:102166998	uncharacterized LOC102166998
LOC102163487	22708	ncRNA	0.384504042	37.24476713	-6.597895166	0	down	ssc:102163487	uncharacterized LOC102163487
LOC102163006	11890	ncRNA	0.324854915	18.09107029	-5.79933842	8.34E-06	down	ssc:102163006	uncharacterized LOC102163006
LOC102167843	5421	pseudo	0.307115397	108.643291	-8.466602528	0	down		40S ribosomal protein SA-like
LOC102167848	1797	ncRNA	0.068518886	22.90077639	-8.384679089	1.07E-13	down	ssc:102167848	uncharacterized LOC102167848
LOC102166517	8882	ncRNA	3.093121139	993.4149261	-8.327189277	0	down	ssc:102166517	uncharacterized LOC102166517
LOC102163480	2119	ncRNA	5.763069313	19.40614404	-1.751604209	0.042249714	down	ssc:102163480	uncharacterized LOC102163480
LOC102166991	10029	ncRNA	0.195191943	20.35135329	-6.704087417	3.66E-15	down	ssc:102166991	uncharacterized LOC102166991
LOC102166990	6538	ncRNA	14.71808581	232.7651174	-3.983212913	0	down	ssc:102166990	uncharacterized LOC102166990
LOC100739433	24398	pseudo	0.205556659	58.62645722	-8.155871956	0	down		uncharacterized LOC100739433
LOC102165663	1082	ncRNA	0.135542815	37.69829145	-8.119606686	0	down	ssc:102165663	uncharacterized LOC102165663
LOC102163000	4143	ncRNA	0.068518886	15.82931957	-7.851881822	3.37E-06	down	ssc:102163000	uncharacterized LOC102163000
LOC102163483	5474	ncRNA	0.068518886	64.66610952	-9.882292396	0	down	ssc:102163483	uncharacterized LOC102163483
LOC100738109	16736	ncRNA	0.274075546	25.1625271	-6.5205594	1.64E-13	down	ssc:100738109	uncharacterized LOC100738109
LOC102165662	28213	ncRNA	0.059649128	24.04559505	-8.655055873	0	down	ssc:102165662	uncharacterized LOC102165662
LOC100625891	17367	pseudo	0.384504042	11.3924134	-4.888930828	3.58E-06	down		arachidonate 12-lipoxygenase, epidermal-type-like
LOC102166985	813	ncRNA	0.272580588	122.8860093	-8.816422133	0	down	ssc:102166985	uncharacterized LOC102166985
LOC102162147	3108	ncRNA	0.537786375	69.8177935	-7.020417747	0	down	ssc:102162147	uncharacterized LOC102162147
LOC102163478	13445	ncRNA	37.10386439	143.9726885	-1.956153802	0	down	ssc:102163478	uncharacterized LOC102163478
LOC102167839	1327	ncRNA	12.02834598	59.11520672	-2.297091024	1.26E-06	down	ssc:102167839	uncharacterized LOC102167839
LOC102167838	2988	ncRNA	0	84.81345025	-20	0	down	ssc:102167838	uncharacterized LOC102167838
LOC102164327	1041	ncRNA	0.323359957	233.8130668	-9.497998807	0	down	ssc:102164327	uncharacterized LOC102164327
LOC102166506	2762	ncRNA	0	22.90077639	-20	4.88E-15	down	ssc:102166506	uncharacterized LOC102166506
LOC100513614	391	pseudo	0.068518886	16.0303967	-7.870092707	5.16E-13	down		mitochondrial pyruvate carrier 2 pseudogene
LOC102167831	1018	ncRNA	30.01711341	3.20695997	3.226506996	0.019701691	up	ssc:102167831	Uncharacterized protein
LOC102164322	8037	ncRNA	0.597435503	289.0461641	-8.918301238	0	down	ssc:102164322	uncharacterized LOC102164322
LOC102165650	2461	ncRNA	0.119298255	14.6830332	-6.943433273	2.90E-08	down	ssc:102165650	uncharacterized LOC102165650
LOC102162144	11168	ncRNA	0.916310588	1097.572876	-10.22619242	0	down	ssc:102162144	uncharacterized LOC102162144
LOC100156682	2489	pseudo	3.500100344	27.62241951	-2.980371506	5.28E-05	down	ssc:100156682	transmembrane protein 106B pseudogene
LOC102166981	4410	ncRNA	0.068518886	104.5043312	-10.57477341	0	down	ssc:102166981	uncharacterized LOC102166981
LOC100624550	1126	pseudo	0.339604517	109.4373255	-8.332033514	0	down		ribosomal protein L5 pseudogene
LOC102167829	22068	ncRNA	0.128168014	144.5392269	-10.1392091	0	down	ssc:102167829	uncharacterized LOC102167829
LOC102165247	1047	ncRNA	6.539352213	98.21663489	-3.908747759	0	down	ssc:102165247	uncharacterized LOC102165247
LOC102167426	5484	ncRNA	0	18.951152	-20	3.38E-11	down	ssc:102167426	uncharacterized LOC102167426
LOC102165241	11576	ncRNA	4.012772401	40.53391921	-3.33645844	3.72E-08	down	ssc:102165241	uncharacterized LOC102165241
LOC102166572	895	pseudo	1.278139495	273.5485484	-7.74160779	0	down		ribosomal protein S2e pseudogene
LOC102164395	3004	ncRNA	0.068518886	33.83673004	-8.947872733	0	down	ssc:102164395	uncharacterized LOC102164395
LOC102166571	37864	ncRNA	0.274075546	57.01637251	-7.700658834	0	down	ssc:102166571	uncharacterized LOC102166571
LOC100153112	848	pseudo	0.059649128	19.31954878	-8.339344644	8.23E-10	down		olfactory receptor 6C2-like
LOC102166577	1784	ncRNA	0.400748602	48.26438061	-6.912117565	0	down	ssc:102166577	uncharacterized LOC102166577
LOC102166576	16959	ncRNA	1.236780616	112.729413	-6.510130564	0	down	ssc:102166576	uncharacterized LOC102166576
LOC102167421	22008	ncRNA	51.12312127	6.785252146	2.913501588	0.007157648	up	ssc:102167421	uncharacterized LOC102167421
LOC100153591	6171	pseudo	0.84639673	23.47612115	-4.793716194	6.11E-09	down	ssc:100153591	uncharacterized LOC100153591
LOC102159806	2064	ncRNA	0	12.82490445	-20	7.71E-05	down	ssc:102159806	uncharacterized LOC102159806
LOC102157625	2266	ncRNA	0.137037773	60.31286317	-8.781748304	0	down	ssc:102157625	uncharacterized LOC102157625
LOC100511462	17618	pseudo	1.866705239	343.2944238	-7.522808475	0	down		uncharacterized LOC100511462
LOC102163060	31898	ncRNA	0.059649128	16.48685645	-8.110599591	3.28E-13	down	ssc:102163060	uncharacterized LOC102163060
LOC102165238	1846	ncRNA	0.341099475	67.50467271	-7.628651026	0	down	ssc:102165238	uncharacterized LOC102165238
LOC102163058	4924	ncRNA	0.253346113	39.50358242	-7.284729985	0	down	ssc:102163058	uncharacterized LOC102163058
LOC102167899	3825	ncRNA	7.744938694	42.22472831	-2.446762416	7.79E-04	down	ssc:102167899	uncharacterized LOC102167899
LOC102167898	1651	ncRNA	0.067023929	23.55831326	-8.457344273	1.09E-13	down	ssc:102167898	uncharacterized LOC102167898
LOC100737242	5040	ncRNA	11.88069272	93.2087871	-2.971847012	0	down	ssc:100737242	uncharacterized LOC100737242
LOC100738575	23717	pseudo	0.068518886	63.22921533	-9.849873895	0	down		prothymosin alpha-like
LOC102166560	37722	ncRNA	0.205556659	33.54612223	-7.350466086	0	down	ssc:102166560	uncharacterized LOC102166560
LOC102167412	2953	ncRNA	2.373297479	28.56909648	-3.58949056	6.16E-05	down	ssc:102167412	uncharacterized LOC102167412
LOC102164385	1097	ncRNA	0.196686901	17.63314283	-6.486244948	2.43E-11	down	ssc:102164385	uncharacterized LOC102164385
LOC102167411	10924	ncRNA	0.196686901	9.418335068	-5.581499267	1.55E-06	down	ssc:102167411	uncharacterized LOC102167411
LOC102165233	867	ncRNA	0.324854915	16.57345171	-5.672934758	5.82E-10	down	ssc:102165233	uncharacterized LOC102165233
LOC100623201	10134	pseudo	0.26371083	20.92669805	-6.310244064	6.28E-10	down		receptor-binding cancer antigen expressed on SiSo cells-like
LOC102158946	1014	ncRNA	0.196686901	42.05007008	-7.740063518	0	down	ssc:102158946	uncharacterized LOC102158946
LOC102158941	3745	ncRNA	0.40224356	42.79566993	-6.733251698	0	down	ssc:102158941	uncharacterized LOC102158941
LOC100518088	4034	ncRNA	730.6804623	147.9237806	2.30438663	6.66E-08	up	ssc:100518088	uncharacterized LOC100518088
LOC102165228	3531	ncRNA	0.137037773	40.41650191	-8.20422704	0	down	ssc:102165228	uncharacterized LOC102165228
LOC102164379	15189	ncRNA	6.368723857	135.8312665	-4.414667477	0	down	ssc:102164379	uncharacterized LOC102164379
LOC102167887	84897	ncRNA	0.068518886	33.46393012	-8.93188947	0	down	ssc:102167887	uncharacterized LOC102167887
LOC102164370	7695	ncRNA	0.655589673	41.10632854	-5.970423582	0	down	ssc:102164370	uncharacterized LOC102164370
LOC102163042	26123	ncRNA	0.068518886	20.26622575	-8.208360015	1.11E-16	down	ssc:102163042	uncharacterized LOC102163042
LOC102164371	5028	ncRNA	0.137037773	16.40319662	-6.903259571	1.44E-06	down	ssc:102164371	uncharacterized LOC102164371
LOC102163041	21171	ncRNA	1.710432991	845.0376213	-8.948510176	0	down	ssc:102163041	uncharacterized LOC102163041
LOC100737215	936	pseudo	0.439668298	38.35729604	-6.446941702	0	down		olfactory receptor 6C3-like
LOC102165224	1731	ncRNA	0.196686901	9.989276683	-5.666407435	3.92E-06	down	ssc:102165224	uncharacterized LOC102165224
LOC102167884	18326	ncRNA	0.330734758	17.63461054	-5.736591231	8.17E-06	down	ssc:102167884	uncharacterized LOC102167884
LOC100622348	38644	pseudo	8.570705978	97.55469487	-3.508725354	0	down	ssc:100622348	zinc finger protein DZIP1L-like
LOC102164375	1083	ncRNA	0.068518886	27.34061799	-8.640328432	0	down	ssc:102164375	uncharacterized LOC102164375
LOC102158938	1066	ncRNA	0.521541815	57.02664652	-6.772709459	0	down	ssc:102158938	uncharacterized LOC102158938
LOC102157607	1627	ncRNA	1.896755176	144.906156	-6.255441601	0	down	ssc:102157607	uncharacterized LOC102157607
LOC102157606	6695	ncRNA	1.571449516	429.6519115	-8.094928578	0	down	ssc:102157606	uncharacterized LOC102157606
LOC102157608	3002	ncRNA	0	10.56462145	-20	0.001306987	down	ssc:102157608	uncharacterized LOC102157608
LOC100512333	8137	pseudo	0.811861921	7.643866142	-3.23499623	0.00680349	down	ssc:100512333	Uncharacterized protein
LOC102158930	1163	pseudo	0.265205787	167.0319782	-9.29879636	0	down		AMMECR1-like protein-like
LOC102166548	862	ncRNA	1.015923623	273.1816193	-8.070924662	0	down	ssc:102166548	uncharacterized LOC102166548
LOC102163036	727	ncRNA	3.217748507	412.1523309	-7.000982271	0	down	ssc:102163036	uncharacterized LOC102163036
LOC102165214	965	pseudo	0.272580588	122.3502929	-8.810119015	0	down		sushi repeat-containing protein SRPX-like
LOC102165698	4643	ncRNA	0.195191943	108.6110013	-9.120061022	0	down	ssc:102165698	uncharacterized LOC102165698
LOC102166546	62635	ncRNA	0.067023929	11.50689527	-7.42360665	2.25E-06	down	ssc:102166546	uncharacterized LOC102166546
LOC102163038	2827	ncRNA	0.587070787	74.20773275	-6.981891251	0	down	ssc:102163038	uncharacterized LOC102163038
LOC102166545	25288	ncRNA	2.040223524	29.39982387	-3.849008387	1.49E-07	down	ssc:102166545	uncharacterized LOC102166545
LOC102166540	9051	ncRNA	0.68219895	192.4513556	-8.140085585	0	down	ssc:102166540	uncharacterized LOC102166540
LOC102164362	6999	pseudo	0.315985156	66.03402105	-7.707208903	0	down		glycine cleavage system H protein, mitochondrial-like
LOC102158919	18448	ncRNA	3.069301805	39.30103758	-3.678584983	8.67E-12	down	ssc:102158919	uncharacterized LOC102158919
LOC102163035	2004	ncRNA	0.47664229	10.07440422	-4.401643753	1.94E-04	down	ssc:102163035	uncharacterized LOC102163035
LOC102162188	9947	ncRNA	3.480315138	121.444712	-5.124937917	0	down	ssc:102162188	uncharacterized LOC102162188
LOC102162187	1302	ncRNA	2.024823203	505.2451684	-7.963043865	0	down	ssc:102162187	uncharacterized LOC102162187
LOC100522117	1344	pseudo	0.187817142	52.90089619	-8.137819611	0	down		heterogeneous nuclear ribonucleoprotein A1 pseudogene
LOC100524776	378	pseudo	0.128168014	26.0211411	-7.665504154	3.66E-15	down		ribosomal protein S25 pseudogene
LOC100523447	21561	ncRNA	84.57849748	8.302870731	3.348608789	0.021278001	up	ssc:100523447	uncharacterized LOC100523447
LOC100525628	843	pseudo	0.135542815	44.4835436	-8.358379265	0	down		interferon omega-1-like
LOC102162575	7344	ncRNA	6.899292668	267.7657464	-5.278379147	0	down	ssc:102162575	uncharacterized LOC102162575
LOC102160397	1388	ncRNA	2.661771869	1062.149545	-8.640384261	0	down	ssc:102160397	uncharacterized LOC102160397
LOC102162577	2221	ncRNA	0	49.86712674	-20	0	down	ssc:102162577	uncharacterized LOC102162577
LOC102163424	3919	ncRNA	0.256336028	9.989276683	-5.284272047	1.02E-05	down	ssc:102163424	uncharacterized LOC102163424
LOC102160399	3511	ncRNA	52.51552341	21.58423493	1.282765986	0.027746565	up	ssc:102160399	uncharacterized LOC102160399
LOC102166930	7973	ncRNA	5.083860279	132.823916	-4.707446747	0	down	ssc:102166930	uncharacterized LOC102166930
LOC102165606	2223	ncRNA	0.875895935	22.613104	-4.690255754	9.76E-06	down	ssc:102165606	uncharacterized LOC102165606
LOC100737672	667	pseudo	0.059649128	6.124779841	-6.682013136	6.75E-04	down		cytochrome c-like
LOC102158073	4226	pseudo	0	32.60531612	-20	0	down		cytochrome c oxidase subunit 7B, mitochondrial-like
LOC102164756	7329	ncRNA	0.067023929	64.95524962	-9.920554153	0	down	ssc:102164756	uncharacterized LOC102164756
LOC102166935	9779	ncRNA	0	24.50058708	-20	1.05E-13	down	ssc:102166935	uncharacterized LOC102166935
LOC102166934	3777	ncRNA	0.24746627	60.22773563	-7.927052315	0	down	ssc:102166934	uncharacterized LOC102166934
LOC102163427	16454	ncRNA	0	11.59349053	-20	0.001412714	down	ssc:102163427	uncharacterized LOC102163427
LOC102160395	22120	ncRNA	1.737592999	496.8395575	-8.159546037	0	down	ssc:102160395	uncharacterized LOC102160395
LOC102161242	22188	ncRNA	0.128168014	43.45467452	-8.405331304	0	down	ssc:102161242	uncharacterized LOC102161242
LOC102163419	8770	ncRNA	54.43066237	3.780837017	3.847642028	9.14E-08	up	ssc:102163419	uncharacterized LOC102163419
LOC100157924	552	pseudo	0.128168014	15.1717827	-6.887210539	2.34E-05	down		39S ribosomal protein L54, mitochondrial-like
LOC102163418	3148	ncRNA	0.324854915	58.25218958	-7.486372937	0	down	ssc:102163418	uncharacterized LOC102163418
LOC102160385	1481	ncRNA	0.128168014	7.156584353	-5.803163022	2.22E-05	down	ssc:102160385	uncharacterized LOC102160385
LOC102166922	2927	ncRNA	114.6191012	230.9319398	-1.010620235	2.30E-12	down	ssc:102166922	uncharacterized LOC102166922
LOC102163894	3198	ncRNA	0.801497205	57.14112839	-6.155688227	0	down	ssc:102163894	uncharacterized LOC102163894
LOC102161233	4166	ncRNA	0.196686901	51.10000837	-8.02127884	0	down	ssc:102161233	uncharacterized LOC102161233
LOC102163413	2174	ncRNA	0.137037773	13.93890107	-6.668399404	1.23E-09	down	ssc:102163413	uncharacterized LOC102163413
LOC102159395	5107	ncRNA	1.707443076	26.39100559	-3.950136936	4.08E-08	down	ssc:102159395	uncharacterized LOC102159395
LOC102161236	1244	ncRNA	0.324854915	23.7608581	-6.192647596	1.22E-11	down	ssc:102161236	uncharacterized LOC102161236
LOC102160389	3271	ncRNA	11.35631823	138.3454644	-3.60670826	0	down	ssc:102160389	uncharacterized LOC102160389
LOC102163414	14440	ncRNA	0.119298255	16.85818865	-7.142732777	7.21E-11	down	ssc:102163414	uncharacterized LOC102163414
LOC102159390	4332	ncRNA	76.42024254	6.78378443	3.493792606	0.002059572	up	ssc:102159390	uncharacterized LOC102159390
LOC100516704	978	pseudo	0.324854915	284.433132	-9.774078279	0	down		5'-nucleotidase, cytosolic IIIA pseudogene
LOC100739865	30787	pseudo	8.987448368	576.2562152	-6.002655018	0	down		heterogeneous nuclear ribonucleoprotein A3-like
LOC100739862	17280	pseudo	60.77727473	196.1822903	-1.690590923	0	down	ssc:100739862	hydrolethalus syndrome protein 1 homolog
LOC102160382	1426	pseudo	0.265205787	218.4240621	-9.685803824	0	down		heterogeneous nuclear ribonucleoprotein A3 pseudogene
LOC102166911	4685	ncRNA	0.332229716	251.594449	-9.564703257	0	down	ssc:102166911	uncharacterized LOC102166911
LOC102159385	8847	ncRNA	2.802250302	262.0211051	-6.546953386	0	down	ssc:102159385	uncharacterized LOC102159385
LOC102160375	1005	ncRNA	0.135542815	25.44726405	-7.5526181	0	down	ssc:102160375	uncharacterized LOC102160375
LOC102162557	4000	ncRNA	0.604810304	78.15148627	-7.013646781	0	down	ssc:102162557	uncharacterized LOC102162557
LOC102161226	9246	ncRNA	0.528916617	78.26743585	-7.209228071	0	down	ssc:102161226	uncharacterized LOC102161226
LOC102164737	15834	ncRNA	3.522918202	718.582126	-7.672238263	0	down	ssc:102164737	uncharacterized LOC102164737
LOC102163889	12216	ncRNA	0.26371083	58.83340521	-7.801534912	0	down	ssc:102163889	uncharacterized LOC102163889
LOC102161228	31116	ncRNA	0.068518886	18.00594275	-8.037755717	1.09E-08	down	ssc:102161228	uncharacterized LOC102161228
LOC100153575	1399	pseudo	0.059649128	38.64496842	-9.339563832	0	down		tetratricopeptide repeat protein 1-like
LOC100515881	13323	pseudo	0.339604517	23.27064088	-6.098511484	7.66E-15	down		40S ribosomal protein S15-like
LOC100157942	3148	pseudo	2.367066877	305.2996537	-7.010981675	0	down		actin-related protein 2/3 complex subunit 3-like
LOC100516731	2585	ncRNA	166.2754192	550.2438804	-1.726496287	3.74E-11	down	ssc:100516731	uncharacterized LOC100516731
LOC102162549	1926	pseudo	8.856798434	44.60096089	-2.332217601	1.28E-08	down		solute carrier family 25 member 36-like
LOC102166905	983	ncRNA	0	89.4558367	-20	0	down	ssc:102166905	uncharacterized LOC102166905
LOC102164728	8395	ncRNA	1.546785942	142.5328588	-6.525877182	0	down	ssc:102164728	uncharacterized LOC102164728
LOC100156618	5017	pseudo	0.134047858	34.78193929	-8.019446399	0	down		N-acetyllactosaminide alpha-1,3-galactosyltransferase-like
LOC102158056	11400	ncRNA	0.265205787	70.79235708	-8.060337545	0	down	ssc:102158056	uncharacterized LOC102158056
LOC102158042	593	ncRNA	0.128168014	16.20065178	-6.981871781	2.36E-12	down	ssc:102158042	uncharacterized LOC102158042
LOC102164722	14885	ncRNA	0.256336028	32.88858535	-7.003406879	0	down	ssc:102164722	uncharacterized LOC102164722
LOC102166902	6791	ncRNA	0.26371083	33.37880258	-6.983831572	0	down	ssc:102166902	uncharacterized LOC102166902
LOC102164724	4943	ncRNA	2.703681479	142.4946982	-5.719839234	0	down	ssc:102164724	uncharacterized LOC102164724
LOC102163878	15288	ncRNA	0.059649128	64.00857265	-10.06754838	0	down	ssc:102163878	uncharacterized LOC102163878
LOC100739843	10604	pseudo	0.265205787	90.40104595	-8.413083398	0	down		uncharacterized LOC100739843
LOC100154433	954	pseudo	0.466277574	59.2487689	-6.989452324	0	down		5'-AMP-activated protein kinase subunit gamma-1-like
LOC100518908	7308	pseudo	11.27409395	53.64502832	-2.250432977	8.86E-08	down	ssc:100518908	Uncharacterized protein
LOC100153586	7500	pseudo	1.866705239	252.1947449	-7.077900266	0	down	ssc:100153586	tRNA selenocysteine 1-associated protein 1-like
LOC102163871	1784	ncRNA	0.767513127	163.1748199	-7.732011306	0	down	ssc:102163871	uncharacterized LOC102163871
LOC100620596	798	pseudo	381.0965795	52.70568993	2.854126035	7.35E-04	up	ssc:100620596	chloride intracellular channel protein 1-like
LOC102161207	2287	ncRNA	0	18.951152	-20	3.38E-11	down	ssc:102161207	uncharacterized LOC102161207
LOC102163465	625	ncRNA	0.746232963	365.2646681	-8.935100404	0	down	ssc:102163465	uncharacterized LOC102163465
LOC102162134	2364	ncRNA	0.119298255	13.56903658	-6.829601535	3.63E-04	down	ssc:102162134	uncharacterized LOC102162134
LOC102163468	6277	ncRNA	0.068518886	38.32794171	-9.127679104	0	down	ssc:102163468	uncharacterized LOC102163468
LOC102164797	3615	ncRNA	1.224470197	525.9003389	-8.746487956	0	down	ssc:102164797	uncharacterized LOC102164797
LOC102162139	33297	ncRNA	0.205556659	15.08812288	-6.197733409	7.17E-06	down	ssc:102162139	uncharacterized LOC102162139
LOC102164790	9412	ncRNA	0.196686901	141.2926386	-9.488569711	0	down	ssc:102164790	uncharacterized LOC102164790
LOC102164791	903	ncRNA	0.137037773	26.02260881	-7.569048181	1.11E-16	down	ssc:102164791	uncharacterized LOC102164791
LOC102167820	855	ncRNA	0.059649128	23.47318572	-8.620296898	1.09E-13	down	ssc:102167820	uncharacterized LOC102167820
LOC102165641	1951	ncRNA	0.204061702	60.51540801	-8.212153264	0	down	ssc:102165641	uncharacterized LOC102165641
LOC102164310	25345	ncRNA	0.327744843	78.35256339	-7.901263583	0	down	ssc:102164310	uncharacterized LOC102164310
LOC102166971	3091	ncRNA	0.137037773	36.66942237	-8.06386012	0	down	ssc:102166971	uncharacterized LOC102166971
LOC100739811	13565	pseudo	1.407802467	121.3184884	-6.429210698	0	down		general transcription factor IIE subunit 1-like
LOC100524382	8172	pseudo	0.700489198	114.7299102	-7.355663033	0	down		L-amino-acid oxidase-like
LOC100511067	555	pseudo	0.128168014	20.92523034	-7.351063428	3.26E-10	down		glycine cleavage system H protein, mitochondrial-like
LOC102167819	46588	ncRNA	27.79186913	108.5258737	-1.965304266	5.39E-13	down	ssc:102167819	uncharacterized LOC102167819
LOC102167813	8883	pseudo	0.137037773	34.66305428	-7.98268136	0	down		vomeronasal type-2 receptor 26-like
LOC102166966	101547	ncRNA	0.5185519	15.37432754	-4.889891108	0.002300543	down	ssc:102166966	uncharacterized LOC102166966
LOC102161278	2721	pseudo	0.769008085	89.6275595	-6.864799837	0	down		DNA (cytosine-5)-methyltransferase 1-like
LOC102162126	94821	ncRNA	19.4357323	0.945209254	4.361933902	3.53E-04	up	ssc:102162126	uncharacterized LOC102162126
LOC102163459	1647	ncRNA	1.087332438	319.1460886	-8.197280063	0	down	ssc:102163459	uncharacterized LOC102163459
LOC102165639	2152	ncRNA	0	14.59643794	-20	8.60E-05	down	ssc:102165639	uncharacterized LOC102165639
LOC102167815	617	ncRNA	0.196686901	69.96750055	-8.474640268	0	down	ssc:102167815	uncharacterized LOC102167815
LOC102164305	6799	ncRNA	0.409618361	262.6654325	-9.324730249	0	down	ssc:102164305	uncharacterized LOC102164305
LOC102166967	17296	ncRNA	3.797795251	97.5576303	-4.683020682	0	down	ssc:102166967	uncharacterized LOC102166967
LOC102167814	20246	ncRNA	0	58.25512501	-20	0	down	ssc:102167814	uncharacterized LOC102167814
LOC100516749	599	pseudo	0.137037773	101.5072547	-9.532793514	0	down		YKT6 v-SNARE homolog (S. cerevisiae) pseudogene
LOC100737643	3114	ncRNA	7.864043427	53.1548111	-2.756857084	4.87E-07	down	ssc:100737643	uncharacterized LOC100737643
LOC102162120	7830	ncRNA	0.391878844	37.32695924	-6.573666489	0	down	ssc:102162120	uncharacterized LOC102162120
LOC102163451	76181	ncRNA	9.995603695	240.4530151	-4.588317503	0	down	ssc:102163451	uncharacterized LOC102163451
LOC102163450	62529	ncRNA	1.278139495	567.9518767	-8.795579584	0	down	ssc:102163450	uncharacterized LOC102163450
LOC100523061	3863	pseudo	0.479632205	41.18998837	-6.424221376	0	down		olfactory receptor 6C68-like
LOC100515894	6150	ncRNA	12.5482993	2038.173502	-7.343641211	0	down	ssc:100515894	uncharacterized LOC100515894
LOC102162597	6130	ncRNA	0.710753928	54.10295579	-6.250213437	0	down	ssc:102162597	uncharacterized LOC102162597
LOC102163443	18112	ncRNA	0.511177099	24.21878556	-5.566159509	4.14E-11	down	ssc:102163443	uncharacterized LOC102163443
LOC102164777	66631	ncRNA	1.696627615	237.0493811	-7.126373867	0	down	ssc:102164777	uncharacterized LOC102164777
LOC102158098	2717	ncRNA	0.128168014	68.81827874	-9.068611733	0	down	ssc:102158098	uncharacterized LOC102158098
LOC102164775	6040	ncRNA	0.128168014	232.7313599	-10.82641364	0	down	ssc:102164775	uncharacterized LOC102164775
LOC102166959	3975	ncRNA	0.135542815	20.06661634	-7.209904914	3.15E-10	down	ssc:102166959	uncharacterized LOC102166959
LOC102158093	4681	ncRNA	0.068518886	31.94631153	-8.864931949	0	down	ssc:102158093	uncharacterized LOC102158093
LOC102162117	4772	ncRNA	2.820440565	1392.770239	-8.94782103	0	down	ssc:102162117	uncharacterized LOC102162117
LOC102158092	2322	ncRNA	0.256336028	11.59202281	-5.498952263	4.76E-06	down	ssc:102158092	uncharacterized LOC102158092
LOC100152206	3039	pseudo	4.417905889	29.43064591	-2.735884613	0.04600702	down	ssc:100152206	C2 calcium-dependent domain-containing protein 4A-like
LOC102165625	3767	ncRNA	0.205556659	14.79898278	-6.169818093	0.001814523	down	ssc:102165625	uncharacterized LOC102165625
LOC102167804	11691	ncRNA	0	20.84157051	-20	9.19E-14	down	ssc:102167804	uncharacterized LOC102167804
LOC102162118	1656	ncRNA	0.265205787	78.80608771	-8.215051014	0	down	ssc:102162118	uncharacterized LOC102162118
LOC102163449	7051	ncRNA	0.740903851	35.06814396	-5.564730933	0	down	ssc:102163449	uncharacterized LOC102163449
LOC102162591	5046	ncRNA	0.068518886	10.56608916	-7.268724069	1.86E-09	down	ssc:102162591	uncharacterized LOC102162591
LOC102161260	1499	ncRNA	0.128168014	140.613086	-10.09947888	0	down	ssc:102161260	uncharacterized LOC102161260
LOC102161263	8592	ncRNA	0	95.46319924	-20	0	down	ssc:102161263	uncharacterized LOC102161263
LOC102162594	24113	ncRNA	0.40224356	378.449163	-9.877814478	0	down	ssc:102162594	uncharacterized LOC102162594
SLA-DRB5	8127	pseudo	0.511177099	14.88557804	-4.863948231	0.026863784	down		MHC class II, DR beta-like 5 pseudogene
SLA-DRB4	10565	pseudo	7.047445861	183.4058205	-4.701795124	0	down		MHC class II, DR beta-like 4 pseudogene
LOC100621890	1116	pseudo	0.067023929	13.28136419	-7.630511366	9.79E-04	down		taste receptor type 2 member 39-like
LOC102165612	11426	ncRNA	0.119298255	25.16105939	-7.720475912	6.58E-14	down	ssc:102165612	uncharacterized LOC102165612
LOC102162104	810	pseudo	0.068518886	33.66500724	-8.940532354	0	down		60S ribosomal protein L35a-like
LOC102158088	58665	ncRNA	2.02492319	17.51719324	-3.112832543	3.88E-05	down	ssc:102158088	uncharacterized LOC102158088
LOC102165617	6155	ncRNA	0.128168014	31.94484382	-7.961403011	0	down	ssc:102165617	uncharacterized LOC102165617
LOC102164761	1073	ncRNA	1.604940112	26.47906856	-4.044261004	2.39E-06	down	ssc:102164761	uncharacterized LOC102164761
LOC100736776	7083	pseudo	0.196686901	23.92964547	-6.926754335	0	down		T-complex protein 1 subunit zeta-like
LOC102161252	8883	ncRNA	0.059649128	76.08934496	-10.31697769	0	down	ssc:102161252	uncharacterized LOC102161252
LOC102165607	57094	ncRNA	0.196686901	6.698656888	-5.089899075	3.95E-04	down	ssc:102165607	uncharacterized LOC102165607
LOC102158594	3128	ncRNA	0.128168014	23.84451792	-7.53947754	1.13E-12	down	ssc:102158594	uncharacterized LOC102158594
LOC102162612	5286	ncRNA	1.259455751	20.55389813	-4.028539691	0.00795905	down	ssc:102162612	uncharacterized LOC102162612
LOC102160433	16858	ncRNA	0.384504042	68.6157339	-7.479396855	0	down	ssc:102160433	uncharacterized LOC102160433
LOC102162611	5761	ncRNA	1.7577717	786.5183073	-8.805588831	0	down	ssc:102162611	uncharacterized LOC102162611
LOC102163945	20339	ncRNA	0.435283411	18.4624025	-5.406491452	8.87E-12	down	ssc:102163945	uncharacterized LOC102163945
LOC100151775	489	pseudo	0.265205787	107.3795873	-8.661391794	0	down		ubiquitin-fold modifier conjugating enzyme 1 pseudogene
LOC102163944	4939	ncRNA	0.514067028	6.124779841	-3.574629601	0.039283906	down	ssc:102163944	uncharacterized LOC102163944
LOC102161767	72915	ncRNA	0.383009085	15.37285983	-5.326863153	0.004453655	down	ssc:102161767	uncharacterized LOC102161767
LOC100736861	1428	ncRNA	4.850342108	599.5444687	-6.949636445	0	down	ssc:100736861	uncharacterized LOC100736861
LOC102167061	62915	ncRNA	29.69464043	74.54530748	-1.327914977	2.11E-06	down	ssc:102167061	uncharacterized LOC102167061
LOC102159448	1497	ncRNA	0.539281333	5.840042892	-3.436868964	0.006942737	down	ssc:102159448	uncharacterized LOC102159448
LOC102158116	3449	ncRNA	3.545944095	28.73935156	-3.018785815	0.032323046	down	ssc:102158116	uncharacterized LOC102158116
LOC100526008	631	pseudo	0.059649128	31.11705186	-9.026988625	0	down		60S ribosomal protein L10-like
LOC102159449	1167	ncRNA	0.067023929	48.63718054	-9.503167624	0	down	ssc:102159449	uncharacterized LOC102159449
LOC102163938	2829	ncRNA	0.685188865	63.89262306	-6.543003854	0	down	ssc:102163938	uncharacterized LOC102163938
LOC100520705	594	pseudo	0	44.19880665	-20	0	down		ribosomal protein L17 pseudogene
LOC102158596	9301	ncRNA	0.128168014	14.05631837	-6.777038697	3.18E-11	down	ssc:102158596	uncharacterized LOC102158596
LOC102158597	1182	ncRNA	8.575584345	450.0120711	-5.71358491	0	down	ssc:102158597	uncharacterized LOC102158597
LOC102159430	49059	ncRNA	0.536291418	169.039814	-8.300130203	0	down	ssc:102159430	uncharacterized LOC102159430
LOC100516669	2588	ncRNA	5.013746448	22.69676383	-2.178525664	0.020258117	down	ssc:100516669	uncharacterized LOC100516669
LOC102158109	4950	ncRNA	141.588243	22423.66147	-7.307176585	0	down	ssc:102158109	uncharacterized LOC102158109
LOC102167052	3281	ncRNA	4.480544932	57.8559062	-3.690718133	0	down	ssc:102167052	uncharacterized LOC102167052
LOC102159437	1191	ncRNA	68.76598342	26.59501815	1.37053906	0.042683878	up	ssc:102159437	uncharacterized LOC102159437
LOC102161749	33973	ncRNA	1.108512616	87.65348116	-6.305114294	0	down	ssc:102161749	uncharacterized LOC102161749
LOC102158587	3309	ncRNA	0.137037773	20.06368091	-7.193868888	1.06E-11	down	ssc:102158587	uncharacterized LOC102158587
LOC102161741	3076	ncRNA	17.62253912	161.3328361	-3.194546387	0	down	ssc:102161741	uncharacterized LOC102161741
LOC102161742	24804	ncRNA	0.40224356	7.814121226	-4.279942409	3.87E-04	down	ssc:102161742	uncharacterized LOC102161742
LOC102160896	1765	ncRNA	0.786747602	679.8079986	-9.755010744	0	down	ssc:102160896	uncharacterized LOC102160896
LOC102160897	8483	ncRNA	0.342594432	6.413919939	-4.226632735	2.68E-04	down	ssc:102160897	uncharacterized LOC102160897
LOC102163922	11797	ncRNA	1.973693076	1523.483579	-9.592260577	0	down	ssc:102163922	uncharacterized LOC102163922
LOC102167048	17059	ncRNA	1.349648297	392.0871823	-8.182447163	0	down	ssc:102167048	uncharacterized LOC102167048
LOC102166190	2912	ncRNA	3.109916431	42.5945928	-3.77572258	2.33E-12	down	ssc:102166190	uncharacterized LOC102166190
LOC100518879	338	pseudo	0	44.65233096	-20	0	down		40S ribosomal protein S27-like
LOC102161736	2383	ncRNA	0.570826227	8.672735222	-3.925363538	0.002506071	down	ssc:102161736	uncharacterized LOC102161736
LOC102159425	43118	ncRNA	1.025344113	197.4078334	-7.588927258	0	down	ssc:102159425	uncharacterized LOC102159425
LOC102166187	5111	pseudo	0.137037773	58.6249895	-8.740798339	0	down		mitochondrial assembly of ribosomal large subunit protein 1-like
LOC102166188	39868	ncRNA	0.406628446	123.1751494	-8.242784363	0	down	ssc:102166188	uncharacterized LOC102166188
LOC102166185	16286	ncRNA	4.621516846	30.37585516	-2.716486678	2.56E-09	down	ssc:102166185	uncharacterized LOC102166185
LOC102167032	1800	pseudo	0.137037773	23.10185351	-7.397291186	1.11E-12	down		olfactory receptor 6C2-like
LOC102166186	2559	ncRNA	0.068518886	26.6816134	-8.605128486	0	down	ssc:102166186	uncharacterized LOC102166186
LOC102167036	516	pseudo	1.625118813	350.110498	-7.751121313	0	down		uncharacterized LOC102167036
LOC102166181	9246	ncRNA	0.307115397	139.0030013	-8.822119474	0	down	ssc:102166181	uncharacterized LOC102166181
LOC102158568	4550	ncRNA	0.709358957	26.0211411	-5.19702456	1.07E-09	down	ssc:102158568	uncharacterized LOC102158568
LOC102161728	2922	ncRNA	0.324854915	17.34693816	-5.738741699	1.18E-04	down	ssc:102161728	uncharacterized LOC102161728
LOC102159000	1951	ncRNA	1.135221878	657.3651497	-9.177576865	0	down	ssc:102159000	uncharacterized LOC102159000
LOC102162652	3601	ncRNA	0.664459432	165.832854	-7.96333302	0	down	ssc:102162652	uncharacterized LOC102162652
LOC102160474	2680	ncRNA	0.195191943	49.49579453	-7.986268636	0	down	ssc:102160474	uncharacterized LOC102160474
LOC102161322	5106	ncRNA	3.129050919	159.791734	-5.674323834	0	down	ssc:102161322	uncharacterized LOC102161322
LOC102163502	1519	ncRNA	0.271085631	13.56903658	-5.645425837	0.006199745	down	ssc:102163502	uncharacterized LOC102163502
LOC102163505	10656	ncRNA	1.25890502	447.5008086	-8.473577038	0	down	ssc:102163505	uncharacterized LOC102163505
LOC100156194	2387	pseudo	0.527421659	334.6686555	-9.309560904	0	down		mitogen-activated protein kinase 6-like
LOC102162650	16347	ncRNA	0.068518886	27.4228101	-8.644658995	0	down	ssc:102162650	uncharacterized LOC102162650
LOC102160471	46009	pseudo	0.137037773	87.28361667	-9.314993461	0	down		40S ribosomal protein S3a-like
LOC102163980	1184	pseudo	34.64550835	551.5017132	-3.992625138	1.31E-08	down		adenylate kinase 3 pseudogene
LOC102161318	12405	ncRNA	0.137037773	20.80928075	-7.24650968	2.51E-13	down	ssc:102161318	uncharacterized LOC102161318
LOC102161319	1490	ncRNA	1.702507459	413.2912787	-7.923353991	0	down	ssc:102161319	uncharacterized LOC102161319
LOC102159002	4360	ncRNA	0	103.1114685	-20	0	down	ssc:102159002	uncharacterized LOC102159002
LOC102159486	26266	ncRNA	0.934050105	308.5227585	-8.367661257	0	down	ssc:102159486	uncharacterized LOC102159486
LOC102164820	2244	ncRNA	0.195191943	58.2815439	-8.222001781	0	down	ssc:102164820	uncharacterized LOC102164820
LOC102158141	26048	ncRNA	0.315985156	39.95857445	-6.982504518	0	down	ssc:102158141	uncharacterized LOC102158141
LOC102160463	5161	ncRNA	0.494932539	18.74713945	-5.243294772	6.42E-08	down	ssc:102160463	uncharacterized LOC102160463
LOC102161311	2429	ncRNA	0.068518886	16.97560595	-7.952745652	2.04E-14	down	ssc:102161311	uncharacterized LOC102161311
LOC102159472	8173	ncRNA	1.400427665	684.3902087	-8.932807842	0	down	ssc:102159472	uncharacterized LOC102159472
LOC102160466	3613	ncRNA	0.119298255	139.8968405	-10.19557472	0	down	ssc:102160466	uncharacterized LOC102160466
LOC102163978	1365	ncRNA	0	71.86085449	-20	0	down	ssc:102163978	uncharacterized LOC102163978
LOC102167099	3591	ncRNA	0.059649128	10.8493584	-7.506892972	3.00E-07	down	ssc:102167099	uncharacterized LOC102167099
LOC100510923	7165	ncRNA	0.996689148	223.2352359	-7.807205427	0	down	ssc:100510923	uncharacterized LOC100510923
LOC100519736	401	pseudo	0.068518886	18.951152	-8.111568129	6.09E-10	down		fatty acid-binding protein, heart-like
LOC100627126	110724	pseudo	22.13687461	57.26148112	-1.371113438	1.48E-05	down	ssc:100627126	reelin-like
LOC102163968	1400	ncRNA	2.660727657	502.0528856	-7.559874685	0	down	ssc:102163968	uncharacterized LOC102163968
LOC102161309	3416	ncRNA	0.254841071	64.12598994	-7.975167578	0	down	ssc:102161309	uncharacterized LOC102161309
LOC102164819	5101	ncRNA	0.323359957	113.0170854	-8.449184138	0	down	ssc:102164819	uncharacterized LOC102164819
LOC102162632	24456	ncRNA	0.068518886	23.10185351	-8.397291186	1.08E-13	down	ssc:102162632	uncharacterized LOC102162632
LOC102160456	5090	ncRNA	0.469267489	40.73939948	-6.439870391	0	down	ssc:102160456	uncharacterized LOC102160456
LOC102161305	4161	pseudo	0.384504042	116.8801145	-8.247815016	0	down		tigger transposable element-derived protein 1-like
LOC102162635	21822	ncRNA	1.801627013	182.5780285	-6.663068988	0	down	ssc:102162635	uncharacterized LOC102162635
LOC102160448	1680	ncRNA	0.196686901	27.05147789	-7.103662727	1.78E-15	down	ssc:102160448	uncharacterized LOC102160448
LOC102162627	5687	ncRNA	0.469267489	66.15143835	-7.139218202	0	down	ssc:102162627	uncharacterized LOC102162627
LOC102164806	7635	ncRNA	0.068518886	14.88411032	-7.763055568	5.90E-05	down	ssc:102164806	uncharacterized LOC102164806
LOC102163958	14610	ncRNA	0.128168014	19.9814888	-7.284484005	3.13E-10	down	ssc:102163958	uncharacterized LOC102163958
LOC102163957	14479	ncRNA	2.040717005	465.3012711	-7.832945187	0	down	ssc:102163957	uncharacterized LOC102163957
LOC100627590	1428	pseudo	0.128168014	16.11552424	-6.974271045	2.46E-05	down		olfactory receptor 6C2-like
LOC102158136	6655	ncRNA	0.067023929	12.45503995	-7.537837675	5.08E-05	down	ssc:102158136	uncharacterized LOC102158136
LOC102159452	15488	ncRNA	0.461892688	20.26769346	-5.455480397	4.59E-07	down	ssc:102159452	uncharacterized LOC102159452
LOC102160443	2358	ncRNA	0.067023929	17.71827037	-8.046345802	1.83E-14	down	ssc:102160443	uncharacterized LOC102160443
LOC102164802	12092	ncRNA	0.400748602	110.210812	-8.103352558	0	down	ssc:102164802	uncharacterized LOC102164802
LOC102162623	61400	ncRNA	5.416740713	531.894492	-6.617571253	0	down	ssc:102162623	uncharacterized LOC102162623
LOC102164800	9193	ncRNA	0.196686901	16.48832416	-6.389400087	7.72E-06	down	ssc:102164800	uncharacterized LOC102164800
LOC102167075	3692	ncRNA	0.871511049	332.5463378	-8.575820713	0	down	ssc:102167075	uncharacterized LOC102167075
LOC102163947	13421	ncRNA	1.620733927	158.7291075	-6.613775635	0	down	ssc:102163947	uncharacterized LOC102163947
LOC102160438	857	ncRNA	0	19.60722116	-20	6.94E-10	down	ssc:102160438	uncharacterized LOC102160438
LOC102159455	1241	ncRNA	0.119298255	173.0686951	-10.50255613	0	down	ssc:102159455	uncharacterized LOC102159455
LOC102158124	74012	ncRNA	0.24746627	12.82343673	-5.695407257	2.97E-06	down	ssc:102158124	uncharacterized LOC102158124
LOC102158990	24683	ncRNA	0.137037773	42.88226519	-8.289663695	0	down	ssc:102158990	uncharacterized LOC102158990
LOC102166139	18166	ncRNA	0.461892688	67.75565219	-7.196639784	0	down	ssc:102166139	uncharacterized LOC102166139
LOC102167469	20336	ncRNA	0.341099475	184.5007368	-9.079218329	0	down	ssc:102167469	uncharacterized LOC102167469
LOC100516279	802	pseudo	0.926675304	58.2536573	-5.974140894	0	down	ssc:100516279	ribosomal protein S6 pseudogene
LOC100516278	37746	pseudo	3.648997791	34.29172207	-3.232288173	8.19E-11	down		plectin-like
LOC102165281	1629	ncRNA	0.128168014	16.89488156	-7.042406161	5.65E-12	down	ssc:102165281	uncharacterized LOC102165281
LOC102159846	15848	ncRNA	0.470762446	16.40319662	-5.122833943	9.59E-04	down	ssc:102159846	uncharacterized LOC102159846
LOC102165280	1318	ncRNA	3.058035599	479.1961407	-7.291867278	0	down	ssc:102165280	uncharacterized LOC102165280
LOC102160822	900	pseudo	0.536291418	211.3115092	-8.622138465	0	down		60S ribosomal protein L7a-like
LOC102157665	2826	ncRNA	0.87888585	16.97707367	-4.271768193	0.010076571	down	ssc:102157665	uncharacterized LOC102157665
LOC102158513	14999	ncRNA	0.059649128	16.0303967	-8.070093372	5.17E-13	down	ssc:102158513	uncharacterized LOC102158513
LOC102158991	2861	ncRNA	3.467160479	64.9537819	-4.227587009	0	down	ssc:102158991	uncharacterized LOC102158991
LOC102158994	1259	ncRNA	0.137037773	18.66347962	-7.089500567	9.23E-08	down	ssc:102158994	uncharacterized LOC102158994
LOC102160828	3758	ncRNA	0.384504042	18.95261972	-5.623254702	1.36E-07	down	ssc:102160828	uncharacterized LOC102160828
LOC102160829	5116	ncRNA	1.160336197	217.6109473	-7.551064452	0	down	ssc:102160829	uncharacterized LOC102160829
LOC102163095	4386	ncRNA	0.068518886	12.45357224	-7.50584221	9.28E-04	down	ssc:102163095	uncharacterized LOC102163095
LOC102167453	4629	ncRNA	3.138471409	50.89599582	-4.019418187	0	down	ssc:102167453	uncharacterized LOC102167453
LOC102163097	1073	pseudo	0.059649128	149.8582306	-11.29480966	0	down		presenilin enhancer gamma secretase subunit pseudogene
LOC100520798	867	pseudo	0.265205787	13.4809736	-5.667668625	2.60E-05	down		tyrosine 3-monooxygenase/tryptophan 5-monooxygenase activation protein, zeta polypeptide pseudogene
LOC102163091	43246	ncRNA	0.391878844	123.9192816	-8.304777281	0	down	ssc:102163091	uncharacterized LOC102163091
LOC100522972	645	pseudo	1.499940714	323.1617602	-7.751207205	0	down		interferon omega-1-like
LOC100516260	7423	ncRNA	1.151917183	20.26769346	-4.137073011	0.002614315	down	ssc:100516260	uncharacterized LOC100516260
LOC102158502	6296	ncRNA	0.390383886	241.8282652	-9.274873659	0	down	ssc:102158502	uncharacterized LOC102158502
LOC102160816	4900	ncRNA	0.068518886	55.50315707	-9.661852415	0	down	ssc:102160816	uncharacterized LOC102160816
LOC102158982	717	ncRNA	0	36.78830738	-20	0	down	ssc:102158982	uncharacterized LOC102158982
LOC102167442	41938	ncRNA	0.274075546	195.3119346	-9.476990782	0	down	ssc:102167442	uncharacterized LOC102167442
LOC100739038	2433	pseudo	16.78511213	436.9449935	-4.702197592	0	down	ssc:100739038	tigger transposable element-derived protein 1-like
LOC102167444	814	ncRNA	0.603315347	272.205588	-8.817568687	0	down	ssc:102167444	uncharacterized LOC102167444
LOC102167443	2842	ncRNA	1.83815026	579.3912571	-8.300139399	0	down	ssc:102167443	uncharacterized LOC102167443
LOC102159829	16410	ncRNA	0.126673057	64.20671434	-8.985470667	0	down	ssc:102159829	uncharacterized LOC102159829
LOC102157646	202599	ncRNA	0.525926702	15.00299534	-4.834245007	0.002256402	down	ssc:102157646	uncharacterized LOC102157646
LOC102157648	1243	ncRNA	0.137037773	14.42765057	-6.718118967	3.83E-04	down	ssc:102157648	uncharacterized LOC102157648
LOC102160800	3157	pseudo	3.733016984	83.42058755	-4.481989496	0	down		uncharacterized LOC102160800
LOC100623192	5478	pseudo	0.128168014	29.31176089	-7.837299565	0	down		zinc finger protein 330-like
LOC102157645	28489	ncRNA	1.278139495	763.1229106	-9.22172633	0	down	ssc:102157645	uncharacterized LOC102157645
LOC102158972	5280	ncRNA	0.068518886	53.61420628	-9.611897905	0	down	ssc:102158972	uncharacterized LOC102158972
LOC100623190	6592	pseudo	0.24746627	36.95709475	-7.222475644	0	down		multidrug resistance protein 1-like
LOC102166589	5853	ncRNA	0.315985156	27.99668715	-6.469255526	3.44E-15	down	ssc:102166589	uncharacterized LOC102166589
LOC102166109	34111	ncRNA	5.52168286	366.4447119	-6.052343707	0	down	ssc:102166109	uncharacterized LOC102166109
LOC102165252	2320	ncRNA	0.205556659	21.87043959	-6.733302297	1.26E-10	down	ssc:102165252	uncharacterized LOC102165252
LOC102163072	1510	ncRNA	0.274075546	51.95862237	-7.566645759	0	down	ssc:102163072	uncharacterized LOC102163072
LOC102166583	1722	ncRNA	0.068518886	46.00409761	-9.391044948	0	down	ssc:102166583	uncharacterized LOC102166583
LOC102167434	5995	ncRNA	0.195191943	139.8939051	-9.485223889	0	down	ssc:102167434	uncharacterized LOC102167434
LOC102167433	4715	ncRNA	0.810366964	249.7612714	-8.26775871	0	down	ssc:102167433	uncharacterized LOC102167433
LOC102165254	7488	ncRNA	0	19.40761175	-20	3.45E-11	down	ssc:102165254	uncharacterized LOC102165254
LOC102165255	1437	ncRNA	0.390383886	173.7849406	-8.798193851	0	down	ssc:102165255	uncharacterized LOC102165255
LOC102166585	16155	ncRNA	0.178947383	28.16694223	-7.298323699	0	down	ssc:102166585	uncharacterized LOC102166585
LOC100517136	328	pseudo	0.059649128	22.24030408	-8.542459758	8.88E-16	down		NADH dehydrogenase (ubiquinone) 1 beta subcomplex, 3, 12kDa pseudogene
LOC100519312	3702	pseudo	0.137037773	10.56168601	-6.268122737	1.08E-04	down		olfactory receptor 6C75-like
LOC102158968	2900	ncRNA	0.411113319	53.81528341	-7.032336031	0	down	ssc:102158968	uncharacterized LOC102158968
LOC102159880	12722	ncRNA	0.607800219	32.80786096	-5.754300529	0	down	ssc:102159880	uncharacterized LOC102159880
LOC102167029	26241	ncRNA	1.177131489	100.7939446	-6.419989676	0	down	ssc:102167029	uncharacterized LOC102167029
LOC102160873	3087	ncRNA	0.187817142	38.760918	-7.689130187	0	down	ssc:102160873	uncharacterized LOC102160873
LOC102166176	231303	ncRNA	0.068518886	108.860513	-10.63369141	0	down	ssc:102166176	uncharacterized LOC102166176
LOC100620901	705	pseudo	0.187817142	36.87343493	-7.617109264	0	down		M-phase-specific PLK1-interacting protein-like
LOC102167028	3630	ncRNA	3.211868663	219.4661406	-6.094441666	0	down	ssc:102167028	uncharacterized LOC102167028
LOC102166178	63923	ncRNA	0.137037773	13.7701137	-6.650823051	3.68E-04	down	ssc:102166178	uncharacterized LOC102166178
LOC102167025	5042	ncRNA	1.880510616	66.15143835	-5.13657617	0	down	ssc:102167025	uncharacterized LOC102167025
LOC102167020	1144	ncRNA	2.52378987	243.1550806	-6.590141129	0	down	ssc:102167020	uncharacterized LOC102167020
LOC102158559	1037	ncRNA	0	21.01035788	-20	1.85E-12	down	ssc:102158559	uncharacterized LOC102158559
LOC100157447	12258	pseudo	1.445227204	38.2721685	-4.726927424	0	down		uncharacterized LOC100157447
LOC102161713	3834	ncRNA	0.204061702	392.9193774	-10.91101216	0	down	ssc:102161713	uncharacterized LOC102161713
LOC102159884	1915	ncRNA	1.820861488	256.1986748	-7.136498022	0	down	ssc:102159884	uncharacterized LOC102159884
LOC102158553	1484	ncRNA	4.473170131	31.11558414	-2.798267795	2.12E-05	down	ssc:102158553	uncharacterized LOC102158553
LOC102159883	5213	ncRNA	0.068518886	49.32847488	-9.491703263	0	down	ssc:102159883	uncharacterized LOC102159883
LOC102157690	7151	ncRNA	0.870016091	244.911937	-8.137005292	0	down	ssc:102157690	uncharacterized LOC102157690
LOC102157692	4078	ncRNA	0	13.85377353	-20	8.23E-05	down	ssc:102157692	uncharacterized LOC102157692
LOC102161711	2594	ncRNA	1.096302183	364.3561517	-8.376560023	0	down	ssc:102161711	uncharacterized LOC102161711
LOC102160865	2049	ncRNA	0.339604517	172.1601787	-8.985680116	0	down	ssc:102160865	uncharacterized LOC102160865
LOC100511854	2222	ncRNA	27.71790663	1430.572738	-5.689630741	0	down	ssc:100511854	uncharacterized LOC100511854
LOC102167011	2777	ncRNA	7.439968972	186.1020152	-4.644653263	0	down	ssc:102167011	uncharacterized LOC102167011
LOC100512700	5551	ncRNA	109.420909	257.8116949	-1.236429264	0.013794315	down	ssc:100512700	uncharacterized LOC100512700
LOC102167016	3751	ncRNA	0.128168014	41.27951906	-8.331246087	0	down	ssc:102167016	uncharacterized LOC102167016
LOC102167015	27936	ncRNA	0.725603517	237.0802031	-8.351978034	0	down	ssc:102167015	uncharacterized LOC102167015
LOC100524718	1107	pseudo	0.119298255	99.93826603	-9.710320432	0	down		spermine synthase-like
LOC100626679	872	pseudo	315.0433408	99.03268512	1.669573654	6.66E-16	up		40S ribosomal protein SA-like
LOC102158548	1508	ncRNA	2.786456487	26.27799144	-3.237351478	2.84E-07	down	ssc:102158548	uncharacterized LOC102158548
LOC100521687	1645	pseudo	0.777777857	279.2975929	-8.488229262	0	down		40S ribosomal protein S20-like
LOC102167490	5271	ncRNA	1.406307509	171.0681978	-6.926515678	0	down	ssc:102167490	uncharacterized LOC102167490
LOC102158545	7368	ncRNA	0.400748602	228.1506176	-9.153073355	0	down	ssc:102158545	uncharacterized LOC102158545
LOC102161702	53687	ncRNA	0.332229716	110.6349819	-8.379410792	0	down	ssc:102161702	uncharacterized LOC102161702
LOC102158541	3334	ncRNA	0	56.6538466	-20	0	down	ssc:102158541	uncharacterized LOC102158541
LOC102161707	13981	ncRNA	3.137820692	28.28435953	-3.172169685	8.11E-04	down	ssc:102161707	uncharacterized LOC102161707
LOC100737295	453	pseudo	0.126673057	34.11999927	-8.07336411	0	down		60S ribosomal protein L28-like
LOC102166158	87222	ncRNA	1.60643507	14.13997819	-3.13784532	0.001344674	down	ssc:102166158	uncharacterized LOC102166158
LOC100625338	6234	ncRNA	238.9495223	42.42874087	2.493592113	0.008087304	up	ssc:100625338	uncharacterized LOC100625338
LOC102167489	12418	ncRNA	0.187817142	87.76796303	-8.868221873	0	down	ssc:102167489	uncharacterized LOC102167489
LOC102167004	1085	ncRNA	0.205556659	25.53239159	-6.956648758	0	down	ssc:102167004	uncharacterized LOC102167004
LOC102158538	5664	ncRNA	1.260399977	272.0676227	-7.753939836	0	down	ssc:102158538	uncharacterized LOC102158538
LOC102166151	6231	ncRNA	11.91508481	0.945209254	3.656011655	0.033556412	up	ssc:102166151	uncharacterized LOC102166151
LOC102158539	6922	ncRNA	9.245330153	104.9989516	-3.505506273	0	down	ssc:102158539	uncharacterized LOC102158539
LOC102157686	5051	ncRNA	0	157.7002384	-20	0	down	ssc:102157686	uncharacterized LOC102157686
LOC102157682	3681	ncRNA	0.256336028	18.17619783	-6.147870367	2.87E-12	down	ssc:102157682	uncharacterized LOC102157682
LOC102159861	4110	ncRNA	256.9542392	60.46697337	2.087292181	0.032662253	up	ssc:102159861	uncharacterized LOC102159861
LOC100517180	553	pseudo	0	33.92038987	-20	0	down		ribosomal protein L17 pseudogene
LOC102160841	8408	ncRNA	0.119298255	20.8401028	-7.448645638	3.24E-10	down	ssc:102160841	uncharacterized LOC102160841
LOC102165296	12816	ncRNA	313.9256222	84.11041418	1.90006644	0.029150308	up	ssc:102165296	uncharacterized LOC102165296
LOC100627509	515	pseudo	0.059649128	10.8493584	-7.506892972	3.00E-07	down		ribosomal protein L17 pseudogene
LOC102167473	6936	ncRNA	0.059649128	29.68749625	-8.959138671	0	down	ssc:102167473	uncharacterized LOC102167473
LOC102166142	2202	ncRNA	0.068518886	120.5420665	-10.78074738	0	down	ssc:102166142	uncharacterized LOC102166142
LOC102167472	5927	ncRNA	1.411243127	27.05294561	-4.260747228	4.27E-08	down	ssc:102167472	uncharacterized LOC102167472
LOC100627507	39595	pseudo	0.390383886	16.40319662	-5.392939677	3.47E-04	down		NEDD8-conjugating enzyme UBE2F-like
LOC102167477	1106	ncRNA	35.2600641	117.6565364	-1.738474469	8.24E-09	down	ssc:102167477	uncharacterized LOC102167477
LOC100521666	2643	ncRNA	1.333203764	16.77306111	-3.653176807	1.29E-05	down	ssc:100521666	uncharacterized LOC100521666
LOC100520332	858	ncRNA	0.137037773	52.12887745	-8.571365372	0	down	ssc:100520332	uncharacterized LOC100520332
LOC102158523	7195	ncRNA	1.140157496	31.20364712	-4.774409632	2.11E-12	down	ssc:102158523	uncharacterized LOC102158523
LOC102158522	20114	ncRNA	3.292247224	3259.373584	-9.95130633	0	down	ssc:102158522	uncharacterized LOC102158522
LOC102159854	2826	ncRNA	0.137037773	13.28136419	-6.59868592	0.005985192	down	ssc:102159854	uncharacterized LOC102159854
LOC102157672	2157	ncRNA	32.94026255	2296.570815	-6.123485406	0	down	ssc:102157672	uncharacterized LOC102157672
LOC102160838	856	ncRNA	0	18.66494734	-20	3.34E-11	down	ssc:102160838	uncharacterized LOC102160838
LOC100739490	3787	ncRNA	75.50964004	468.6711476	-2.633843237	0	down	ssc:100739490	uncharacterized LOC100739490
LOC102160839	4398	ncRNA	12.57226942	156.5598229	-3.638397029	0	down	ssc:102160839	uncharacterized LOC102160839
LOC102159850	13043	ncRNA	0.128168014	55.13035715	-8.748666872	0	down	ssc:102159850	uncharacterized LOC102159850
LOC102164237	981	ncRNA	0	24.13219031	-20	2.22E-16	down	ssc:102164237	uncharacterized LOC102164237
LOC102164238	4417	ncRNA	393.1021882	69.27914164	2.504411434	0.020583521	up	ssc:102164238	uncharacterized LOC102164238
LOC102166899	6505	ncRNA	0	21.21290272	-20	9.34E-14	down	ssc:102166899	uncharacterized LOC102166899
LOC102162059	4042	ncRNA	0.536291418	23.47465343	-5.451942882	5.74E-10	down	ssc:102162059	uncharacterized LOC102162059
LOC102164239	1608	ncRNA	1.21101558	74.85793104	-5.949865844	0	down	ssc:102164239	uncharacterized LOC102164239
LOC102166892	49988	ncRNA	0.461892688	219.9959862	-8.89570378	0	down	ssc:102166892	uncharacterized LOC102166892
LOC102166895	4264	ncRNA	0	17.06220121	-20	6.18E-10	down	ssc:102166895	uncharacterized LOC102166895
LOC102162056	12474	ncRNA	3.173950445	89.88000669	-4.823648723	0	down	ssc:102162056	uncharacterized LOC102162056
LOC102164231	15257	ncRNA	9.084222274	200.7865161	-4.466155571	0	down	ssc:102164231	uncharacterized LOC102164231
LOC102162055	1252	ncRNA	0.137037773	41.76533313	-8.251588525	0	down	ssc:102162055	uncharacterized LOC102162055
LOC102167740	4210	ncRNA	1.224920942	71.62014903	-5.869604976	0	down	ssc:102167740	uncharacterized LOC102167740
LOC100156311	2177	ncRNA	3.710635357	653.3318655	-7.460005962	0	down	ssc:100156311	uncharacterized LOC100156311
LOC100623379	6958	pseudo	0.059649128	20.92523034	-8.454526748	3.52E-11	down		C-type lectin domain family 9 member A-like
LOC100621191	7404	ncRNA	81.30034753	19.15369684	2.085638647	0.027830647	up	ssc:100621191	uncharacterized LOC100621191
LOC102157941	3794	ncRNA	0.187817142	20.46877059	-6.7679519	7.77E-16	down	ssc:102157941	uncharacterized LOC102157941
LOC102163377	3031	ncRNA	0.068518886	1.890418508	-4.786060144	0.048049116	down	ssc:102163377	uncharacterized LOC102163377
LOC102167735	20847	ncRNA	1.007504609	120.5772917	-6.903027981	0	down	ssc:102167735	uncharacterized LOC102167735
LOC102166403	479	pseudo	0	10.85229383	-20	6.71E-05	down		intraflagellar transport 20 homolog (Chlamydomonas) pseudogene
LOC102164225	14992	ncRNA	0.324854915	161.1258881	-8.954177063	0	down	ssc:102164225	uncharacterized LOC102164225
LOC102164228	1448	ncRNA	0.441163255	21.5005751	-5.606918807	2.38E-09	down	ssc:102164228	uncharacterized LOC102164228
LOC102163370	1072	ncRNA	5.030090995	21.46828534	-2.093550565	0.012679241	down	ssc:102163370	uncharacterized LOC102163370
LOC102162041	80237	ncRNA	0.178947383	8.473125814	-5.56528694	3.22E-05	down	ssc:102162041	uncharacterized LOC102162041
LOC102161195	3333	ncRNA	2.1993857	155.5221475	-6.143875607	0	down	ssc:102161195	uncharacterized LOC102161195
LOC102167732	6876	ncRNA	0.262215872	23.38952589	-6.478963793	2.57E-12	down	ssc:102167732	uncharacterized LOC102167732
LOC102157929	2709	ncRNA	0.126673057	15.54311491	-6.939022149	2.38E-05	down	ssc:102157929	uncharacterized LOC102157929
LOC102166884	3820	ncRNA	0.315985156	42.0515378	-7.056157963	0	down	ssc:102166884	uncharacterized LOC102166884
LOC102162042	33420	ncRNA	11.63796209	183.0344883	-3.975205157	0	down	ssc:102162042	uncharacterized LOC102162042
LOC102164220	3171	ncRNA	0.068518886	11.2206906	-7.355444052	1.01E-07	down	ssc:102164220	uncharacterized LOC102164220
LOC102167730	7836	ncRNA	0.137037773	106.0615782	-9.596112795	0	down	ssc:102167730	uncharacterized LOC102167730
LOC102162045	10235	ncRNA	0.068518886	44.9722931	-9.358319027	0	down	ssc:102162045	uncharacterized LOC102162045
LOC102166882	2365	ncRNA	0.383009085	65.49830462	-7.417935141	0	down	ssc:102166882	uncharacterized LOC102166882
LOC102164221	18759	pseudo	1.20075085	268.8812108	-7.806888304	0	down		serine/arginine repetitive matrix protein 1-like
LOC102161198	22309	ncRNA	6.718542305	2780.428423	-8.692943231	0	down	ssc:102161198	uncharacterized LOC102161198
LOC102157936	48781	ncRNA	0.24746627	19.60722116	-6.308009379	1.10E-10	down	ssc:102157936	uncharacterized LOC102157936
LOC100622030	24697	ncRNA	0.178947383	75.97486309	-8.729842914	0	down	ssc:100622030	uncharacterized LOC100622030
LOC102164215	545	ncRNA	1.412187353	242.2641769	-7.42250578	0	down	ssc:102164215	uncharacterized LOC102164215
LOC102163367	1887	pseudo	1.856440509	154.748661	-6.381244032	0	down		tyrosylprotein sulfotransferase 2 pseudogene
LOC102166875	15229	ncRNA	6.486784378	18.49762769	-1.511764868	0.026789906	down	ssc:102166875	uncharacterized LOC102166875
LOC102167727	11439	ncRNA	57.32434295	339.3433317	-2.565525845	0	down	ssc:102167727	uncharacterized LOC102167727
LOC102161181	2121	pseudo	0.137037773	22.44431664	-7.35563275	1.08E-12	down		60S ribosomal protein L11-like
LOC100625537	652	pseudo	0.196686901	35.0358542	-7.476787384	0	down		60S ribosomal protein L10a-like
LOC102161185	23914	ncRNA	4.662031485	167.5221954	-5.167249696	0	down	ssc:102161185	uncharacterized LOC102161185
LOC102161186	1609	ncRNA	0.059649128	52.49727423	-9.781525761	0	down	ssc:102161186	uncharacterized LOC102161186
LOC102164693	36521	ncRNA	2.427617495	42.59312509	-4.133007558	0	down	ssc:102164693	uncharacterized LOC102164693
LOC102166871	1883	ncRNA	0.98921436	57.02371109	-5.849134939	0	down	ssc:102166871	uncharacterized LOC102166871
LOC100513741	14404	pseudo	123.73853	36.41844289	1.764553655	0.005970413	up	ssc:100513741	zinc finger protein 211-like
LOC100626862	7230	ncRNA	0.40224356	27.62535494	-6.101779868	1.50E-14	down	ssc:100626862	uncharacterized LOC100626862
LOC102157921	54571	ncRNA	0.439668298	32.52018858	-6.208776303	0	down	ssc:102157921	uncharacterized LOC102157921
LOC102165536	2453	ncRNA	0.187817142	27.71048248	-7.204959278	2.22E-16	down	ssc:102165536	uncharacterized LOC102165536
LOC102164202	41452	ncRNA	0.324854915	60.43615133	-7.539472448	0	down	ssc:102164202	uncharacterized LOC102164202
LOC102165534	11879	ncRNA	0.137037773	28.65569174	-7.708104302	0	down	ssc:102165534	uncharacterized LOC102165534
LOC102164680	70194	ncRNA	48.71863449	9075.784777	-7.54140489	0	down	ssc:102164680	uncharacterized LOC102164680
LOC102164681	5879	ncRNA	3.580578891	104.2239974	-4.86335083	0	down	ssc:102164681	uncharacterized LOC102164681
LOC102161172	4206	ncRNA	0.059649128	64.38137257	-10.07592658	0	down	ssc:102161172	uncharacterized LOC102161172
LOC102163353	1033	ncRNA	0.067023929	26.39394102	-8.621314808	0	down	ssc:102163353	uncharacterized LOC102163353
LOC102165530	3802	ncRNA	0.238596511	9.617944476	-5.333083747	9.77E-06	down	ssc:102165530	uncharacterized LOC102165530
LOC102161176	9083	ncRNA	0.128168014	75.43474352	-9.201049074	0	down	ssc:102161176	uncharacterized LOC102161176
LOC102157915	3124	ncRNA	0.137037773	441.4919784	-11.6535979	0	down	ssc:102157915	uncharacterized LOC102157915
LOC100623346	11056	pseudo	0.366764525	20.92669805	-5.83434678	1.01E-08	down		serine protease inhibitor A3K-like
LOC102157911	15335	ncRNA	0.520046858	101.3032421	-7.605823011	0	down	ssc:102157911	uncharacterized LOC102157911
LOC100623342	5362	ncRNA	16.19027305	84.53018102	-2.384339222	5.11E-15	down	ssc:100623342	uncharacterized LOC100623342
LOC100622494	28377	pseudo	0.205556659	26.02260881	-6.984085681	1.67E-15	down		uncharacterized LOC100622494
LOC102167709	1306	ncRNA	0.205556659	24.50352251	-6.897309238	4.71E-13	down	ssc:102167709	uncharacterized LOC102167709
LOC100523528	42818	pseudo	129.1939122	60.63135759	1.091402059	8.45E-07	up	ssc:100523528	protein CASC4-like
LOC102165128	6656	ncRNA	0.265205787	17.71827037	-6.06198171	3.03E-12	down	ssc:102165128	uncharacterized LOC102165128
LOC102166458	22271	pseudo	5.374180385	587.227394	-6.771730715	0	down		homeobox protein NANOG-like
LOC102167309	20399	ncRNA	3.463269074	2317.695655	-9.386340938	0	down	ssc:102167309	uncharacterized LOC102167309
LOC102162093	8215	pseudo	0	16.0303967	-20	2.34E-07	down		protein slowmo homolog 2-like
LOC102167781	3455	ncRNA	0.390383886	26.96635035	-6.110122965	2.31E-13	down	ssc:102167781	uncharacterized LOC102167781
LOC100152387	140931	ncRNA	0.383009085	82.92449946	-7.758275976	0	down	ssc:100152387	uncharacterized LOC100152387
LOC102165124	1506	pseudo	0.272580588	152.2021734	-9.12509042	0	down		dnaJ homolog subfamily A member 1-like
LOC100155410	3471	pseudo	0.068518886	39.38322969	-9.166864006	0	down		N-acetyllactosaminide alpha-1,3-galactosyltransferase-like
LOC102167787	16150	ncRNA	3.151175323	201.5262451	-5.998933901	0	down	ssc:102167787	uncharacterized LOC102167787
LOC102165125	6740	ncRNA	0.135542815	277.6346704	-11.00022338	0	down	ssc:102165125	uncharacterized LOC102165125
LOC102165122	3577	ncRNA	1.077067708	144.5377592	-7.068193677	0	down	ssc:102165122	uncharacterized LOC102165122
LOC102162099	1573	ncRNA	0	52.95520169	-20	0	down	ssc:102162099	uncharacterized LOC102162099
LOC102157507	7642	ncRNA	0	51.55500041	-20	0	down	ssc:102157507	uncharacterized LOC102157507
LOC102158838	82212	pseudo	0.196686901	20.43648083	-6.699102098	3.98E-13	down		40S ribosomal protein S20-like
LOC102158837	844	ncRNA	0.46039773	79.66910485	-7.434995834	0	down	ssc:102158837	uncharacterized LOC102158837
LOC102162092	89269	ncRNA	3.865569884	128.9256616	-5.059714519	0	down	ssc:102162092	uncharacterized LOC102162092
LOC102157501	6691	ncRNA	0.137037773	44.31475623	-8.337069756	0	down	ssc:102157501	uncharacterized LOC102157501
LOC100519064	651	pseudo	0.068518886	16.40319662	-7.903259571	1.88E-07	down		60S ribosomal protein L10a-like
LOC100523580	2572	pseudo	0.137037773	70.1348202	-8.999413464	0	down		ras-related protein Rab-3C-like
LOC102165118	2944	pseudo	0.409618361	59.97528844	-7.193943995	0	down		porimin-like
LOC102165119	2675	ncRNA	11.07028302	33.26578843	-1.587347121	8.30E-04	down	ssc:102165119	uncharacterized LOC102165119
LOC102165592	18754	ncRNA	0	28.36801936	-20	0	down	ssc:102165592	uncharacterized LOC102165592
LOC102165113	2961	ncRNA	0.383009085	28.08328241	-6.196189146	9.99E-16	down	ssc:102165113	uncharacterized LOC102165113
LOC100522251	5985	ncRNA	145.0080785	1745.544642	-3.589472073	0	down	ssc:100522251	uncharacterized LOC100522251
LOC100513759	449	pseudo	0	11.50689527	-20	0.027288939	down		CDGSH iron-sulfur domain-containing protein 1-like
LOC102166442	3978	pseudo	0.442658213	111.9852809	-7.982900216	0	down		protein RUFY3-like
LOC100625986	10481	pseudo	0.186322184	18.951152	-6.668342281	3.18E-08	down		coiled-coil domain-containing protein 132-like
LOC102158824	4052	ncRNA	0.187817142	46.91848483	-7.964683872	0	down	ssc:102158824	uncharacterized LOC102158824
LOC102162080	656	pseudo	0.391878844	110.4705977	-8.139039037	0	down		ubiquitin-conjugating enzyme E2 E3-like
LOC102157973	8336	ncRNA	0.375634284	94.06446567	-7.968177273	0	down	ssc:102157973	uncharacterized LOC102157973
LOC102165107	7397	ncRNA	0.137037773	22.44284892	-7.355538404	0	down	ssc:102165107	uncharacterized LOC102165107
LOC102165108	4635	ncRNA	0.375634284	58.96696738	-7.294434447	0	down	ssc:102165108	uncharacterized LOC102165108
LOC100737572	9507	ncRNA	0.26371083	39.96004216	-7.243457477	0	down	ssc:100737572	uncharacterized LOC100737572
LOC102162074	4759	ncRNA	5.08260803	1333.260217	-8.035173693	0	down	ssc:102162074	uncharacterized LOC102162074
LOC102165102	9944	ncRNA	4.069080855	412.5926457	-6.663871348	0	down	ssc:102165102	uncharacterized LOC102165102
LOC100623791	760	pseudo	0	19.69381642	-20	3.49E-11	down		protein tyrosine phosphatase type IVA 1-like
LOC102162070	22032	ncRNA	0.204061702	32.80492553	-7.328763192	0	down	ssc:102162070	uncharacterized LOC102162070
LOC102165577	15660	ncRNA	0.059649128	45.51241268	-9.575543312	0	down	ssc:102165577	uncharacterized LOC102165577
LOC102165578	458	pseudo	0.453022929	174.5085247	-8.589497727	0	down		diazepam binding inhibitor (GABA receptor modulator, acyl-CoA binding protein) pseudogene
LOC100525743	305	pseudo	0	27.13660544	-20	0	down		high mobility group nucleosome binding domain 1 pseudogene
LOC102166429	1804	ncRNA	1.882949799	400.7628529	-7.733610442	0	down	ssc:102166429	uncharacterized LOC102166429
LOC100737100	3035	ncRNA	41.52956116	0.945209254	5.457361062	0.018511649	up	ssc:100737100	uncharacterized LOC100737100
LOC102162061	2315	ncRNA	0.068518886	62.03155888	-9.82228496	0	down	ssc:102162061	uncharacterized LOC102162061
LOC100155447	3249	pseudo	0.178947383	25.73640415	-7.16813124	1.67E-15	down		DNA endonuclease RBBP8-like
LOC100516803	610	pseudo	0.274075546	73.91272179	-8.07510528	0	down		TBP-related factor 10 pseudogene
LOC102167753	1163	ncRNA	0.195191943	40.53538693	-7.6981446	0	down	ssc:102167753	uncharacterized LOC102167753
LOC100157610	13711	ncRNA	0.26371083	16.77452883	-5.991171616	3.27E-05	down	ssc:100157610	uncharacterized LOC100157610
LOC102157957	4360	ncRNA	0.068518886	38.35729604	-9.128783602	0	down	ssc:102157957	uncharacterized LOC102157957
LOC102163390	12272	ncRNA	0.196686901	36.09701304	-7.519834775	0	down	ssc:102163390	uncharacterized LOC102163390
LOC102157956	331	pseudo	0.137037773	30.83084719	-7.813657113	0	down		small EDRK-rich factor 2 pseudogene
LOC100511112	14834	ncRNA	123.5668703	34.61461964	1.835838592	0.039061686	up	ssc:100511112	uncharacterized LOC100511112
LOC102157951	28444	ncRNA	1.819917262	42.88226519	-4.558436347	0	down	ssc:102157951	uncharacterized LOC102157951
LOC102157950	1181	pseudo	0.187817142	78.06635873	-8.699228427	0	down		ribosomal protein L4 pseudogene
LOC102159286	571	pseudo	0.196686901	22.52650875	-6.839579049	1.32E-12	down		C1D nuclear receptor corepressor pseudogene
LOC102161122	601	pseudo	0	24.58718234	-20	5.22E-15	down		60S ribosomal protein L15-like
LOC102165964	3850	ncRNA	26.90728245	83.79191975	-1.638814438	1.48E-04	down	ssc:102165964	uncharacterized LOC102165964
LOC102163785	5941	ncRNA	0.128168014	11.79603537	-6.524121978	0.005424365	down	ssc:102163785	uncharacterized LOC102163785
LOC102164634	1365	ncRNA	0.186322184	594.2562871	-11.63907009	0	down	ssc:102164634	uncharacterized LOC102164634
LOC102165965	1658	ncRNA	29.69599911	6.124779841	2.277538681	0.029450237	up	ssc:102165965	uncharacterized LOC102165965
LOC102159285	1394	ncRNA	0.451527971	91.6353953	-7.664945792	0	down	ssc:102159285	uncharacterized LOC102159285
LOC102159282	1127	ncRNA	0	129.6727292	-20	0	down	ssc:102159282	uncharacterized LOC102159282
LOC102165961	2171	ncRNA	0.590060702	48.01193342	-6.346385846	0	down	ssc:102165961	uncharacterized LOC102165961
LOC102160273	1017	ncRNA	0.059649128	8.471658098	-7.149999515	6.71E-06	down	ssc:102160273	uncharacterized LOC102160273
LOC102163783	12574	ncRNA	0.059649128	11.59349053	-7.602598238	0.015594283	down	ssc:102163783	uncharacterized LOC102163783
LOC102161121	2275	pseudo	0.46039773	22.9829685	-5.641540619	5.52E-10	down	ssc:102161121	suppression of tumorigenicity 13 (colon carcinoma) (Hsp70 interacting protein) pseudogene
LOC102160274	5822	ncRNA	5.824864116	105.4069767	-4.177602155	0	down	ssc:102160274	uncharacterized LOC102160274
LOC102166809	3527	ncRNA	0.785252645	56.19445142	-6.16112698	0	down	ssc:102166809	uncharacterized LOC102166809
LOC102166808	2247	ncRNA	0.068518886	29.51724117	-8.750840465	0	down	ssc:102166808	uncharacterized LOC102166808
LOC102164629	4482	ncRNA	0.383009085	42.02218347	-6.777628703	0	down	ssc:102164629	uncharacterized LOC102164629
LOC102165953	4972	ncRNA	0.274075546	74.03013909	-8.077395318	0	down	ssc:102165953	uncharacterized LOC102165953
LOC102160264	11396	ncRNA	0.119298255	55.13182487	-8.8521686	0	down	ssc:102160264	uncharacterized LOC102160264
LOC102161115	3905	ncRNA	15.07809722	1842.261271	-6.93287949	0	down	ssc:102161115	uncharacterized LOC102161115
LOC102166805	12055	ncRNA	23.46832619	5.095910762	2.203303031	0.041937801	up	ssc:102166805	uncharacterized LOC102166805
LOC102160269	1747	ncRNA	0.536291418	53.07261899	-6.628806767	0	down	ssc:102160269	uncharacterized LOC102160269
LOC102161117	6349	ncRNA	2.644483097	486.5464636	-7.52344802	0	down	ssc:102161117	uncharacterized LOC102161117
LOC102159270	1054	ncRNA	0.068518886	108.9016091	-10.63423594	0	down	ssc:102159270	uncharacterized LOC102159270
LOC102166802	73250	ncRNA	2.112576565	165.367588	-6.290529055	0	down	ssc:102166802	uncharacterized LOC102166802
LOC100515977	413	pseudo	0.059649128	44.28246647	-9.536018825	0	down		general transcription factor IIA, 2, 12kDa pseudogene
LOC100515976	104289	pseudo	13.14797402	194.1612451	-3.884342849	0	down	ssc:100515976	Uncharacterized protein
LOC102161592	10814	ncRNA	1.893314516	342.0894288	-7.497315622	0	down	ssc:102161592	uncharacterized LOC102161592
LOC100155850	279	pseudo	0.137037773	40.0803949	-8.192179302	0	down		small ubiquitin-related modifier 1-like
LOC100513313	13430	ncRNA	2.193505857	94.69411593	-5.431964319	0	down	ssc:100513313	uncharacterized LOC100513313
LOC102161109	17890	ncRNA	20.19279443	2049.947521	-6.665602591	0	down	ssc:102161109	uncharacterized LOC102161109
LOC102164617	45086	ncRNA	0.324854915	92.12414481	-8.14763998	0	down	ssc:102164617	uncharacterized LOC102164617
LOC102161100	584	ncRNA	0.537786375	72.27915362	-7.070402597	0	down	ssc:102161100	uncharacterized LOC102161100
LOC102165942	21633	ncRNA	0.50230734	44.94000334	-6.483286064	0	down	ssc:102165942	uncharacterized LOC102165942
LOC102161101	1386	ncRNA	0.068518886	19.03481183	-8.117922887	1.33E-15	down	ssc:102161101	uncharacterized LOC102161101
LOC102161586	1378	pseudo	0.196686901	166.2907815	-9.723591601	0	down		N-chimaerin-like
LOC102162434	13301	ncRNA	0.068518886	23.10332123	-8.397382841	5.66E-15	down	ssc:102162434	uncharacterized LOC102162434
LOC102164615	2686	ncRNA	1.075572751	131.3121682	-6.931751691	0	down	ssc:102164615	uncharacterized LOC102164615
LOC102162436	3173	ncRNA	0.324854915	36.0118855	-6.792533795	0	down	ssc:102162436	uncharacterized LOC102162436
LOC102164616	743	ncRNA	0.059649128	31.37096677	-9.038713234	0	down	ssc:102164616	uncharacterized LOC102164616
LOC102163766	3092	ncRNA	0.128168014	27.13807315	-7.726138215	0	down	ssc:102163766	uncharacterized LOC102163766
LOC102161589	7756	ncRNA	4.62999311	138.6639588	-4.904438998	0	down	ssc:102161589	uncharacterized LOC102161589
LOC102163769	746	ncRNA	0.178947383	5.55237051	-4.955496491	0.003510304	down	ssc:102163769	uncharacterized LOC102163769
LOC102165944	2554	ncRNA	0.068518886	51.64306338	-9.557857161	0	down	ssc:102165944	uncharacterized LOC102165944
LOC102161107	5950	ncRNA	0	78.31880592	-20	0	down	ssc:102161107	uncharacterized LOC102161107
LOC102163768	6579	ncRNA	0.196686901	16.68940129	-6.406887513	7.79E-06	down	ssc:102163768	uncharacterized LOC102163768
LOC100522267	16445	pseudo	1.149027255	18.17619783	-3.983565519	1.06E-07	down		multidrug resistance protein 1-like
LOC100737533	1567	pseudo	0.478137248	12.53723206	-4.71265026	2.17E-06	down		phospholipid transfer protein-like
LOC100736686	15043	pseudo	0.187817142	71.44989395	-8.571459318	0	down		transformer-2 protein homolog alpha-like
LOC100738867	15806	ncRNA	3.192634188	432.7620022	-7.082682763	0	down	ssc:100738867	uncharacterized LOC100738867
LOC100736687	63576	ncRNA	4.538699102	39.01776834	-3.103780512	5.21E-07	down	ssc:100736687	uncharacterized LOC100736687
LOC100622425	479	pseudo	0.204061702	33.75013478	-7.36974401	0	down		ribosomal protein S23 pseudogene
LOC102161583	1221	ncRNA	0.204061702	13.7701137	-6.076391218	0.001709667	down	ssc:102161583	uncharacterized LOC102161583
LOC100513340	1097	pseudo	0.202566744	92.33843138	-8.83239007	0	down		mitochondrial ribosomal protein L15 pseudogene
LOC100514675	6680	ncRNA	55.80278583	23.38805818	1.254565062	0.015272826	up	ssc:100514675	Uncharacterized protein
LOC102165938	2974	ncRNA	0.265205787	120.9412853	-8.832978845	0	down	ssc:102165938	uncharacterized LOC102165938
LOC100155408	789	pseudo	0.205556659	14.42765057	-6.133156466	0.001776875	down		ribosomal protein L27a pseudogene
LOC102165935	2204	ncRNA	0.195191943	17.26327833	-6.466669147	4.89E-07	down	ssc:102165935	uncharacterized LOC102165935
LOC102159250	2846	ncRNA	0.128168014	17.34693816	-7.080500965	1.51E-06	down	ssc:102159250	uncharacterized LOC102159250
LOC102161578	22748	ncRNA	0	19.03627954	-20	3.39E-11	down	ssc:102161578	uncharacterized LOC102161578
LOC100516844	417	pseudo	0.272580588	5.55237051	-4.348349112	0.006597527	down		ribosomal protein L31 pseudogene
LOC100156723	666	pseudo	0	32.31617602	-20	0	down		olfactory receptor 6C2-like
LOC102162417	2905	ncRNA	0.059649128	15.00152762	-7.974392664	3.06E-13	down	ssc:102162417	uncharacterized LOC102162417
LOC102161167	388	pseudo	0.068518886	3.205492253	-5.547900406	0.045652584	down		NADH dehydrogenase (ubiquinone) 1 alpha subcomplex, 1, 7.5kDa pseudogene
LOC102164678	2742	ncRNA	0.5185519	35.80787294	-6.109644621	0	down	ssc:102164678	uncharacterized LOC102164678
LOC102161169	7835	ncRNA	0.655589673	382.5015275	-9.188456665	0	down	ssc:102161169	uncharacterized LOC102161169
LOC102165527	13101	ncRNA	0.333724674	37.89936857	-6.827371648	0	down	ssc:102165527	uncharacterized LOC102165527
LOC100152300	3034	pseudo	0.453022929	277.0681319	-9.256440996	0	down		elongation factor 1-alpha 1-like
LOC102161160	1420	ncRNA	0.391878844	37.04222229	-6.562619155	0	down	ssc:102161160	uncharacterized LOC102161160
LOC100737510	6420	pseudo	0.137037773	43.3357895	-8.304841567	0	down		UPF0184 protein C9orf16-like
LOC102162496	115873	ncRNA	1.047468517	471.1956195	-8.813275435	0	down	ssc:102162496	uncharacterized LOC102162496
LOC102157906	352	pseudo	0.204061702	71.7346309	-8.457520514	0	down		ribosomal protein L35a pseudogene
LOC100514214	2369	pseudo	0.903055943	12.82343673	-3.827823788	6.87E-04	down	ssc:100514214	olfactory receptor 7G1-like
LOC102157900	6296	ncRNA	0.068518886	73.42544	-10.06556259	0	down	ssc:102157900	uncharacterized LOC102157900
LOC100155826	405	pseudo	0.068518886	75.685723	-10.10930376	0	down		NADH dehydrogenase [ubiquinone] 1 beta subcomplex subunit 6-like
LOC102166845	1689	ncRNA	0	14.22657345	-20	4.22E-06	down	ssc:102166845	uncharacterized LOC102166845
LOC102162007	25177	ncRNA	1.288504211	402.1395707	-8.285855242	0	down	ssc:102162007	uncharacterized LOC102162007
LOC102165515	2411	ncRNA	189.0684914	38.22666929	2.306257548	0.025025384	up	ssc:102165515	uncharacterized LOC102165515
LOC102161150	1172	ncRNA	0.137037773	13.11257683	-6.580233805	3.54E-04	down	ssc:102161150	uncharacterized LOC102161150
LOC102166841	5327	ncRNA	0.639345113	113.9549561	-7.477653059	0	down	ssc:102166841	uncharacterized LOC102166841
LOC102162483	11811	ncRNA	0.461892688	62.97823585	-7.091151828	0	down	ssc:102162483	uncharacterized LOC102162483
LOC102162001	709	ncRNA	1.228855084	198.2400285	-7.333789698	0	down	ssc:102162001	uncharacterized LOC102162001
LOC100623724	972	pseudo	0	28.28582725	-20	0	down		zinc finger protein 260-like
LOC102161154	15957	ncRNA	43.96784333	1.890418508	4.539671204	0.010709425	up	ssc:102161154	uncharacterized LOC102161154
LOC100515534	38691	ncRNA	9.733345087	249.028881	-4.677233552	0	down	ssc:100515534	uncharacterized LOC100515534
LOC102166839	1284	ncRNA	0.068518886	30.17037489	-8.782415202	0	down	ssc:102166839	uncharacterized LOC102166839
LOC102161144	1085	ncRNA	0.187817142	15.74419203	-6.38934717	1.20E-04	down	ssc:102161144	uncharacterized LOC102161144
LOC102160298	3209	ncRNA	1.244155417	94.18188297	-6.242210946	0	down	ssc:102160298	uncharacterized LOC102160298
LOC102165987	34301	ncRNA	1.811440998	11.2206906	-2.630951752	0.029276148	down	ssc:102165987	uncharacterized LOC102165987
LOC102165984	1232	ncRNA	0.272580588	209.5429112	-9.586347176	0	down	ssc:102165984	uncharacterized LOC102165984
LOC102166832	2802	ncRNA	0.342594432	60.43468362	-7.462731238	0	down	ssc:102166832	uncharacterized LOC102166832
LOC102163325	9355	ncRNA	7.745632148	318.5208415	-5.361860977	0	down	ssc:102163325	uncharacterized LOC102163325
LOC102162477	7019	ncRNA	0.187817142	43.40330445	-7.852332332	0	down	ssc:102162477	uncharacterized LOC102162477
LOC102165501	20472	ncRNA	0.068518886	32.34846578	-8.882979869	0	down	ssc:102165501	uncharacterized LOC102165501
LOC102161147	24987	ncRNA	1.479211282	865.8146123	-9.193086206	0	down	ssc:102161147	uncharacterized LOC102161147
LOC102162479	2955	ncRNA	0.458902773	71.25028454	-7.278563442	0	down	ssc:102162479	uncharacterized LOC102162479
LOC102164657	998	ncRNA	1.702958204	97.6750476	-5.841875121	0	down	ssc:102164657	uncharacterized LOC102164657
LOC102165988	13625	ncRNA	1.059328191	202.4743898	-7.578446008	0	down	ssc:102165988	uncharacterized LOC102165988
LOC102165989	2202	ncRNA	0	40.7041743	-20	0	down	ssc:102165989	uncharacterized LOC102165989
LOC102165505	103249	ncRNA	1.327974638	40.61904675	-4.934856884	0	down	ssc:102165505	uncharacterized LOC102165505
LOC102161141	6866	ncRNA	0.068518886	16.68940129	-7.92821478	1.91E-07	down	ssc:102161141	uncharacterized LOC102161141
LOC100738824	13449	pseudo	0.256336028	22.03922696	-6.425893546	3.30E-13	down		uncharacterized LOC100738824
LOC100738821	32258	pseudo	0.785252645	131.7656926	-7.390602176	0	down		40S ribosomal protein S3-like
LOC102165975	13984	ncRNA	16.33218919	128.018613	-2.970563493	0	down	ssc:102165975	uncharacterized LOC102165975
LOC102163798	31347	ncRNA	1.412187353	207.0800833	-7.196113492	0	down	ssc:102163798	uncharacterized LOC102163798
LOC102161136	1323	ncRNA	0.408123404	26.96928578	-6.046168062	8.88E-16	down	ssc:102161136	uncharacterized LOC102161136
LOC102162466	1750	ncRNA	0.196686901	15.74272432	-6.322640537	2.78E-08	down	ssc:102162466	uncharacterized LOC102162466
LOC102164648	10488	ncRNA	0.137037773	263.4770796	-10.90888814	0	down	ssc:102164648	uncharacterized LOC102164648
LOC100153667	3816	pseudo	0.274075546	140.3503648	-9.000243488	0	down		alpha-N-acetyl-neuraminyl-2,3-beta-galactosyl-1,3-N-acetyl-galactosaminide alpha-2,6-sialyltransferase-like
LOC102161139	29606	ncRNA	0.511177099	95.09039932	-7.539332674	0	down	ssc:102161139	uncharacterized LOC102161139
LOC100737981	2912	ncRNA	1230.794841	580.7503623	1.083600247	8.28E-05	up	ssc:100737981	uncharacterized LOC100737981
LOC102163790	837	ncRNA	0.333724674	76.26693863	-7.836255626	0	down	ssc:102163790	uncharacterized LOC102163790
LOC100620675	23573	pseudo	0.195191943	19.23735667	-6.622873263	3.22E-08	down		enolase-phosphatase E1-like
LOC102160282	3425	ncRNA	0.374139326	36.38028227	-6.60343731	1.11E-16	down	ssc:102160282	uncharacterized LOC102160282
LOC102164640	6250	ncRNA	29.2171539	221.7954063	-2.924341931	0	down	ssc:102164640	uncharacterized LOC102164640
LOC102161130	872	pseudo	0.30562044	76.74981727	-7.972278472	0	down		60S ribosomal protein L6-like
LOC102162460	11670	ncRNA	1.698573318	126.1267268	-6.214406719	0	down	ssc:102162460	uncharacterized LOC102162460
LOC102163310	6269	ncRNA	0.314490198	8.958939887	-4.832241069	0.002419177	down	ssc:102163310	uncharacterized LOC102163310
LOC102161132	5007	ncRNA	2.578403394	1056.685238	-8.678851987	0	down	ssc:102161132	uncharacterized LOC102161132
LOC102162462	5221	ncRNA	0.539281333	91.51944572	-7.406896408	0	down	ssc:102162462	uncharacterized LOC102162462
LOC100737503	32081	pseudo	9.285294061	97.75723971	-3.396184044	0	down	ssc:100737503	thrombospondin-4-like
LOC102163309	7708	ncRNA	1.586649863	62.28840922	-5.294908029	0	down	ssc:102163309	uncharacterized LOC102163309
LOC102166818	3143	ncRNA	0.068518886	10.73340881	-7.291390912	2.90E-08	down	ssc:102166818	uncharacterized LOC102166818
LOC100523096	654	pseudo	0	16.68940129	-20	1.21E-08	down		60S ribosomal protein L10a-like
LOC102161641	27114	ncRNA	0.135542815	23.7608581	-7.453694485	6.27E-14	down	ssc:102161641	uncharacterized LOC102161641
LOC102160796	3176	ncRNA	0.068518886	147.6757365	-11.07364348	0	down	ssc:102160796	uncharacterized LOC102160796
LOC102162975	9991	ncRNA	0.944414822	197.6661514	-7.709429445	0	down	ssc:102162975	uncharacterized LOC102162975
LOC102160315	6027	ncRNA	0.205556659	52.95520169	-8.009092483	0	down	ssc:102160315	uncharacterized LOC102160315
LOC102160790	44863	ncRNA	0.606305262	117.2514467	-7.595345665	0	down	ssc:102160790	uncharacterized LOC102160790
LOC102166092	2875	ncRNA	0.205556659	61.1744126	-8.217248422	0	down	ssc:102166092	uncharacterized LOC102166092
LOC100514132	61832	pseudo	0.409618361	780.7721983	-10.89640558	0	down		ankyrin and armadillo repeat-containing protein-like
LOC102161636	1227	ncRNA	0.520046858	29.60236871	-5.830927191	0	down	ssc:102161636	uncharacterized LOC102161636
LOC102159327	6524	ncRNA	13.7308107	1.602746127	3.098798981	0.018067012	up	ssc:102159327	uncharacterized LOC102159327
LOC102158478	735	ncRNA	0.546656134	130.278896	-7.896754072	0	down	ssc:102158478	uncharacterized LOC102158478
LOC102160308	3022	ncRNA	0.935545063	73.05557551	-6.287043426	0	down	ssc:102160308	uncharacterized LOC102160308
LOC102163816	7873	ncRNA	9.833995884	197.4650743	-4.327675944	0	down	ssc:102163816	uncharacterized LOC102163816
LOC102158474	1109	ncRNA	0.661469517	22.24323951	-5.071548435	5.99E-08	down	ssc:102158474	uncharacterized LOC102158474
LOC102159793	1693	ncRNA	0.475147333	187.2160118	-8.622113182	0	down	ssc:102159793	uncharacterized LOC102159793
LOC102159790	51131	ncRNA	27.94060934	71.04627198	-1.346395465	4.58E-04	down	ssc:102159790	uncharacterized LOC102159790
LOC102162963	3044	ncRNA	0.119298255	34.49573463	-8.175701229	0	down	ssc:102162963	uncharacterized LOC102162963
LOC102160788	8113	pseudo	1.367387814	211.9529012	-7.276177431	0	down		uncharacterized LOC102160788
LOC100152750	1828	pseudo	0.119298255	94.18335068	-9.624755294	0	down		selenide, water dikinase 1-like
LOC100516782	14253	pseudo	0.597435503	66.84126498	-6.805812253	0	down		uncharacterized LOC100516782
LOC102158467	1554	ncRNA	32.80454234	0	20	0.012112735	up	ssc:102158467	uncharacterized LOC102158467
LOC102159315	2196	ncRNA	0.059649128	68.21064422	-10.15928013	0	down	ssc:102159315	uncharacterized LOC102159315
LOC102159312	5638	ncRNA	0.137037773	28.28435953	-7.689287082	0	down	ssc:102159312	uncharacterized LOC102159312
LOC102159310	9528	ncRNA	0.119298255	9.788199559	-6.358398665	8.48E-06	down	ssc:102159310	uncharacterized LOC102159310
LOC102159311	5388	ncRNA	480.252032	55.05110047	3.124948409	0.002501263	up	ssc:102159311	uncharacterized LOC102159311
LOC102159782	32652	ncRNA	4.704291854	45.1440159	-3.26248529	1.46E-10	down	ssc:102159782	uncharacterized LOC102159782
LOC102162953	11369	pseudo	0.520046858	349.7861327	-9.393615759	0	down		microtubule-associated protein 4-like
LOC102161622	1145	ncRNA	1.018913538	388.1845248	-8.573567161	0	down	ssc:102161622	uncharacterized LOC102161622
LOC102162955	109931	ncRNA	0	32.03290679	-20	0	down	ssc:102162955	uncharacterized LOC102162955
LOC102163801	6244	pseudo	0.725503531	52.61615924	-6.180379496	0	down	ssc:102163801	uncharacterized LOC102163801
LOC102161624	25814	ncRNA	0.936095794	17.80486562	-4.249471564	0.03604712	down	ssc:102161624	uncharacterized LOC102161624
LOC100622824	2339	ncRNA	74.27202325	8.304338447	3.160881732	0.011870212	up	ssc:100622824	uncharacterized LOC100622824
LOC102166078	2802	ncRNA	0	200.5839713	-20	0	down	ssc:102166078	uncharacterized LOC102166078
LOC100621972	11225	pseudo	19.20345992	222.0463858	-3.531422916	0	down		malate dehydrogenase, cytoplasmic-like
LOC100516332	405	ncRNA	0.265205787	15.37139211	-5.856991762	1.26E-07	down	ssc:100516332	uncharacterized LOC100516332
LOC102166074	19161	pseudo	0.128168014	91.51504257	-9.479828827	0	down		kelch-like protein 7-like
LOC102159307	265	pseudo	0.332229716	62.86228627	-7.563869813	0	down		ribosomal protein S27 pseudogene
LOC100516336	1049	pseudo	0.265205787	41.19585923	-7.279243266	0	down		olfactory receptor 1G1-like
LOC102159308	20431	ncRNA	0.579695986	68.98559839	-6.894854908	0	down	ssc:102159308	uncharacterized LOC102159308
LOC100155800	673	pseudo	0.137037773	56.27957896	-8.681894115	0	down		ferritin, light polypeptide pseudogene
LOC102159306	1691	ncRNA	0.205556659	14.14291362	-6.104399443	1.10E-04	down	ssc:102159306	uncharacterized LOC102159306
LOC102162948	1108	pseudo	13.11339647	1.602746127	3.032423576	0.03364233	up		zinc finger protein 615-like
LOC102159788	10061	ncRNA	1.54230107	109.6927081	-6.152239396	0	down	ssc:102159788	uncharacterized LOC102159788
LOC102159785	592	ncRNA	0.059649128	18.29214741	-8.260507695	1.10E-08	down	ssc:102159785	uncharacterized LOC102159785
LOC102158452	2605	ncRNA	0.196686901	28.9418964	-7.20111477	0	down	ssc:102158452	uncharacterized LOC102158452
LOC102159300	22175	ncRNA	0	31.77752416	-20	0	down	ssc:102159300	uncharacterized LOC102159300
LOC102160761	2270	ncRNA	0.597435503	19.52502905	-5.030397911	3.45E-06	down	ssc:102160761	uncharacterized LOC102160761
LOC102162940	3756	ncRNA	0.511177099	109.403568	-7.74162087	0	down	ssc:102162940	uncharacterized LOC102162940
LOC102158440	7014	ncRNA	5.553678499	39.87491462	-2.843965862	1.24E-09	down	ssc:102158440	uncharacterized LOC102158440
LOC102160762	908	ncRNA	0	9.704539734	-20	0.023744115	down	ssc:102160762	uncharacterized LOC102160762
LOC102161610	516	ncRNA	0.135542815	24.01624072	-7.469117889	0	down	ssc:102161610	uncharacterized LOC102161610
LOC102167397	1483	ncRNA	21.33561366	1068.539982	-5.646233474	0	down	ssc:102167397	uncharacterized LOC102167397
LOC100158061	1796	pseudo	3.827000948	14.430586	-1.914843723	0.004978485	down		protein NDRG3-like
LOC102166064	21943	ncRNA	0.137037773	229.7783149	-10.71145333	0	down	ssc:102166064	uncharacterized LOC102166064
LOC102166068	6275	ncRNA	0.469267489	81.06490299	-7.432523112	0	down	ssc:102166068	uncharacterized LOC102166068
LOC100622811	886	pseudo	1.2264159	39.38910055	-5.005276262	0	down		ribosomal protein S2e pseudogene
LOC102166069	30604	ncRNA	1.053348361	12.04995027	-3.515972648	4.53E-04	down	ssc:102166069	uncharacterized LOC102166069
LOC102161604	785	ncRNA	2.373848211	26.10480092	-3.459015563	1.13E-07	down	ssc:102161604	uncharacterized LOC102161604
LOC102161605	268	ncRNA	0	59.9444664	-20	0	down	ssc:102161605	uncharacterized LOC102161605
LOC102160758	5222	pseudo	0.205556659	15.1717827	-6.205710692	1.17E-04	down		hexokinase-1-like
LOC102161606	2199	ncRNA	6.325576513	17.83715538	-1.495616679	0.038466767	down	ssc:102161606	uncharacterized LOC102161606
LOC102157595	1744	ncRNA	0.315985156	37.90377172	-6.906340818	0	down	ssc:102157595	uncharacterized LOC102157595
LOC102159774	2678	ncRNA	0.731483361	9.246612269	-3.660027942	0.00108762	down	ssc:102159774	uncharacterized LOC102159774
LOC102158442	4313	ncRNA	0.262215872	99.81644559	-8.572378706	0	down	ssc:102158442	uncharacterized LOC102158442
LOC102162939	6293	ncRNA	0.384504042	33.17772545	-6.431072407	0	down	ssc:102162939	uncharacterized LOC102162939
LOC102158444	1174	pseudo	0.135542815	58.25512501	-8.747492523	0	down		lactoylglutathione lyase-like
LOC102157596	18501	pseudo	3.79640028	64.46650011	-4.085845643	0	down		serine/arginine repetitive matrix protein 3-like
LOC102163861	568	ncRNA	0	12.25396283	-20	3.72E-06	down	ssc:102163861	uncharacterized LOC102163861
LOC102163864	1593	ncRNA	0.068518886	18.29214741	-8.06050703	1.11E-08	down	ssc:102163864	uncharacterized LOC102163864
LOC102158033	4054	ncRNA	0.333724674	29.96929777	-6.488683115	0	down	ssc:102158033	uncharacterized LOC102158033
LOC102161204	1825	ncRNA	0.520046858	235.5376334	-8.823100251	0	down	ssc:102161204	uncharacterized LOC102161204
LOC102160358	3029	ncRNA	0.126673057	37.32695924	-8.202964482	0	down	ssc:102160358	uncharacterized LOC102160358
LOC100621950	62955	pseudo	0.93704002	27.62829037	-4.881891816	7.20E-13	down	ssc:100621950	metabotropic glutamate receptor 5-like
LOC100518538	10390	pseudo	0.40224356	18.57835208	-5.529409405	3.41E-11	down		vomeronasal type-2 receptor 26-like
LOC100627257	32415	pseudo	0.315985156	18.75007488	-5.89089576	5.76E-07	down		40S ribosomal protein S8-like
LOC102160349	113042	pseudo	2.227489934	69.75908485	-4.968890296	0	down	ssc:102160349	myosin-6-like
LOC102163858	12658	ncRNA	0.187817142	32.43359332	-7.432016317	0	down	ssc:102163858	uncharacterized LOC102163858
LOC102159367	697	pseudo	0.205556659	17.14586104	-6.382180434	7.97E-06	down		60S ribosomal protein L28-like
LOC102164700	2635	ncRNA	0.254841071	32.80492553	-7.008170831	0	down	ssc:102164700	uncharacterized LOC102164700
LOC102159353	6618	ncRNA	0.059649128	11.39094569	-7.57717077	1.64E-07	down	ssc:102159353	uncharacterized LOC102159353
LOC102162522	2532	ncRNA	0	65.0711992	-20	0	down	ssc:102162522	uncharacterized LOC102162522
LOC102161675	969	pseudo	0.059649128	47.97817595	-9.651661554	0	down		probable palmitoyltransferase ZDHHC12-like
LOC102162521	9075	ncRNA	0.137037773	55.04816504	-8.649977053	0	down	ssc:102162521	uncharacterized LOC102162521
LOC102164703	1966	ncRNA	58.39795307	589.7225116	-3.336046561	0	down	ssc:102164703	uncharacterized LOC102164703
LOC102162523	909	ncRNA	1.941654701	23.84598564	-3.618387852	0.00186591	down	ssc:102162523	uncharacterized LOC102162523
LOC102163857	676	ncRNA	0.76601817	7.931538524	-3.372150222	0.001011034	down	ssc:102163857	uncharacterized LOC102163857
LOC102160348	1621	ncRNA	0	22.2417718	-20	9.71E-14	down	ssc:102160348	uncharacterized LOC102160348
LOC102163856	2530	ncRNA	0.24746627	48.72084036	-7.621163313	0	down	ssc:102163856	uncharacterized LOC102163856
LOC102162525	4104	ncRNA	1.002568992	91.06445369	-6.505114595	0	down	ssc:102162525	uncharacterized LOC102162525
LOC102159358	9346	ncRNA	1.388567992	55.08192252	-5.309909189	0	down	ssc:102159358	uncharacterized LOC102159358
LOC102159356	9321	pseudo	0.757148411	18.00447503	-4.571635609	6.97E-08	down	ssc:102159356	zinc finger protein 165-like
LOC102159357	30333	ncRNA	0.137037773	23.35723613	-7.413152149	0	down	ssc:102159357	uncharacterized LOC102159357
LOC102162992	350	ncRNA	0.5185519	26.76527323	-5.689730179	3.12E-12	down	ssc:102162992	uncharacterized LOC102162992
LOC102159342	7336	ncRNA	0.128168014	9.617944476	-6.229620427	1.11E-06	down	ssc:102159342	uncharacterized LOC102159342
LOC102162511	14993	ncRNA	0.128168014	55.58975233	-8.760638879	0	down	ssc:102162511	uncharacterized LOC102162511
LOC102158010	4617	ncRNA	0.683693907	128.473605	-7.553905704	0	down	ssc:102158010	uncharacterized LOC102158010
LOC102160334	1554	pseudo	0.128168014	20.15027617	-7.296619536	6.86E-13	down		small ubiquitin-related modifier 2-like
LOC102161667	628	ncRNA	0.178947383	31.40178881	-7.455167489	4.44E-16	down	ssc:102161667	uncharacterized LOC102161667
LOC102161668	6250	ncRNA	0	14.22510573	-20	8.41E-05	down	ssc:102161668	uncharacterized LOC102161668
LOC100519889	144243	pseudo	837.3404919	75.03112156	3.480253364	0.01442271	up	ssc:100519889	G-protein coupled receptor 98-like
LOC102160327	4345	ncRNA	0.128168014	96.76506354	-9.56030619	0	down	ssc:102160327	uncharacterized LOC102160327
LOC102162506	5299	ncRNA	20.78169722	2.835627763	2.873573418	0.025402882	up	ssc:102162506	uncharacterized LOC102162506
LOC102158017	63424	ncRNA	1.193376049	188.6837281	-7.304777474	0	down	ssc:102158017	uncharacterized LOC102158017
LOC100516371	1591	pseudo	0.256336028	15.45651965	-5.914035428	4.06E-09	down		olfactory receptor 10AD1-like
LOC102158014	12184	ncRNA	0.315985156	135.9119909	-8.748600242	0	down	ssc:102158014	uncharacterized LOC102158014
LOC102162982	945	pseudo	0.137037773	448.0702825	-11.67493572	0	down		calponin-3-like
LOC102158481	3066	ncRNA	0	40.73939948	-20	0	down	ssc:102158481	uncharacterized LOC102158481
LOC102160325	7627	ncRNA	2.494641424	123.4951116	-5.629477666	0	down	ssc:102160325	uncharacterized LOC102160325
LOC102160326	1547	ncRNA	0.128168014	88.34330779	-9.428940776	0	down	ssc:102160326	uncharacterized LOC102160326
LOC102161657	3065	pseudo	0.333724674	110.3840025	-8.369657033	0	down		40S ribosomal protein S3a-like
LOC100519878	2657	ncRNA	64.520958	233.9613062	-1.858430184	2.84E-14	down	ssc:100519878	uncharacterized LOC100519878
LOC102159338	3327	pseudo	0.068518886	10.19328924	-7.216902244	0.014040017	down		phosphatidylinositol transfer protein beta isoform-like
LOC102160318	3646	ncRNA	0	29.85628362	-20	0	down	ssc:102160318	uncharacterized LOC102160318
LOC102158008	5408	ncRNA	185.7407482	22.36212453	3.054161188	0.031346006	up	ssc:102158008	uncharacterized LOC102158008
LOC102158007	16624	ncRNA	1.012933708	357.0586666	-8.461477567	0	down	ssc:102158007	uncharacterized LOC102158007
LOC102158487	2054	ncRNA	0.137037773	23.18844877	-7.402688891	6.14E-14	down	ssc:102158487	uncharacterized LOC102158487
LOC102167348	17373	ncRNA	0.342594432	39.67236978	-6.855489062	0	down	ssc:102167348	uncharacterized LOC102167348
LOC102166012	5879	ncRNA	0	82.80854988	-20	0	down	ssc:102166012	uncharacterized LOC102166012
LOC102165163	666	ncRNA	0.732978318	46.86271161	-5.998526101	0	down	ssc:102165163	uncharacterized LOC102165163
LOC102166015	8088	ncRNA	0.068518886	15.37432754	-7.809805889	1.78E-07	down	ssc:102166015	uncharacterized LOC102166015
LOC102165166	2467	ncRNA	0.470762446	87.45093632	-7.537330782	0	down	ssc:102165166	uncharacterized LOC102165166
LOC102166498	15216	ncRNA	2.304427834	440.7948132	-7.579554849	0	down	ssc:102166498	uncharacterized LOC102166498
LOC102167344	10611	ncRNA	0.119298255	44.11074367	-8.530413328	0	down	ssc:102167344	uncharacterized LOC102167344
LOC102166497	27244	ncRNA	0.195191943	391.9859098	-10.97169258	0	down	ssc:102166497	uncharacterized LOC102166497
LOC102165160	4117	ncRNA	0.068518886	163.5402813	-11.2208567	0	down	ssc:102165160	uncharacterized LOC102165160
LOC102157547	5062	ncRNA	0	42.05594095	-20	0	down	ssc:102157547	uncharacterized LOC102157547
LOC100627214	41262	ncRNA	37.31670393	10.27841678	1.860203505	0.003891227	up	ssc:100627214	Uncharacterized protein
LOC102159726	5491	ncRNA	0.588565744	28.57203191	-5.601256251	3.55E-15	down	ssc:102159726	uncharacterized LOC102159726
LOC102158875	2834	ncRNA	0.068518886	77.4939494	-10.14336625	0	down	ssc:102158875	uncharacterized LOC102158875
LOC100626360	3443	pseudo	29.90150497	1.890418508	3.983440534	0.006754047	up		probable phospholipid-transporting ATPase IF-like
LOC102157545	1223	ncRNA	0.119298255	41.27805134	-8.43465811	0	down	ssc:102157545	uncharacterized LOC102157545
LOC102160705	2525	ncRNA	0.5185519	22.44431664	-5.43571797	7.75E-09	down	ssc:102160705	uncharacterized LOC102160705
LOC102158871	22140	ncRNA	0.059649128	71.68913169	-10.23103766	0	down	ssc:102158871	uncharacterized LOC102158871
LOC102158872	1506	ncRNA	0.059649128	12.53869978	-7.715670998	9.33E-04	down	ssc:102158872	uncharacterized LOC102158872
LOC100621908	262	pseudo	0.059649128	13.39878149	-7.81138505	5.40E-05	down		60S ribosomal protein L37a-like
LOC102166009	1371	ncRNA	0.272580588	80.29288425	-8.202445503	0	down	ssc:102166009	uncharacterized LOC102166009
LOC102165159	607	ncRNA	0.068518886	32.4321256	-8.88670616	0	down	ssc:102165159	uncharacterized LOC102165159
LOC102167338	1889	ncRNA	0.390383886	312.9714064	-9.646921637	0	down	ssc:102167338	uncharacterized LOC102167338
LOC102166006	6092	ncRNA	0.059649128	13.27989648	-7.798527145	3.55E-08	down	ssc:102166006	uncharacterized LOC102166006
LOC102165157	6375	ncRNA	29.89044035	153.2882834	-2.358491372	1.09E-07	down	ssc:102165157	uncharacterized LOC102165157
LOC102166005	28892	ncRNA	96.58485533	40.78930184	1.243606176	0.043791214	up	ssc:102166005	uncharacterized LOC102166005
LOC102157537	50858	ncRNA	0.126673057	89.0492793	-9.457350429	0	down	ssc:102157537	uncharacterized LOC102157537
LOC102166480	17543	ncRNA	0.674824148	40.16552244	-5.895302231	0	down	ssc:102166480	uncharacterized LOC102166480
LOC102157533	2138	ncRNA	0.119298255	16.68793357	-7.128088565	2.09E-10	down	ssc:102157533	uncharacterized LOC102157533
LOC102157531	3978	ncRNA	0	58.70864933	-20	0	down	ssc:102157531	uncharacterized LOC102157531
LOC102158862	107313	ncRNA	0	48.17925307	-20	0	down	ssc:102158862	uncharacterized LOC102158862
LOC102167329	5107	ncRNA	0.137037773	137.3518205	-9.969086707	0	down	ssc:102167329	uncharacterized LOC102167329
LOC102166474	18641	ncRNA	1.617744012	221.4255418	-7.096694501	0	down	ssc:102166474	uncharacterized LOC102166474
LOC102166478	7946	ncRNA	2.85845877	372.3728178	-7.025366473	0	down	ssc:102166478	uncharacterized LOC102166478
LOC100512812	42369	pseudo	16.93177037	90.31738613	-2.415270906	0	down	ssc:100512812	protein bassoon-like
LOC102164297	33798	ncRNA	2.22843416	430.8833254	-7.595123122	0	down	ssc:102164297	uncharacterized LOC102164297
LOC102159707	3735	ncRNA	0.537786375	353.643291	-9.361045971	0	down	ssc:102159707	uncharacterized LOC102159707
LOC102166470	8380	ncRNA	0.204061702	14.88411032	-6.188623735	0.001822981	down	ssc:102166470	uncharacterized LOC102166470
LOC102158857	10301	ncRNA	5.674471712	39.87638234	-2.812976541	8.27E-05	down	ssc:102158857	uncharacterized LOC102158857
LOC102158856	3229	ncRNA	0.314490198	9.330272094	-4.890832195	0.00214123	down	ssc:102158856	uncharacterized LOC102158856
LOC102157522	7165	ncRNA	0.137037773	17.4320657	-6.991026118	1.52E-06	down	ssc:102157522	uncharacterized LOC102157522
LOC102158852	787	ncRNA	0.205556659	16.68793357	-6.343125399	9.54E-10	down	ssc:102158852	uncharacterized LOC102158852
LOC102158854	2205	ncRNA	0.383009085	26.68014569	-6.122244121	2.29E-13	down	ssc:102158854	uncharacterized LOC102158854
LOC102165132	605	ncRNA	1.817871573	25.36360423	-3.802437584	9.64E-05	down	ssc:102165132	uncharacterized LOC102165132
LOC102167791	15934	ncRNA	0.205556659	67.47091524	-8.358585811	0	down	ssc:102167791	uncharacterized LOC102167791
LOC102166467	3301	ncRNA	0.274075546	56.44983404	-7.686251919	0	down	ssc:102166467	uncharacterized LOC102166467
LOC102167797	8171	ncRNA	0.342594432	28.85676886	-6.396264252	2.22E-16	down	ssc:102167797	uncharacterized LOC102167797
LOC102167796	4878	ncRNA	3.861085012	243.4970585	-5.978754215	0	down	ssc:102167796	uncharacterized LOC102167796
LOC102157519	1986	ncRNA	5.796759882	44.68902387	-2.946601901	5.30E-09	down	ssc:102157519	uncharacterized LOC102157519
LOC102158843	4872	ncRNA	0.187817142	284.1953619	-10.56333855	0	down	ssc:102158843	uncharacterized LOC102158843
LOC100523921	22536	pseudo	0.196686901	62.91659177	-8.321395834	0	down		proteasome maturation protein-like
LOC102158840	12579	ncRNA	0.40224356	231.5865413	-9.169266375	0	down	ssc:102158840	uncharacterized LOC102158840
LOC102157581	1033	ncRNA	4.55045879	62.49242178	-3.779597336	0	down	ssc:102157581	uncharacterized LOC102157581
LOC102160751	19033	ncRNA	0.852276574	27.25255502	-4.998926005	1.11E-16	down	ssc:102160751	uncharacterized LOC102160751
LOC102160752	2613	ncRNA	0.068518886	22.613104	-8.366441618	2.00E-12	down	ssc:102160752	uncharacterized LOC102160752
LOC100738044	715	pseudo	0.059649128	27.99815486	-8.874614998	0	down		dnaJ homolog subfamily B member 6-like
LOC102162932	8941	ncRNA	0.059649128	18.86749218	-8.305185921	3.23E-11	down	ssc:102162932	uncharacterized LOC102162932
LOC102160755	15959	ncRNA	0	21.58129949	-20	3.77E-11	down	ssc:102160755	uncharacterized LOC102160755
LOC102166054	39204	ncRNA	0.196686901	23.84598564	-6.921701729	4.61E-13	down	ssc:102166054	uncharacterized LOC102166054
LOC100624148	8020	ncRNA	0.187817142	55.91118219	-8.217664297	0	down	ssc:100624148	uncharacterized LOC100624148
LOC102167383	1076	ncRNA	1.623723842	120.0870745	-6.208630781	0	down	ssc:102167383	uncharacterized LOC102167383
LOC102166051	1413	pseudo	0.391878844	80.58055663	-7.683880273	0	down		protein N-terminal glutamine amidohydrolase-like
LOC100522644	57968	ncRNA	112.3405231	16.68940129	2.75087432	0.038975005	up	ssc:100522644	uncharacterized LOC100522644
LOC102158434	2014	ncRNA	0.059649128	11.30581814	-7.566348641	1.72E-08	down	ssc:102158434	uncharacterized LOC102158434
LOC102160747	8182	pseudo	0.059649128	47.31770364	-9.631663305	0	down		ATP synthase subunit d, mitochondrial-like
LOC102158431	23202	ncRNA	0.780767772	70.0174029	-6.486676236	0	down	ssc:102158431	uncharacterized LOC102158431
LOC102162929	6490	ncRNA	0.616669978	152.5177324	-7.950262659	0	down	ssc:102162929	uncharacterized LOC102162929
LOC102160740	8948	ncRNA	0.478137248	357.2245186	-9.545190591	0	down	ssc:102160740	uncharacterized LOC102160740
LOC102162922	9126	ncRNA	0	55.16558234	-20	0	down	ssc:102162922	uncharacterized LOC102162922
LOC102166044	17723	ncRNA	1.332359524	93.03266116	-6.125681958	0	down	ssc:102166044	uncharacterized LOC102166044
LOC102166042	1309	ncRNA	0.670339276	17.80339791	-4.731117341	2.50E-09	down	ssc:102166042	uncharacterized LOC102166042
LOC102167379	1178	ncRNA	2.132361771	34.78047158	-4.027753366	4.17E-10	down	ssc:102167379	uncharacterized LOC102167379
LOC100625468	7659	pseudo	0.068518886	64.46062925	-9.877700851	0	down		heterogeneous nuclear ribonucleoprotein D-like
LOC102166041	5232	ncRNA	0.137037773	117.2514467	-9.740816398	0	down	ssc:102166041	uncharacterized LOC102166041
LOC102165191	4068	ncRNA	0.330734758	16.40319662	-5.632158508	1.13E-04	down	ssc:102165191	uncharacterized LOC102165191
LOC100521322	11947	ncRNA	2.388047082	67.21700033	-4.814922976	0	down	ssc:100521322	uncharacterized LOC100521322
LOC102159756	975	ncRNA	3.42918501	362.8943064	-6.72553987	0	down	ssc:102159756	uncharacterized LOC102159756
LOC102162912	2124	ncRNA	1.537916183	180.8299785	-6.877513183	0	down	ssc:102162912	uncharacterized LOC102162912
LOC100518122	4548	ncRNA	2.364527707	369.8777002	-7.289352466	0	down	ssc:100518122	uncharacterized LOC100518122
LOC100523503	3148	pseudo	0.137037773	55.50462479	-8.661890565	0	down		60S ribosomal protein L9-like
LOC102159755	13714	ncRNA	0	58.25512501	-20	0	down	ssc:102159755	uncharacterized LOC102159755
LOC102158422	4391	ncRNA	0.059649128	113.3032901	-10.89140109	0	down	ssc:102158422	uncharacterized LOC102158422
LOC102162919	10671	ncRNA	0	13.39878149	-20	4.01E-06	down	ssc:102162919	uncharacterized LOC102162919
LOC102162918	627	ncRNA	1.39145792	24.58865005	-4.143323346	2.03E-05	down	ssc:102162918	uncharacterized LOC102162918
LOC102157574	801	ncRNA	1.218490367	169.7457855	-7.122137099	0	down	ssc:102157574	uncharacterized LOC102157574
LOC102162910	14966	ncRNA	0.205556659	57.59465271	-8.130254951	0	down	ssc:102162910	uncharacterized LOC102162910
LOC102166033	1349	ncRNA	0.26371083	20.35282101	-6.270128145	9.90E-09	down	ssc:102166033	uncharacterized LOC102166033
LOC102165187	1072	ncRNA	0.205556659	115.7910691	-9.137772156	0	down	ssc:102165187	uncharacterized LOC102165187
LOC102167364	2972	ncRNA	0.205556659	14.22657345	-6.112908301	0.001756423	down	ssc:102167364	uncharacterized LOC102167364
LOC100738026	585	pseudo	0	29.11068377	-20	0	down		interferon alpha-1-like
LOC102165185	1027	ncRNA	0.205556659	197.1186933	-9.905312771	0	down	ssc:102165185	uncharacterized LOC102165185
LOC102166037	11367	pseudo	11.24693394	323.6226231	-4.846708801	0	down		60S ribosomal protein L37a-like
LOC102165180	15143	ncRNA	0.332229716	19.03334411	-5.840204132	2.44E-08	down	ssc:102165180	uncharacterized LOC102165180
LOC102158412	38052	ncRNA	2.758845734	270.685034	-6.616406526	0	down	ssc:102158412	uncharacterized LOC102158412
LOC102160726	573	ncRNA	0.059649128	45.42728513	-9.572842333	0	down	ssc:102160726	uncharacterized LOC102160726
LOC102157562	3378	ncRNA	0.332229716	18.86455675	-5.827353272	1.28E-09	down	ssc:102157562	uncharacterized LOC102157562
LOC102158892	1687	ncRNA	0.469267489	57.96745263	-6.948688765	0	down	ssc:102158892	uncharacterized LOC102158892
LOC102157564	7972	ncRNA	0	41.3646466	-20	0	down	ssc:102157564	uncharacterized LOC102157564
LOC102162907	3264	ncRNA	2.881033918	709.0830666	-7.943224188	0	down	ssc:102162907	uncharacterized LOC102162907
LOC102158880	6485	ncRNA	5.370388966	707.2880496	-7.041127492	0	down	ssc:102158880	uncharacterized LOC102158880
LOC102167359	7123	ncRNA	20.08454064	57.63134561	-1.52076824	5.06E-05	down	ssc:102167359	uncharacterized LOC102167359
LOC102167353	855	ncRNA	0.254841071	12.16589986	-5.577101419	1.70E-07	down	ssc:102167353	uncharacterized LOC102167353
LOC102166023	4871	ncRNA	2.800755345	590.7352358	-7.720551893	0	down	ssc:102166023	uncharacterized LOC102166023
LOC100738039	33579	ncRNA	109.5334227	613.8092027	-2.48641912	0	down	ssc:100738039	Uncharacterized protein
LOC102167352	741	ncRNA	0.850781616	248.3023615	-8.189093407	0	down	ssc:102167352	uncharacterized LOC102167352
LOC100739367	21906	ncRNA	40.54152728	11.67861807	1.795530869	0.004651946	up	ssc:100739367	uncharacterized LOC100739367
LOC100154078	3862	pseudo	0.786747602	52.04521763	-6.047720915	0	down		GTP-binding nuclear protein Ran-like
LOC102158409	474	pseudo	0	10.27841678	-20	0.001277282	down		60S ribosomal protein L35a-like
LOC102167350	1204	ncRNA	0.442658213	84.93380298	-7.584001851	0	down	ssc:102167350	uncharacterized LOC102167350
LOC102157559	3579	pseudo	0.204061702	191.5413716	-9.874434879	0	down		programmed cell death protein 2-like
LOC102157551	8820	ncRNA	0.399253645	166.9218995	-8.707651949	0	down	ssc:102157551	uncharacterized LOC102157551
LOC102157550	35134	ncRNA	0.604810304	239.0645555	-8.626701813	0	down	ssc:102157550	uncharacterized LOC102157550
LOC100517296	539	pseudo	0.847791701	19.9814888	-4.558810426	9.93E-05	down		ribosomal protein S19 pseudogene
