# Supplementary material for: Integrated Analysis of LncRNA-mRNA Coexpression in the Extracellular Matrix of Developing Deciduous Teeth in Miniature Pigs
Source: Biomed Res Int. 2019 Jan 23;2019:6159490. doi: 10.1155/2019/6159490 (PMC6364112; doi:10.1155/2019/6159490)
Supplement: Supplementary Materials — Supplementary Table 1: the identified differentially expressed genes during the deciduous tooth germ transition from the cap stage to bell stage (E40 to E50) (XLS 100 kb). Supplementary Table 2: the identified differentially expressed genes during the deciduous tooth germ transition from the early bell stage to late bell stage (E50 to E60) (XLS 71kb). Supplementary Table 3: the identified differentially expressed lncRNAs during the deciduous tooth germ transition from the cap stage to the early bell stage (E40 to E50) (XLS 211kb). Supplementary Table 4: the identified differentially expressed lncRNAs during the deciduous tooth germ transition from the early bell stage to the late bell stage (E50 to E60) (XLS 626 kb). Supplementary Table 5: the significantly enriched KEGG pathways associated with the grouped DEGs (XLS 169kb). Supplementary Table 6: the expression changes of the ECM pathway genes from E40 to E50 and from E50 to E60 (XLS 11kb). Supplementary Table 7: the miRNA-target lncRNA and mRNA regulatory interactions of the ECM pathway (XLS 27kb). Supplementary Table 8: lncRNA and mRNA colocation analysis of the ECM pathway genes (XLS 30kb). Supplementary Figures: the developmental morphology of tooth germs at key development stages E40, E50, and E60 (Supplementary Figure 1). The coexpressed analysis of ECM genes and lncRNAs (Supplementary Figure 2) (DOCX 15mb). [file 6159490.f1.zip › Supplementary materials/Supplementary Table 4.xls]

AccID	type_of_gene	Location	Strand	KeggID	Description	E60	E50	Log2FC	FDR	Style
LOC102164116	ncRNA	chr7:58931138-58932849	+		insulin-like growth factor 2 mRNA binding protein 1 pseudogene	18.84496837	0.32613004	5.852588227	7.98E-08	up
LOC102164116	ncRNA	chr7:58931138-58932849	+		insulin-like growth factor 2 mRNA binding protein 1 pseudogene	18.84496837	0.32613004	5.852588227	7.98E-08	up
LOC102164116	ncRNA	chr7:58931138-58932849	+		insulin-like growth factor 2 mRNA binding protein 1 pseudogene	18.84496837	0.32613004	5.852588227	7.98E-08	up
LOC100738364	ncRNA	chr13:11540374-11576104	+		tigger transposable element-derived protein 1-like	42.00151049	0.367341618	6.837175046	0	up
LOC100738364	ncRNA	chr13:11540374-11576104	+		tigger transposable element-derived protein 1-like	42.00151049	0.367341618	6.837175046	0	up
LOC100738364	ncRNA	chr13:11540374-11576104	+		tigger transposable element-derived protein 1-like	42.00151049	0.367341618	6.837175046	0	up
LOC100623490	ncRNA	chr13:217263900-217287105	+	ssc:100623490	keratin-associated protein 10-7-like	15.64762155	0.054170967	8.174207834	6.76E-06	up
LOC100623490	ncRNA	chr13:217263900-217287105	+	ssc:100623490	keratin-associated protein 10-7-like	15.64762155	0.054170967	8.174207834	6.76E-06	up
LOC100623490	ncRNA	chr13:217263900-217287105	+	ssc:100623490	keratin-associated protein 10-7-like	15.64762155	0.054170967	8.174207834	6.76E-06	up
LOC100623490	ncRNA	chr13:217263900-217287105	+	ssc:100623490	keratin-associated protein 10-7-like	15.64762155	0.054170967	8.174207834	6.76E-06	up
LOC102164107	ncRNA	chr4:55391112-55394286	+		eukaryotic translation initiation factor 4B-like	337.9983145	0.601121565	9.135143559	0	up
LOC102164107	ncRNA	chr4:55391112-55394286	+		eukaryotic translation initiation factor 4B-like	337.9983145	0.601121565	9.135143559	0	up
LOC102164107	ncRNA	chr4:55391112-55394286	+		eukaryotic translation initiation factor 4B-like	337.9983145	0.601121565	9.135143559	0	up
LOC102166758	ncRNA			null	uncharacterized LOC102166758	20.92808827	0.316203103	6.048445197	7.41E-08	up
LOC102166758	ncRNA			null	uncharacterized LOC102166758	20.92808827	0.316203103	6.048445197	7.41E-08	up
LOC102166758	ncRNA			null	uncharacterized LOC102166758	20.92808827	0.316203103	6.048445197	7.41E-08	up
LOC100154267	ncRNA	chr17:42073922-42098923	+		ATP synthase subunit O, mitochondrial-like	20.92808827	0.831719334	4.653199952	1.74E-05	up
LOC100154267	ncRNA	chr17:42073922-42098923	+		ATP synthase subunit O, mitochondrial-like	20.92808827	0.831719334	4.653199952	1.74E-05	up
LOC100154267	ncRNA	chr17:42073922-42098923	+		ATP synthase subunit O, mitochondrial-like	20.92808827	0.831719334	4.653199952	1.74E-05	up
LOC100157780	ncRNA	chr5:29332183-29332877	+		PRELI domain-containing protein 1, mitochondrial-like	10.46404413	0.111099728	6.557441438	8.66E-06	up
LOC100157780	ncRNA	chr5:29332183-29332877	+		PRELI domain-containing protein 1, mitochondrial-like	10.46404413	0.111099728	6.557441438	8.66E-06	up
LOC100157780	ncRNA	chr5:29332183-29332877	+		PRELI domain-containing protein 1, mitochondrial-like	10.46404413	0.111099728	6.557441438	8.66E-06	up
LOC102164575	ncRNA	chr3:46288744-46289602	-	ssc:102164575	60S ribosomal protein L35a-like	29.4059018	0	20	0	up
LOC102164575	ncRNA	chr3:46288744-46289602	-	ssc:102164575	60S ribosomal protein L35a-like	29.4059018	0	20	0	up
LOC102165422	ncRNA	chr13:97765666-97766400	+		ribosomal protein S4 pseudogene	57.60068739	0.111099728	9.018086936	0	up
LOC102165422	ncRNA	chr13:97765666-97766400	+		ribosomal protein S4 pseudogene	57.60068739	0.111099728	9.018086936	0	up
LOC102165422	ncRNA	chr13:97765666-97766400	+		ribosomal protein S4 pseudogene	57.60068739	0.111099728	9.018086936	0	up
LOC102157805	ncRNA			null	nucleolar protein 56-like	27.17744796	0.159480449	7.41288661	2.00E-09	up
LOC102157805	ncRNA			null	nucleolar protein 56-like	27.17744796	0.159480449	7.41288661	2.00E-09	up
LOC102157805	ncRNA			null	nucleolar protein 56-like	27.17744796	0.159480449	7.41288661	2.00E-09	up
LOC102165898	ncRNA			null	Sjogren syndrome nuclear autoantigen 1 pseudogene	70.14785142	0.159480449	8.780875537	0	up
LOC102165898	ncRNA			null	Sjogren syndrome nuclear autoantigen 1 pseudogene	70.14785142	0.159480449	8.780875537	0	up
LOC102165898	ncRNA			null	Sjogren syndrome nuclear autoantigen 1 pseudogene	70.14785142	0.159480449	8.780875537	0	up
LOC102165005	ncRNA	chr3:104114857-104116259	-		GTP-binding nuclear protein Ran-like	38.80416367	0.055549864	9.448212368	0	up
LOC102165005	ncRNA	chr3:104114857-104116259	-		GTP-binding nuclear protein Ran-like	38.80416367	0.055549864	9.448212368	0	up
LOC102165005	ncRNA	chr3:104114857-104116259	-		GTP-binding nuclear protein Ran-like	38.80416367	0.055549864	9.448212368	0	up
LOC100516919	ncRNA	chr7:86504506-86563616	-		kinesin-like protein KIF23-like	21.89698124	0.152311305	7.16756515	8.28E-06	up
LOC100516919	ncRNA	chr7:86504506-86563616	-		kinesin-like protein KIF23-like	21.89698124	0.152311305	7.16756515	8.28E-06	up
LOC100516919	ncRNA	chr7:86504506-86563616	-		kinesin-like protein KIF23-like	21.89698124	0.152311305	7.16756515	8.28E-06	up
LOC100737478	ncRNA	chr16:37194529-37195936	+		RING finger and transmembrane domain-containing protein 1-like	7.315141965	0.096761442	6.24030979	9.98E-04	up
LOC100737478	ncRNA	chr16:37194529-37195936	+		RING finger and transmembrane domain-containing protein 1-like	7.315141965	0.096761442	6.24030979	9.98E-04	up
LOC100737478	ncRNA	chr16:37194529-37195936	+		RING finger and transmembrane domain-containing protein 1-like	7.315141965	0.096761442	6.24030979	9.98E-04	up
LOC102158716	ncRNA	chr4:89187414-89187966	-		fatty acid-binding protein, heart-like	23.10809746	0.159480449	7.178875106	4.32E-09	up
LOC102158716	ncRNA	chr4:89187414-89187966	-		fatty acid-binding protein, heart-like	23.10809746	0.159480449	7.178875106	4.32E-09	up
LOC102158716	ncRNA	chr4:89187414-89187966	-		fatty acid-binding protein, heart-like	23.10809746	0.159480449	7.178875106	4.32E-09	up
LOC102167633	ncRNA	chr18:46909947-46914521	+		alkaline ceramidase 3-like	16.71340383	0	20	0.001871274	up
LOC102167633	ncRNA	chr18:46909947-46914521	+		alkaline ceramidase 3-like	16.71340383	0	20	0.001871274	up
LOC102167633	ncRNA	chr18:46909947-46914521	+		alkaline ceramidase 3-like	16.71340383	0	20	0.001871274	up
LOC100155550	ncRNA	chr5:21454846-21456649	-		olfactory receptor 6C2-like	13.6129463	0.102551687	7.052484309	7.32E-08	up
LOC100155550	ncRNA	chr5:21454846-21456649	-		olfactory receptor 6C2-like	13.6129463	0.102551687	7.052484309	7.32E-08	up
LOC100155550	ncRNA	chr5:21454846-21456649	-		olfactory receptor 6C2-like	13.6129463	0.102551687	7.052484309	7.32E-08	up
LOC100155550	ncRNA	chr5:21454846-21456649	-		olfactory receptor 6C2-like	13.6129463	0.102551687	7.052484309	7.32E-08	up
LOC100515624	ncRNA			null	60S ribosomal protein L23a-like	22.04231519	0.222199456	6.632276671	4.33E-15	up
LOC100515624	ncRNA			null	60S ribosomal protein L23a-like	22.04231519	0.222199456	6.632276671	4.33E-15	up
LOC100515624	ncRNA			null	60S ribosomal protein L23a-like	22.04231519	0.222199456	6.632276671	4.33E-15	up
LOC102164969	ncRNA	chrx:109478218-109478659	-		ferritin, light polypeptide pseudogene	18.94185767	0	20	3.51E-09	up
LOC102164969	ncRNA	chrx:109478218-109478659	-		ferritin, light polypeptide pseudogene	18.94185767	0	20	3.51E-09	up
LOC102164969	ncRNA	chrx:109478218-109478659	-		ferritin, light polypeptide pseudogene	18.94185767	0	20	3.51E-09	up
LOC102162304	ncRNA	chr9:3378890-3380345	+		interferon-induced very large GTPase 1-like	13.75828025	0.103930585	7.048536065	1.55E-04	up
LOC102162304	ncRNA	chr9:3378890-3380345	+		interferon-induced very large GTPase 1-like	13.75828025	0.103930585	7.048536065	1.55E-04	up
LOC102162304	ncRNA	chr9:3378890-3380345	+		interferon-induced very large GTPase 1-like	13.75828025	0.103930585	7.048536065	1.55E-04	up
LOC102165886	ncRNA			null	synapsin-1-like	53.53133689	0.103930585	9.0086196	0	up
LOC102165886	ncRNA			null	synapsin-1-like	53.53133689	0.103930585	9.0086196	0	up
LOC102165886	ncRNA			null	synapsin-1-like	53.53133689	0.103930585	9.0086196	0	up
LOC102164559	ncRNA	chr10:54070117-54072799	-		lanC-like protein 1-like	158.5108908	0.884661131	7.485241314	0	up
LOC102164559	ncRNA	chr10:54070117-54072799	-		lanC-like protein 1-like	158.5108908	0.884661131	7.485241314	0	up
LOC102164559	ncRNA	chr10:54070117-54072799	-		lanC-like protein 1-like	158.5108908	0.884661131	7.485241314	0	up
LOC100623857	ncRNA	chr15:10599662-10600323	-		uncharacterized LOC100623857	20.92808827	0.222199456	6.557441438	1.22E-08	up
LOC100623857	ncRNA	chr15:10599662-10600323	-		uncharacterized LOC100623857	20.92808827	0.222199456	6.557441438	1.22E-08	up
LOC100623857	ncRNA	chr15:10599662-10600323	-		uncharacterized LOC100623857	20.92808827	0.222199456	6.557441438	1.22E-08	up
LOC100155946	ncRNA	chr14:131846693-131854830	-		ATP synthase subunit beta, mitochondrial-like	11.52982641	0.200692026	5.844243684	6.88E-06	up
LOC100155946	ncRNA	chr14:131846693-131854830	-		ATP synthase subunit beta, mitochondrial-like	11.52982641	0.200692026	5.844243684	6.88E-06	up
LOC100155946	ncRNA	chr14:131846693-131854830	-		ATP synthase subunit beta, mitochondrial-like	11.52982641	0.200692026	5.844243684	6.88E-06	up
LOC102164545	ncRNA			null	40S ribosomal protein S3a-like	24.27076903	0.048380721	8.970571844	5.11E-15	up
LOC102164545	ncRNA			null	40S ribosomal protein S3a-like	24.27076903	0.048380721	8.970571844	5.11E-15	up
LOC102164545	ncRNA			null	40S ribosomal protein S3a-like	24.27076903	0.048380721	8.970571844	5.11E-15	up
LOC100524157	ncRNA	chr8:112082904-112091714	+		protein FAM49B-like	20.97653292	0.158101551	7.05178091	1.61E-13	up
LOC100524157	ncRNA	chr8:112082904-112091714	+		protein FAM49B-like	20.97653292	0.158101551	7.05178091	1.61E-13	up
LOC100524157	ncRNA	chr8:112082904-112091714	+		protein FAM49B-like	20.97653292	0.158101551	7.05178091	1.61E-13	up
LOC102166727	ncRNA			null	ribosomal protein L39 pseudogene	18.79652372	0.096761442	7.601817893	7.66E-07	up
LOC102166727	ncRNA			null	ribosomal protein L39 pseudogene	18.79652372	0.096761442	7.601817893	7.66E-07	up
LOC102166727	ncRNA			null	ribosomal protein L39 pseudogene	18.79652372	0.096761442	7.601817893	7.66E-07	up
LOC102166727	ncRNA			null	ribosomal protein L39 pseudogene	18.79652372	0.096761442	7.601817893	7.66E-07	up
LOC100621638	ncRNA			null	small ubiquitin-related modifier 2-like	16.71340383	0.055549864	8.233006487	3.28E-07	up
LOC100621638	ncRNA			null	small ubiquitin-related modifier 2-like	16.71340383	0.055549864	8.233006487	3.28E-07	up
LOC100621638	ncRNA			null	small ubiquitin-related modifier 2-like	16.71340383	0.055549864	8.233006487	3.28E-07	up
LOC100736622	ncRNA	chr15:88484290-88485182	+		ferritin, light polypeptide pseudogene	13.56450166	0.215030313	5.979152187	3.38E-04	up
LOC100736622	ncRNA	chr15:88484290-88485182	+		ferritin, light polypeptide pseudogene	13.56450166	0.215030313	5.979152187	3.38E-04	up
LOC100736622	ncRNA	chr15:88484290-88485182	+		ferritin, light polypeptide pseudogene	13.56450166	0.215030313	5.979152187	3.38E-04	up
LOC100736622	ncRNA	chr15:88484290-88485182	+		ferritin, light polypeptide pseudogene	13.56450166	0.215030313	5.979152187	3.38E-04	up
LOC100737953	ncRNA	chr1:224611581-224613541	-		interferon tau-11-like	139.7628117	0.469893305	8.216431609	0	up
LOC100737953	ncRNA	chr1:224611581-224613541	-		interferon tau-11-like	139.7628117	0.469893305	8.216431609	0	up
LOC100737953	ncRNA	chr1:224611581-224613541	-		interferon tau-11-like	139.7628117	0.469893305	8.216431609	0	up
LOC100152879	ncRNA	chr14:69255561-69262437	-		proteasome subunit alpha type-5-like	587.0038092	2.108261963	8.121171914	0	up
LOC100152879	ncRNA	chr14:69255561-69262437	-		proteasome subunit alpha type-5-like	587.0038092	2.108261963	8.121171914	0	up
LOC100152879	ncRNA	chr14:69255561-69262437	-		proteasome subunit alpha type-5-like	587.0038092	2.108261963	8.121171914	0	up
LOC100152874	ncRNA			null	interferon omega-1-like	27.32278191	0.111099728	7.942105288	5.58E-14	up
LOC100152874	ncRNA			null	interferon omega-1-like	27.32278191	0.111099728	7.942105288	5.58E-14	up
LOC100152874	ncRNA			null	interferon omega-1-like	27.32278191	0.111099728	7.942105288	5.58E-14	up
LOC100153722	ncRNA			null	zinc finger protein 252-like	23.01120817	3.503453866	2.715486928	0.036029314	up
LOC100153722	ncRNA			null	zinc finger protein 252-like	23.01120817	3.503453866	2.715486928	0.036029314	up
LOC100153722	ncRNA			null	zinc finger protein 252-like	23.01120817	3.503453866	2.715486928	0.036029314	up
LOC100153722	ncRNA			null	zinc finger protein 252-like	23.01120817	3.503453866	2.715486928	0.036029314	up
LOC100737967	ncRNA	chr12:16124699-16125395	+		family with sequence similarity 32, member A pseudogene	23.05965282	0.048380721	8.896722814	1.61E-14	up
LOC100737967	ncRNA	chr12:16124699-16125395	+		family with sequence similarity 32, member A pseudogene	23.05965282	0.048380721	8.896722814	1.61E-14	up
LOC100737967	ncRNA	chr12:16124699-16125395	+		family with sequence similarity 32, member A pseudogene	23.05965282	0.048380721	8.896722814	1.61E-14	up
LOC102162833	ncRNA	chr1:11319186-11334835	+		GA binding protein transcription factor, alpha subunit 60kDa pseudogene	59.68380729	0.152311305	8.614172728	0	up
LOC102162833	ncRNA	chr1:11319186-11334835	+		GA binding protein transcription factor, alpha subunit 60kDa pseudogene	59.68380729	0.152311305	8.614172728	0	up
LOC102162833	ncRNA	chr1:11319186-11334835	+		GA binding protein transcription factor, alpha subunit 60kDa pseudogene	59.68380729	0.152311305	8.614172728	0	up
LOC102168132	ncRNA			null	inositol polyphosphate 1-phosphatase-like	19.95919529	0.220820558	6.498035253	8.28E-06	up
LOC102168132	ncRNA			null	inositol polyphosphate 1-phosphatase-like	19.95919529	0.220820558	6.498035253	8.28E-06	up
LOC102168132	ncRNA			null	inositol polyphosphate 1-phosphatase-like	19.95919529	0.220820558	6.498035253	8.28E-06	up
LOC100736604	ncRNA	chr2:157480293-157481622	-		motile sperm domain-containing protein 1-like	27.27433726	0.048380721	9.138896163	0	up
LOC100736604	ncRNA	chr2:157480293-157481622	-		motile sperm domain-containing protein 1-like	27.27433726	0.048380721	9.138896163	0	up
LOC100736604	ncRNA	chr2:157480293-157481622	-		motile sperm domain-containing protein 1-like	27.27433726	0.048380721	9.138896163	0	up
LOC102162829	ncRNA	chr6:76176271-76193615	-		dnaJ homolog subfamily A member 1-like	66.07850092	0.213651415	8.272778274	0	up
LOC102162829	ncRNA	chr6:76176271-76193615	-		dnaJ homolog subfamily A member 1-like	66.07850092	0.213651415	8.272778274	0	up
LOC102162829	ncRNA	chr6:76176271-76193615	-		dnaJ homolog subfamily A member 1-like	66.07850092	0.213651415	8.272778274	0	up
LOC100620741	ncRNA	chr9:101281770-101283317	+		40S ribosomal protein S27-like	105.8031129	0.215030313	8.94262631	0	up
LOC100620741	ncRNA	chr9:101281770-101283317	+		40S ribosomal protein S27-like	105.8031129	0.215030313	8.94262631	0	up
LOC100620741	ncRNA	chr9:101281770-101283317	+		40S ribosomal protein S27-like	105.8031129	0.215030313	8.94262631	0	up
LOC100515147	ncRNA	chr6:130800922-130801758	-		ATPase, Na+/K+ transporting, beta 3 polypeptide pseudogene	52.32022067	0.32613004	7.325777479	2.55E-15	up
LOC100515147	ncRNA	chr6:130800922-130801758	-		ATPase, Na+/K+ transporting, beta 3 polypeptide pseudogene	52.32022067	0.32613004	7.325777479	2.55E-15	up
LOC100515147	ncRNA	chr6:130800922-130801758	-		ATPase, Na+/K+ transporting, beta 3 polypeptide pseudogene	52.32022067	0.32613004	7.325777479	2.55E-15	up
LOC102160209	ncRNA	chr1:181291339-181302513	+	ssc:102160209	sodium/potassium/calcium exchanger 1-like	35.75215079	3.162031026	3.499106606	7.62E-05	up
LOC102160209	ncRNA	chr1:181291339-181302513	+	ssc:102160209	sodium/potassium/calcium exchanger 1-like	35.75215079	3.162031026	3.499106606	7.62E-05	up
LOC102160209	ncRNA	chr1:181291339-181302513	+	ssc:102160209	sodium/potassium/calcium exchanger 1-like	35.75215079	3.162031026	3.499106606	7.62E-05	up
LOC100620719	ncRNA	chr1:97794395-97795681	-		acidic leucine-rich nuclear phosphoprotein 32 family member B-like	13.56450166	0.960189799	3.820372626	0.032620567	up
LOC100620719	ncRNA	chr1:97794395-97795681	-		acidic leucine-rich nuclear phosphoprotein 32 family member B-like	13.56450166	0.960189799	3.820372626	0.032620567	up
LOC100620719	ncRNA	chr1:97794395-97795681	-		acidic leucine-rich nuclear phosphoprotein 32 family member B-like	13.56450166	0.960189799	3.820372626	0.032620567	up
LOC100620719	ncRNA	chr1:97794395-97795681	-		acidic leucine-rich nuclear phosphoprotein 32 family member B-like	13.56450166	0.960189799	3.820372626	0.032620567	up
LOC102162858	ncRNA			null	guanine nucleotide-binding protein G(I)/G(S)/G(O) subunit gamma-5-like	33.4752523	0.159480449	7.71357155	2.96E-12	up
LOC102162858	ncRNA			null	guanine nucleotide-binding protein G(I)/G(S)/G(O) subunit gamma-5-like	33.4752523	0.159480449	7.71357155	2.96E-12	up
LOC102162858	ncRNA			null	guanine nucleotide-binding protein G(I)/G(S)/G(O) subunit gamma-5-like	33.4752523	0.159480449	7.71357155	2.96E-12	up
LOC100521853	ncRNA	chr9:22582040-22583625	+	ssc:100521853	protein tyrosine phosphatase type IVA 1-like	13.6129463	2.45973667	2.468403569	0.040676197	up
LOC100521853	ncRNA	chr9:22582040-22583625	+	ssc:100521853	protein tyrosine phosphatase type IVA 1-like	13.6129463	2.45973667	2.468403569	0.040676197	up
LOC100521853	ncRNA	chr9:22582040-22583625	+	ssc:100521853	protein tyrosine phosphatase type IVA 1-like	13.6129463	2.45973667	2.468403569	0.040676197	up
LOC100521853	ncRNA	chr9:22582040-22583625	+	ssc:100521853	protein tyrosine phosphatase type IVA 1-like	13.6129463	2.45973667	2.468403569	0.040676197	up
LOC102157874	ncRNA			null	ferritin, light polypeptide pseudogene	34.49258993	0	20	0	up
LOC102157874	ncRNA			null	ferritin, light polypeptide pseudogene	34.49258993	0	20	0	up
LOC102157874	ncRNA			null	ferritin, light polypeptide pseudogene	34.49258993	0	20	0	up
LOC100516041	ncRNA	chr13:25466647-25467209	-		glutaredoxin (thioltransferase) pseudogene	5.328911365	0.111099728	5.583913649	9.47E-04	up
LOC100516041	ncRNA	chr13:25466647-25467209	-		glutaredoxin (thioltransferase) pseudogene	5.328911365	0.111099728	5.583913649	9.47E-04	up
LOC100516041	ncRNA	chr13:25466647-25467209	-		glutaredoxin (thioltransferase) pseudogene	5.328911365	0.111099728	5.583913649	9.47E-04	up
LOC100739262	ncRNA	chr3:83522659-83524262	+		nucleoporin p54-like	11.48138176	0.111099728	6.691297185	1.41E-04	up
LOC100739262	ncRNA	chr3:83522659-83524262	+		nucleoporin p54-like	11.48138176	0.111099728	6.691297185	1.41E-04	up
LOC100739262	ncRNA	chr3:83522659-83524262	+		nucleoporin p54-like	11.48138176	0.111099728	6.691297185	1.41E-04	up
LOC102158780	ncRNA			null	uncharacterized LOC102158780	34.58947922	0.103930585	8.37856921	0	up
LOC102158780	ncRNA			null	uncharacterized LOC102158780	34.58947922	0.103930585	8.37856921	0	up
LOC102158780	ncRNA			null	uncharacterized LOC102158780	34.58947922	0.103930585	8.37856921	0	up
LOC102167257	ncRNA			null	programmed cell death protein 2-like	58.56958037	0.270580176	7.757951601	1.22E-15	up
LOC102167257	ncRNA			null	programmed cell death protein 2-like	58.56958037	0.270580176	7.757951601	1.22E-15	up
LOC102167257	ncRNA			null	programmed cell death protein 2-like	58.56958037	0.270580176	7.757951601	1.22E-15	up
LOC102159635	ncRNA	chr13:33968769-33970767	+		UPF0462 protein C4orf33-like	20.92808827	0.048380721	8.756792553	1.57E-10	up
LOC102159635	ncRNA	chr13:33968769-33970767	+		UPF0462 protein C4orf33-like	20.92808827	0.048380721	8.756792553	1.57E-10	up
LOC102159635	ncRNA	chr13:33968769-33970767	+		UPF0462 protein C4orf33-like	20.92808827	0.048380721	8.756792553	1.57E-10	up
LOC100624251	ncRNA	chr10:47720922-47726122	-	ssc:100624251	voltage-dependent L-type calcium channel subunit beta-2-like	79.0616668	6.487679192	3.607203984	0	up
LOC100624251	ncRNA	chr10:47720922-47726122	-	ssc:100624251	voltage-dependent L-type calcium channel subunit beta-2-like	79.0616668	6.487679192	3.607203984	0	up
LOC100624251	ncRNA	chr10:47720922-47726122	-	ssc:100624251	voltage-dependent L-type calcium channel subunit beta-2-like	79.0616668	6.487679192	3.607203984	0	up
LOC100738390	ncRNA	chr17:49698675-49699858	+		ras-related protein R-Ras-like	16.76184848	0.055549864	8.237182163	1.36E-10	up
LOC100738390	ncRNA	chr17:49698675-49699858	+		ras-related protein R-Ras-like	16.76184848	0.055549864	8.237182163	1.36E-10	up
LOC100738390	ncRNA	chr17:49698675-49699858	+		ras-related protein R-Ras-like	16.76184848	0.055549864	8.237182163	1.36E-10	up
LOC100626895	ncRNA	chr1:303033159-303033782	+		60S ribosomal protein L35a-like	38.85260831	0.158101551	7.941016122	0	up
LOC100626895	ncRNA	chr1:303033159-303033782	+		60S ribosomal protein L35a-like	38.85260831	0.158101551	7.941016122	0	up
LOC100626895	ncRNA	chr1:303033159-303033782	+		60S ribosomal protein L35a-like	38.85260831	0.158101551	7.941016122	0	up
LOC102157433	ncRNA			null	40S ribosomal protein S3a-like	20.00763994	0	20	1.33E-10	up
LOC102157433	ncRNA			null	40S ribosomal protein S3a-like	20.00763994	0	20	1.33E-10	up
LOC102157433	ncRNA			null	40S ribosomal protein S3a-like	20.00763994	0	20	1.33E-10	up
LOC102165799	ncRNA			null	uncharacterized LOC102165799	24.07699044	0.048380721	8.959007093	2.73E-12	up
LOC102165799	ncRNA			null	uncharacterized LOC102165799	24.07699044	0.048380721	8.959007093	2.73E-12	up
LOC102165799	ncRNA			null	uncharacterized LOC102165799	24.07699044	0.048380721	8.959007093	2.73E-12	up
LOC102165799	ncRNA			null	uncharacterized LOC102165799	24.07699044	0.048380721	8.959007093	2.73E-12	up
LOC102167970	ncRNA	chr3:9534092-9545042	-		NADH dehydrogenase [ubiquinone] 1 alpha subcomplex subunit 13-like	12.54716403	0.310412857	5.337029194	1.21E-04	up
LOC102167970	ncRNA	chr3:9534092-9545042	-		NADH dehydrogenase [ubiquinone] 1 alpha subcomplex subunit 13-like	12.54716403	0.310412857	5.337029194	1.21E-04	up
LOC102167970	ncRNA	chr3:9534092-9545042	-		NADH dehydrogenase [ubiquinone] 1 alpha subcomplex subunit 13-like	12.54716403	0.310412857	5.337029194	1.21E-04	up
LOC102167970	ncRNA	chr3:9534092-9545042	-		NADH dehydrogenase [ubiquinone] 1 alpha subcomplex subunit 13-like	12.54716403	0.310412857	5.337029194	1.21E-04	up
LOC102162280	ncRNA	chr1:297341024-297342013	-		60S ribosomal protein L7-like	80.70878485	0.200692026	8.651598607	0	up
LOC102162280	ncRNA	chr1:297341024-297342013	-		60S ribosomal protein L7-like	80.70878485	0.200692026	8.651598607	0	up
LOC102162280	ncRNA	chr1:297341024-297342013	-		60S ribosomal protein L7-like	80.70878485	0.200692026	8.651598607	0	up
LOC100624459	ncRNA			null	interferon omega-1-like	27.22589261	0.055549864	8.936980256	5.18E-14	up
LOC100624459	ncRNA			null	interferon omega-1-like	27.22589261	0.055549864	8.936980256	5.18E-14	up
LOC100624459	ncRNA			null	interferon omega-1-like	27.22589261	0.055549864	8.936980256	5.18E-14	up
LOC100626635	ncRNA	chr6:82219639-82220213	+		L-xylulose reductase-like	28.34011953	0.111099728	7.99484675	0	up
LOC100626635	ncRNA	chr6:82219639-82220213	+		L-xylulose reductase-like	28.34011953	0.111099728	7.99484675	0	up
LOC100626635	ncRNA	chr6:82219639-82220213	+		L-xylulose reductase-like	28.34011953	0.111099728	7.99484675	0	up
LOC100739558	ncRNA	chr5:36366584-36367284	+		nuclear transport factor 2-like	14.63028393	0.103930585	7.137193685	2.62E-06	up
LOC100739558	ncRNA	chr5:36366584-36367284	+		nuclear transport factor 2-like	14.63028393	0.103930585	7.137193685	2.62E-06	up
LOC100739558	ncRNA	chr5:36366584-36367284	+		nuclear transport factor 2-like	14.63028393	0.103930585	7.137193685	2.62E-06	up
LOC102163598	ncRNA	chr13:131407131-131439218	+		5-hydroxytryptamine receptor 3C-like	18.94185767	0.422891482	5.485146515	6.01E-04	up
LOC102163598	ncRNA	chr13:131407131-131439218	+		5-hydroxytryptamine receptor 3C-like	18.94185767	0.422891482	5.485146515	6.01E-04	up
LOC102163598	ncRNA	chr13:131407131-131439218	+		5-hydroxytryptamine receptor 3C-like	18.94185767	0.422891482	5.485146515	6.01E-04	up
LOC102163113	ncRNA	chr6:132769312-132811434	+		uncharacterized LOC102163113	24.02854579	0.374510761	6.003598355	2.15E-06	up
LOC102163113	ncRNA	chr6:132769312-132811434	+		uncharacterized LOC102163113	24.02854579	0.374510761	6.003598355	2.15E-06	up
LOC102163113	ncRNA	chr6:132769312-132811434	+		uncharacterized LOC102163113	24.02854579	0.374510761	6.003598355	2.15E-06	up
LOC100156563	ncRNA	chr4:119570679-119619143	-		elongation factor 1-alpha 1-like	376.9962567	0.166649592	11.1435167	0	up
LOC100156563	ncRNA	chr4:119570679-119619143	-		elongation factor 1-alpha 1-like	376.9962567	0.166649592	11.1435167	0	up
LOC100156563	ncRNA	chr4:119570679-119619143	-		elongation factor 1-alpha 1-like	376.9962567	0.166649592	11.1435167	0	up
LOC100738685	ncRNA	chr14:123417386-123418712	-		transmembrane protein 126B pseudogene	20.00763994	0.219441661	6.510569742	3.83E-07	up
LOC100738685	ncRNA	chr14:123417386-123418712	-		transmembrane protein 126B pseudogene	20.00763994	0.219441661	6.510569742	3.83E-07	up
LOC100738685	ncRNA	chr14:123417386-123418712	-		transmembrane protein 126B pseudogene	20.00763994	0.219441661	6.510569742	3.83E-07	up
LOC100621396	ncRNA	chr13:13368279-13369784	-		60S ribosomal protein L11-like	94.22484186	0.491400735	7.583063643	0	up
LOC100621396	ncRNA	chr13:13368279-13369784	-		60S ribosomal protein L11-like	94.22484186	0.491400735	7.583063643	0	up
LOC100621396	ncRNA	chr13:13368279-13369784	-		60S ribosomal protein L11-like	94.22484186	0.491400735	7.583063643	0	up
LOC100523335	ncRNA	chr15:124684675-124685480	+		transmembrane protein 106C pseudogene	68.06473152	0.263411033	8.013447858	0	up
LOC100523335	ncRNA	chr15:124684675-124685480	+		transmembrane protein 106C pseudogene	68.06473152	0.263411033	8.013447858	0	up
LOC100523335	ncRNA	chr15:124684675-124685480	+		transmembrane protein 106C pseudogene	68.06473152	0.263411033	8.013447858	0	up
LOC102164029	ncRNA	chr4:103066934-103068331	+		NADH dehydrogenase [ubiquinone] flavoprotein 2, mitochondrial-like	35.5583722	0.262032136	7.084301715	4.08E-11	up
LOC102164029	ncRNA	chr4:103066934-103068331	+		NADH dehydrogenase [ubiquinone] flavoprotein 2, mitochondrial-like	35.5583722	0.262032136	7.084301715	4.08E-11	up
LOC102164029	ncRNA	chr4:103066934-103068331	+		NADH dehydrogenase [ubiquinone] flavoprotein 2, mitochondrial-like	35.5583722	0.262032136	7.084301715	4.08E-11	up
LOC100737369	ncRNA	chrx:116227751-116233274	-		partitioning defective 6 homolog beta-like	165.5353649	0.152311305	10.08590072	0	up
LOC100737369	ncRNA	chrx:116227751-116233274	-		partitioning defective 6 homolog beta-like	165.5353649	0.152311305	10.08590072	0	up
LOC100737369	ncRNA	chrx:116227751-116233274	-		partitioning defective 6 homolog beta-like	165.5353649	0.152311305	10.08590072	0	up
LOC100153481	ncRNA	chr14:52254715-52255231	+		immunoglobulin omega chain-like	12.54716403	0.207861169	5.915597233	3.22E-05	up
LOC100153481	ncRNA	chr14:52254715-52255231	+		immunoglobulin omega chain-like	12.54716403	0.207861169	5.915597233	3.22E-05	up
LOC100153481	ncRNA	chr14:52254715-52255231	+		immunoglobulin omega chain-like	12.54716403	0.207861169	5.915597233	3.22E-05	up
LOC100627918	ncRNA	chr1:96828313-96836363	-		serine/threonine-protein kinase 17A-like	18.79652372	0.469893305	5.321988847	1.64E-04	up
LOC100627918	ncRNA	chr1:96828313-96836363	-		serine/threonine-protein kinase 17A-like	18.79652372	0.469893305	5.321988847	1.64E-04	up
LOC100627918	ncRNA	chr1:96828313-96836363	-		serine/threonine-protein kinase 17A-like	18.79652372	0.469893305	5.321988847	1.64E-04	up
LOC100154345	ncRNA	chr1:293662576-293664308	+		galactose mutarotase (aldose 1-epimerase) pseudogene	88.21770541	4.638566641	4.249317262	0	up
LOC100154345	ncRNA	chr1:293662576-293664308	+		galactose mutarotase (aldose 1-epimerase) pseudogene	88.21770541	4.638566641	4.249317262	0	up
LOC100154345	ncRNA	chr1:293662576-293664308	+		galactose mutarotase (aldose 1-epimerase) pseudogene	88.21770541	4.638566641	4.249317262	0	up
LOC100521145	ncRNA	chr10:58921034-58921574	+		calmodulin 1 (phosphorylase kinase, delta) pseudogene	60.84647886	0.215030313	8.144489918	0	up
LOC100521145	ncRNA	chr10:58921034-58921574	+		calmodulin 1 (phosphorylase kinase, delta) pseudogene	60.84647886	0.215030313	8.144489918	0	up
LOC100521145	ncRNA	chr10:58921034-58921574	+		calmodulin 1 (phosphorylase kinase, delta) pseudogene	60.84647886	0.215030313	8.144489918	0	up
LOC102164003	ncRNA			null	60S ribosomal protein L5-like	24.02854579	0.048380721	8.956101362	2.57E-09	up
LOC102164003	ncRNA			null	60S ribosomal protein L5-like	24.02854579	0.048380721	8.956101362	2.57E-09	up
LOC102164003	ncRNA			null	60S ribosomal protein L5-like	24.02854579	0.048380721	8.956101362	2.57E-09	up
LOC100739525	ncRNA			null	40S ribosomal protein S15a-like	19.91075065	0.103930585	7.581783529	8.26E-12	up
LOC100739525	ncRNA			null	40S ribosomal protein S15a-like	19.91075065	0.103930585	7.581783529	8.26E-12	up
LOC100739525	ncRNA			null	40S ribosomal protein S15a-like	19.91075065	0.103930585	7.581783529	8.26E-12	up
LOC100514862	ncRNA	chr9:56722153-56723113	+		olfactory receptor 147-like	13.66139095	0.048380721	8.141456404	0.015262779	up
LOC100514862	ncRNA	chr9:56722153-56723113	+		olfactory receptor 147-like	13.66139095	0.048380721	8.141456404	0.015262779	up
LOC100514862	ncRNA	chr9:56722153-56723113	+		olfactory receptor 147-like	13.66139095	0.048380721	8.141456404	0.015262779	up
LOC102163543	ncRNA	chr1:92980248-92982080	+		tigger transposable element-derived protein 1-like	48.25087018	0.482852694	6.642828023	0	up
LOC102163543	ncRNA	chr1:92980248-92982080	+		tigger transposable element-derived protein 1-like	48.25087018	0.482852694	6.642828023	0	up
LOC102163543	ncRNA	chr1:92980248-92982080	+		tigger transposable element-derived protein 1-like	48.25087018	0.482852694	6.642828023	0	up
LOC102162211	ncRNA	chr6:125661445-125665178	+		ubiquitin-40S ribosomal protein S27a-like	18.89341302	0.103930585	7.506119259	8.77E-06	up
LOC102162211	ncRNA	chr6:125661445-125665178	+		ubiquitin-40S ribosomal protein S27a-like	18.89341302	0.103930585	7.506119259	8.77E-06	up
LOC102162211	ncRNA	chr6:125661445-125665178	+		ubiquitin-40S ribosomal protein S27a-like	18.89341302	0.103930585	7.506119259	8.77E-06	up
LOC102158194	ncRNA	chr14:120310279-120311701	-		estrogen receptor binding site associated, antigen, 9 pseudogene	18.84496837	0	20	2.71E-06	up
LOC102158194	ncRNA	chr14:120310279-120311701	-		estrogen receptor binding site associated, antigen, 9 pseudogene	18.84496837	0	20	2.71E-06	up
LOC102158194	ncRNA	chr14:120310279-120311701	-		estrogen receptor binding site associated, antigen, 9 pseudogene	18.84496837	0	20	2.71E-06	up
LOC100737312	ncRNA	chr1:117830763-117832444	-		KATNB1-like protein 1-like	13.7098356	0.054170967	7.983475723	6.14E-04	up
LOC100737312	ncRNA	chr1:117830763-117832444	-		KATNB1-like protein 1-like	13.7098356	0.054170967	7.983475723	6.14E-04	up
LOC100737312	ncRNA	chr1:117830763-117832444	-		KATNB1-like protein 1-like	13.7098356	0.054170967	7.983475723	6.14E-04	up
LOC102164871	ncRNA			null	splicing factor 3B subunit 4-like	28.34011953	0	20	3.33E-16	up
LOC102164871	ncRNA			null	splicing factor 3B subunit 4-like	28.34011953	0	20	3.33E-16	up
LOC102164871	ncRNA			null	splicing factor 3B subunit 4-like	28.34011953	0	20	3.33E-16	up
LOC102165713	ncRNA	chr18:52032596-52034497	+		mitochondrial carrier 2 pseudogene	81.91990107	0.425923933	7.587474364	0	up
LOC102165713	ncRNA	chr18:52032596-52034497	+		mitochondrial carrier 2 pseudogene	81.91990107	0.425923933	7.587474364	0	up
LOC102165713	ncRNA	chr18:52032596-52034497	+		mitochondrial carrier 2 pseudogene	81.91990107	0.425923933	7.587474364	0	up
LOC100511379	ncRNA			null	zinc finger protein 296-like	16.76184848	0.324751143	5.689702842	5.62E-08	up
LOC100511379	ncRNA			null	zinc finger protein 296-like	16.76184848	0.324751143	5.689702842	5.62E-08	up
LOC100511379	ncRNA			null	zinc finger protein 296-like	16.76184848	0.324751143	5.689702842	5.62E-08	up
LOC100511379	ncRNA			null	zinc finger protein 296-like	16.76184848	0.324751143	5.689702842	5.62E-08	up
LOC100623527	ncRNA			null	hairy and enhancer of split-related protein HELT-like	16.81029312	0.311791754	5.752618297	0.026123151	up
LOC100623527	ncRNA			null	hairy and enhancer of split-related protein HELT-like	16.81029312	0.311791754	5.752618297	0.026123151	up
LOC100623527	ncRNA			null	hairy and enhancer of split-related protein HELT-like	16.81029312	0.311791754	5.752618297	0.026123151	up
LOC100623527	ncRNA			null	hairy and enhancer of split-related protein HELT-like	16.81029312	0.311791754	5.752618297	0.026123151	up
LOC100739506	ncRNA	chr1:265778336-265779516	-		AP-3 complex subunit sigma-1-like	54.45178522	0.109720831	8.954998091	0	up
LOC100739506	ncRNA	chr1:265778336-265779516	-		AP-3 complex subunit sigma-1-like	54.45178522	0.109720831	8.954998091	0	up
LOC100739506	ncRNA	chr1:265778336-265779516	-		AP-3 complex subunit sigma-1-like	54.45178522	0.109720831	8.954998091	0	up
LOC102158170	ncRNA	chr14:115688770-115689277	-		transmembrane protein 14C pseudogene	47.23353255	0.206482272	7.837649706	0	up
LOC102158170	ncRNA	chr14:115688770-115689277	-		transmembrane protein 14C pseudogene	47.23353255	0.206482272	7.837649706	0	up
LOC102158170	ncRNA	chr14:115688770-115689277	-		transmembrane protein 14C pseudogene	47.23353255	0.206482272	7.837649706	0	up
LOC102160015	ncRNA	chr10:76770259-76772982	+		cyclin E1 pseudogene	84.00302097	0.269201279	8.285612137	0	up
LOC102160015	ncRNA	chr10:76770259-76772982	+		cyclin E1 pseudogene	84.00302097	0.269201279	8.285612137	0	up
LOC102160015	ncRNA	chr10:76770259-76772982	+		cyclin E1 pseudogene	84.00302097	0.269201279	8.285612137	0	up
LOC102161339	ncRNA	chr4:39585225-39586977	-		apolipoprotein O pseudogene	147.5624002	0.27774932	9.053326067	0	up
LOC102161339	ncRNA	chr4:39585225-39586977	-		apolipoprotein O pseudogene	147.5624002	0.27774932	9.053326067	0	up
LOC102161339	ncRNA	chr4:39585225-39586977	-		apolipoprotein O pseudogene	147.5624002	0.27774932	9.053326067	0	up
LOC100516600	ncRNA	chr3:30368470-30368898	+		NADH dehydrogenase (ubiquinone) 1 alpha subcomplex, 5 pseudogene	14.72717323	0.055549864	8.050481449	6.58E-04	up
LOC100516600	ncRNA	chr3:30368470-30368898	+		NADH dehydrogenase (ubiquinone) 1 alpha subcomplex, 5 pseudogene	14.72717323	0.055549864	8.050481449	6.58E-04	up
LOC100516600	ncRNA	chr3:30368470-30368898	+		NADH dehydrogenase (ubiquinone) 1 alpha subcomplex, 5 pseudogene	14.72717323	0.055549864	8.050481449	6.58E-04	up
LOC100516600	ncRNA	chr3:30368470-30368898	+		NADH dehydrogenase (ubiquinone) 1 alpha subcomplex, 5 pseudogene	14.72717323	0.055549864	8.050481449	6.58E-04	up
LOC102158166	ncRNA	chr9:10171757-10173788	+		28S ribosomal protein S31, mitochondrial-like	25.23966201	0	20	7.66E-15	up
LOC102158166	ncRNA	chr9:10171757-10173788	+		28S ribosomal protein S31, mitochondrial-like	25.23966201	0	20	7.66E-15	up
LOC102158166	ncRNA	chr9:10171757-10173788	+		28S ribosomal protein S31, mitochondrial-like	25.23966201	0	20	7.66E-15	up
LOC102163587	ncRNA	chr1:191548492-191577237	-		tigger transposable element-derived protein 1-like	37.68993674	0.318960897	6.884655995	2.32E-13	up
LOC102163587	ncRNA	chr1:191548492-191577237	-		tigger transposable element-derived protein 1-like	37.68993674	0.318960897	6.884655995	2.32E-13	up
LOC102163587	ncRNA	chr1:191548492-191577237	-		tigger transposable element-derived protein 1-like	37.68993674	0.318960897	6.884655995	2.32E-13	up
LOC102166601	ncRNA	chr14:57685133-57685677	+		isochorismatase domain containing 1 pseudogene	23.05965282	0.048380721	8.896722814	1.61E-14	up
LOC102166601	ncRNA	chr14:57685133-57685677	+		isochorismatase domain containing 1 pseudogene	23.05965282	0.048380721	8.896722814	1.61E-14	up
LOC102166601	ncRNA	chr14:57685133-57685677	+		isochorismatase domain containing 1 pseudogene	23.05965282	0.048380721	8.896722814	1.61E-14	up
LOC102160063	ncRNA			null	uncharacterized LOC102160063	203.9035267	2.264984617	6.492241666	0	up
LOC102160063	ncRNA			null	uncharacterized LOC102160063	203.9035267	2.264984617	6.492241666	0	up
LOC102160063	ncRNA			null	uncharacterized LOC102160063	203.9035267	2.264984617	6.492241666	0	up
LOC100518805	ncRNA	chr13:33724525-33724957	-		ribosomal protein S20 pseudogene	25.14277271	0	20	5.95E-12	up
LOC100518805	ncRNA	chr13:33724525-33724957	-		ribosomal protein S20 pseudogene	25.14277271	0	20	5.95E-12	up
LOC100518805	ncRNA	chr13:33724525-33724957	-		ribosomal protein S20 pseudogene	25.14277271	0	20	5.95E-12	up
LOC100515775	ncRNA	chr3:115384817-115387927	-		G protein pathway suppressor 2-like	51.448217	0.373131864	7.107291704	0	up
LOC100515775	ncRNA	chr3:115384817-115387927	-		G protein pathway suppressor 2-like	51.448217	0.373131864	7.107291704	0	up
LOC100515775	ncRNA	chr3:115384817-115387927	-		G protein pathway suppressor 2-like	51.448217	0.373131864	7.107291704	0	up
LOC733587	ncRNA	chr16:29671700-29672693	+	ssc:733587	neuroblastoma RAS viral (v-ras) oncogene homolog pseudogene	45.00507871	0.152311305	8.206920974	2.22E-16	up
LOC733587	ncRNA	chr16:29671700-29672693	+	ssc:733587	neuroblastoma RAS viral (v-ras) oncogene homolog pseudogene	45.00507871	0.152311305	8.206920974	2.22E-16	up
LOC733587	ncRNA	chr16:29671700-29672693	+	ssc:733587	neuroblastoma RAS viral (v-ras) oncogene homolog pseudogene	45.00507871	0.152311305	8.206920974	2.22E-16	up
LOC102165743	ncRNA			null	heterogeneous nuclear ribonucleoprotein A1 pseudogene	34.63792387	0.304622611	6.829185619	0	up
LOC102165743	ncRNA			null	heterogeneous nuclear ribonucleoprotein A1 pseudogene	34.63792387	0.304622611	6.829185619	0	up
LOC102165743	ncRNA			null	heterogeneous nuclear ribonucleoprotein A1 pseudogene	34.63792387	0.304622611	6.829185619	0	up
LOC100153897	ncRNA	chr13:803522-805682	-		elongation factor 1-alpha 1-like	27.27433726	0.096761442	8.138896163	0	up
LOC100153897	ncRNA	chr13:803522-805682	-		elongation factor 1-alpha 1-like	27.27433726	0.096761442	8.138896163	0	up
LOC100153897	ncRNA	chr13:803522-805682	-		elongation factor 1-alpha 1-like	27.27433726	0.096761442	8.138896163	0	up
LOC102164400	ncRNA			null	speedy protein A-like	31.44057705	0.102551687	8.260132657	2.22E-16	up
LOC102164400	ncRNA			null	speedy protein A-like	31.44057705	0.102551687	8.260132657	2.22E-16	up
LOC102164400	ncRNA			null	speedy protein A-like	31.44057705	0.102551687	8.260132657	2.22E-16	up
LOC100152500	ncRNA	chr7:24069426-24071242	-		serine dehydratase pseudogene	28.24323023	0.159480449	7.468381723	8.39E-11	up
LOC100152500	ncRNA	chr7:24069426-24071242	-		serine dehydratase pseudogene	28.24323023	0.159480449	7.468381723	8.39E-11	up
LOC100152500	ncRNA	chr7:24069426-24071242	-		serine dehydratase pseudogene	28.24323023	0.159480449	7.468381723	8.39E-11	up
LOC100517885	ncRNA			null	5'-nucleotidase domain-containing protein 4-like	7.315141965	0.490021837	3.899967914	0.027121244	up
LOC100517885	ncRNA			null	5'-nucleotidase domain-containing protein 4-like	7.315141965	0.490021837	3.899967914	0.027121244	up
LOC100517885	ncRNA			null	5'-nucleotidase domain-containing protein 4-like	7.315141965	0.490021837	3.899967914	0.027121244	up
LOC100517885	ncRNA			null	5'-nucleotidase domain-containing protein 4-like	7.315141965	0.490021837	3.899967914	0.027121244	up
LOC102167183	ncRNA	chr6:50906066-50906394	-		cytochrome b-c1 complex subunit 7-like	14.63028393	0	20	0.043926208	up
LOC102167183	ncRNA	chr6:50906066-50906394	-		cytochrome b-c1 complex subunit 7-like	14.63028393	0	20	0.043926208	up
LOC102167183	ncRNA	chr6:50906066-50906394	-		cytochrome b-c1 complex subunit 7-like	14.63028393	0	20	0.043926208	up
LOC102164904	ncRNA	chr18:10972953-10974213	+		60S ribosomal protein L36-like	35.5583722	0.158101551	7.813193948	2.89E-12	up
LOC102164904	ncRNA	chr18:10972953-10974213	+		60S ribosomal protein L36-like	35.5583722	0.158101551	7.813193948	2.89E-12	up
LOC102164904	ncRNA	chr18:10972953-10974213	+		60S ribosomal protein L36-like	35.5583722	0.158101551	7.813193948	2.89E-12	up
LOC100152999	ncRNA	chr13:121784591-121785591	-		la-related protein 1B-like	78.72255425	0.318960897	7.947253653	0	up
LOC100152999	ncRNA	chr13:121784591-121785591	-		la-related protein 1B-like	78.72255425	0.318960897	7.947253653	0	up
LOC100152999	ncRNA	chr13:121784591-121785591	-		la-related protein 1B-like	78.72255425	0.318960897	7.947253653	0	up
LOC102160543	ncRNA	chr15:112309027-112389352	+		eukaryotic peptide chain release factor subunit 1-like	34.58947922	0.207861169	7.37856921	1.11E-16	up
LOC102160543	ncRNA	chr15:112309027-112389352	+		eukaryotic peptide chain release factor subunit 1-like	34.58947922	0.207861169	7.37856921	1.11E-16	up
LOC102160543	ncRNA	chr15:112309027-112389352	+		eukaryotic peptide chain release factor subunit 1-like	34.58947922	0.207861169	7.37856921	1.11E-16	up
LOC100525040	ncRNA	chr3:109825986-109829587	-		nuclear transport factor 2-like	94.90306694	1.199485336	6.305967285	0	up
LOC100525040	ncRNA	chr3:109825986-109829587	-		nuclear transport factor 2-like	94.90306694	1.199485336	6.305967285	0	up
LOC100525040	ncRNA	chr3:109825986-109829587	-		nuclear transport factor 2-like	94.90306694	1.199485336	6.305967285	0	up
LOC100515215	ncRNA			null	disintegrin and metalloproteinase domain-containing protein 20-like	87.97548217	0.631027308	7.123255266	0	up
LOC100515215	ncRNA			null	disintegrin and metalloproteinase domain-containing protein 20-like	87.97548217	0.631027308	7.123255266	0	up
LOC100515215	ncRNA			null	disintegrin and metalloproteinase domain-containing protein 20-like	87.97548217	0.631027308	7.123255266	0	up
LOC100620408	ncRNA	chr8:58340411-58342445	+	ssc:100620408	small ubiquitin-related modifier 2-like	164.7118058	0.783063957	7.716598105	0	up
LOC100620408	ncRNA	chr8:58340411-58342445	+	ssc:100620408	small ubiquitin-related modifier 2-like	164.7118058	0.783063957	7.716598105	0	up
LOC102158274	ncRNA			null	uncharacterized LOC102158274	42.04995513	0.166649592	7.979142668	0	up
LOC102158274	ncRNA			null	uncharacterized LOC102158274	42.04995513	0.166649592	7.979142668	0	up
LOC102158274	ncRNA			null	uncharacterized LOC102158274	42.04995513	0.166649592	7.979142668	0	up
LOC102160586	ncRNA			null	collagen alpha-1(II) chain-like	357.0370614	13.43111834	4.732422497	0	up
LOC102160586	ncRNA			null	collagen alpha-1(II) chain-like	357.0370614	13.43111834	4.732422497	0	up
LOC102160586	ncRNA			null	collagen alpha-1(II) chain-like	357.0370614	13.43111834	4.732422497	0	up
LOC100739194	ncRNA	chr9:10252810-10254221	-		28S ribosomal protein S31, mitochondrial-like	32.50635933	0.150932408	7.750675561	0	up
LOC100739194	ncRNA	chr9:10252810-10254221	-		28S ribosomal protein S31, mitochondrial-like	32.50635933	0.150932408	7.750675561	0	up
LOC100739194	ncRNA	chr9:10252810-10254221	-		28S ribosomal protein S31, mitochondrial-like	32.50635933	0.150932408	7.750675561	0	up
LOC100515282	ncRNA	chr16:36594441-36594621	-	ssc:100515282	40S ribosomal protein S29-like	12.64405333	0	20	0.00143146	up
LOC100515282	ncRNA	chr16:36594441-36594621	-	ssc:100515282	40S ribosomal protein S29-like	12.64405333	0	20	0.00143146	up
LOC100518790	ncRNA	chr6:148922684-148923789	-		proline-rich protein 3-like	10.41559949	0.152311305	6.095579037	0.004460879	up
LOC100518790	ncRNA	chr6:148922684-148923789	-		proline-rich protein 3-like	10.41559949	0.152311305	6.095579037	0.004460879	up
LOC100518790	ncRNA	chr6:148922684-148923789	-		proline-rich protein 3-like	10.41559949	0.152311305	6.095579037	0.004460879	up
LOC100736939	ncRNA			null	protein MROH8-like	1126.241195	4.984170155	7.81994679	0	up
LOC100736939	ncRNA			null	protein MROH8-like	1126.241195	4.984170155	7.81994679	0	up
LOC100736939	ncRNA			null	protein MROH8-like	1126.241195	4.984170155	7.81994679	0	up
LOC102159577	ncRNA	chr5:71058016-71059545	+		protein SDA1 homolog	51.2544384	0.166649592	8.264715347	5.55E-16	up
LOC102159577	ncRNA	chr5:71058016-71059545	+		protein SDA1 homolog	51.2544384	0.166649592	8.264715347	5.55E-16	up
LOC102159577	ncRNA	chr5:71058016-71059545	+		protein SDA1 homolog	51.2544384	0.166649592	8.264715347	5.55E-16	up
LOC102166253	ncRNA	chr18:52263865-52268351	-		40S ribosomal protein S8-like	11.48138176	0.055549864	7.691297185	4.26E-05	up
LOC102166253	ncRNA	chr18:52263865-52268351	-		40S ribosomal protein S8-like	11.48138176	0.055549864	7.691297185	4.26E-05	up
LOC102166253	ncRNA	chr18:52263865-52268351	-		40S ribosomal protein S8-like	11.48138176	0.055549864	7.691297185	4.26E-05	up
LOC100520669	ncRNA	chr3:98584603-98585146	-	ssc:100520669	60S ribosomal protein L32-like	236.8458878	0.269201279	9.781047643	0	up
LOC100520669	ncRNA	chr3:98584603-98585146	-	ssc:100520669	60S ribosomal protein L32-like	236.8458878	0.269201279	9.781047643	0	up
LOC100522844	ncRNA	chrx:64958729-64962950	-		suppressor of cytokine signaling 6-like	1013.268274	1.311963961	9.593072388	0	up
LOC100522844	ncRNA	chrx:64958729-64962950	-		suppressor of cytokine signaling 6-like	1013.268274	1.311963961	9.593072388	0	up
LOC100522844	ncRNA	chrx:64958729-64962950	-		suppressor of cytokine signaling 6-like	1013.268274	1.311963961	9.593072388	0	up
LOC102157784	ncRNA			null	putative NPIP-like protein LOC613037-like	197.508833	4.302004332	5.520764388	0	up
LOC102157784	ncRNA			null	putative NPIP-like protein LOC613037-like	197.508833	4.302004332	5.520764388	0	up
LOC102157784	ncRNA			null	putative NPIP-like protein LOC613037-like	197.508833	4.302004332	5.520764388	0	up
LOC100736911	ncRNA	chr4:34382731-34383312	-		60S ribosomal protein L12-like	149.7424094	0.484231592	8.272569952	0	up
LOC100736911	ncRNA	chr4:34382731-34383312	-		60S ribosomal protein L12-like	149.7424094	0.484231592	8.272569952	0	up
LOC100736911	ncRNA	chr4:34382731-34383312	-		60S ribosomal protein L12-like	149.7424094	0.484231592	8.272569952	0	up
LOC100517497	ncRNA	chr13:92417640-92419062	-		MOB kinase activator 1B pseudogene	28.24323023	0.159480449	7.468381723	8.39E-11	up
LOC100517497	ncRNA	chr13:92417640-92419062	-		MOB kinase activator 1B pseudogene	28.24323023	0.159480449	7.468381723	8.39E-11	up
LOC100517497	ncRNA	chr13:92417640-92419062	-		MOB kinase activator 1B pseudogene	28.24323023	0.159480449	7.468381723	8.39E-11	up
LOC102157755	ncRNA	chr5:29877941-29878812	-		40S ribosomal protein S15a-like	48.29931483	0	20	0	up
LOC102157755	ncRNA	chr5:29877941-29878812	-		40S ribosomal protein S15a-like	48.29931483	0	20	0	up
LOC102157755	ncRNA	chr5:29877941-29878812	-		40S ribosomal protein S15a-like	48.29931483	0	20	0	up
LOC100155135	ncRNA	chr14:54547858-54550166	+		beta-1,4-galactosyltransferase 4-like	16.76184848	0.152311305	6.782014415	2.79E-09	up
LOC100155135	ncRNA	chr14:54547858-54550166	+		beta-1,4-galactosyltransferase 4-like	16.76184848	0.152311305	6.782014415	2.79E-09	up
LOC100155135	ncRNA	chr14:54547858-54550166	+		beta-1,4-galactosyltransferase 4-like	16.76184848	0.152311305	6.782014415	2.79E-09	up
LOC102167146	ncRNA	chr9:77752148-77753080	-		nuclease-sensitive element-binding protein 1-like	31.44057705	0.318960897	6.623104318	3.67E-14	up
LOC102167146	ncRNA	chr9:77752148-77753080	-		nuclease-sensitive element-binding protein 1-like	31.44057705	0.318960897	6.623104318	3.67E-14	up
LOC102167146	ncRNA	chr9:77752148-77753080	-		nuclease-sensitive element-binding protein 1-like	31.44057705	0.318960897	6.623104318	3.67E-14	up
LOC102160989	ncRNA	chr13:203723396-203801072	-		60S ribosomal protein L6-like	21.99387054	0.572444993	5.263820637	6.52E-08	up
LOC102160989	ncRNA	chr13:203723396-203801072	-		60S ribosomal protein L6-like	21.99387054	0.572444993	5.263820637	6.52E-08	up
LOC102160989	ncRNA	chr13:203723396-203801072	-		60S ribosomal protein L6-like	21.99387054	0.572444993	5.263820637	6.52E-08	up
LOC102160989	ncRNA	chr13:203723396-203801072	-		60S ribosomal protein L6-like	21.99387054	0.572444993	5.263820637	6.52E-08	up
LOC102159521	ncRNA	chr14:14203154-14204643	+		mitochondrial import inner membrane translocase subunit Tim23-like	45.05352336	0.055549864	9.663640842	0	up
LOC102159521	ncRNA	chr14:14203154-14204643	+		mitochondrial import inner membrane translocase subunit Tim23-like	45.05352336	0.055549864	9.663640842	0	up
LOC102159521	ncRNA	chr14:14203154-14204643	+		mitochondrial import inner membrane translocase subunit Tim23-like	45.05352336	0.055549864	9.663640842	0	up
LOC102161838	ncRNA	chr8:42841881-42848775	+		peroxiredoxin-2-like	95.43595808	0.38747015	7.94430396	0	up
LOC102161838	ncRNA	chr8:42841881-42848775	+		peroxiredoxin-2-like	95.43595808	0.38747015	7.94430396	0	up
LOC102161838	ncRNA	chr8:42841881-42848775	+		peroxiredoxin-2-like	95.43595808	0.38747015	7.94430396	0	up
LOC102158674	ncRNA			null	ribosomal protein L17 pseudogene	23.05965282	0.048380721	8.896722814	1.61E-14	up
LOC102158674	ncRNA			null	ribosomal protein L17 pseudogene	23.05965282	0.048380721	8.896722814	1.61E-14	up
LOC102158674	ncRNA			null	ribosomal protein L17 pseudogene	23.05965282	0.048380721	8.896722814	1.61E-14	up
LOC100739145	ncRNA			null	cytochrome c oxidase subunit 6B1-like	134.482345	0.971495634	7.112993558	0	up
LOC100739145	ncRNA			null	cytochrome c oxidase subunit 6B1-like	134.482345	0.971495634	7.112993558	0	up
LOC100739145	ncRNA			null	cytochrome c oxidase subunit 6B1-like	134.482345	0.971495634	7.112993558	0	up
LOC100513913	ncRNA	chr2:83943618-83947179	-		DNA-(apurinic or apyrimidinic site) lyase-like	142.621046	0.444398911	8.326115892	0	up
LOC100513913	ncRNA	chr2:83943618-83947179	-		DNA-(apurinic or apyrimidinic site) lyase-like	142.621046	0.444398911	8.326115892	0	up
LOC100513913	ncRNA	chr2:83943618-83947179	-		DNA-(apurinic or apyrimidinic site) lyase-like	142.621046	0.444398911	8.326115892	0	up
LOC100522416	ncRNA	chrx:105087533-105129311	+	ssc:100522416	retinal guanylyl cyclase 2-like	7.315141965	0.32613004	4.487366622	0.010606701	up
LOC100522416	ncRNA	chrx:105087533-105129311	+	ssc:100522416	retinal guanylyl cyclase 2-like	7.315141965	0.32613004	4.487366622	0.010606701	up
LOC100522416	ncRNA	chrx:105087533-105129311	+	ssc:100522416	retinal guanylyl cyclase 2-like	7.315141965	0.32613004	4.487366622	0.010606701	up
LOC102159515	ncRNA	chr13:33924179-33926590	+	ssc:102159515	60S ribosomal protein L31-like	69.37273704	0.25624189	8.080718651	0	up
LOC102159515	ncRNA	chr13:33924179-33926590	+	ssc:102159515	60S ribosomal protein L31-like	69.37273704	0.25624189	8.080718651	0	up
LOC100738264	ncRNA	chr7:20608473-20613480	+		voltage-dependent calcium channel gamma-like subunit-like	10.41559949	0.159480449	6.029222499	0.004444407	up
LOC100738264	ncRNA	chr7:20608473-20613480	+		voltage-dependent calcium channel gamma-like subunit-like	10.41559949	0.159480449	6.029222499	0.004444407	up
LOC100738264	ncRNA	chr7:20608473-20613480	+		voltage-dependent calcium channel gamma-like subunit-like	10.41559949	0.159480449	6.029222499	0.004444407	up
LOC100738264	ncRNA	chr7:20608473-20613480	+		voltage-dependent calcium channel gamma-like subunit-like	10.41559949	0.159480449	6.029222499	0.004444407	up
LOC100739595	ncRNA	chr5:36416282-36417008	+		E3 ubiquitin-protein ligase MARCH6-like	82.6465708	0.478441346	7.43246908	0	up
LOC100739595	ncRNA	chr5:36416282-36417008	+		E3 ubiquitin-protein ligase MARCH6-like	82.6465708	0.478441346	7.43246908	0	up
LOC100739595	ncRNA	chr5:36416282-36417008	+		E3 ubiquitin-protein ligase MARCH6-like	82.6465708	0.478441346	7.43246908	0	up
LOC100520689	ncRNA	chr10:47223931-47224886	+		ferritin, light polypeptide pseudogene	14.63028393	0.096761442	7.24030979	2.68E-06	up
LOC100520689	ncRNA	chr10:47223931-47224886	+		ferritin, light polypeptide pseudogene	14.63028393	0.096761442	7.24030979	2.68E-06	up
LOC100520689	ncRNA	chr10:47223931-47224886	+		ferritin, light polypeptide pseudogene	14.63028393	0.096761442	7.24030979	2.68E-06	up
LOC100517066	ncRNA	chr18:10923514-10924183	+		high mobility group nucleosome binding domain 1 pseudogene	10.46404413	0.222199456	5.557441438	5.88E-05	up
LOC100517066	ncRNA	chr18:10923514-10924183	+		high mobility group nucleosome binding domain 1 pseudogene	10.46404413	0.222199456	5.557441438	5.88E-05	up
LOC100517066	ncRNA	chr18:10923514-10924183	+		high mobility group nucleosome binding domain 1 pseudogene	10.46404413	0.222199456	5.557441438	5.88E-05	up
LOC102165689	ncRNA			null	uncharacterized LOC102165689	171.7847245	6.493749709	4.725406165	1.46E-12	up
LOC102165689	ncRNA			null	uncharacterized LOC102165689	171.7847245	6.493749709	4.725406165	1.46E-12	up
LOC102165689	ncRNA			null	uncharacterized LOC102165689	171.7847245	6.493749709	4.725406165	1.46E-12	up
LOC100737273	ncRNA	chr3:100941060-100941837	+		nuclear transport factor 2-like	43.93929644	0	20	0	up
LOC100737273	ncRNA	chr3:100941060-100941837	+		nuclear transport factor 2-like	43.93929644	0	20	0	up
LOC100737273	ncRNA	chr3:100941060-100941837	+		nuclear transport factor 2-like	43.93929644	0	20	0	up
LOC102166525	ncRNA			null	signal recognition particle 9kDa pseudogene	14.63028393	0	20	0.043926208	up
LOC102166525	ncRNA			null	signal recognition particle 9kDa pseudogene	14.63028393	0	20	0.043926208	up
LOC102166525	ncRNA			null	signal recognition particle 9kDa pseudogene	14.63028393	0	20	0.043926208	up
LOC102166525	ncRNA			null	signal recognition particle 9kDa pseudogene	14.63028393	0	20	0.043926208	up
LOC102164349	ncRNA	chr2:17379589-17380660	-		GTP-binding protein 10-like	51.39977235	0.055549864	9.853762877	0	up
LOC102164349	ncRNA	chr2:17379589-17380660	-		GTP-binding protein 10-like	51.39977235	0.055549864	9.853762877	0	up
LOC102164349	ncRNA	chr2:17379589-17380660	-		GTP-binding protein 10-like	51.39977235	0.055549864	9.853762877	0	up
LOC102167852	ncRNA	chr1:255051333-255055215	-		uncharacterized LOC102167852	47.2819772	0.109720831	8.751309108	0	up
LOC102167852	ncRNA	chr1:255051333-255055215	-		uncharacterized LOC102167852	47.2819772	0.109720831	8.751309108	0	up
LOC102167852	ncRNA	chr1:255051333-255055215	-		uncharacterized LOC102167852	47.2819772	0.109720831	8.751309108	0	up
LOC102167843	ncRNA	chr2:88646706-88652578	+		40S ribosomal protein SA-like	69.1305138	0.249072747	8.116611665	0	up
LOC102167843	ncRNA	chr2:88646706-88652578	+		40S ribosomal protein SA-like	69.1305138	0.249072747	8.116611665	0	up
LOC102167843	ncRNA	chr2:88646706-88652578	+		40S ribosomal protein SA-like	69.1305138	0.249072747	8.116611665	0	up
LOC100739433	ncRNA			null	uncharacterized LOC100739433	45.10196801	0.166649592	8.080228793	0	up
LOC100739433	ncRNA			null	uncharacterized LOC100739433	45.10196801	0.166649592	8.080228793	0	up
LOC100739433	ncRNA			null	uncharacterized LOC100739433	45.10196801	0.166649592	8.080228793	0	up
LOC100513614	ncRNA	chr10:18129098-18129745	-		mitochondrial pyruvate carrier 2 pseudogene	13.6129463	0.055549864	7.936980256	1.64E-08	up
LOC100513614	ncRNA	chr10:18129098-18129745	-		mitochondrial pyruvate carrier 2 pseudogene	13.6129463	0.055549864	7.936980256	1.64E-08	up
LOC100513614	ncRNA	chr10:18129098-18129745	-		mitochondrial pyruvate carrier 2 pseudogene	13.6129463	0.055549864	7.936980256	1.64E-08	up
LOC100624550	ncRNA	chr1:305352886-305355188	-		ribosomal protein L5 pseudogene	73.39364289	0.274991525	8.06012414	0	up
LOC100624550	ncRNA	chr1:305352886-305355188	-		ribosomal protein L5 pseudogene	73.39364289	0.274991525	8.06012414	0	up
LOC100624550	ncRNA	chr1:305352886-305355188	-		ribosomal protein L5 pseudogene	73.39364289	0.274991525	8.06012414	0	up
LOC100521276	ncRNA	chr6:95379539-95388935	-	ssc:100521276	transmembrane protein 183-like	31.3921324	0.381679904	6.361895992	3.28E-10	up
LOC100521276	ncRNA	chr6:95379539-95388935	-	ssc:100521276	transmembrane protein 183-like	31.3921324	0.381679904	6.361895992	3.28E-10	up
LOC102166572	ncRNA	chr4:21861012-21861906	-		ribosomal protein S2e pseudogene	114.5231497	1.035593539	6.789037574	0	up
LOC102166572	ncRNA	chr4:21861012-21861906	-		ribosomal protein S2e pseudogene	114.5231497	1.035593539	6.789037574	0	up
LOC102166572	ncRNA	chr4:21861012-21861906	-		ribosomal protein S2e pseudogene	114.5231497	1.035593539	6.789037574	0	up
LOC100511462	ncRNA	chr8:32468533-32475371	+		uncharacterized LOC100511462	607.5443402	1.512655987	8.649761971	0	up
LOC100511462	ncRNA	chr8:32468533-32475371	+		uncharacterized LOC100511462	607.5443402	1.512655987	8.649761971	0	up
LOC100511462	ncRNA	chr8:32468533-32475371	+		uncharacterized LOC100511462	607.5443402	1.512655987	8.649761971	0	up
LOC100738575	ncRNA	chr9:81576633-81580386	+		prothymosin alpha-like	17.82763075	0.055549864	8.326115892	6.13E-13	up
LOC100738575	ncRNA	chr9:81576633-81580386	+		prothymosin alpha-like	17.82763075	0.055549864	8.326115892	6.13E-13	up
LOC100738575	ncRNA	chr9:81576633-81580386	+		prothymosin alpha-like	17.82763075	0.055549864	8.326115892	6.13E-13	up
LOC102158930	ncRNA	chrx:98130300-98131501	-		AMMECR1-like protein-like	122.6618507	0.215030313	9.155930859	0	up
LOC102158930	ncRNA	chrx:98130300-98131501	-		AMMECR1-like protein-like	122.6618507	0.215030313	9.155930859	0	up
LOC102158930	ncRNA	chrx:98130300-98131501	-		AMMECR1-like protein-like	122.6618507	0.215030313	9.155930859	0	up
LOC102165214	ncRNA			null	sushi repeat-containing protein SRPX-like	53.62822619	0.220820558	7.923974232	0	up
LOC102165214	ncRNA			null	sushi repeat-containing protein SRPX-like	53.62822619	0.220820558	7.923974232	0	up
LOC102165214	ncRNA			null	sushi repeat-containing protein SRPX-like	53.62822619	0.220820558	7.923974232	0	up
LOC102164362	ncRNA	chr15:36650914-36670110	-		glycine cleavage system H protein, mitochondrial-like	47.2819772	0.25624189	7.527640211	0	up
LOC102164362	ncRNA	chr15:36650914-36670110	-		glycine cleavage system H protein, mitochondrial-like	47.2819772	0.25624189	7.527640211	0	up
LOC102164362	ncRNA	chr15:36650914-36670110	-		glycine cleavage system H protein, mitochondrial-like	47.2819772	0.25624189	7.527640211	0	up
LOC100522117	ncRNA	chr1:276568106-276569742	-		heterogeneous nuclear ribonucleoprotein A1 pseudogene	24.07699044	0.152311305	7.304488229	7.92E-11	up
LOC100522117	ncRNA	chr1:276568106-276569742	-		heterogeneous nuclear ribonucleoprotein A1 pseudogene	24.07699044	0.152311305	7.304488229	7.92E-11	up
LOC100522117	ncRNA	chr1:276568106-276569742	-		heterogeneous nuclear ribonucleoprotein A1 pseudogene	24.07699044	0.152311305	7.304488229	7.92E-11	up
LOC100524776	ncRNA	chr18:16437104-16437934	+		ribosomal protein S25 pseudogene	15.7929555	0.103930585	7.2475171	1.76E-04	up
LOC100524776	ncRNA	chr18:16437104-16437934	+		ribosomal protein S25 pseudogene	15.7929555	0.103930585	7.2475171	1.76E-04	up
LOC100524776	ncRNA	chr18:16437104-16437934	+		ribosomal protein S25 pseudogene	15.7929555	0.103930585	7.2475171	1.76E-04	up
LOC100525628	ncRNA	chr1:224773265-224775682	+		interferon omega-1-like	19.91075065	0.109720831	7.503566355	8.22E-12	up
LOC100525628	ncRNA	chr1:224773265-224775682	+		interferon omega-1-like	19.91075065	0.109720831	7.503566355	8.22E-12	up
LOC100525628	ncRNA	chr1:224773265-224775682	+		interferon omega-1-like	19.91075065	0.109720831	7.503566355	8.22E-12	up
LOC100737672	ncRNA	chr11:67359526-67373990	-		cytochrome c-like	11.48138176	0.048380721	7.8906483	4.29E-05	up
LOC100737672	ncRNA	chr11:67359526-67373990	-		cytochrome c-like	11.48138176	0.048380721	7.8906483	4.29E-05	up
LOC100737672	ncRNA	chr11:67359526-67373990	-		cytochrome c-like	11.48138176	0.048380721	7.8906483	4.29E-05	up
LOC102158073	ncRNA	chr5:82924452-82928704	-		cytochrome c oxidase subunit 7B, mitochondrial-like	20.05608459	0	20	4.78E-12	up
LOC102158073	ncRNA	chr5:82924452-82928704	-		cytochrome c oxidase subunit 7B, mitochondrial-like	20.05608459	0	20	4.78E-12	up
LOC102158073	ncRNA	chr5:82924452-82928704	-		cytochrome c oxidase subunit 7B, mitochondrial-like	20.05608459	0	20	4.78E-12	up
LOC100157924	ncRNA			null	39S ribosomal protein L54, mitochondrial-like	17.82763075	0.103930585	7.422350902	3.67E-12	up
LOC100157924	ncRNA			null	39S ribosomal protein L54, mitochondrial-like	17.82763075	0.103930585	7.422350902	3.67E-12	up
LOC100157924	ncRNA			null	39S ribosomal protein L54, mitochondrial-like	17.82763075	0.103930585	7.422350902	3.67E-12	up
LOC100516704	ncRNA	chr16:23318487-23319749	-		5'-nucleotidase, cytosolic IIIA pseudogene	119.5613932	0.263411033	8.826220122	0	up
LOC100516704	ncRNA	chr16:23318487-23319749	-		5'-nucleotidase, cytosolic IIIA pseudogene	119.5613932	0.263411033	8.826220122	0	up
LOC100516704	ncRNA	chr16:23318487-23319749	-		5'-nucleotidase, cytosolic IIIA pseudogene	119.5613932	0.263411033	8.826220122	0	up
LOC100739865	ncRNA			null	heterogeneous nuclear ribonucleoprotein A3-like	466.8610802	7.282198711	6.002475405	0	up
LOC100739865	ncRNA			null	heterogeneous nuclear ribonucleoprotein A3-like	466.8610802	7.282198711	6.002475405	0	up
LOC100739865	ncRNA			null	heterogeneous nuclear ribonucleoprotein A3-like	466.8610802	7.282198711	6.002475405	0	up
LOC102160382	ncRNA	chr13:155820407-155822571	-		heterogeneous nuclear ribonucleoprotein A3 pseudogene	77.36610409	0.215030313	8.491017767	0	up
LOC102160382	ncRNA	chr13:155820407-155822571	-		heterogeneous nuclear ribonucleoprotein A3 pseudogene	77.36610409	0.215030313	8.491017767	0	up
LOC102160382	ncRNA	chr13:155820407-155822571	-		heterogeneous nuclear ribonucleoprotein A3 pseudogene	77.36610409	0.215030313	8.491017767	0	up
LOC100153575	ncRNA	chr1:283869838-283871630	+		tetratricopeptide repeat protein 1-like	33.5721416	0.048380721	9.438616593	0	up
LOC100153575	ncRNA	chr1:283869838-283871630	+		tetratricopeptide repeat protein 1-like	33.5721416	0.048380721	9.438616593	0	up
LOC100153575	ncRNA	chr1:283869838-283871630	+		tetratricopeptide repeat protein 1-like	33.5721416	0.048380721	9.438616593	0	up
LOC100515881	ncRNA	chr2:93901737-93915059	-		40S ribosomal protein S15-like	34.54103457	0.274991525	6.972780328	1.58E-12	up
LOC100515881	ncRNA	chr2:93901737-93915059	-		40S ribosomal protein S15-like	34.54103457	0.274991525	6.972780328	1.58E-12	up
LOC100515881	ncRNA	chr2:93901737-93915059	-		40S ribosomal protein S15-like	34.54103457	0.274991525	6.972780328	1.58E-12	up
LOC100157942	ncRNA			null	actin-related protein 2/3 complex subunit 3-like	223.9596113	1.918601116	6.86703997	0	up
LOC100157942	ncRNA			null	actin-related protein 2/3 complex subunit 3-like	223.9596113	1.918601116	6.86703997	0	up
LOC100157942	ncRNA			null	actin-related protein 2/3 complex subunit 3-like	223.9596113	1.918601116	6.86703997	0	up
LOC102162549	ncRNA	chr6:55973782-55976121	-		solute carrier family 25 member 36-like	47.08819861	7.175741006	2.714165807	0.024906125	up
LOC102162549	ncRNA	chr6:55973782-55976121	-		solute carrier family 25 member 36-like	47.08819861	7.175741006	2.714165807	0.024906125	up
LOC102162549	ncRNA	chr6:55973782-55976121	-		solute carrier family 25 member 36-like	47.08819861	7.175741006	2.714165807	0.024906125	up
LOC100153586	ncRNA			ssc:100153586	tRNA selenocysteine 1-associated protein 1-like	198.5746153	1.512655987	7.036453475	0	up
LOC100153586	ncRNA			ssc:100153586	tRNA selenocysteine 1-associated protein 1-like	198.5746153	1.512655987	7.036453475	0	up
LOC100153586	ncRNA			ssc:100153586	tRNA selenocysteine 1-associated protein 1-like	198.5746153	1.512655987	7.036453475	0	up
LOC100154433	ncRNA	chr1:299710650-299712711	-		5'-AMP-activated protein kinase subunit gamma-1-like	39.86994594	0.377543212	6.722516059	0	up
LOC100154433	ncRNA	chr1:299710650-299712711	-		5'-AMP-activated protein kinase subunit gamma-1-like	39.86994594	0.377543212	6.722516059	0	up
LOC100154433	ncRNA	chr1:299710650-299712711	-		5'-AMP-activated protein kinase subunit gamma-1-like	39.86994594	0.377543212	6.722516059	0	up
LOC100739811	ncRNA	chr6:79244287-79245306	-		general transcription factor IIE subunit 1-like	66.99894925	1.140903021	5.8758904	1.52E-13	up
LOC100739811	ncRNA	chr6:79244287-79245306	-		general transcription factor IIE subunit 1-like	66.99894925	1.140903021	5.8758904	1.52E-13	up
LOC100739811	ncRNA	chr6:79244287-79245306	-		general transcription factor IIE subunit 1-like	66.99894925	1.140903021	5.8758904	1.52E-13	up
LOC100511067	ncRNA	chr2:67674568-67675185	-		glycine cleavage system H protein, mitochondrial-like	12.54716403	0.103930585	6.915597233	4.75E-06	up
LOC100511067	ncRNA	chr2:67674568-67675185	-		glycine cleavage system H protein, mitochondrial-like	12.54716403	0.103930585	6.915597233	4.75E-06	up
LOC100511067	ncRNA	chr2:67674568-67675185	-		glycine cleavage system H protein, mitochondrial-like	12.54716403	0.103930585	6.915597233	4.75E-06	up
LOC102167813	ncRNA			null	vomeronasal type-2 receptor 26-like	28.34011953	0.111099728	7.99484675	0	up
LOC102167813	ncRNA			null	vomeronasal type-2 receptor 26-like	28.34011953	0.111099728	7.99484675	0	up
LOC102167813	ncRNA			null	vomeronasal type-2 receptor 26-like	28.34011953	0.111099728	7.99484675	0	up
LOC102161278	ncRNA	chr8:130429802-130434108	+		DNA (cytosine-5)-methyltransferase 1-like	11.48138176	0.623583508	4.202569694	0.017203891	up
LOC102161278	ncRNA	chr8:130429802-130434108	+		DNA (cytosine-5)-methyltransferase 1-like	11.48138176	0.623583508	4.202569694	0.017203891	up
LOC102161278	ncRNA	chr8:130429802-130434108	+		DNA (cytosine-5)-methyltransferase 1-like	11.48138176	0.623583508	4.202569694	0.017203891	up
LOC100516749	ncRNA	chr9:78771230-78772366	-		YKT6 v-SNARE homolog (S. cerevisiae) pseudogene	42.97040346	0.111099728	8.59534423	0	up
LOC100516749	ncRNA	chr9:78771230-78772366	-		YKT6 v-SNARE homolog (S. cerevisiae) pseudogene	42.97040346	0.111099728	8.59534423	0	up
LOC100516749	ncRNA	chr9:78771230-78772366	-		YKT6 v-SNARE homolog (S. cerevisiae) pseudogene	42.97040346	0.111099728	8.59534423	0	up
LOC100523061	ncRNA	chr5:22013600-22018491	+		olfactory receptor 6C68-like	35.75215079	0.388849047	6.52267602	0	up
LOC100523061	ncRNA	chr5:22013600-22018491	+		olfactory receptor 6C68-like	35.75215079	0.388849047	6.52267602	0	up
LOC100523061	ncRNA	chr5:22013600-22018491	+		olfactory receptor 6C68-like	35.75215079	0.388849047	6.52267602	0	up
SLA-DRB5	ncRNA	chr7:29358820-29366946	-		MHC class II, DR beta-like 5 pseudogene	10.46404413	0.414343441	4.658469635	5.04E-04	up
SLA-DRB5	ncRNA	chr7:29358820-29366946	-		MHC class II, DR beta-like 5 pseudogene	10.46404413	0.414343441	4.658469635	5.04E-04	up
SLA-DRB5	ncRNA	chr7:29358820-29366946	-		MHC class II, DR beta-like 5 pseudogene	10.46404413	0.414343441	4.658469635	5.04E-04	up
SLA-DRB4	ncRNA	chr7:29057440-29068004	-		MHC class II, DR beta-like 4 pseudogene	112.1493619	5.711490538	4.295410304	1.39E-11	up
SLA-DRB4	ncRNA	chr7:29057440-29068004	-		MHC class II, DR beta-like 4 pseudogene	112.1493619	5.711490538	4.295410304	1.39E-11	up
SLA-DRB4	ncRNA	chr7:29057440-29068004	-		MHC class II, DR beta-like 4 pseudogene	112.1493619	5.711490538	4.295410304	1.39E-11	up
LOC102162104	ncRNA	chrx:41031472-41032264	-		60S ribosomal protein L35a-like	13.6129463	0.055549864	7.936980256	1.64E-08	up
LOC102162104	ncRNA	chrx:41031472-41032264	-		60S ribosomal protein L35a-like	13.6129463	0.055549864	7.936980256	1.64E-08	up
LOC102162104	ncRNA	chrx:41031472-41032264	-		60S ribosomal protein L35a-like	13.6129463	0.055549864	7.936980256	1.64E-08	up
LOC100736776	ncRNA	chr3:23596194-23603919	+		T-complex protein 1 subunit zeta-like	14.72717323	0.159480449	6.528957163	0.016227676	up
LOC100736776	ncRNA	chr3:23596194-23603919	+		T-complex protein 1 subunit zeta-like	14.72717323	0.159480449	6.528957163	0.016227676	up
LOC100736776	ncRNA	chr3:23596194-23603919	+		T-complex protein 1 subunit zeta-like	14.72717323	0.159480449	6.528957163	0.016227676	up
LOC100738954	ncRNA			null	zinc finger transcription factor Trps1-like	15.74451085	77.36502101	-2.296832493	0.049021385	down
LOC100738954	ncRNA			null	zinc finger transcription factor Trps1-like	15.74451085	77.36502101	-2.296832493	0.049021385	down
LOC100738954	ncRNA			null	zinc finger transcription factor Trps1-like	15.74451085	77.36502101	-2.296832493	0.049021385	down
LOC100738954	ncRNA			null	zinc finger transcription factor Trps1-like	15.74451085	77.36502101	-2.296832493	0.049021385	down
LOC100151775	ncRNA	chr1:122630877-122631499	-		ubiquitin-fold modifier conjugating enzyme 1 pseudogene	66.12694557	0.215030313	8.264554405	0	up
LOC100151775	ncRNA	chr1:122630877-122631499	-		ubiquitin-fold modifier conjugating enzyme 1 pseudogene	66.12694557	0.215030313	8.264554405	0	up
LOC100151775	ncRNA	chr1:122630877-122631499	-		ubiquitin-fold modifier conjugating enzyme 1 pseudogene	66.12694557	0.215030313	8.264554405	0	up
LOC100526008	ncRNA	chr10:64653903-64654563	-		60S ribosomal protein L10-like	68.11317617	0.048380721	10.45928593	0	up
LOC100526008	ncRNA	chr10:64653903-64654563	-		60S ribosomal protein L10-like	68.11317617	0.048380721	10.45928593	0	up
LOC100526008	ncRNA	chr10:64653903-64654563	-		60S ribosomal protein L10-like	68.11317617	0.048380721	10.45928593	0	up
LOC100520705	ncRNA	chr1:63646213-63646750	+		ribosomal protein L17 pseudogene	23.10809746	0	20	5.48E-12	up
LOC100520705	ncRNA	chr1:63646213-63646750	+		ribosomal protein L17 pseudogene	23.10809746	0	20	5.48E-12	up
LOC100520705	ncRNA	chr1:63646213-63646750	+		ribosomal protein L17 pseudogene	23.10809746	0	20	5.48E-12	up
LOC102158581	ncRNA	chr1:86158901-86159535	-	ssc:102158581	gamma-aminobutyric acid receptor-associated protein-like	28.19478559	0.103930585	8.083664289	5.50E-09	up
LOC102158581	ncRNA	chr1:86158901-86159535	-	ssc:102158581	gamma-aminobutyric acid receptor-associated protein-like	28.19478559	0.103930585	8.083664289	5.50E-09	up
LOC100518879	ncRNA			null	40S ribosomal protein S27-like	28.38856418	0	20	0	up
LOC100518879	ncRNA			null	40S ribosomal protein S27-like	28.38856418	0	20	0	up
LOC100518879	ncRNA			null	40S ribosomal protein S27-like	28.38856418	0	20	0	up
LOC102166187	ncRNA			null	mitochondrial assembly of ribosomal large subunit protein 1-like	14.63028393	0.111099728	7.040958675	2.65E-06	up
LOC102166187	ncRNA			null	mitochondrial assembly of ribosomal large subunit protein 1-like	14.63028393	0.111099728	7.040958675	2.65E-06	up
LOC102166187	ncRNA			null	mitochondrial assembly of ribosomal large subunit protein 1-like	14.63028393	0.111099728	7.040958675	2.65E-06	up
LOC102167036	ncRNA			null	uncharacterized LOC102167036	196.3461615	1.31637531	7.220684711	0	up
LOC102167036	ncRNA			null	uncharacterized LOC102167036	196.3461615	1.31637531	7.220684711	0	up
LOC102167036	ncRNA			null	uncharacterized LOC102167036	196.3461615	1.31637531	7.220684711	0	up
LOC100156194	ncRNA	chr1:86131016-86133468	-		mitogen-activated protein kinase 6-like	199.4950636	0.42730283	8.86687846	0	up
LOC100156194	ncRNA	chr1:86131016-86133468	-		mitogen-activated protein kinase 6-like	199.4950636	0.42730283	8.86687846	0	up
LOC100156194	ncRNA	chr1:86131016-86133468	-		mitogen-activated protein kinase 6-like	199.4950636	0.42730283	8.86687846	0	up
LOC102160471	ncRNA	chr8:121020721-121020997	-		40S ribosomal protein S3a-like	68.16162082	0.111099728	9.260960549	0	up
LOC102160471	ncRNA	chr8:121020721-121020997	-		40S ribosomal protein S3a-like	68.16162082	0.111099728	9.260960549	0	up
LOC102160471	ncRNA	chr8:121020721-121020997	-		40S ribosomal protein S3a-like	68.16162082	0.111099728	9.260960549	0	up
LOC102163980	ncRNA	chr2:124460332-124461515	+		adenylate kinase 3 pseudogene	559.0028022	28.08143833	4.315166777	0	up
LOC102163980	ncRNA	chr2:124460332-124461515	+		adenylate kinase 3 pseudogene	559.0028022	28.08143833	4.315166777	0	up
LOC102163980	ncRNA	chr2:124460332-124461515	+		adenylate kinase 3 pseudogene	559.0028022	28.08143833	4.315166777	0	up
LOC102158158	ncRNA	chr10:49757512-49765193	-	ssc:102158158	uncharacterized LOC102158158	23.15654211	0	20	1.97E-13	up
LOC102158158	ncRNA	chr10:49757512-49765193	-	ssc:102158158	uncharacterized LOC102158158	23.15654211	0	20	1.97E-13	up
LOC102158158	ncRNA	chr10:49757512-49765193	-	ssc:102158158	uncharacterized LOC102158158	23.15654211	0	20	1.97E-13	up
LOC102158158	ncRNA	chr10:49757512-49765193	-	ssc:102158158	uncharacterized LOC102158158	23.15654211	0	20	1.97E-13	up
LOC102161305	ncRNA			null	tigger transposable element-derived protein 1-like	115.2982641	0.311791754	8.530572303	0	up
LOC102161305	ncRNA			null	tigger transposable element-derived protein 1-like	115.2982641	0.311791754	8.530572303	0	up
LOC102161305	ncRNA			null	tigger transposable element-derived protein 1-like	115.2982641	0.311791754	8.530572303	0	up
LOC100522905	ncRNA	chr15:154126671-154127910	+		RAB28, member RAS oncogene family pseudogene	14.67872858	0.103930585	7.141962929	6.13E-10	up
LOC100522905	ncRNA	chr15:154126671-154127910	+		RAB28, member RAS oncogene family pseudogene	14.67872858	0.103930585	7.141962929	6.13E-10	up
LOC100522905	ncRNA	chr15:154126671-154127910	+		RAB28, member RAS oncogene family pseudogene	14.67872858	0.103930585	7.141962929	6.13E-10	up
LOC100522905	ncRNA	chr15:154126671-154127910	+		RAB28, member RAS oncogene family pseudogene	14.67872858	0.103930585	7.141962929	6.13E-10	up
LOC100516278	ncRNA			null	plectin-like	36.72104377	2.955548753	3.635109143	3.34E-09	up
LOC100516278	ncRNA			null	plectin-like	36.72104377	2.955548753	3.635109143	3.34E-09	up
LOC100516278	ncRNA			null	plectin-like	36.72104377	2.955548753	3.635109143	3.34E-09	up
LOC102160822	ncRNA	chr1:134629413-134630340	-		60S ribosomal protein L7a-like	159.4313391	0.434471974	8.519456413	0	up
LOC102160822	ncRNA	chr1:134629413-134630340	-		60S ribosomal protein L7a-like	159.4313391	0.434471974	8.519456413	0	up
LOC102160822	ncRNA	chr1:134629413-134630340	-		60S ribosomal protein L7a-like	159.4313391	0.434471974	8.519456413	0	up
LOC102163097	ncRNA	chr2:52610297-52611451	-		presenilin enhancer gamma secretase subunit pseudogene	64.14071497	0.048380721	10.37259246	0	up
LOC102163097	ncRNA	chr2:52610297-52611451	-		presenilin enhancer gamma secretase subunit pseudogene	64.14071497	0.048380721	10.37259246	0	up
LOC102163097	ncRNA	chr2:52610297-52611451	-		presenilin enhancer gamma secretase subunit pseudogene	64.14071497	0.048380721	10.37259246	0	up
LOC100522972	ncRNA			null	interferon omega-1-like	154.8290975	1.21520252	6.99333605	0	up
LOC100522972	ncRNA			null	interferon omega-1-like	154.8290975	1.21520252	6.99333605	0	up
LOC100522972	ncRNA			null	interferon omega-1-like	154.8290975	1.21520252	6.99333605	0	up
LOC102160800	ncRNA			null	uncharacterized LOC102160800	100.4742016	3.025842104	5.053344596	1.97E-10	up
LOC102160800	ncRNA			null	uncharacterized LOC102160800	100.4742016	3.025842104	5.053344596	1.97E-10	up
LOC102160800	ncRNA			null	uncharacterized LOC102160800	100.4742016	3.025842104	5.053344596	1.97E-10	up
LOC100623192	ncRNA	chr9:127458951-127459775	+		zinc finger protein 330-like	28.34011953	0.103930585	8.09108176	0	up
LOC100623192	ncRNA	chr9:127458951-127459775	+		zinc finger protein 330-like	28.34011953	0.103930585	8.09108176	0	up
LOC100623192	ncRNA	chr9:127458951-127459775	+		zinc finger protein 330-like	28.34011953	0.103930585	8.09108176	0	up
LOC100623190	ncRNA	chr9:102426300-102470659	+		multidrug resistance protein 1-like	99.06930674	0.200692026	8.947311049	0	up
LOC100623190	ncRNA	chr9:102426300-102470659	+		multidrug resistance protein 1-like	99.06930674	0.200692026	8.947311049	0	up
LOC100623190	ncRNA	chr9:102426300-102470659	+		multidrug resistance protein 1-like	99.06930674	0.200692026	8.947311049	0	up
LOC102165256	ncRNA	chr7:20421533-20423014	-	ssc:102165256	V-type proton ATPase subunit G 1-like	36.81793307	0.048380721	9.57176066	0	up
LOC102165256	ncRNA	chr7:20421533-20423014	-	ssc:102165256	V-type proton ATPase subunit G 1-like	36.81793307	0.048380721	9.57176066	0	up
LOC100517136	ncRNA	chr1:202460457-202460799	+		NADH dehydrogenase (ubiquinone) 1 beta subcomplex, 3, 12kDa pseudogene	3.197346819	0.048380721	6.046299171	0.004289744	up
LOC100517136	ncRNA	chr1:202460457-202460799	+		NADH dehydrogenase (ubiquinone) 1 beta subcomplex, 3, 12kDa pseudogene	3.197346819	0.048380721	6.046299171	0.004289744	up
LOC100517136	ncRNA	chr1:202460457-202460799	+		NADH dehydrogenase (ubiquinone) 1 beta subcomplex, 3, 12kDa pseudogene	3.197346819	0.048380721	6.046299171	0.004289744	up
LOC100620901	ncRNA	chr8:59017149-59018330	-		M-phase-specific PLK1-interacting protein-like	20.92808827	0.152311305	7.10227369	3.57E-09	up
LOC100620901	ncRNA	chr8:59017149-59018330	-		M-phase-specific PLK1-interacting protein-like	20.92808827	0.152311305	7.10227369	3.57E-09	up
LOC100620901	ncRNA	chr8:59017149-59018330	-		M-phase-specific PLK1-interacting protein-like	20.92808827	0.152311305	7.10227369	3.57E-09	up
LOC100524718	ncRNA	chr16:74163779-74165141	+		spermine synthase-like	35.6552615	0.096761442	8.525467007	0	up
LOC100524718	ncRNA	chr16:74163779-74165141	+		spermine synthase-like	35.6552615	0.096761442	8.525467007	0	up
LOC100524718	ncRNA	chr16:74163779-74165141	+		spermine synthase-like	35.6552615	0.096761442	8.525467007	0	up
LOC100626679	ncRNA	chr1:263613325-263614226	-		40S ribosomal protein SA-like	73.97497867	255.2032843	-1.786537615	6.35E-13	down
LOC100626679	ncRNA	chr1:263613325-263614226	-		40S ribosomal protein SA-like	73.97497867	255.2032843	-1.786537615	6.35E-13	down
LOC100626679	ncRNA	chr1:263613325-263614226	-		40S ribosomal protein SA-like	73.97497867	255.2032843	-1.786537615	6.35E-13	down
LOC100521687	ncRNA			null	40S ribosomal protein S20-like	217.2258051	0.62964841	8.430433315	0	up
LOC100521687	ncRNA			null	40S ribosomal protein S20-like	217.2258051	0.62964841	8.430433315	0	up
LOC100521687	ncRNA			null	40S ribosomal protein S20-like	217.2258051	0.62964841	8.430433315	0	up
LOC100524710	ncRNA			null	apolipoprotein O-like	10.46404413	0.215030313	5.604756672	5.39E-05	up
LOC100524710	ncRNA			null	apolipoprotein O-like	10.46404413	0.215030313	5.604756672	5.39E-05	up
LOC100524710	ncRNA			null	apolipoprotein O-like	10.46404413	0.215030313	5.604756672	5.39E-05	up
LOC100524710	ncRNA			null	apolipoprotein O-like	10.46404413	0.215030313	5.604756672	5.39E-05	up
LOC100737295	ncRNA	chr15:146202074-146202556	-		60S ribosomal protein L28-like	24.17387974	0.102551687	7.880953994	3.10E-11	up
LOC100737295	ncRNA	chr15:146202074-146202556	-		60S ribosomal protein L28-like	24.17387974	0.102551687	7.880953994	3.10E-11	up
LOC100737295	ncRNA	chr15:146202074-146202556	-		60S ribosomal protein L28-like	24.17387974	0.102551687	7.880953994	3.10E-11	up
LOC100156130	ncRNA	chr4:35723145-35741597	-		DNA-(apurinic or apyrimidinic site) lyase 2-like	10.41559949	0.318960897	5.029222499	0.019338741	up
LOC100156130	ncRNA	chr4:35723145-35741597	-		DNA-(apurinic or apyrimidinic site) lyase 2-like	10.41559949	0.318960897	5.029222499	0.019338741	up
LOC100156130	ncRNA	chr4:35723145-35741597	-		DNA-(apurinic or apyrimidinic site) lyase 2-like	10.41559949	0.318960897	5.029222499	0.019338741	up
LOC100156130	ncRNA	chr4:35723145-35741597	-		DNA-(apurinic or apyrimidinic site) lyase 2-like	10.41559949	0.318960897	5.029222499	0.019338741	up
LOC100517180	ncRNA	chr9:97007659-97008211	+		ribosomal protein L17 pseudogene	28.38856418	0	20	0	up
LOC100517180	ncRNA	chr9:97007659-97008211	+		ribosomal protein L17 pseudogene	28.38856418	0	20	0	up
LOC100517180	ncRNA	chr9:97007659-97008211	+		ribosomal protein L17 pseudogene	28.38856418	0	20	0	up
LOC102167474	ncRNA	chr18:37179960-37189445	-	ssc:102167474	protein MANBAL-like	25.33655131	0.166649592	7.248258571	1.48E-14	up
LOC102167474	ncRNA	chr18:37179960-37189445	-	ssc:102167474	protein MANBAL-like	25.33655131	0.166649592	7.248258571	1.48E-14	up
LOC100627509	ncRNA	chr1:113933462-113934002	+		ribosomal protein L17 pseudogene	22.04231519	0.048380721	8.831627786	0	up
LOC100627509	ncRNA	chr1:113933462-113934002	+		ribosomal protein L17 pseudogene	22.04231519	0.048380721	8.831627786	0	up
LOC100627509	ncRNA	chr1:113933462-113934002	+		ribosomal protein L17 pseudogene	22.04231519	0.048380721	8.831627786	0	up
LOC100627507	ncRNA			null	NEDD8-conjugating enzyme UBE2F-like	14.67872858	0.316203103	5.536731679	4.57E-08	up
LOC100627507	ncRNA			null	NEDD8-conjugating enzyme UBE2F-like	14.67872858	0.316203103	5.536731679	4.57E-08	up
LOC100627507	ncRNA			null	NEDD8-conjugating enzyme UBE2F-like	14.67872858	0.316203103	5.536731679	4.57E-08	up
LOC102159855	ncRNA	chr7:22858043-22906717	-	ssc:102159855	uncharacterized LOC102159855	10.46404413	0.317582	5.042167576	1.85E-04	up
LOC102159855	ncRNA	chr7:22858043-22906717	-	ssc:102159855	uncharacterized LOC102159855	10.46404413	0.317582	5.042167576	1.85E-04	up
LOC102159855	ncRNA	chr7:22858043-22906717	-	ssc:102159855	uncharacterized LOC102159855	10.46404413	0.317582	5.042167576	1.85E-04	up
LOC102159855	ncRNA	chr7:22858043-22906717	-	ssc:102159855	uncharacterized LOC102159855	10.46404413	0.317582	5.042167576	1.85E-04	up
LOC100156310	ncRNA	chrx:93210175-93211233	-		heterogeneous nuclear ribonucleoprotein A2/B1 pseudogene	13.6129463	0.055549864	7.936980256	1.64E-08	up
LOC100156310	ncRNA	chrx:93210175-93211233	-		heterogeneous nuclear ribonucleoprotein A2/B1 pseudogene	13.6129463	0.055549864	7.936980256	1.64E-08	up
LOC100156310	ncRNA	chrx:93210175-93211233	-		heterogeneous nuclear ribonucleoprotein A2/B1 pseudogene	13.6129463	0.055549864	7.936980256	1.64E-08	up
LOC100156310	ncRNA	chrx:93210175-93211233	-		heterogeneous nuclear ribonucleoprotein A2/B1 pseudogene	13.6129463	0.055549864	7.936980256	1.64E-08	up
LOC102166403	ncRNA			null	intraflagellar transport 20 homolog (Chlamydomonas) pseudogene	22.04231519	0	20	1.46E-10	up
LOC102166403	ncRNA			null	intraflagellar transport 20 homolog (Chlamydomonas) pseudogene	22.04231519	0	20	1.46E-10	up
LOC102166403	ncRNA			null	intraflagellar transport 20 homolog (Chlamydomonas) pseudogene	22.04231519	0	20	1.46E-10	up
LOC102164221	ncRNA			null	serine/arginine repetitive matrix protein 1-like	266.2517896	0.972874532	8.09632175	0	up
LOC102164221	ncRNA			null	serine/arginine repetitive matrix protein 1-like	266.2517896	0.972874532	8.09632175	0	up
LOC102164221	ncRNA			null	serine/arginine repetitive matrix protein 1-like	266.2517896	0.972874532	8.09632175	0	up
LOC102163367	ncRNA	chr10:22597625-22599541	-		tyrosylprotein sulfotransferase 2 pseudogene	464.826405	1.505212188	8.270581339	0	up
LOC102163367	ncRNA	chr10:22597625-22599541	-		tyrosylprotein sulfotransferase 2 pseudogene	464.826405	1.505212188	8.270581339	0	up
LOC102163367	ncRNA	chr10:22597625-22599541	-		tyrosylprotein sulfotransferase 2 pseudogene	464.826405	1.505212188	8.270581339	0	up
LOC102161181	ncRNA	chr5:50313184-50315343	-		60S ribosomal protein L11-like	11.48138176	0.111099728	6.691297185	1.41E-04	up
LOC102161181	ncRNA	chr5:50313184-50315343	-		60S ribosomal protein L11-like	11.48138176	0.111099728	6.691297185	1.41E-04	up
LOC102161181	ncRNA	chr5:50313184-50315343	-		60S ribosomal protein L11-like	11.48138176	0.111099728	6.691297185	1.41E-04	up
LOC100737137	ncRNA			null	arylsulfatase I-like	49.51043104	6.506853211	2.927700596	2.65E-07	up
LOC100737137	ncRNA			null	arylsulfatase I-like	49.51043104	6.506853211	2.927700596	2.65E-07	up
LOC100737137	ncRNA			null	arylsulfatase I-like	49.51043104	6.506853211	2.927700596	2.65E-07	up
LOC100737137	ncRNA			null	arylsulfatase I-like	49.51043104	6.506853211	2.927700596	2.65E-07	up
LOC100625537	ncRNA	chr13:74831834-74832699	-		60S ribosomal protein L10a-like	22.04231519	0.159480449	7.110752385	1.78E-15	up
LOC100625537	ncRNA	chr13:74831834-74832699	-		60S ribosomal protein L10a-like	22.04231519	0.159480449	7.110752385	1.78E-15	up
LOC100625537	ncRNA	chr13:74831834-74832699	-		60S ribosomal protein L10a-like	22.04231519	0.159480449	7.110752385	1.78E-15	up
LOC102162022	ncRNA	chr2:151139556-151140962	+	ssc:102162022	uncharacterized LOC102162022	35.6552615	0.215030313	7.373431126	0	up
LOC102162022	ncRNA	chr2:151139556-151140962	+	ssc:102162022	uncharacterized LOC102162022	35.6552615	0.215030313	7.373431126	0	up
LOC102166458	ncRNA			null	homeobox protein NANOG-like	389.930978	4.352968321	6.485075443	0	up
LOC102166458	ncRNA			null	homeobox protein NANOG-like	389.930978	4.352968321	6.485075443	0	up
LOC102166458	ncRNA			null	homeobox protein NANOG-like	389.930978	4.352968321	6.485075443	0	up
LOC100155410	ncRNA	chr1:293567792-293580469	-		N-acetyllactosaminide alpha-1,3-galactosyltransferase-like	31.3921324	0.055549864	9.142403939	7.47E-14	up
LOC100155410	ncRNA	chr1:293567792-293580469	-		N-acetyllactosaminide alpha-1,3-galactosyltransferase-like	31.3921324	0.055549864	9.142403939	7.47E-14	up
LOC100155410	ncRNA	chr1:293567792-293580469	-		N-acetyllactosaminide alpha-1,3-galactosyltransferase-like	31.3921324	0.055549864	9.142403939	7.47E-14	up
LOC102165124	ncRNA	chr1:202464666-202466169	+		dnaJ homolog subfamily A member 1-like	58.71491431	0.220820558	8.054708709	0	up
LOC102165124	ncRNA	chr1:202464666-202466169	+		dnaJ homolog subfamily A member 1-like	58.71491431	0.220820558	8.054708709	0	up
LOC102165124	ncRNA	chr1:202464666-202466169	+		dnaJ homolog subfamily A member 1-like	58.71491431	0.220820558	8.054708709	0	up
LOC102158838	ncRNA	chr3:14619509-14701720	-		40S ribosomal protein S20-like	35.70370614	0.159480449	7.806550459	0	up
LOC102158838	ncRNA	chr3:14619509-14701720	-		40S ribosomal protein S20-like	35.70370614	0.159480449	7.806550459	0	up
LOC102158838	ncRNA	chr3:14619509-14701720	-		40S ribosomal protein S20-like	35.70370614	0.159480449	7.806550459	0	up
LOC100519064	ncRNA	chr17:43267086-43267740	+		60S ribosomal protein L10a-like	11.67516035	0.055549864	7.715443272	2.71E-09	up
LOC100519064	ncRNA	chr17:43267086-43267740	+		60S ribosomal protein L10a-like	11.67516035	0.055549864	7.715443272	2.71E-09	up
LOC100519064	ncRNA	chr17:43267086-43267740	+		60S ribosomal protein L10a-like	11.67516035	0.055549864	7.715443272	2.71E-09	up
LOC100523580	ncRNA	chr1:109470904-109473475	+		ras-related protein Rab-3C-like	35.60681685	0.111099728	8.324154376	3.33E-16	up
LOC100523580	ncRNA	chr1:109470904-109473475	+		ras-related protein Rab-3C-like	35.60681685	0.111099728	8.324154376	3.33E-16	up
LOC100523580	ncRNA	chr1:109470904-109473475	+		ras-related protein Rab-3C-like	35.60681685	0.111099728	8.324154376	3.33E-16	up
LOC102165118	ncRNA			null	porimin-like	134.3854557	0.331920286	8.661324484	0	up
LOC102165118	ncRNA			null	porimin-like	134.3854557	0.331920286	8.661324484	0	up
LOC102165118	ncRNA			null	porimin-like	134.3854557	0.331920286	8.661324484	0	up
LOC100513759	ncRNA	chr13:89556830-89557278	+		CDGSH iron-sulfur domain-containing protein 1-like	14.63028393	0	20	0.043926208	up
LOC100513759	ncRNA	chr13:89556830-89557278	+		CDGSH iron-sulfur domain-containing protein 1-like	14.63028393	0	20	0.043926208	up
LOC100513759	ncRNA	chr13:89556830-89557278	+		CDGSH iron-sulfur domain-containing protein 1-like	14.63028393	0	20	0.043926208	up
LOC102166442	ncRNA			null	protein RUFY3-like	64.91582935	0.358793577	7.499272438	0	up
LOC102166442	ncRNA			null	protein RUFY3-like	64.91582935	0.358793577	7.499272438	0	up
LOC102166442	ncRNA			null	protein RUFY3-like	64.91582935	0.358793577	7.499272438	0	up
LOC100625986	ncRNA	chr15:18468176-18478656	+		coiled-coil domain-containing protein 132-like	10.46404413	0.150932408	6.115394107	2.31E-05	up
LOC100625986	ncRNA	chr15:18468176-18478656	+		coiled-coil domain-containing protein 132-like	10.46404413	0.150932408	6.115394107	2.31E-05	up
LOC100625986	ncRNA	chr15:18468176-18478656	+		coiled-coil domain-containing protein 132-like	10.46404413	0.150932408	6.115394107	2.31E-05	up
LOC102162080	ncRNA	chr8:32792230-32792876	+		ubiquitin-conjugating enzyme E2 E3-like	57.60068739	0.317582	7.502813073	0	up
LOC102162080	ncRNA	chr8:32792230-32792876	+		ubiquitin-conjugating enzyme E2 E3-like	57.60068739	0.317582	7.502813073	0	up
LOC102162080	ncRNA	chr8:32792230-32792876	+		ubiquitin-conjugating enzyme E2 E3-like	57.60068739	0.317582	7.502813073	0	up
LOC100623791	ncRNA	chr13:52628295-52630378	-		protein tyrosine phosphatase type IVA 1-like	12.64405333	0	20	0.00143146	up
LOC100623791	ncRNA	chr13:52628295-52630378	-		protein tyrosine phosphatase type IVA 1-like	12.64405333	0	20	0.00143146	up
LOC100623791	ncRNA	chr13:52628295-52630378	-		protein tyrosine phosphatase type IVA 1-like	12.64405333	0	20	0.00143146	up
LOC102165578	ncRNA	chr1:105953115-105953672	-		diazepam binding inhibitor (GABA receptor modulator, acyl-CoA binding protein) pseudogene	80.66034021	0.367341618	7.778593325	0	up
LOC102165578	ncRNA	chr1:105953115-105953672	-		diazepam binding inhibitor (GABA receptor modulator, acyl-CoA binding protein) pseudogene	80.66034021	0.367341618	7.778593325	0	up
LOC102165578	ncRNA	chr1:105953115-105953672	-		diazepam binding inhibitor (GABA receptor modulator, acyl-CoA binding protein) pseudogene	80.66034021	0.367341618	7.778593325	0	up
LOC100525743	ncRNA			null	high mobility group nucleosome binding domain 1 pseudogene	22.04231519	0	20	1.46E-10	up
LOC100525743	ncRNA			null	high mobility group nucleosome binding domain 1 pseudogene	22.04231519	0	20	1.46E-10	up
LOC100525743	ncRNA			null	high mobility group nucleosome binding domain 1 pseudogene	22.04231519	0	20	1.46E-10	up
LOC100155447	ncRNA	chr14:82287523-82291307	+		DNA endonuclease RBBP8-like	16.71340383	0.145142162	6.847395102	4.57E-06	up
LOC100155447	ncRNA	chr14:82287523-82291307	+		DNA endonuclease RBBP8-like	16.71340383	0.145142162	6.847395102	4.57E-06	up
LOC100155447	ncRNA	chr14:82287523-82291307	+		DNA endonuclease RBBP8-like	16.71340383	0.145142162	6.847395102	4.57E-06	up
LOC100516803	ncRNA	chr5:66494045-66495135	+		TBP-related factor 10 pseudogene	29.35745716	0.222199456	7.045727919	9.99E-16	up
LOC100516803	ncRNA	chr5:66494045-66495135	+		TBP-related factor 10 pseudogene	29.35745716	0.222199456	7.045727919	9.99E-16	up
LOC100516803	ncRNA	chr5:66494045-66495135	+		TBP-related factor 10 pseudogene	29.35745716	0.222199456	7.045727919	9.99E-16	up
LOC102157956	ncRNA			null	small EDRK-rich factor 2 pseudogene	24.22232439	0.111099728	7.76833822	1.25E-12	up
LOC102157956	ncRNA			null	small EDRK-rich factor 2 pseudogene	24.22232439	0.111099728	7.76833822	1.25E-12	up
LOC102157956	ncRNA			null	small EDRK-rich factor 2 pseudogene	24.22232439	0.111099728	7.76833822	1.25E-12	up
LOC102157950	ncRNA	chr6:113625396-113626996	-		ribosomal protein L4 pseudogene	48.10553623	0.152311305	8.303036095	8.55E-15	up
LOC102157950	ncRNA	chr6:113625396-113626996	-		ribosomal protein L4 pseudogene	48.10553623	0.152311305	8.303036095	8.55E-15	up
LOC102157950	ncRNA	chr6:113625396-113626996	-		ribosomal protein L4 pseudogene	48.10553623	0.152311305	8.303036095	8.55E-15	up
LOC102159286	ncRNA	chr5:38534288-38534894	-		C1D nuclear receptor corepressor pseudogene	11.52982641	0.159480449	6.175847413	4.79E-06	up
LOC102159286	ncRNA	chr5:38534288-38534894	-		C1D nuclear receptor corepressor pseudogene	11.52982641	0.159480449	6.175847413	4.79E-06	up
LOC102159286	ncRNA	chr5:38534288-38534894	-		C1D nuclear receptor corepressor pseudogene	11.52982641	0.159480449	6.175847413	4.79E-06	up
LOC102161122	ncRNA	chr14:112924423-112924923	-		60S ribosomal protein L15-like	23.10809746	0	20	5.48E-12	up
LOC102161122	ncRNA	chr14:112924423-112924923	-		60S ribosomal protein L15-like	23.10809746	0	20	5.48E-12	up
LOC102161122	ncRNA	chr14:112924423-112924923	-		60S ribosomal protein L15-like	23.10809746	0	20	5.48E-12	up
LOC102161121	ncRNA	chr1:283184497-283187439	-	ssc:102161121	suppression of tumorigenicity 13 (colon carcinoma) (Hsp70 interacting protein) pseudogene	34.68636852	0.373131864	6.538539431	0	up
LOC102161121	ncRNA	chr1:283184497-283187439	-	ssc:102161121	suppression of tumorigenicity 13 (colon carcinoma) (Hsp70 interacting protein) pseudogene	34.68636852	0.373131864	6.538539431	0	up
LOC102161121	ncRNA	chr1:283184497-283187439	-	ssc:102161121	suppression of tumorigenicity 13 (colon carcinoma) (Hsp70 interacting protein) pseudogene	34.68636852	0.373131864	6.538539431	0	up
LOC100515977	ncRNA	chr16:34943547-34943959	-		general transcription factor IIA, 2, 12kDa pseudogene	25.14277271	0.048380721	9.02149578	3.35E-14	up
LOC100515977	ncRNA	chr16:34943547-34943959	-		general transcription factor IIA, 2, 12kDa pseudogene	25.14277271	0.048380721	9.02149578	3.35E-14	up
LOC100515977	ncRNA	chr16:34943547-34943959	-		general transcription factor IIA, 2, 12kDa pseudogene	25.14277271	0.048380721	9.02149578	3.35E-14	up
LOC100155850	ncRNA	chrx:68421081-68421359	+		small ubiquitin-related modifier 1-like	33.4752523	0.111099728	8.235095836	5.72E-13	up
LOC100155850	ncRNA	chrx:68421081-68421359	+		small ubiquitin-related modifier 1-like	33.4752523	0.111099728	8.235095836	5.72E-13	up
LOC100155850	ncRNA	chrx:68421081-68421359	+		small ubiquitin-related modifier 1-like	33.4752523	0.111099728	8.235095836	5.72E-13	up
LOC102161586	ncRNA	chr7:62819193-62821197	-		N-chimaerin-like	105.9484469	0.159480449	9.375767155	0	up
LOC102161586	ncRNA	chr7:62819193-62821197	-		N-chimaerin-like	105.9484469	0.159480449	9.375767155	0	up
LOC102161586	ncRNA	chr7:62819193-62821197	-		N-chimaerin-like	105.9484469	0.159480449	9.375767155	0	up
LOC100736686	ncRNA	chr6:12582349-12597585	+		transformer-2 protein homolog alpha-like	62.92959875	0.152311305	8.690571903	0	up
LOC100736686	ncRNA	chr6:12582349-12597585	+		transformer-2 protein homolog alpha-like	62.92959875	0.152311305	8.690571903	0	up
LOC100736686	ncRNA	chr6:12582349-12597585	+		transformer-2 protein homolog alpha-like	62.92959875	0.152311305	8.690571903	0	up
LOC100737533	ncRNA	chr13:23916841-23918537	+		phospholipid transfer protein-like	25.19121736	0.38747015	6.022691859	1.33E-15	up
LOC100737533	ncRNA	chr13:23916841-23918537	+		phospholipid transfer protein-like	25.19121736	0.38747015	6.022691859	1.33E-15	up
LOC100737533	ncRNA	chr13:23916841-23918537	+		phospholipid transfer protein-like	25.19121736	0.38747015	6.022691859	1.33E-15	up
LOC100622425	ncRNA	chr13:99048442-99049607	+		ribosomal protein S23 pseudogene	15.6960662	0.165270694	6.569428291	2.14E-07	up
LOC100622425	ncRNA	chr13:99048442-99049607	+		ribosomal protein S23 pseudogene	15.6960662	0.165270694	6.569428291	2.14E-07	up
LOC100622425	ncRNA	chr13:99048442-99049607	+		ribosomal protein S23 pseudogene	15.6960662	0.165270694	6.569428291	2.14E-07	up
LOC100513340	ncRNA	chr2:53808737-53809891	+		mitochondrial ribosomal protein L15 pseudogene	48.20242553	0.163891797	8.200218285	0	up
LOC100513340	ncRNA	chr2:53808737-53809891	+		mitochondrial ribosomal protein L15 pseudogene	48.20242553	0.163891797	8.200218285	0	up
LOC100513340	ncRNA	chr2:53808737-53809891	+		mitochondrial ribosomal protein L15 pseudogene	48.20242553	0.163891797	8.200218285	0	up
LOC100516844	ncRNA	chr1:182582220-182582652	+		ribosomal protein L31 pseudogene	24.17387974	0.220820558	6.774430731	9.37E-10	up
LOC100516844	ncRNA	chr1:182582220-182582652	+		ribosomal protein L31 pseudogene	24.17387974	0.220820558	6.774430731	9.37E-10	up
LOC100516844	ncRNA	chr1:182582220-182582652	+		ribosomal protein L31 pseudogene	24.17387974	0.220820558	6.774430731	9.37E-10	up
LOC100152300	ncRNA	chr13:11468198-11471231	-		elongation factor 1-alpha 1-like	91.02749504	0.367341618	7.953036214	0	up
LOC100152300	ncRNA	chr13:11468198-11471231	-		elongation factor 1-alpha 1-like	91.02749504	0.367341618	7.953036214	0	up
LOC100152300	ncRNA	chr13:11468198-11471231	-		elongation factor 1-alpha 1-like	91.02749504	0.367341618	7.953036214	0	up
LOC100737510	ncRNA	chr6:85471199-85471797	-		UPF0184 protein C9orf16-like	19.91075065	0.111099728	7.485548519	8.51E-12	up
LOC100737510	ncRNA	chr6:85471199-85471797	-		UPF0184 protein C9orf16-like	19.91075065	0.111099728	7.485548519	8.51E-12	up
LOC100737510	ncRNA	chr6:85471199-85471797	-		UPF0184 protein C9orf16-like	19.91075065	0.111099728	7.485548519	8.51E-12	up
LOC102157906	ncRNA	chr14:77597388-77597758	+		ribosomal protein L35a pseudogene	45.05352336	0.165270694	8.090665194	0	up
LOC102157906	ncRNA	chr14:77597388-77597758	+		ribosomal protein L35a pseudogene	45.05352336	0.165270694	8.090665194	0	up
LOC102157906	ncRNA	chr14:77597388-77597758	+		ribosomal protein L35a pseudogene	45.05352336	0.165270694	8.090665194	0	up
LOC100155826	ncRNA	chr11:26294881-26295430	+		NADH dehydrogenase [ubiquinone] 1 beta subcomplex subunit 6-like	17.82763075	0.055549864	8.326115892	6.13E-13	up
LOC100155826	ncRNA	chr11:26294881-26295430	+		NADH dehydrogenase [ubiquinone] 1 beta subcomplex subunit 6-like	17.82763075	0.055549864	8.326115892	6.13E-13	up
LOC100155826	ncRNA	chr11:26294881-26295430	+		NADH dehydrogenase [ubiquinone] 1 beta subcomplex subunit 6-like	17.82763075	0.055549864	8.326115892	6.13E-13	up
LOC100623724	ncRNA	chr6:40953731-40955438	-		zinc finger protein 260-like	24.07699044	0	20	1.59E-10	up
LOC100623724	ncRNA	chr6:40953731-40955438	-		zinc finger protein 260-like	24.07699044	0	20	1.59E-10	up
LOC100623724	ncRNA	chr6:40953731-40955438	-		zinc finger protein 260-like	24.07699044	0	20	1.59E-10	up
LOC100738821	ncRNA	chr1:283985126-284017383	-		40S ribosomal protein S3-like	97.71285657	0.636542897	7.262146845	0	up
LOC100738821	ncRNA	chr1:283985126-284017383	-		40S ribosomal protein S3-like	97.71285657	0.636542897	7.262146845	0	up
LOC100738821	ncRNA	chr1:283985126-284017383	-		40S ribosomal protein S3-like	97.71285657	0.636542897	7.262146845	0	up
LOC100153667	ncRNA			null	alpha-N-acetyl-neuraminyl-2,3-beta-galactosyl-1,3-N-acetyl-galactosaminide alpha-2,6-sialyltransferase-like	199.7372869	0.222199456	9.812032682	0	up
LOC100153667	ncRNA			null	alpha-N-acetyl-neuraminyl-2,3-beta-galactosyl-1,3-N-acetyl-galactosaminide alpha-2,6-sialyltransferase-like	199.7372869	0.222199456	9.812032682	0	up
LOC100153667	ncRNA			null	alpha-N-acetyl-neuraminyl-2,3-beta-galactosyl-1,3-N-acetyl-galactosaminide alpha-2,6-sialyltransferase-like	199.7372869	0.222199456	9.812032682	0	up
LOC100620675	ncRNA	chr6:45378259-45379421	+		enolase-phosphatase E1-like	16.81029312	0.158101551	6.732349548	8.54E-04	up
LOC100620675	ncRNA	chr6:45378259-45379421	+		enolase-phosphatase E1-like	16.81029312	0.158101551	6.732349548	8.54E-04	up
LOC100620675	ncRNA	chr6:45378259-45379421	+		enolase-phosphatase E1-like	16.81029312	0.158101551	6.732349548	8.54E-04	up
LOC102161130	ncRNA	chr17:5152164-5153308	-		60S ribosomal protein L6-like	34.63792387	0.24769385	7.127650604	0	up
LOC102161130	ncRNA	chr17:5152164-5153308	-		60S ribosomal protein L6-like	34.63792387	0.24769385	7.127650604	0	up
LOC102161130	ncRNA	chr17:5152164-5153308	-		60S ribosomal protein L6-like	34.63792387	0.24769385	7.127650604	0	up
LOC100523096	ncRNA	chr15:72590738-72591391	+		60S ribosomal protein L10a-like	31.34368776	0	20	9.44E-15	up
LOC100523096	ncRNA	chr15:72590738-72591391	+		60S ribosomal protein L10a-like	31.34368776	0	20	9.44E-15	up
LOC100523096	ncRNA	chr15:72590738-72591391	+		60S ribosomal protein L10a-like	31.34368776	0	20	9.44E-15	up
LOC102161638	ncRNA			null	ferritin, light polypeptide pseudogene	15.6960662	0.048380721	8.341755054	1.36E-08	up
LOC102161638	ncRNA			null	ferritin, light polypeptide pseudogene	15.6960662	0.048380721	8.341755054	1.36E-08	up
LOC102161638	ncRNA			null	ferritin, light polypeptide pseudogene	15.6960662	0.048380721	8.341755054	1.36E-08	up
LOC102161638	ncRNA			null	ferritin, light polypeptide pseudogene	15.6960662	0.048380721	8.341755054	1.36E-08	up
LOC100152750	ncRNA	chr15:20296397-20298419	+		selenide, water dikinase 1-like	39.96683524	0.096761442	8.69015536	0	up
LOC100152750	ncRNA	chr15:20296397-20298419	+		selenide, water dikinase 1-like	39.96683524	0.096761442	8.69015536	0	up
LOC100152750	ncRNA	chr15:20296397-20298419	+		selenide, water dikinase 1-like	39.96683524	0.096761442	8.69015536	0	up
LOC100516782	ncRNA	chr2:64727903-64742155	+		uncharacterized LOC100516782	79.83678118	0.484231592	7.365212541	0	up
LOC100516782	ncRNA	chr2:64727903-64742155	+		uncharacterized LOC100516782	79.83678118	0.484231592	7.365212541	0	up
LOC100516782	ncRNA	chr2:64727903-64742155	+		uncharacterized LOC100516782	79.83678118	0.484231592	7.365212541	0	up
LOC102162953	ncRNA			null	microtubule-associated protein 4-like	231.0809746	0.421512585	9.098607065	0	up
LOC102162953	ncRNA			null	microtubule-associated protein 4-like	231.0809746	0.421512585	9.098607065	0	up
LOC102162953	ncRNA			null	microtubule-associated protein 4-like	231.0809746	0.421512585	9.098607065	0	up
LOC100621972	ncRNA	chr3:82604814-82607971	-		malate dehydrogenase, cytoplasmic-like	241.3027955	15.55155503	3.955713879	2.22E-16	up
LOC100621972	ncRNA	chr3:82604814-82607971	-		malate dehydrogenase, cytoplasmic-like	241.3027955	15.55155503	3.955713879	2.22E-16	up
LOC100621972	ncRNA	chr3:82604814-82607971	-		malate dehydrogenase, cytoplasmic-like	241.3027955	15.55155503	3.955713879	2.22E-16	up
LOC102166074	ncRNA	chr15:15314965-15334125	+		kelch-like protein 7-like	58.71491431	0.103930585	9.141962929	0	up
LOC102166074	ncRNA	chr15:15314965-15334125	+		kelch-like protein 7-like	58.71491431	0.103930585	9.141962929	0	up
LOC102166074	ncRNA	chr15:15314965-15334125	+		kelch-like protein 7-like	58.71491431	0.103930585	9.141962929	0	up
LOC102159307	ncRNA			null	ribosomal protein S27 pseudogene	23.01120817	0.269201279	6.417507657	2.88E-08	up
LOC102159307	ncRNA			null	ribosomal protein S27 pseudogene	23.01120817	0.269201279	6.417507657	2.88E-08	up
LOC102159307	ncRNA			null	ribosomal protein S27 pseudogene	23.01120817	0.269201279	6.417507657	2.88E-08	up
LOC100155800	ncRNA	chr14:58097121-58098044	+		ferritin, light polypeptide pseudogene	53.67667084	0.111099728	8.916296102	0	up
LOC100155800	ncRNA	chr14:58097121-58098044	+		ferritin, light polypeptide pseudogene	53.67667084	0.111099728	8.916296102	0	up
LOC100155800	ncRNA	chr14:58097121-58098044	+		ferritin, light polypeptide pseudogene	53.67667084	0.111099728	8.916296102	0	up
LOC100622811	ncRNA	chr3:42560081-42560966	-		ribosomal protein S2e pseudogene	23.10809746	0.993957577	4.539070397	0.005962767	up
LOC100622811	ncRNA	chr3:42560081-42560966	-		ribosomal protein S2e pseudogene	23.10809746	0.993957577	4.539070397	0.005962767	up
LOC100622811	ncRNA	chr3:42560081-42560966	-		ribosomal protein S2e pseudogene	23.10809746	0.993957577	4.539070397	0.005962767	up
LOC102160758	ncRNA	chr3:128137116-128142378	-		hexokinase-1-like	4.263129092	0.166649592	4.677023054	0.005869773	up
LOC102160758	ncRNA	chr3:128137116-128142378	-		hexokinase-1-like	4.263129092	0.166649592	4.677023054	0.005869773	up
LOC102160758	ncRNA	chr3:128137116-128142378	-		hexokinase-1-like	4.263129092	0.166649592	4.677023054	0.005869773	up
LOC102161675	ncRNA			null	probable palmitoyltransferase ZDHHC12-like	28.29167488	0.048380721	9.19172961	5.55E-16	up
LOC102161675	ncRNA			null	probable palmitoyltransferase ZDHHC12-like	28.29167488	0.048380721	9.19172961	5.55E-16	up
LOC102161675	ncRNA			null	probable palmitoyltransferase ZDHHC12-like	28.29167488	0.048380721	9.19172961	5.55E-16	up
LOC100516371	ncRNA	chr5:81871856-81874043	-		olfactory receptor 10AD1-like	27.17744796	0.207861169	7.030645906	6.85E-09	up
LOC100516371	ncRNA	chr5:81871856-81874043	-		olfactory receptor 10AD1-like	27.17744796	0.207861169	7.030645906	6.85E-09	up
LOC100516371	ncRNA	chr5:81871856-81874043	-		olfactory receptor 10AD1-like	27.17744796	0.207861169	7.030645906	6.85E-09	up
LOC102162982	ncRNA	chr2:52688020-52689033	-		calponin-3-like	224.2987238	0.111099728	10.97935041	0	up
LOC102162982	ncRNA	chr2:52688020-52689033	-		calponin-3-like	224.2987238	0.111099728	10.97935041	0	up
LOC102162982	ncRNA	chr2:52688020-52689033	-		calponin-3-like	224.2987238	0.111099728	10.97935041	0	up
LOC102161657	ncRNA	chr4:16388083-16388877	+		40S ribosomal protein S3a-like	64.964274	0.270580176	7.907446594	0	up
LOC102161657	ncRNA	chr4:16388083-16388877	+		40S ribosomal protein S3a-like	64.964274	0.270580176	7.907446594	0	up
LOC102161657	ncRNA	chr4:16388083-16388877	+		40S ribosomal protein S3a-like	64.964274	0.270580176	7.907446594	0	up
LOC102159338	ncRNA	chr15:150722818-150726144	+		phosphatidylinositol transfer protein beta isoform-like	10.41559949	0.055549864	7.550746785	7.60E-04	up
LOC102159338	ncRNA	chr15:150722818-150726144	+		phosphatidylinositol transfer protein beta isoform-like	10.41559949	0.055549864	7.550746785	7.60E-04	up
LOC102159338	ncRNA	chr15:150722818-150726144	+		phosphatidylinositol transfer protein beta isoform-like	10.41559949	0.055549864	7.550746785	7.60E-04	up
LOC100621908	ncRNA	chr6:12317926-12318187	-		60S ribosomal protein L37a-like	13.7098356	0.048380721	8.146563294	6.14E-04	up
LOC100621908	ncRNA	chr6:12317926-12318187	-		60S ribosomal protein L37a-like	13.7098356	0.048380721	8.146563294	6.14E-04	up
LOC100621908	ncRNA	chr6:12317926-12318187	-		60S ribosomal protein L37a-like	13.7098356	0.048380721	8.146563294	6.14E-04	up
LOC100523921	ncRNA	chr12:52601696-52624231	+		proteasome maturation protein-like	15.74451085	0.159480449	6.625325558	0.017268968	up
LOC100523921	ncRNA	chr12:52601696-52624231	+		proteasome maturation protein-like	15.74451085	0.159480449	6.625325558	0.017268968	up
LOC100523921	ncRNA	chr12:52601696-52624231	+		proteasome maturation protein-like	15.74451085	0.159480449	6.625325558	0.017268968	up
LOC100738044	ncRNA	chr2:78542590-78543805	+		dnaJ homolog subfamily B member 6-like	19.862306	0.048380721	8.681385151	6.51E-09	up
LOC100738044	ncRNA	chr2:78542590-78543805	+		dnaJ homolog subfamily B member 6-like	19.862306	0.048380721	8.681385151	6.51E-09	up
LOC100738044	ncRNA	chr2:78542590-78543805	+		dnaJ homolog subfamily B member 6-like	19.862306	0.048380721	8.681385151	6.51E-09	up
LOC102166051	ncRNA	chr7:14280690-14283243	+		protein N-terminal glutamine amidohydrolase-like	55.61445679	0.317582	7.452187	0	up
LOC102166051	ncRNA	chr7:14280690-14283243	+		protein N-terminal glutamine amidohydrolase-like	55.61445679	0.317582	7.452187	0	up
LOC102166051	ncRNA	chr7:14280690-14283243	+		protein N-terminal glutamine amidohydrolase-like	55.61445679	0.317582	7.452187	0	up
LOC102160747	ncRNA	chr17:43240756-43248937	+		ATP synthase subunit d, mitochondrial-like	27.27433726	0.048380721	9.138896163	0	up
LOC102160747	ncRNA	chr17:43240756-43248937	+		ATP synthase subunit d, mitochondrial-like	27.27433726	0.048380721	9.138896163	0	up
LOC102160747	ncRNA	chr17:43240756-43248937	+		ATP synthase subunit d, mitochondrial-like	27.27433726	0.048380721	9.138896163	0	up
LOC100625468	ncRNA	chr15:116442916-116462430	+		heterogeneous nuclear ribonucleoprotein D-like	35.70370614	0.055549864	9.328074745	0	up
LOC100625468	ncRNA	chr15:116442916-116462430	+		heterogeneous nuclear ribonucleoprotein D-like	35.70370614	0.055549864	9.328074745	0	up
LOC100625468	ncRNA	chr15:116442916-116462430	+		heterogeneous nuclear ribonucleoprotein D-like	35.70370614	0.055549864	9.328074745	0	up
LOC100523503	ncRNA	chr9:7459660-7460348	+		60S ribosomal protein L9-like	52.36866532	0.111099728	8.880704744	0	up
LOC100523503	ncRNA	chr9:7459660-7460348	+		60S ribosomal protein L9-like	52.36866532	0.111099728	8.880704744	0	up
LOC100523503	ncRNA	chr9:7459660-7460348	+		60S ribosomal protein L9-like	52.36866532	0.111099728	8.880704744	0	up
LOC102166037	ncRNA	chr13:150057839-150063093	-		60S ribosomal protein L37a-like	193.9723737	9.112137243	4.411917906	8.88E-16	up
LOC102166037	ncRNA	chr13:150057839-150063093	-		60S ribosomal protein L37a-like	193.9723737	9.112137243	4.411917906	8.88E-16	up
LOC102166037	ncRNA	chr13:150057839-150063093	-		60S ribosomal protein L37a-like	193.9723737	9.112137243	4.411917906	8.88E-16	up
LOC100519480	ncRNA	chr4:102756507-102757278	-	ssc:100519480	glutaredoxin-1-like	25.14277271	0	20	5.95E-12	up
LOC100519480	ncRNA	chr4:102756507-102757278	-	ssc:100519480	glutaredoxin-1-like	25.14277271	0	20	5.95E-12	up
LOC100737184	ncRNA	chr8:75313037-75313641	+	ssc:100737184	non-histone chromosomal protein HMG-14-like	21.94542589	0.048380721	8.825272291	4.13E-09	up
LOC100737184	ncRNA	chr8:75313037-75313641	+	ssc:100737184	non-histone chromosomal protein HMG-14-like	21.94542589	0.048380721	8.825272291	4.13E-09	up
LOC100154078	ncRNA			null	GTP-binding nuclear protein Ran-like	59.68380729	0.637921794	6.547816191	6.66E-16	up
LOC100154078	ncRNA			null	GTP-binding nuclear protein Ran-like	59.68380729	0.637921794	6.547816191	6.66E-16	up
LOC100154078	ncRNA			null	GTP-binding nuclear protein Ran-like	59.68380729	0.637921794	6.547816191	6.66E-16	up
LOC102158409	ncRNA	chr8:144262932-144268295	+		60S ribosomal protein L35a-like	19.95919529	0	20	3.69E-09	up
LOC102158409	ncRNA	chr8:144262932-144268295	+		60S ribosomal protein L35a-like	19.95919529	0	20	3.69E-09	up
LOC102158409	ncRNA	chr8:144262932-144268295	+		60S ribosomal protein L35a-like	19.95919529	0	20	3.69E-09	up
LOC102157559	ncRNA	chr12:37393076-37396863	-		programmed cell death protein 2-like	111.1804689	0.165270694	9.393856726	0	up
LOC102157559	ncRNA	chr12:37393076-37396863	-		programmed cell death protein 2-like	111.1804689	0.165270694	9.393856726	0	up
LOC102157559	ncRNA	chr12:37393076-37396863	-		programmed cell death protein 2-like	111.1804689	0.165270694	9.393856726	0	up
LOC100517296	ncRNA	chr9:78866540-78872207	-		ribosomal protein S19 pseudogene	9.398261862	0.686577172	3.774900171	0.031098757	up
LOC100517296	ncRNA	chr9:78866540-78872207	-		ribosomal protein S19 pseudogene	9.398261862	0.686577172	3.774900171	0.031098757	up
LOC100517296	ncRNA	chr9:78866540-78872207	-		ribosomal protein S19 pseudogene	9.398261862	0.686577172	3.774900171	0.031098757	up
LOC102163265	miscRNA			ssc:102163265	uncharacterized LOC102163265	53.4344476	0.166649592	8.324808511	0	up
LOC102163265	miscRNA			ssc:102163265	uncharacterized LOC102163265	53.4344476	0.166649592	8.324808511	0	up
LOC102163265	miscRNA			ssc:102163265	uncharacterized LOC102163265	53.4344476	0.166649592	8.324808511	0	up
LOC100153390	miscRNA			ssc:100153390	uncharacterized LOC100153390	42.04995513	0.807878494	5.701822125	0	up
LOC100153390	miscRNA			ssc:100153390	uncharacterized LOC100153390	42.04995513	0.807878494	5.701822125	0	up
LOC100153390	miscRNA			ssc:100153390	uncharacterized LOC100153390	42.04995513	0.807878494	5.701822125	0	up
LOC102164104	miscRNA			ssc:102164104	uncharacterized LOC102164104	15.6960662	0.566654747	4.791789228	4.96E-05	up
LOC102164104	miscRNA			ssc:102164104	uncharacterized LOC102164104	15.6960662	0.566654747	4.791789228	4.96E-05	up
LOC102164104	miscRNA			ssc:102164104	uncharacterized LOC102164104	15.6960662	0.566654747	4.791789228	4.96E-05	up
LOC102164104	miscRNA			ssc:102164104	uncharacterized LOC102164104	15.6960662	0.566654747	4.791789228	4.96E-05	up
LOC102164586	miscRNA			ssc:102164586	uncharacterized LOC102164586	23.10809746	0.37892211	5.930353353	8.07E-07	up
LOC102164586	miscRNA			ssc:102164586	uncharacterized LOC102164586	23.10809746	0.37892211	5.930353353	8.07E-07	up
LOC102164586	miscRNA			ssc:102164586	uncharacterized LOC102164586	23.10809746	0.37892211	5.930353353	8.07E-07	up
LOC102164586	miscRNA			ssc:102164586	uncharacterized LOC102164586	23.10809746	0.37892211	5.930353353	8.07E-07	up
LOC102157815	miscRNA			ssc:102157815	uncharacterized LOC102157815	323.0773627	1.707557768	7.563801471	0	up
LOC102157815	miscRNA			ssc:102157815	uncharacterized LOC102157815	323.0773627	1.707557768	7.563801471	0	up
LOC102157815	miscRNA			ssc:102157815	uncharacterized LOC102157815	323.0773627	1.707557768	7.563801471	0	up
LOC102165425	miscRNA			ssc:102165425	uncharacterized LOC102165425	7.460475911	0.215030313	5.11665571	6.85E-04	up
LOC102165425	miscRNA			ssc:102165425	uncharacterized LOC102165425	7.460475911	0.215030313	5.11665571	6.85E-04	up
LOC102165425	miscRNA			ssc:102165425	uncharacterized LOC102165425	7.460475911	0.215030313	5.11665571	6.85E-04	up
LOC102162398	miscRNA			ssc:102162398	uncharacterized LOC102162398	10.46404413	0.103930585	6.653676448	8.41E-06	up
LOC102162398	miscRNA			ssc:102162398	uncharacterized LOC102162398	10.46404413	0.103930585	6.653676448	8.41E-06	up
LOC102162398	miscRNA			ssc:102162398	uncharacterized LOC102162398	10.46404413	0.103930585	6.653676448	8.41E-06	up
LOC102167607	miscRNA			ssc:102167607	uncharacterized LOC102167607	66.07850092	1.177977907	5.809796572	0	up
LOC102167607	miscRNA			ssc:102167607	uncharacterized LOC102167607	66.07850092	1.177977907	5.809796572	0	up
LOC102167607	miscRNA			ssc:102167607	uncharacterized LOC102167607	66.07850092	1.177977907	5.809796572	0	up
LOC102162396	miscRNA			ssc:102162396	uncharacterized LOC102162396	24.07699044	0.967084286	4.637869627	3.07E-06	up
LOC102162396	miscRNA			ssc:102162396	uncharacterized LOC102162396	24.07699044	0.967084286	4.637869627	3.07E-06	up
LOC102162396	miscRNA			ssc:102162396	uncharacterized LOC102162396	24.07699044	0.967084286	4.637869627	3.07E-06	up
LOC102166746	miscRNA			ssc:102166746	uncharacterized LOC102166746	21.07342222	0.642333143	5.035959071	6.47E-05	up
LOC102166746	miscRNA			ssc:102166746	uncharacterized LOC102166746	21.07342222	0.642333143	5.035959071	6.47E-05	up
LOC102166746	miscRNA			ssc:102166746	uncharacterized LOC102166746	21.07342222	0.642333143	5.035959071	6.47E-05	up
LOC102166742	miscRNA			ssc:102166742	uncharacterized LOC102166742	8.332479589	0.103930585	6.3250537	0.006163234	up
LOC102166742	miscRNA			ssc:102166742	uncharacterized LOC102166742	8.332479589	0.103930585	6.3250537	0.006163234	up
LOC102166742	miscRNA			ssc:102166742	uncharacterized LOC102166742	8.332479589	0.103930585	6.3250537	0.006163234	up
LOC102165488	miscRNA			ssc:102165488	uncharacterized LOC102165488	1955.565137	10.32791387	7.564892906	0	up
LOC102165488	miscRNA			ssc:102165488	uncharacterized LOC102165488	1955.565137	10.32791387	7.564892906	0	up
LOC102165488	miscRNA			ssc:102165488	uncharacterized LOC102165488	1955.565137	10.32791387	7.564892906	0	up
LOC102165002	miscRNA			ssc:102165002	uncharacterized LOC102165002	220.277818	0.166649592	10.36829072	0	up
LOC102165002	miscRNA			ssc:102165002	uncharacterized LOC102165002	220.277818	0.166649592	10.36829072	0	up
LOC102165002	miscRNA			ssc:102165002	uncharacterized LOC102165002	220.277818	0.166649592	10.36829072	0	up
LOC102157867	miscRNA			ssc:102157867	uncharacterized LOC102157867	64.964274	0.152311305	8.736479709	0	up
LOC102157867	miscRNA			ssc:102157867	uncharacterized LOC102157867	64.964274	0.152311305	8.736479709	0	up
LOC102157867	miscRNA			ssc:102157867	uncharacterized LOC102157867	64.964274	0.152311305	8.736479709	0	up
LOC102165476	miscRNA			ssc:102165476	uncharacterized LOC102165476	97.51907798	0.880524439	6.791177629	0	up
LOC102165476	miscRNA			ssc:102165476	uncharacterized LOC102165476	97.51907798	0.880524439	6.791177629	0	up
LOC102165476	miscRNA			ssc:102165476	uncharacterized LOC102165476	97.51907798	0.880524439	6.791177629	0	up
LOC102165474	miscRNA			ssc:102165474	uncharacterized LOC102165474	23.05965282	1.021529909	4.496567442	8.20E-08	up
LOC102165474	miscRNA			ssc:102165474	uncharacterized LOC102165474	23.05965282	1.021529909	4.496567442	8.20E-08	up
LOC102165474	miscRNA			ssc:102165474	uncharacterized LOC102165474	23.05965282	1.021529909	4.496567442	8.20E-08	up
LOC102164139	miscRNA			ssc:102164139	uncharacterized LOC102164139	36.76948842	0.548329496	6.067322212	0	up
LOC102164139	miscRNA			ssc:102164139	uncharacterized LOC102164139	36.76948842	0.548329496	6.067322212	0	up
LOC102164139	miscRNA			ssc:102164139	uncharacterized LOC102164139	36.76948842	0.548329496	6.067322212	0	up
LOC102157847	miscRNA			ssc:102157847	uncharacterized LOC102157847	95.43595808	0.32613004	8.192941797	0	up
LOC102157847	miscRNA			ssc:102157847	uncharacterized LOC102157847	95.43595808	0.32613004	8.192941797	0	up
LOC102157847	miscRNA			ssc:102157847	uncharacterized LOC102157847	95.43595808	0.32613004	8.192941797	0	up
LOC102166785	miscRNA			ssc:102166785	uncharacterized LOC102166785	42.87351416	0.103930585	8.688322591	2.41E-14	up
LOC102166785	miscRNA			ssc:102166785	uncharacterized LOC102166785	42.87351416	0.103930585	8.688322591	2.41E-14	up
LOC102166785	miscRNA			ssc:102166785	uncharacterized LOC102166785	42.87351416	0.103930585	8.688322591	2.41E-14	up
LOC102162335	miscRNA			ssc:102162335	uncharacterized LOC102162335	74.41098051	1.017118561	6.192955767	0	up
LOC102162335	miscRNA			ssc:102162335	uncharacterized LOC102162335	74.41098051	1.017118561	6.192955767	0	up
LOC102162335	miscRNA			ssc:102162335	uncharacterized LOC102162335	74.41098051	1.017118561	6.192955767	0	up
LOC102161006	miscRNA			ssc:102161006	uncharacterized LOC102161006	18.84496837	0.103930585	7.502415291	8.85E-10	up
LOC102161006	miscRNA			ssc:102161006	uncharacterized LOC102161006	18.84496837	0.103930585	7.502415291	8.85E-10	up
LOC102161006	miscRNA			ssc:102161006	uncharacterized LOC102161006	18.84496837	0.103930585	7.502415291	8.85E-10	up
LOC102164508	miscRNA			ssc:102164508	uncharacterized LOC102164508	308.0595215	0.706431047	8.768444662	0	up
LOC102164508	miscRNA			ssc:102164508	uncharacterized LOC102164508	308.0595215	0.706431047	8.768444662	0	up
LOC102164508	miscRNA			ssc:102164508	uncharacterized LOC102164508	308.0595215	0.706431047	8.768444662	0	up
LOC102162326	miscRNA			ssc:102162326	uncharacterized LOC102162326	145.8668375	0.813394083	7.486481715	0	up
LOC102162326	miscRNA			ssc:102162326	uncharacterized LOC102162326	145.8668375	0.813394083	7.486481715	0	up
LOC102162326	miscRNA			ssc:102162326	uncharacterized LOC102162326	145.8668375	0.813394083	7.486481715	0	up
LOC102164981	miscRNA			ssc:102164981	uncharacterized LOC102164981	302.3914976	1.126564735	8.06834355	0	up
LOC102164981	miscRNA			ssc:102164981	uncharacterized LOC102164981	302.3914976	1.126564735	8.06834355	0	up
LOC102164981	miscRNA			ssc:102164981	uncharacterized LOC102164981	302.3914976	1.126564735	8.06834355	0	up
LOC102160141	miscRNA			ssc:102160141	uncharacterized LOC102160141	10.46404413	0.456933916	4.517311189	8.78E-04	up
LOC102160141	miscRNA			ssc:102160141	uncharacterized LOC102160141	10.46404413	0.456933916	4.517311189	8.78E-04	up
LOC102160141	miscRNA			ssc:102160141	uncharacterized LOC102160141	10.46404413	0.456933916	4.517311189	8.78E-04	up
LOC102160141	miscRNA			ssc:102160141	uncharacterized LOC102160141	10.46404413	0.456933916	4.517311189	8.78E-04	up
LOC102159157	miscRNA			ssc:102159157	uncharacterized LOC102159157	223.7658327	0.414343441	9.076946963	0	up
LOC102159157	miscRNA			ssc:102159157	uncharacterized LOC102159157	223.7658327	0.414343441	9.076946963	0	up
LOC102159157	miscRNA			ssc:102159157	uncharacterized LOC102159157	223.7658327	0.414343441	9.076946963	0	up
LOC102163642	miscRNA			ssc:102163642	uncharacterized LOC102163642	23.01120817	0.103930585	7.790572649	7.64E-10	up
LOC102163642	miscRNA			ssc:102163642	uncharacterized LOC102163642	23.01120817	0.103930585	7.790572649	7.64E-10	up
LOC102163642	miscRNA			ssc:102163642	uncharacterized LOC102163642	23.01120817	0.103930585	7.790572649	7.64E-10	up
LOC102162796	miscRNA			ssc:102162796	uncharacterized LOC102162796	336.9809769	0.333299184	9.981633652	0	up
LOC102162796	miscRNA			ssc:102162796	uncharacterized LOC102162796	336.9809769	0.333299184	9.981633652	0	up
LOC102162796	miscRNA			ssc:102162796	uncharacterized LOC102162796	336.9809769	0.333299184	9.981633652	0	up
LOC102162316	miscRNA			ssc:102162316	uncharacterized LOC102162316	372.2971258	0.593952422	9.291891393	0	up
LOC102162316	miscRNA			ssc:102162316	uncharacterized LOC102162316	372.2971258	0.593952422	9.291891393	0	up
LOC102162316	miscRNA			ssc:102162316	uncharacterized LOC102162316	372.2971258	0.593952422	9.291891393	0	up
LOC102161456	miscRNA			ssc:102161456	uncharacterized LOC102161456	186.9478996	1.029803293	7.504123663	0	up
LOC102161456	miscRNA			ssc:102161456	uncharacterized LOC102161456	186.9478996	1.029803293	7.504123663	0	up
LOC102161456	miscRNA			ssc:102161456	uncharacterized LOC102161456	186.9478996	1.029803293	7.504123663	0	up
LOC102161457	miscRNA			ssc:102161457	uncharacterized LOC102161457	134.0947878	0.87611309	7.257920339	0	up
LOC102161457	miscRNA			ssc:102161457	uncharacterized LOC102161457	134.0947878	0.87611309	7.257920339	0	up
LOC102161457	miscRNA			ssc:102161457	uncharacterized LOC102161457	134.0947878	0.87611309	7.257920339	0	up
LOC102160128	miscRNA			ssc:102160128	uncharacterized LOC102160128	65.01271865	0.606487427	6.744100437	0	up
LOC102160128	miscRNA			ssc:102160128	uncharacterized LOC102160128	65.01271865	0.606487427	6.744100437	0	up
LOC102160128	miscRNA			ssc:102160128	uncharacterized LOC102160128	65.01271865	0.606487427	6.744100437	0	up
LOC102158288	miscRNA			ssc:102158288	uncharacterized LOC102158288	19.95919529	0	20	3.69E-09	up
LOC102158288	miscRNA			ssc:102158288	uncharacterized LOC102158288	19.95919529	0	20	3.69E-09	up
LOC102158288	miscRNA			ssc:102158288	uncharacterized LOC102158288	19.95919529	0	20	3.69E-09	up
LOC102160193	miscRNA			ssc:102160193	uncharacterized LOC102160193	191.1141394	0.490021837	8.60737276	0	up
LOC102160193	miscRNA			ssc:102160193	uncharacterized LOC102160193	191.1141394	0.490021837	8.60737276	0	up
LOC102160193	miscRNA			ssc:102160193	uncharacterized LOC102160193	191.1141394	0.490021837	8.60737276	0	up
LOC102159194	miscRNA			ssc:102159194	uncharacterized LOC102159194	39.96683524	0.791886654	5.657365582	0	up
LOC102159194	miscRNA			ssc:102159194	uncharacterized LOC102159194	39.96683524	0.791886654	5.657365582	0	up
LOC102159194	miscRNA			ssc:102159194	uncharacterized LOC102159194	39.96683524	0.791886654	5.657365582	0	up
LOC102159190	miscRNA	chr13:155539714-155540844	-	ssc:102159190	calmodulin-like	10.46404413	0.111099728	6.557441438	8.66E-06	up
LOC102159190	miscRNA	chr13:155539714-155540844	-	ssc:102159190	calmodulin-like	10.46404413	0.111099728	6.557441438	8.66E-06	up
LOC102164542	miscRNA			ssc:102164542	uncharacterized LOC102164542	108.9035704	0.656671429	7.373663851	0	up
LOC102164542	miscRNA			ssc:102164542	uncharacterized LOC102164542	108.9035704	0.656671429	7.373663851	0	up
LOC102164542	miscRNA			ssc:102164542	uncharacterized LOC102164542	108.9035704	0.656671429	7.373663851	0	up
LOC102165871	miscRNA			ssc:102165871	uncharacterized LOC102165871	37.88371534	0.276370422	7.098830792	0	up
LOC102165871	miscRNA			ssc:102165871	uncharacterized LOC102165871	37.88371534	0.276370422	7.098830792	0	up
LOC102165871	miscRNA			ssc:102165871	uncharacterized LOC102165871	37.88371534	0.276370422	7.098830792	0	up
LOC102164531	miscRNA			ssc:102164531	uncharacterized LOC102164531	14.67872858	0.111099728	7.045727919	6.28E-10	up
LOC102164531	miscRNA			ssc:102164531	uncharacterized LOC102164531	14.67872858	0.111099728	7.045727919	6.28E-10	up
LOC102164531	miscRNA			ssc:102164531	uncharacterized LOC102164531	14.67872858	0.111099728	7.045727919	6.28E-10	up
LOC102164531	miscRNA			ssc:102164531	uncharacterized LOC102164531	14.67872858	0.111099728	7.045727919	6.28E-10	up
LOC102161014	miscRNA			ssc:102161014	uncharacterized LOC102161014	18.84496837	0.111099728	7.406180281	9.01E-10	up
LOC102161014	miscRNA			ssc:102161014	uncharacterized LOC102161014	18.84496837	0.111099728	7.406180281	9.01E-10	up
LOC102161014	miscRNA			ssc:102161014	uncharacterized LOC102161014	18.84496837	0.111099728	7.406180281	9.01E-10	up
LOC102159173	miscRNA			ssc:102159173	uncharacterized LOC102159173	19.862306	0.213651415	6.538630445	3.42E-07	up
LOC102159173	miscRNA			ssc:102159173	uncharacterized LOC102159173	19.862306	0.213651415	6.538630445	3.42E-07	up
LOC102159173	miscRNA			ssc:102159173	uncharacterized LOC102159173	19.862306	0.213651415	6.538630445	3.42E-07	up
LOC102168157	miscRNA			ssc:102168157	uncharacterized LOC102168157	20.87964362	1.045370749	4.320010486	0.003541012	up
LOC102168157	miscRNA			ssc:102168157	uncharacterized LOC102168157	20.87964362	1.045370749	4.320010486	0.003541012	up
LOC102168157	miscRNA			ssc:102168157	uncharacterized LOC102168157	20.87964362	1.045370749	4.320010486	0.003541012	up
LOC102168157	miscRNA			ssc:102168157	uncharacterized LOC102168157	20.87964362	1.045370749	4.320010486	0.003541012	up
LOC102161517	miscRNA			ssc:102161517	uncharacterized LOC102161517	30.37479478	0.215030313	7.142190802	2.08E-13	up
LOC102161517	miscRNA			ssc:102161517	uncharacterized LOC102161517	30.37479478	0.215030313	7.142190802	2.08E-13	up
LOC102161517	miscRNA			ssc:102161517	uncharacterized LOC102161517	30.37479478	0.215030313	7.142190802	2.08E-13	up
LOC102168144	miscRNA			ssc:102168144	uncharacterized LOC102168144	47.2819772	0	20	0	up
LOC102168144	miscRNA			ssc:102168144	uncharacterized LOC102168144	47.2819772	0	20	0	up
LOC102168144	miscRNA			ssc:102168144	uncharacterized LOC102168144	47.2819772	0	20	0	up
LOC100738817	miscRNA	chr9:49470238-49470735	+	ssc:100738817	60S ribosomal protein L23a-like	38.85260831	0.199313129	7.606830901	0	up
LOC100738817	miscRNA	chr9:49470238-49470735	+	ssc:100738817	60S ribosomal protein L23a-like	38.85260831	0.199313129	7.606830901	0	up
LOC100738817	miscRNA	chr9:49470238-49470735	+	ssc:100738817	60S ribosomal protein L23a-like	38.85260831	0.199313129	7.606830901	0	up
LOC102159661	miscRNA			ssc:102159661	uncharacterized LOC102159661	673.5259519	0.27774932	11.24373444	0	up
LOC102159661	miscRNA			ssc:102159661	uncharacterized LOC102159661	673.5259519	0.27774932	11.24373444	0	up
LOC102159661	miscRNA			ssc:102159661	uncharacterized LOC102159661	673.5259519	0.27774932	11.24373444	0	up
LOC102161982	miscRNA			ssc:102161982	uncharacterized LOC102161982	176.4354108	1.952918207	6.497364804	0	up
LOC102161982	miscRNA			ssc:102161982	uncharacterized LOC102161982	176.4354108	1.952918207	6.497364804	0	up
LOC102161982	miscRNA			ssc:102161982	uncharacterized LOC102161982	176.4354108	1.952918207	6.497364804	0	up
LOC102162832	miscRNA			ssc:102162832	transcription factor SOX-5-like	15.7929555	67.02019354	-2.08531467	9.28E-04	down
LOC102162832	miscRNA			ssc:102162832	transcription factor SOX-5-like	15.7929555	67.02019354	-2.08531467	9.28E-04	down
LOC102162832	miscRNA			ssc:102162832	transcription factor SOX-5-like	15.7929555	67.02019354	-2.08531467	9.28E-04	down
LOC102161985	miscRNA			ssc:102161985	uncharacterized LOC102161985	1075.713426	8.67855802	6.953622722	0	up
LOC102161985	miscRNA			ssc:102161985	uncharacterized LOC102161985	1075.713426	8.67855802	6.953622722	0	up
LOC102161985	miscRNA			ssc:102161985	uncharacterized LOC102161985	1075.713426	8.67855802	6.953622722	0	up
LOC102158329	miscRNA			ssc:102158329	uncharacterized LOC102158329	26.16011034	0.103930585	7.975604543	1.86E-11	up
LOC102158329	miscRNA			ssc:102158329	uncharacterized LOC102158329	26.16011034	0.103930585	7.975604543	1.86E-11	up
LOC102158329	miscRNA			ssc:102158329	uncharacterized LOC102158329	26.16011034	0.103930585	7.975604543	1.86E-11	up
LOC102167272	miscRNA			ssc:102167272	uncharacterized LOC102167272	20.92808827	0.152311305	7.10227369	3.57E-09	up
LOC102167272	miscRNA			ssc:102167272	uncharacterized LOC102167272	20.92808827	0.152311305	7.10227369	3.57E-09	up
LOC102167272	miscRNA			ssc:102167272	uncharacterized LOC102167272	20.92808827	0.152311305	7.10227369	3.57E-09	up
LOC100517777	miscRNA			ssc:100517777	uncharacterized LOC100517777	6915.861169	14.15289974	8.932667426	0	up
LOC100517777	miscRNA			ssc:100517777	uncharacterized LOC100517777	6915.861169	14.15289974	8.932667426	0	up
LOC100517777	miscRNA			ssc:100517777	uncharacterized LOC100517777	6915.861169	14.15289974	8.932667426	0	up
LOC102159657	miscRNA			ssc:102159657	uncharacterized LOC102159657	16.81029312	0.159480449	6.719821502	8.54E-04	up
LOC102159657	miscRNA			ssc:102159657	uncharacterized LOC102159657	16.81029312	0.159480449	6.719821502	8.54E-04	up
LOC102159657	miscRNA			ssc:102159657	uncharacterized LOC102159657	16.81029312	0.159480449	6.719821502	8.54E-04	up
LOC102162817	miscRNA			ssc:102162817	uncharacterized LOC102162817	90.8821611	0.222199456	8.675998048	0	up
LOC102162817	miscRNA			ssc:102162817	uncharacterized LOC102162817	90.8821611	0.222199456	8.675998048	0	up
LOC102162817	miscRNA			ssc:102162817	uncharacterized LOC102162817	90.8821611	0.222199456	8.675998048	0	up
LOC102160231	miscRNA			ssc:102160231	uncharacterized LOC102160231	518.3577419	1.762153118	8.20046501	0	up
LOC102160231	miscRNA			ssc:102160231	uncharacterized LOC102160231	518.3577419	1.762153118	8.20046501	0	up
LOC102160231	miscRNA			ssc:102160231	uncharacterized LOC102160231	518.3577419	1.762153118	8.20046501	0	up
LOC102163743	miscRNA			ssc:102163743	uncharacterized LOC102163743	2179.815416	1.829133746	10.21882969	0	up
LOC102163743	miscRNA			ssc:102163743	uncharacterized LOC102163743	2179.815416	1.829133746	10.21882969	0	up
LOC102163743	miscRNA			ssc:102163743	uncharacterized LOC102163743	2179.815416	1.829133746	10.21882969	0	up
LOC102160234	miscRNA			ssc:102160234	uncharacterized LOC102160234	370.1655613	0.437229768	9.725563335	0	up
LOC102160234	miscRNA			ssc:102160234	uncharacterized LOC102160234	370.1655613	0.437229768	9.725563335	0	up
LOC102160234	miscRNA			ssc:102160234	uncharacterized LOC102160234	370.1655613	0.437229768	9.725563335	0	up
LOC102162416	miscRNA			ssc:102162416	uncharacterized LOC102162416	113.5058121	3.209712706	5.144178192	0	up
LOC102162416	miscRNA			ssc:102162416	uncharacterized LOC102162416	113.5058121	3.209712706	5.144178192	0	up
LOC102162416	miscRNA			ssc:102162416	uncharacterized LOC102162416	113.5058121	3.209712706	5.144178192	0	up
LOC102168196	miscRNA			ssc:102168196	uncharacterized LOC102168196	48.15398088	0.215030313	7.806971211	1.11E-16	up
LOC102168196	miscRNA			ssc:102168196	uncharacterized LOC102168196	48.15398088	0.215030313	7.806971211	1.11E-16	up
LOC102168196	miscRNA			ssc:102168196	uncharacterized LOC102168196	48.15398088	0.215030313	7.806971211	1.11E-16	up
LOC102159249	miscRNA			ssc:102159249	uncharacterized LOC102159249	11.52982641	0.103930585	6.793606709	1.93E-06	up
LOC102159249	miscRNA			ssc:102159249	uncharacterized LOC102159249	11.52982641	0.103930585	6.793606709	1.93E-06	up
LOC102159249	miscRNA			ssc:102159249	uncharacterized LOC102159249	11.52982641	0.103930585	6.793606709	1.93E-06	up
LOC102162882	miscRNA			ssc:102162882	uncharacterized LOC102162882	25.14277271	0.055549864	8.822144664	3.35E-14	up
LOC102162882	miscRNA			ssc:102162882	uncharacterized LOC102162882	25.14277271	0.055549864	8.822144664	3.35E-14	up
LOC102162882	miscRNA			ssc:102162882	uncharacterized LOC102162882	25.14277271	0.055549864	8.822144664	3.35E-14	up
LOC102162886	miscRNA			ssc:102162886	uncharacterized LOC102162886	178.4700861	0.921736016	7.59711294	0	up
LOC102162886	miscRNA			ssc:102162886	uncharacterized LOC102162886	178.4700861	0.921736016	7.59711294	0	up
LOC102162886	miscRNA			ssc:102162886	uncharacterized LOC102162886	178.4700861	0.921736016	7.59711294	0	up
LOC102163727	miscRNA			ssc:102163727	uncharacterized LOC102163727	478.9722424	4.590460576	6.705159329	0	up
LOC102163727	miscRNA			ssc:102163727	uncharacterized LOC102163727	478.9722424	4.590460576	6.705159329	0	up
LOC102163727	miscRNA			ssc:102163727	uncharacterized LOC102163727	478.9722424	4.590460576	6.705159329	0	up
LOC102163704	miscRNA			ssc:102163704	uncharacterized LOC102163704	427.2818022	3.719208017	6.844048623	0	up
LOC102163704	miscRNA			ssc:102163704	uncharacterized LOC102163704	427.2818022	3.719208017	6.844048623	0	up
LOC102163704	miscRNA			ssc:102163704	uncharacterized LOC102163704	427.2818022	3.719208017	6.844048623	0	up
LOC102159216	miscRNA			ssc:102159216	uncharacterized LOC102159216	59.1024715	24.29406123	1.282614776	0.010031713	up
LOC102159216	miscRNA			ssc:102159216	uncharacterized LOC102159216	59.1024715	24.29406123	1.282614776	0.010031713	up
LOC102159216	miscRNA			ssc:102159216	uncharacterized LOC102159216	59.1024715	24.29406123	1.282614776	0.010031713	up
LOC102159216	miscRNA			ssc:102159216	uncharacterized LOC102159216	59.1024715	24.29406123	1.282614776	0.010031713	up
LOC102166377	miscRNA			ssc:102166377	uncharacterized LOC102166377	50.47932402	2.184470489	4.53033707	0	up
LOC102166377	miscRNA			ssc:102166377	uncharacterized LOC102166377	50.47932402	2.184470489	4.53033707	0	up
LOC102166377	miscRNA			ssc:102166377	uncharacterized LOC102166377	50.47932402	2.184470489	4.53033707	0	up
LOC102167693	miscRNA			ssc:102167693	uncharacterized LOC102167693	471.0757647	0.552740845	9.735140173	0	up
LOC102167693	miscRNA			ssc:102167693	uncharacterized LOC102167693	471.0757647	0.552740845	9.735140173	0	up
LOC102167693	miscRNA			ssc:102167693	uncharacterized LOC102167693	471.0757647	0.552740845	9.735140173	0	up
LOC102166362	miscRNA	chr2:18651611-18653748	+	ssc:102166362	PR domain-containing protein 11-like	24.07699044	3.433715443	2.809812679	0.011183508	up
LOC102166362	miscRNA	chr2:18651611-18653748	+	ssc:102166362	PR domain-containing protein 11-like	24.07699044	3.433715443	2.809812679	0.011183508	up
LOC102157414	miscRNA			ssc:102157414	ribosomal protein L39 pseudogene	25.19121736	0.108341933	7.861185293	0	up
LOC102157414	miscRNA			ssc:102157414	ribosomal protein L39 pseudogene	25.19121736	0.108341933	7.861185293	0	up
LOC102157414	miscRNA			ssc:102157414	ribosomal protein L39 pseudogene	25.19121736	0.108341933	7.861185293	0	up
LOC102166342	miscRNA			ssc:102166342	uncharacterized LOC102166342	247.6005999	0	20	0	up
LOC102166342	miscRNA			ssc:102166342	uncharacterized LOC102166342	247.6005999	0	20	0	up
LOC102166342	miscRNA			ssc:102166342	uncharacterized LOC102166342	247.6005999	0	20	0	up
LOC102165496	miscRNA			ssc:102165496	uncharacterized LOC102165496	71.26207834	16.896868	2.076378707	0.015454876	up
LOC102165496	miscRNA			ssc:102165496	uncharacterized LOC102165496	71.26207834	16.896868	2.076378707	0.015454876	up
LOC102165496	miscRNA			ssc:102165496	uncharacterized LOC102165496	71.26207834	16.896868	2.076378707	0.015454876	up
LOC102165490	miscRNA			ssc:102165490	uncharacterized LOC102165490	69.42118169	0.193522883	8.486727945	0	up
LOC102165490	miscRNA			ssc:102165490	uncharacterized LOC102165490	69.42118169	0.193522883	8.486727945	0	up
LOC102165490	miscRNA			ssc:102165490	uncharacterized LOC102165490	69.42118169	0.193522883	8.486727945	0	up
LOC100512951	miscRNA			ssc:100512951	transcription factor 7-like	163.9366914	56.85278902	1.527835757	9.42E-05	up
LOC100512951	miscRNA			ssc:100512951	transcription factor 7-like	163.9366914	56.85278902	1.527835757	9.42E-05	up
LOC100512951	miscRNA			ssc:100512951	transcription factor 7-like	163.9366914	56.85278902	1.527835757	9.42E-05	up
LOC102165076	miscRNA			ssc:102165076	uncharacterized LOC102165076	20.05608459	51.31580503	-1.355363251	0.030621411	down
LOC102165076	miscRNA			ssc:102165076	uncharacterized LOC102165076	20.05608459	51.31580503	-1.355363251	0.030621411	down
LOC102165076	miscRNA			ssc:102165076	uncharacterized LOC102165076	20.05608459	51.31580503	-1.355363251	0.030621411	down
LOC102157459	miscRNA			ssc:102157459	uncharacterized LOC102157459	138.4548062	4.880065044	4.826370948	0	up
LOC102157459	miscRNA			ssc:102157459	uncharacterized LOC102157459	138.4548062	4.880065044	4.826370948	0	up
LOC102157459	miscRNA			ssc:102157459	uncharacterized LOC102157459	138.4548062	4.880065044	4.826370948	0	up
LOC102158786	miscRNA			ssc:102158786	uncharacterized LOC102158786	1175.89696	6.677090181	7.460326406	0	up
LOC102158786	miscRNA			ssc:102158786	uncharacterized LOC102158786	1175.89696	6.677090181	7.460326406	0	up
LOC102158786	miscRNA			ssc:102158786	uncharacterized LOC102158786	1175.89696	6.677090181	7.460326406	0	up
LOC102158784	miscRNA			ssc:102158784	uncharacterized LOC102158784	126.7312012	1.390525081	6.509998182	0	up
LOC102158784	miscRNA			ssc:102158784	uncharacterized LOC102158784	126.7312012	1.390525081	6.509998182	0	up
LOC102158784	miscRNA			ssc:102158784	uncharacterized LOC102158784	126.7312012	1.390525081	6.509998182	0	up
LOC100513825	miscRNA	chr15:91059898-91061413	+	ssc:100513825	high mobility group protein B3-like	18.84496837	0.103930585	7.502415291	8.85E-10	up
LOC100513825	miscRNA	chr15:91059898-91061413	+	ssc:100513825	high mobility group protein B3-like	18.84496837	0.103930585	7.502415291	8.85E-10	up
LOC100513825	miscRNA	chr15:91059898-91061413	+	ssc:100513825	high mobility group protein B3-like	18.84496837	0.103930585	7.502415291	8.85E-10	up
LOC102167245	miscRNA			ssc:102167245	uncharacterized LOC102167245	77.60832733	6.297463416	3.62336872	7.93E-10	up
LOC102167245	miscRNA			ssc:102167245	uncharacterized LOC102167245	77.60832733	6.297463416	3.62336872	7.93E-10	up
LOC102167245	miscRNA			ssc:102167245	uncharacterized LOC102167245	77.60832733	6.297463416	3.62336872	7.93E-10	up
LOC102165055	miscRNA			ssc:102165055	uncharacterized LOC102165055	199.3981743	0.491400735	8.66453647	0	up
LOC102165055	miscRNA			ssc:102165055	uncharacterized LOC102165055	199.3981743	0.491400735	8.66453647	0	up
LOC102165055	miscRNA			ssc:102165055	uncharacterized LOC102165055	199.3981743	0.491400735	8.66453647	0	up
LOC102166384	miscRNA			ssc:102166384	uncharacterized LOC102166384	262.8122196	1.141177677	7.847365114	0	up
LOC102166384	miscRNA			ssc:102166384	uncharacterized LOC102166384	262.8122196	1.141177677	7.847365114	0	up
LOC102166384	miscRNA			ssc:102166384	uncharacterized LOC102166384	262.8122196	1.141177677	7.847365114	0	up
LOC102167234	miscRNA			ssc:102167234	uncharacterized LOC102167234	941.1341917	1.35620799	9.438678185	0	up
LOC102167234	miscRNA			ssc:102167234	uncharacterized LOC102167234	941.1341917	1.35620799	9.438678185	0	up
LOC102167234	miscRNA			ssc:102167234	uncharacterized LOC102167234	941.1341917	1.35620799	9.438678185	0	up
LOC102158762	miscRNA			ssc:102158762	uncharacterized LOC102158762	38.80416367	0.152311305	7.99304462	0	up
LOC102158762	miscRNA			ssc:102158762	uncharacterized LOC102158762	38.80416367	0.152311305	7.99304462	0	up
LOC102158762	miscRNA			ssc:102158762	uncharacterized LOC102158762	38.80416367	0.152311305	7.99304462	0	up
LOC102164479	miscRNA			ssc:102164479	uncharacterized LOC102164479	13.6129463	0.373131864	5.189149974	6.15E-06	up
LOC102164479	miscRNA			ssc:102164479	uncharacterized LOC102164479	13.6129463	0.373131864	5.189149974	6.15E-06	up
LOC102164479	miscRNA			ssc:102164479	uncharacterized LOC102164479	13.6129463	0.373131864	5.189149974	6.15E-06	up
LOC102163146	miscRNA			ssc:102163146	uncharacterized LOC102163146	53.38600295	0.263411033	7.663001951	0	up
LOC102163146	miscRNA			ssc:102163146	uncharacterized LOC102163146	53.38600295	0.263411033	7.663001951	0	up
LOC102163146	miscRNA			ssc:102163146	uncharacterized LOC102163146	53.38600295	0.263411033	7.663001951	0	up
LOC102167987	miscRNA			ssc:102167987	uncharacterized LOC102167987	25.28810666	0.213651415	6.887056342	1.90E-12	up
LOC102167987	miscRNA			ssc:102167987	uncharacterized LOC102167987	25.28810666	0.213651415	6.887056342	1.90E-12	up
LOC102167987	miscRNA			ssc:102167987	uncharacterized LOC102167987	25.28810666	0.213651415	6.887056342	1.90E-12	up
LOC100517092	miscRNA			ssc:100517092	uncharacterized LOC100517092	35.70370614	1.937731152	4.203633513	1.61E-13	up
LOC100517092	miscRNA			ssc:100517092	uncharacterized LOC100517092	35.70370614	1.937731152	4.203633513	1.61E-13	up
LOC100517092	miscRNA			ssc:100517092	uncharacterized LOC100517092	35.70370614	1.937731152	4.203633513	1.61E-13	up
LOC102167509	miscRNA			ssc:102167509	uncharacterized LOC102167509	48.20242553	0.222199456	7.761106651	0	up
LOC102167509	miscRNA			ssc:102167509	uncharacterized LOC102167509	48.20242553	0.222199456	7.761106651	0	up
LOC102167509	miscRNA			ssc:102167509	uncharacterized LOC102167509	48.20242553	0.222199456	7.761106651	0	up
LOC102167508	miscRNA			ssc:102167508	uncharacterized LOC102167508	78.91633285	1.997012508	5.304408643	0	up
LOC102167508	miscRNA			ssc:102167508	uncharacterized LOC102167508	78.91633285	1.997012508	5.304408643	0	up
LOC102167508	miscRNA			ssc:102167508	uncharacterized LOC102167508	78.91633285	1.997012508	5.304408643	0	up
LOC102166650	miscRNA			ssc:102166650	uncharacterized LOC102166650	75.57365208	0.588162176	7.005525522	0	up
LOC102166650	miscRNA			ssc:102166650	uncharacterized LOC102166650	75.57365208	0.588162176	7.005525522	0	up
LOC102166650	miscRNA			ssc:102166650	uncharacterized LOC102166650	75.57365208	0.588162176	7.005525522	0	up
LOC102167980	miscRNA			ssc:102167980	uncharacterized LOC102167980	44.22996433	3.468032534	3.672834741	1.92E-10	up
LOC102167980	miscRNA			ssc:102167980	uncharacterized LOC102167980	44.22996433	3.468032534	3.672834741	1.92E-10	up
LOC102167980	miscRNA			ssc:102167980	uncharacterized LOC102167980	44.22996433	3.468032534	3.672834741	1.92E-10	up
LOC102167982	miscRNA			ssc:102167982	uncharacterized LOC102167982	76.68787901	21.72547589	1.81961079	3.56E-05	up
LOC102167982	miscRNA			ssc:102167982	uncharacterized LOC102167982	76.68787901	21.72547589	1.81961079	3.56E-05	up
LOC102167982	miscRNA			ssc:102167982	uncharacterized LOC102167982	76.68787901	21.72547589	1.81961079	3.56E-05	up
LOC102157701	miscRNA			ssc:102157701	uncharacterized LOC102157701	32.70013792	2.070612966	3.981166902	5.46E-08	up
LOC102157701	miscRNA			ssc:102157701	uncharacterized LOC102157701	32.70013792	2.070612966	3.981166902	5.46E-08	up
LOC102157701	miscRNA			ssc:102157701	uncharacterized LOC102157701	32.70013792	2.070612966	3.981166902	5.46E-08	up
LOC102167974	miscRNA			ssc:102167974	uncharacterized LOC102167974	52.56244392	6.204289354	3.082694479	9.22E-08	up
LOC102167974	miscRNA			ssc:102167974	uncharacterized LOC102167974	52.56244392	6.204289354	3.082694479	9.22E-08	up
LOC102167974	miscRNA			ssc:102167974	uncharacterized LOC102167974	52.56244392	6.204289354	3.082694479	9.22E-08	up
LOC102162277	miscRNA			ssc:102162277	uncharacterized LOC102162277	333.78363	3.385334722	6.623470905	0	up
LOC102162277	miscRNA			ssc:102162277	uncharacterized LOC102162277	333.78363	3.385334722	6.623470905	0	up
LOC102162277	miscRNA			ssc:102162277	uncharacterized LOC102162277	333.78363	3.385334722	6.623470905	0	up
LOC102163127	miscRNA			ssc:102163127	uncharacterized LOC102163127	13.6129463	0.262032136	5.699091782	1.46E-06	up
LOC102163127	miscRNA			ssc:102163127	uncharacterized LOC102163127	13.6129463	0.262032136	5.699091782	1.46E-06	up
LOC102163127	miscRNA			ssc:102163127	uncharacterized LOC102163127	13.6129463	0.262032136	5.699091782	1.46E-06	up
LOC102163127	miscRNA			ssc:102163127	uncharacterized LOC102163127	13.6129463	0.262032136	5.699091782	1.46E-06	up
LOC100512652	miscRNA			ssc:100512652	lysyl oxidase homolog 3-like	94.51550975	39.75324698	1.249478389	0.023472718	up
LOC100512652	miscRNA			ssc:100512652	lysyl oxidase homolog 3-like	94.51550975	39.75324698	1.249478389	0.023472718	up
LOC100512652	miscRNA			ssc:100512652	lysyl oxidase homolog 3-like	94.51550975	39.75324698	1.249478389	0.023472718	up
LOC102162266	miscRNA			ssc:102162266	uncharacterized LOC102162266	1066.751166	1.602248286	9.378910246	0	up
LOC102162266	miscRNA			ssc:102162266	uncharacterized LOC102162266	1066.751166	1.602248286	9.378910246	0	up
LOC102162266	miscRNA			ssc:102162266	uncharacterized LOC102162266	1066.751166	1.602248286	9.378910246	0	up
LOC102164444	miscRNA			ssc:102164444	uncharacterized LOC102164444	2080.310108	14.16262735	7.198565865	0	up
LOC102164444	miscRNA			ssc:102164444	uncharacterized LOC102164444	2080.310108	14.16262735	7.198565865	0	up
LOC102164444	miscRNA			ssc:102164444	uncharacterized LOC102164444	2080.310108	14.16262735	7.198565865	0	up
LOC102159095	miscRNA			ssc:102159095	uncharacterized LOC102159095	329.6173902	0.111099728	11.53472136	0	up
LOC102159095	miscRNA			ssc:102159095	uncharacterized LOC102159095	329.6173902	0.111099728	11.53472136	0	up
LOC102159095	miscRNA			ssc:102159095	uncharacterized LOC102159095	329.6173902	0.111099728	11.53472136	0	up
LOC102159090	miscRNA			ssc:102159090	uncharacterized LOC102159090	26.20855499	0.103930585	7.978273729	1.67E-15	up
LOC102159090	miscRNA			ssc:102159090	uncharacterized LOC102159090	26.20855499	0.103930585	7.978273729	1.67E-15	up
LOC102159090	miscRNA			ssc:102159090	uncharacterized LOC102159090	26.20855499	0.103930585	7.978273729	1.67E-15	up
LOC102163591	miscRNA			ssc:102163591	uncharacterized LOC102163591	1652.689193	1.868841498	9.788455505	0	up
LOC102163591	miscRNA			ssc:102163591	uncharacterized LOC102163591	1652.689193	1.868841498	9.788455505	0	up
LOC102163591	miscRNA			ssc:102163591	uncharacterized LOC102163591	1652.689193	1.868841498	9.788455505	0	up
LOC102166621	miscRNA			ssc:102166621	uncharacterized LOC102166621	230.9840853	0.111099728	11.02172246	0	up
LOC102166621	miscRNA			ssc:102166621	uncharacterized LOC102166621	230.9840853	0.111099728	11.02172246	0	up
LOC102166621	miscRNA			ssc:102166621	uncharacterized LOC102166621	230.9840853	0.111099728	11.02172246	0	up
LOC100737350	miscRNA			ssc:100737350	uncharacterized LOC100737350	550.6703226	0.69650411	9.626841279	0	up
LOC100737350	miscRNA			ssc:100737350	uncharacterized LOC100737350	550.6703226	0.69650411	9.626841279	0	up
LOC100737350	miscRNA			ssc:100737350	uncharacterized LOC100737350	550.6703226	0.69650411	9.626841279	0	up
LOC102163189	miscRNA			ssc:102163189	uncharacterized LOC102163189	78.81944355	0.213651415	8.527148881	0	up
LOC102163189	miscRNA			ssc:102163189	uncharacterized LOC102163189	78.81944355	0.213651415	8.527148881	0	up
LOC102163189	miscRNA			ssc:102163189	uncharacterized LOC102163189	78.81944355	0.213651415	8.527148881	0	up
LOC102167538	miscRNA			ssc:102167538	uncharacterized LOC102167538	163.8398021	2.13666388	6.260782094	0	up
LOC102167538	miscRNA			ssc:102167538	uncharacterized LOC102167538	163.8398021	2.13666388	6.260782094	0	up
LOC102167538	miscRNA			ssc:102167538	uncharacterized LOC102167538	163.8398021	2.13666388	6.260782094	0	up
LOC102163163	miscRNA			ssc:102163163	uncharacterized LOC102163163	15.74451085	0.055549864	8.146849844	7.01E-04	up
LOC102163163	miscRNA			ssc:102163163	uncharacterized LOC102163163	15.74451085	0.055549864	8.146849844	7.01E-04	up
LOC102163163	miscRNA			ssc:102163163	uncharacterized LOC102163163	15.74451085	0.055549864	8.146849844	7.01E-04	up
LOC102165345	miscRNA			ssc:102165345	uncharacterized LOC102165345	133.2227841	4.274806787	4.961837813	0	up
LOC102165345	miscRNA			ssc:102165345	uncharacterized LOC102165345	133.2227841	4.274806787	4.961837813	0	up
LOC102165345	miscRNA			ssc:102165345	uncharacterized LOC102165345	133.2227841	4.274806787	4.961837813	0	up
LOC102165336	miscRNA			ssc:102165336	uncharacterized LOC102165336	54.54867452	1.307402885	5.38276845	0	up
LOC102165336	miscRNA			ssc:102165336	uncharacterized LOC102165336	54.54867452	1.307402885	5.38276845	0	up
LOC102165336	miscRNA			ssc:102165336	uncharacterized LOC102165336	54.54867452	1.307402885	5.38276845	0	up
LOC102161369	miscRNA			ssc:102161369	uncharacterized LOC102161369	254.6735186	0.386091253	9.365491369	0	up
LOC102161369	miscRNA			ssc:102161369	uncharacterized LOC102161369	254.6735186	0.386091253	9.365491369	0	up
LOC102161369	miscRNA			ssc:102161369	uncharacterized LOC102161369	254.6735186	0.386091253	9.365491369	0	up
LOC102164870	miscRNA			ssc:102164870	uncharacterized LOC102164870	264.3624483	0.800434694	8.367517846	0	up
LOC102164870	miscRNA			ssc:102164870	uncharacterized LOC102164870	264.3624483	0.800434694	8.367517846	0	up
LOC102164870	miscRNA			ssc:102164870	uncharacterized LOC102164870	264.3624483	0.800434694	8.367517846	0	up
LOC102165714	miscRNA			ssc:102165714	uncharacterized LOC102165714	356.0197238	0.64371204	9.111326001	0	up
LOC102165714	miscRNA			ssc:102165714	uncharacterized LOC102165714	356.0197238	0.64371204	9.111326001	0	up
LOC102165714	miscRNA			ssc:102165714	uncharacterized LOC102165714	356.0197238	0.64371204	9.111326001	0	up
LOC102161351	miscRNA			ssc:102161351	uncharacterized LOC102161351	132.9321162	0.324751143	8.677139381	0	up
LOC102161351	miscRNA			ssc:102161351	uncharacterized LOC102161351	132.9321162	0.324751143	8.677139381	0	up
LOC102161351	miscRNA			ssc:102161351	uncharacterized LOC102161351	132.9321162	0.324751143	8.677139381	0	up
LOC102162675	miscRNA			ssc:102162675	uncharacterized LOC102162675	37.59304745	0.304622611	6.94729903	1.27E-08	up
LOC102162675	miscRNA			ssc:102162675	uncharacterized LOC102162675	37.59304745	0.304622611	6.94729903	1.27E-08	up
LOC102162675	miscRNA			ssc:102162675	uncharacterized LOC102162675	37.59304745	0.304622611	6.94729903	1.27E-08	up
LOC102165703	miscRNA			ssc:102165703	uncharacterized LOC102165703	315.9075546	0.32613004	9.919839387	0	up
LOC102165703	miscRNA			ssc:102165703	uncharacterized LOC102165703	315.9075546	0.32613004	9.919839387	0	up
LOC102165703	miscRNA			ssc:102165703	uncharacterized LOC102165703	315.9075546	0.32613004	9.919839387	0	up
LOC102162671	miscRNA			ssc:102162671	uncharacterized LOC102162671	46.07086098	1.34999336	5.092830343	1.21E-09	up
LOC102162671	miscRNA			ssc:102162671	uncharacterized LOC102162671	46.07086098	1.34999336	5.092830343	1.21E-09	up
LOC102162671	miscRNA			ssc:102162671	uncharacterized LOC102162671	46.07086098	1.34999336	5.092830343	1.21E-09	up
LOC102159496	miscRNA			ssc:102159496	uncharacterized LOC102159496	60.74958956	0.200692026	8.241747554	0	up
LOC102159496	miscRNA			ssc:102159496	uncharacterized LOC102159496	60.74958956	0.200692026	8.241747554	0	up
LOC102159496	miscRNA			ssc:102159496	uncharacterized LOC102159496	60.74958956	0.200692026	8.241747554	0	up
LOC102161336	miscRNA			ssc:102161336	uncharacterized LOC102161336	23.98010114	0.103930585	7.850073661	1.29E-06	up
LOC102161336	miscRNA			ssc:102161336	uncharacterized LOC102161336	23.98010114	0.103930585	7.850073661	1.29E-06	up
LOC102161336	miscRNA			ssc:102161336	uncharacterized LOC102161336	23.98010114	0.103930585	7.850073661	1.29E-06	up
LOC102160483	miscRNA			ssc:102160483	uncharacterized LOC102160483	13.6129463	0.166649592	6.352017755	2.59E-07	up
LOC102160483	miscRNA			ssc:102160483	uncharacterized LOC102160483	13.6129463	0.166649592	6.352017755	2.59E-07	up
LOC102160483	miscRNA			ssc:102160483	uncharacterized LOC102160483	13.6129463	0.166649592	6.352017755	2.59E-07	up
LOC102160483	miscRNA			ssc:102160483	uncharacterized LOC102160483	13.6129463	0.166649592	6.352017755	2.59E-07	up
LOC100516601	miscRNA			ssc:100516601	uncharacterized LOC100516601	100.7648694	31.1267876	1.694764149	0.002133902	up
LOC100516601	miscRNA			ssc:100516601	uncharacterized LOC100516601	100.7648694	31.1267876	1.694764149	0.002133902	up
LOC100516601	miscRNA			ssc:100516601	uncharacterized LOC100516601	100.7648694	31.1267876	1.694764149	0.002133902	up
LOC102167945	miscRNA			ssc:102167945	uncharacterized LOC102167945	15.84140015	0.474304654	5.06174202	0.019475257	up
LOC102167945	miscRNA			ssc:102167945	uncharacterized LOC102167945	15.84140015	0.474304654	5.06174202	0.019475257	up
LOC102167945	miscRNA			ssc:102167945	uncharacterized LOC102167945	15.84140015	0.474304654	5.06174202	0.019475257	up
LOC102167945	miscRNA			ssc:102167945	uncharacterized LOC102167945	15.84140015	0.474304654	5.06174202	0.019475257	up
LOC102164430	miscRNA			ssc:102164430	uncharacterized LOC102164430	34.54103457	0	20	0	up
LOC102164430	miscRNA			ssc:102164430	uncharacterized LOC102164430	34.54103457	0	20	0	up
LOC102164430	miscRNA			ssc:102164430	uncharacterized LOC102164430	34.54103457	0	20	0	up
LOC100516635	miscRNA			ssc:100516635	uncharacterized LOC100516635	10.60937808	1.051160995	3.335284535	2.37E-04	up
LOC100516635	miscRNA			ssc:100516635	uncharacterized LOC100516635	10.60937808	1.051160995	3.335284535	2.37E-04	up
LOC100516635	miscRNA			ssc:100516635	uncharacterized LOC100516635	10.60937808	1.051160995	3.335284535	2.37E-04	up
LOC102164425	miscRNA			ssc:102164425	uncharacterized LOC102164425	297.6923667	1.074047322	8.11462086	0	up
LOC102164425	miscRNA			ssc:102164425	uncharacterized LOC102164425	297.6923667	1.074047322	8.11462086	0	up
LOC102164425	miscRNA			ssc:102164425	uncharacterized LOC102164425	297.6923667	1.074047322	8.11462086	0	up
LOC102167937	miscRNA			ssc:102167937	uncharacterized LOC102167937	218.340032	1.569160365	7.120440058	0	up
LOC102167937	miscRNA			ssc:102167937	uncharacterized LOC102167937	218.340032	1.569160365	7.120440058	0	up
LOC102167937	miscRNA			ssc:102167937	uncharacterized LOC102167937	218.340032	1.569160365	7.120440058	0	up
LOC102167922	miscRNA			ssc:102167922	uncharacterized LOC102167922	72.47319456	0.32613004	7.795856342	0	up
LOC102167922	miscRNA			ssc:102167922	uncharacterized LOC102167922	72.47319456	0.32613004	7.795856342	0	up
LOC102167922	miscRNA			ssc:102167922	uncharacterized LOC102167922	72.47319456	0.32613004	7.795856342	0	up
LOC102167924	miscRNA			ssc:102167924	uncharacterized LOC102167924	26.20855499	0	20	2.22E-13	up
LOC102167924	miscRNA			ssc:102167924	uncharacterized LOC102167924	26.20855499	0	20	2.22E-13	up
LOC102167924	miscRNA			ssc:102167924	uncharacterized LOC102167924	26.20855499	0	20	2.22E-13	up
LOC102164409	miscRNA			ssc:102164409	uncharacterized LOC102164409	192.3252556	0.871701742	7.785497918	0	up
LOC102164409	miscRNA			ssc:102164409	uncharacterized LOC102164409	192.3252556	0.871701742	7.785497918	0	up
LOC102164409	miscRNA			ssc:102164409	uncharacterized LOC102164409	192.3252556	0.871701742	7.785497918	0	up
LOC102165733	miscRNA			ssc:102165733	patched domain-containing protein 3-like	47.2819772	9.886223161	2.257798989	1.05E-07	up
LOC102165733	miscRNA			ssc:102165733	patched domain-containing protein 3-like	47.2819772	9.886223161	2.257798989	1.05E-07	up
LOC102165733	miscRNA			ssc:102165733	patched domain-containing protein 3-like	47.2819772	9.886223161	2.257798989	1.05E-07	up
LOC102164403	miscRNA			ssc:102164403	uncharacterized LOC102164403	252.541954	0.98280147	8.005407348	0	up
LOC102164403	miscRNA			ssc:102164403	uncharacterized LOC102164403	252.541954	0.98280147	8.005407348	0	up
LOC102164403	miscRNA			ssc:102164403	uncharacterized LOC102164403	252.541954	0.98280147	8.005407348	0	up
LOC102161371	miscRNA			ssc:102161371	uncharacterized LOC102161371	166.891815	0.274991525	9.24531033	0	up
LOC102161371	miscRNA			ssc:102161371	uncharacterized LOC102161371	166.891815	0.274991525	9.24531033	0	up
LOC102161371	miscRNA			ssc:102161371	uncharacterized LOC102161371	166.891815	0.274991525	9.24531033	0	up
LOC102167177	miscRNA	chr5:16183338-16197396	-	ssc:102167177	uncharacterized LOC102167177	115.5404873	1.642780007	6.13611538	0	up
LOC102167177	miscRNA	chr5:16183338-16197396	-	ssc:102167177	uncharacterized LOC102167177	115.5404873	1.642780007	6.13611538	0	up
LOC102167177	miscRNA	chr5:16183338-16197396	-	ssc:102167177	uncharacterized LOC102167177	115.5404873	1.642780007	6.13611538	0	up
LOC100524164	miscRNA			ssc:100524164	uncharacterized LOC100524164	46.02241633	0.159480449	8.172813353	8.10E-15	up
LOC100524164	miscRNA			ssc:100524164	uncharacterized LOC100524164	46.02241633	0.159480449	8.172813353	8.10E-15	up
LOC100524164	miscRNA			ssc:100524164	uncharacterized LOC100524164	46.02241633	0.159480449	8.172813353	8.10E-15	up
LOC102168010	miscRNA			ssc:102168010	uncharacterized LOC102168010	40.83883891	0.055549864	9.521942757	0	up
LOC102168010	miscRNA			ssc:102168010	uncharacterized LOC102168010	40.83883891	0.055549864	9.521942757	0	up
LOC102168010	miscRNA			ssc:102168010	uncharacterized LOC102168010	40.83883891	0.055549864	9.521942757	0	up
LOC102168008	miscRNA			ssc:102168008	uncharacterized LOC102168008	326.759156	1.726157675	7.564519599	0	up
LOC102168008	miscRNA			ssc:102168008	uncharacterized LOC102168008	326.759156	1.726157675	7.564519599	0	up
LOC102168008	miscRNA			ssc:102168008	uncharacterized LOC102168008	326.759156	1.726157675	7.564519599	0	up
LOC102167157	miscRNA			ssc:102167157	uncharacterized LOC102167157	22.09075984	0	20	5.25E-12	up
LOC102167157	miscRNA			ssc:102167157	uncharacterized LOC102167157	22.09075984	0	20	5.25E-12	up
LOC102167157	miscRNA			ssc:102167157	uncharacterized LOC102167157	22.09075984	0	20	5.25E-12	up
LOC102161443	miscRNA			ssc:102161443	uncharacterized LOC102161443	16.71340383	1.778949744	3.231907921	0.040992394	up
LOC102161443	miscRNA			ssc:102161443	uncharacterized LOC102161443	16.71340383	1.778949744	3.231907921	0.040992394	up
LOC102161443	miscRNA			ssc:102161443	uncharacterized LOC102161443	16.71340383	1.778949744	3.231907921	0.040992394	up
LOC102161443	miscRNA			ssc:102161443	uncharacterized LOC102161443	16.71340383	1.778949744	3.231907921	0.040992394	up
LOC102160107	miscRNA			ssc:102160107	uncharacterized LOC102160107	406.4506032	2.7760895	7.193882138	0	up
LOC102160107	miscRNA			ssc:102160107	uncharacterized LOC102160107	406.4506032	2.7760895	7.193882138	0	up
LOC102160107	miscRNA			ssc:102160107	uncharacterized LOC102160107	406.4506032	2.7760895	7.193882138	0	up
LOC102160104	miscRNA			ssc:102160104	uncharacterized LOC102160104	269.8851383	1.547122806	7.446614006	0	up
LOC102160104	miscRNA			ssc:102160104	uncharacterized LOC102160104	269.8851383	1.547122806	7.446614006	0	up
LOC102160104	miscRNA			ssc:102160104	uncharacterized LOC102160104	269.8851383	1.547122806	7.446614006	0	up
LOC102164943	miscRNA			ssc:102164943	uncharacterized LOC102164943	216.1115782	0.933041852	7.855618857	0	up
LOC102164943	miscRNA			ssc:102164943	uncharacterized LOC102164943	216.1115782	0.933041852	7.855618857	0	up
LOC102164943	miscRNA			ssc:102164943	uncharacterized LOC102164943	216.1115782	0.933041852	7.855618857	0	up
LOC102159583	miscRNA			ssc:102159583	uncharacterized LOC102159583	59.73225194	0	20	0	up
LOC102159583	miscRNA			ssc:102159583	uncharacterized LOC102159583	59.73225194	0	20	0	up
LOC102159583	miscRNA			ssc:102159583	uncharacterized LOC102159583	59.73225194	0	20	0	up
LOC102162751	miscRNA			ssc:102162751	uncharacterized LOC102162751	200.6092906	0.222199456	9.818317423	0	up
LOC102162751	miscRNA			ssc:102162751	uncharacterized LOC102162751	200.6092906	0.222199456	9.818317423	0	up
LOC102162751	miscRNA			ssc:102162751	uncharacterized LOC102162751	200.6092906	0.222199456	9.818317423	0	up
LOC102159104	miscRNA			ssc:102159104	uncharacterized LOC102159104	626.7284212	0.769150054	9.67035962	0	up
LOC102159104	miscRNA			ssc:102159104	uncharacterized LOC102159104	626.7284212	0.769150054	9.67035962	0	up
LOC102159104	miscRNA			ssc:102159104	uncharacterized LOC102159104	626.7284212	0.769150054	9.67035962	0	up
LOC102159586	miscRNA			ssc:102159586	uncharacterized LOC102159586	131.2849982	1.514034885	6.438159813	0	up
LOC102159586	miscRNA			ssc:102159586	uncharacterized LOC102159586	131.2849982	1.514034885	6.438159813	0	up
LOC102159586	miscRNA			ssc:102159586	uncharacterized LOC102159586	131.2849982	1.514034885	6.438159813	0	up
LOC102158240	miscRNA			ssc:102158240	uncharacterized LOC102158240	134.1916771	1.039730231	7.01194213	0	up
LOC102158240	miscRNA			ssc:102158240	uncharacterized LOC102158240	134.1916771	1.039730231	7.01194213	0	up
LOC102158240	miscRNA			ssc:102158240	uncharacterized LOC102158240	134.1916771	1.039730231	7.01194213	0	up
LOC102161412	miscRNA			ssc:102161412	uncharacterized LOC102161412	11.62671571	0	20	0.001320656	up
LOC102161412	miscRNA			ssc:102161412	uncharacterized LOC102161412	11.62671571	0	20	0.001320656	up
LOC102161412	miscRNA			ssc:102161412	uncharacterized LOC102161412	11.62671571	0	20	0.001320656	up
LOC102160560	miscRNA			ssc:102160560	uncharacterized LOC102160560	41.95306584	1.762003391	4.573487638	3.06E-12	up
LOC102160560	miscRNA			ssc:102160560	uncharacterized LOC102160560	41.95306584	1.762003391	4.573487638	3.06E-12	up
LOC102160560	miscRNA			ssc:102160560	uncharacterized LOC102160560	41.95306584	1.762003391	4.573487638	3.06E-12	up
LOC100620820	miscRNA			ssc:100620820	uncharacterized LOC100620820	15.6960662	0.572444993	4.777122153	4.63E-05	up
LOC100620820	miscRNA			ssc:100620820	uncharacterized LOC100620820	15.6960662	0.572444993	4.777122153	4.63E-05	up
LOC100620820	miscRNA			ssc:100620820	uncharacterized LOC100620820	15.6960662	0.572444993	4.777122153	4.63E-05	up
LOC102167575	miscRNA			ssc:102167575	uncharacterized LOC102167575	140.828594	2.6804323	5.715330783	0	up
LOC102167575	miscRNA			ssc:102167575	uncharacterized LOC102167575	140.828594	2.6804323	5.715330783	0	up
LOC102167575	miscRNA			ssc:102167575	uncharacterized LOC102167575	140.828594	2.6804323	5.715330783	0	up
LOC100519203	miscRNA			ssc:100519203	uncharacterized LOC100519203	27.27433726	0.563896952	5.595968785	2.62E-13	up
LOC100519203	miscRNA			ssc:100519203	uncharacterized LOC100519203	27.27433726	0.563896952	5.595968785	2.62E-13	up
LOC100519203	miscRNA			ssc:100519203	uncharacterized LOC100519203	27.27433726	0.563896952	5.595968785	2.62E-13	up
LOC102158616	miscRNA			ssc:102158616	uncharacterized LOC102158616	60.55581096	0.370374069	7.353138503	5.50E-11	up
LOC102158616	miscRNA			ssc:102158616	uncharacterized LOC102158616	60.55581096	0.370374069	7.353138503	5.50E-11	up
LOC102158616	miscRNA			ssc:102158616	uncharacterized LOC102158616	60.55581096	0.370374069	7.353138503	5.50E-11	up
LOC102157765	miscRNA			ssc:102157765	uncharacterized LOC102157765	64.964274	0.516895129	6.973631134	0	up
LOC102157765	miscRNA			ssc:102157765	uncharacterized LOC102157765	64.964274	0.516895129	6.973631134	0	up
LOC102157765	miscRNA			ssc:102157765	uncharacterized LOC102157765	64.964274	0.516895129	6.973631134	0	up
LOC102167552	miscRNA			ssc:102167552	uncharacterized LOC102167552	14.67872858	0.158101551	6.536731679	2.32E-09	up
LOC102167552	miscRNA			ssc:102167552	uncharacterized LOC102167552	14.67872858	0.158101551	6.536731679	2.32E-09	up
LOC102167552	miscRNA			ssc:102167552	uncharacterized LOC102167552	14.67872858	0.158101551	6.536731679	2.32E-09	up
LOC102164041	miscRNA			ssc:102164041	uncharacterized LOC102164041	410.471509	2.976931254	7.107312371	0	up
LOC102164041	miscRNA			ssc:102164041	uncharacterized LOC102164041	410.471509	2.976931254	7.107312371	0	up
LOC102164041	miscRNA			ssc:102164041	uncharacterized LOC102164041	410.471509	2.976931254	7.107312371	0	up
LOC100518349	miscRNA			ssc:100518349	uncharacterized LOC100518349	80.8541188	0.420133687	7.588328989	0	up
LOC100518349	miscRNA			ssc:100518349	uncharacterized LOC100518349	80.8541188	0.420133687	7.588328989	0	up
LOC100518349	miscRNA			ssc:100518349	uncharacterized LOC100518349	80.8541188	0.420133687	7.588328989	0	up
LOC102157756	miscRNA			ssc:102157756	uncharacterized LOC102157756	106.0453362	1.260550789	6.394483115	0	up
LOC102157756	miscRNA			ssc:102157756	uncharacterized LOC102157756	106.0453362	1.260550789	6.394483115	0	up
LOC102157756	miscRNA			ssc:102157756	uncharacterized LOC102157756	106.0453362	1.260550789	6.394483115	0	up
LOC100739170	miscRNA			ssc:100739170	uncharacterized LOC100739170	94.757733	17.42366527	2.443195541	1.11E-13	up
LOC100739170	miscRNA			ssc:100739170	uncharacterized LOC100739170	94.757733	17.42366527	2.443195541	1.11E-13	up
LOC100739170	miscRNA			ssc:100739170	uncharacterized LOC100739170	94.757733	17.42366527	2.443195541	1.11E-13	up
LOC102158670	miscRNA			ssc:102158670	uncharacterized LOC102158670	335.8667499	0.371752966	9.819329009	0	up
LOC102158670	miscRNA			ssc:102158670	uncharacterized LOC102158670	335.8667499	0.371752966	9.819329009	0	up
LOC102158670	miscRNA			ssc:102158670	uncharacterized LOC102158670	335.8667499	0.371752966	9.819329009	0	up
LOC102159524	miscRNA			ssc:102159524	uncharacterized LOC102159524	21.99387054	0.417375893	5.719610432	9.07E-09	up
LOC102159524	miscRNA			ssc:102159524	uncharacterized LOC102159524	21.99387054	0.417375893	5.719610432	9.07E-09	up
LOC102159524	miscRNA			ssc:102159524	uncharacterized LOC102159524	21.99387054	0.417375893	5.719610432	9.07E-09	up
LOC102160501	miscRNA			ssc:102160501	uncharacterized LOC102160501	54.54867452	0.589541074	6.531808	0	up
LOC102160501	miscRNA			ssc:102160501	uncharacterized LOC102160501	54.54867452	0.589541074	6.531808	0	up
LOC102160501	miscRNA			ssc:102160501	uncharacterized LOC102160501	54.54867452	0.589541074	6.531808	0	up
LOC102167133	miscRNA			ssc:102167133	uncharacterized LOC102167133	21.99387054	0.055549864	8.629102423	2.18E-12	up
LOC102167133	miscRNA			ssc:102167133	uncharacterized LOC102167133	21.99387054	0.055549864	8.629102423	2.18E-12	up
LOC102167133	miscRNA			ssc:102167133	uncharacterized LOC102167133	21.99387054	0.055549864	8.629102423	2.18E-12	up
LOC102160976	miscRNA			ssc:102160976	uncharacterized LOC102160976	658.2658875	1.26358324	9.025005919	0	up
LOC102160976	miscRNA			ssc:102160976	uncharacterized LOC102160976	658.2658875	1.26358324	9.025005919	0	up
LOC102160976	miscRNA			ssc:102160976	uncharacterized LOC102160976	658.2658875	1.26358324	9.025005919	0	up
LOC102161810	miscRNA			ssc:102161810	uncharacterized LOC102161810	111.1804689	0.220820558	8.975813164	0	up
LOC102161810	miscRNA			ssc:102161810	uncharacterized LOC102161810	111.1804689	0.220820558	8.975813164	0	up
LOC102161810	miscRNA			ssc:102161810	uncharacterized LOC102161810	111.1804689	0.220820558	8.975813164	0	up
LOC102161808	miscRNA			ssc:102161808	uncharacterized LOC102161808	238.4445613	0.708084601	8.395516419	0	up
LOC102161808	miscRNA			ssc:102161808	uncharacterized LOC102161808	238.4445613	0.708084601	8.395516419	0	up
LOC102161808	miscRNA			ssc:102161808	uncharacterized LOC102161808	238.4445613	0.708084601	8.395516419	0	up
LOC102164358	miscRNA			ssc:102164358	uncharacterized LOC102164358	7.315141965	0.055549864	7.040958675	3.56E-04	up
LOC102164358	miscRNA			ssc:102164358	uncharacterized LOC102164358	7.315141965	0.055549864	7.040958675	3.56E-04	up
LOC102164358	miscRNA			ssc:102164358	uncharacterized LOC102164358	7.315141965	0.055549864	7.040958675	3.56E-04	up
LOC102165204	miscRNA			ssc:102165204	uncharacterized LOC102165204	151.2441935	0.331920286	8.831827234	0	up
LOC102165204	miscRNA			ssc:102165204	uncharacterized LOC102165204	151.2441935	0.331920286	8.831827234	0	up
LOC102165204	miscRNA			ssc:102165204	uncharacterized LOC102165204	151.2441935	0.331920286	8.831827234	0	up
LOC102166531	miscRNA			ssc:102166531	uncharacterized LOC102166531	253.9468489	30.21174019	3.071345381	1.35E-10	up
LOC102166531	miscRNA			ssc:102166531	uncharacterized LOC102166531	253.9468489	30.21174019	3.071345381	1.35E-10	up
LOC102166531	miscRNA			ssc:102166531	uncharacterized LOC102166531	253.9468489	30.21174019	3.071345381	1.35E-10	up
LOC102164347	miscRNA			ssc:102164347	uncharacterized LOC102164347	22.09075984	0.156722654	7.139085499	4.14E-09	up
LOC102164347	miscRNA			ssc:102164347	uncharacterized LOC102164347	22.09075984	0.156722654	7.139085499	4.14E-09	up
LOC102164347	miscRNA			ssc:102164347	uncharacterized LOC102164347	22.09075984	0.156722654	7.139085499	4.14E-09	up
LOC102164344	miscRNA			ssc:102164344	uncharacterized LOC102164344	182.6363259	0.980043675	7.541911983	0	up
LOC102164344	miscRNA			ssc:102164344	uncharacterized LOC102164344	182.6363259	0.980043675	7.541911983	0	up
LOC102164344	miscRNA			ssc:102164344	uncharacterized LOC102164344	182.6363259	0.980043675	7.541911983	0	up
LOC102165675	miscRNA			ssc:102165675	uncharacterized LOC102165675	80.7572295	0.433093076	7.542770499	0	up
LOC102165675	miscRNA			ssc:102165675	uncharacterized LOC102165675	80.7572295	0.433093076	7.542770499	0	up
LOC102165675	miscRNA			ssc:102165675	uncharacterized LOC102165675	80.7572295	0.433093076	7.542770499	0	up
LOC102165672	miscRNA			ssc:102165672	uncharacterized LOC102165672	531.0986845	0.586783279	9.82193648	0	up
LOC102165672	miscRNA			ssc:102165672	uncharacterized LOC102165672	531.0986845	0.586783279	9.82193648	0	up
LOC102165672	miscRNA			ssc:102165672	uncharacterized LOC102165672	531.0986845	0.586783279	9.82193648	0	up
LOC102163496	miscRNA			ssc:102163496	uncharacterized LOC102163496	147.9499573	0.055549864	11.37903828	0	up
LOC102163496	miscRNA			ssc:102163496	uncharacterized LOC102163496	147.9499573	0.055549864	11.37903828	0	up
LOC102163496	miscRNA			ssc:102163496	uncharacterized LOC102163496	147.9499573	0.055549864	11.37903828	0	up
LOC102166990	miscRNA			ssc:102166990	uncharacterized LOC102166990	128.959655	11.92445286	3.434924813	1.77E-08	up
LOC102166990	miscRNA			ssc:102166990	uncharacterized LOC102166990	128.959655	11.92445286	3.434924813	1.77E-08	up
LOC102166990	miscRNA			ssc:102166990	uncharacterized LOC102166990	128.959655	11.92445286	3.434924813	1.77E-08	up
LOC102165663	miscRNA			ssc:102165663	uncharacterized LOC102165663	30.42323943	0.109720831	8.11519252	0	up
LOC102165663	miscRNA			ssc:102165663	uncharacterized LOC102165663	30.42323943	0.109720831	8.11519252	0	up
LOC102165663	miscRNA			ssc:102165663	uncharacterized LOC102165663	30.42323943	0.109720831	8.11519252	0	up
LOC102162144	miscRNA			ssc:102162144	uncharacterized LOC102162144	738.9746724	0.742127036	9.959643038	0	up
LOC102162144	miscRNA			ssc:102162144	uncharacterized LOC102162144	738.9746724	0.742127036	9.959643038	0	up
LOC102162144	miscRNA			ssc:102162144	uncharacterized LOC102162144	738.9746724	0.742127036	9.959643038	0	up
LOC100156682	miscRNA	chr7:96086769-96089456	+	ssc:100156682	transmembrane protein 106B pseudogene	20.97653292	2.834522088	2.887598827	1.35E-04	up
LOC100156682	miscRNA	chr7:96086769-96089456	+	ssc:100156682	transmembrane protein 106B pseudogene	20.97653292	2.834522088	2.887598827	1.35E-04	up
LOC100156682	miscRNA	chr7:96086769-96089456	+	ssc:100156682	transmembrane protein 106B pseudogene	20.97653292	2.834522088	2.887598827	1.35E-04	up
LOC102165247	miscRNA			ssc:102165247	uncharacterized LOC102165247	77.75366128	5.296062039	3.875918683	0	up
LOC102165247	miscRNA			ssc:102165247	uncharacterized LOC102165247	77.75366128	5.296062039	3.875918683	0	up
LOC102165247	miscRNA			ssc:102165247	uncharacterized LOC102165247	77.75366128	5.296062039	3.875918683	0	up
LOC102165241	miscRNA			ssc:102165241	uncharacterized LOC102165241	59.68380729	3.250244427	4.198719448	2.42E-07	up
LOC102165241	miscRNA			ssc:102165241	uncharacterized LOC102165241	59.68380729	3.250244427	4.198719448	2.42E-07	up
LOC102165241	miscRNA			ssc:102165241	uncharacterized LOC102165241	59.68380729	3.250244427	4.198719448	2.42E-07	up
LOC100153591	miscRNA			ssc:100153591	uncharacterized LOC100153591	15.6960662	0.686302515	4.515414579	1.32E-04	up
LOC100153591	miscRNA			ssc:100153591	uncharacterized LOC100153591	15.6960662	0.686302515	4.515414579	1.32E-04	up
LOC100153591	miscRNA			ssc:100153591	uncharacterized LOC100153591	15.6960662	0.686302515	4.515414579	1.32E-04	up
LOC102167898	miscRNA			ssc:102167898	uncharacterized LOC102167898	18.94185767	0.054170967	8.449842277	4.94E-08	up
LOC102167898	miscRNA			ssc:102167898	uncharacterized LOC102167898	18.94185767	0.054170967	8.449842277	4.94E-08	up
LOC102167898	miscRNA			ssc:102167898	uncharacterized LOC102167898	18.94185767	0.054170967	8.449842277	4.94E-08	up
LOC100737242	miscRNA			ssc:100737242	uncharacterized LOC100737242	79.0616668	9.624365551	3.038215026	0	up
LOC100737242	miscRNA			ssc:100737242	uncharacterized LOC100737242	79.0616668	9.624365551	3.038215026	0	up
LOC100737242	miscRNA			ssc:100737242	uncharacterized LOC100737242	79.0616668	9.624365551	3.038215026	0	up
LOC102164385	miscRNA			ssc:102164385	uncharacterized LOC102164385	17.8760754	0.159480449	6.808506656	4.07E-05	up
LOC102164385	miscRNA			ssc:102164385	uncharacterized LOC102164385	17.8760754	0.159480449	6.808506656	4.07E-05	up
LOC102164385	miscRNA			ssc:102164385	uncharacterized LOC102164385	17.8760754	0.159480449	6.808506656	4.07E-05	up
LOC100518088	miscRNA			ssc:100518088	uncharacterized LOC100518088	109.8724634	591.8808402	-2.429476897	5.84E-07	down
LOC100518088	miscRNA			ssc:100518088	uncharacterized LOC100518088	109.8724634	591.8808402	-2.429476897	5.84E-07	down
LOC100518088	miscRNA			ssc:100518088	uncharacterized LOC100518088	109.8724634	591.8808402	-2.429476897	5.84E-07	down
LOC102163041	miscRNA			ssc:102163041	uncharacterized LOC102163041	253.0264005	1.385839076	7.512384371	0	up
LOC102163041	miscRNA			ssc:102163041	uncharacterized LOC102163041	253.0264005	1.385839076	7.512384371	0	up
LOC102163041	miscRNA			ssc:102163041	uncharacterized LOC102163041	253.0264005	1.385839076	7.512384371	0	up
LOC102164371	miscRNA			ssc:102164371	uncharacterized LOC102164371	20.00763994	0.111099728	7.492551907	1.58E-08	up
LOC102164371	miscRNA			ssc:102164371	uncharacterized LOC102164371	20.00763994	0.111099728	7.492551907	1.58E-08	up
LOC102164371	miscRNA			ssc:102164371	uncharacterized LOC102164371	20.00763994	0.111099728	7.492551907	1.58E-08	up
LOC102165224	miscRNA			ssc:102165224	uncharacterized LOC102165224	29.26056786	0.159480449	7.519434389	1.50E-09	up
LOC102165224	miscRNA			ssc:102165224	uncharacterized LOC102165224	29.26056786	0.159480449	7.519434389	1.50E-09	up
LOC102165224	miscRNA			ssc:102165224	uncharacterized LOC102165224	29.26056786	0.159480449	7.519434389	1.50E-09	up
LOC102167884	miscRNA			ssc:102167884	uncharacterized LOC102167884	11.48138176	0.267822382	5.421875936	0.001277907	up
LOC102167884	miscRNA			ssc:102167884	uncharacterized LOC102167884	11.48138176	0.267822382	5.421875936	0.001277907	up
LOC102167884	miscRNA			ssc:102167884	uncharacterized LOC102167884	11.48138176	0.267822382	5.421875936	0.001277907	up
LOC102158938	miscRNA			ssc:102158938	uncharacterized LOC102158938	30.32635013	0.422891482	6.164140564	1.45E-08	up
LOC102158938	miscRNA			ssc:102158938	uncharacterized LOC102158938	30.32635013	0.422891482	6.164140564	1.45E-08	up
LOC102158938	miscRNA			ssc:102158938	uncharacterized LOC102158938	30.32635013	0.422891482	6.164140564	1.45E-08	up
LOC102157606	miscRNA			ssc:102157606	uncharacterized LOC102157606	243.5312494	1.273510178	7.579152607	0	up
LOC102157606	miscRNA			ssc:102157606	uncharacterized LOC102157606	243.5312494	1.273510178	7.579152607	0	up
LOC102157606	miscRNA			ssc:102157606	uncharacterized LOC102157606	243.5312494	1.273510178	7.579152607	0	up
LOC102166548	miscRNA			ssc:102166548	uncharacterized LOC102166548	199.7372869	0.823321021	7.922432903	0	up
LOC102166548	miscRNA			ssc:102166548	uncharacterized LOC102166548	199.7372869	0.823321021	7.922432903	0	up
LOC102166548	miscRNA			ssc:102166548	uncharacterized LOC102166548	199.7372869	0.823321021	7.922432903	0	up
LOC102166546	miscRNA			ssc:102166546	uncharacterized LOC102166546	4.166239794	0.054170967	6.265082234	0.040257061	up
LOC102166546	miscRNA			ssc:102166546	uncharacterized LOC102166546	4.166239794	0.054170967	6.265082234	0.040257061	up
LOC102166546	miscRNA			ssc:102166546	uncharacterized LOC102166546	4.166239794	0.054170967	6.265082234	0.040257061	up
LOC102158919	miscRNA			ssc:102158919	uncharacterized LOC102158919	24.12543509	2.485655448	3.278856726	3.42E-06	up
LOC102158919	miscRNA			ssc:102158919	uncharacterized LOC102158919	24.12543509	2.485655448	3.278856726	3.42E-06	up
LOC102158919	miscRNA			ssc:102158919	uncharacterized LOC102158919	24.12543509	2.485655448	3.278856726	3.42E-06	up
LOC102162188	miscRNA			ssc:102162188	uncharacterized LOC102162188	34.88014712	2.817850391	3.629739204	4.22E-15	up
LOC102162188	miscRNA			ssc:102162188	uncharacterized LOC102162188	34.88014712	2.817850391	3.629739204	4.22E-15	up
LOC102162188	miscRNA			ssc:102162188	uncharacterized LOC102162188	34.88014712	2.817850391	3.629739204	4.22E-15	up
LOC102160397	miscRNA			ssc:102160397	uncharacterized LOC102160397	809.1225238	2.156792412	8.551327048	0	up
LOC102160397	miscRNA			ssc:102160397	uncharacterized LOC102160397	809.1225238	2.156792412	8.551327048	0	up
LOC102160397	miscRNA			ssc:102160397	uncharacterized LOC102160397	809.1225238	2.156792412	8.551327048	0	up
AGL	miscRNA			ssc:100156940	amylo-alpha-1, 6-glucosidase, 4-alpha-glucanotransferase	299.6785973	139.626426	1.101844037	0.019154175	up
AGL	miscRNA			ssc:100156940	amylo-alpha-1, 6-glucosidase, 4-alpha-glucanotransferase	299.6785973	139.626426	1.101844037	0.019154175	up
AGL	miscRNA			ssc:100156940	amylo-alpha-1, 6-glucosidase, 4-alpha-glucanotransferase	299.6785973	139.626426	1.101844037	0.019154175	up
AGL	miscRNA			ssc:100156940	amylo-alpha-1, 6-glucosidase, 4-alpha-glucanotransferase	299.6785973	139.626426	1.101844037	0.019154175	up
LOC102163898	miscRNA			ssc:102163898	uncharacterized LOC102163898	12.54716403	0.111099728	6.819362223	4.83E-06	up
LOC102163898	miscRNA			ssc:102163898	uncharacterized LOC102163898	12.54716403	0.111099728	6.819362223	4.83E-06	up
LOC102163898	miscRNA			ssc:102163898	uncharacterized LOC102163898	12.54716403	0.111099728	6.819362223	4.83E-06	up
LOC102163898	miscRNA			ssc:102163898	uncharacterized LOC102163898	12.54716403	0.111099728	6.819362223	4.83E-06	up
LOC102159385	miscRNA			ssc:102159385	uncharacterized LOC102159385	160.8846786	2.270500207	6.146872963	0	up
LOC102159385	miscRNA			ssc:102159385	uncharacterized LOC102159385	160.8846786	2.270500207	6.146872963	0	up
LOC102159385	miscRNA			ssc:102159385	uncharacterized LOC102159385	160.8846786	2.270500207	6.146872963	0	up
LOC102162557	miscRNA			ssc:102162557	uncharacterized LOC102162557	34.63792387	0.490021837	6.143362607	0	up
LOC102162557	miscRNA			ssc:102162557	uncharacterized LOC102162557	34.63792387	0.490021837	6.143362607	0	up
LOC102162557	miscRNA			ssc:102162557	uncharacterized LOC102162557	34.63792387	0.490021837	6.143362607	0	up
LOC102164737	miscRNA			ssc:102164737	uncharacterized LOC102164737	377.0447014	2.854675419	7.045265047	0	up
LOC102164737	miscRNA			ssc:102164737	uncharacterized LOC102164737	377.0447014	2.854675419	7.045265047	0	up
LOC102164737	miscRNA			ssc:102164737	uncharacterized LOC102164737	377.0447014	2.854675419	7.045265047	0	up
LOC102164728	miscRNA			ssc:102164728	uncharacterized LOC102164728	63.94693638	1.253231919	5.673149919	0	up
LOC102164728	miscRNA			ssc:102164728	uncharacterized LOC102164728	63.94693638	1.253231919	5.673149919	0	up
LOC102164728	miscRNA			ssc:102164728	uncharacterized LOC102164728	63.94693638	1.253231919	5.673149919	0	up
LOC100518908	miscRNA			ssc:100518908	methyl-CpG-binding domain protein 6-like	49.51043104	9.134599186	2.438319178	0.002779829	up
LOC100518908	miscRNA			ssc:100518908	methyl-CpG-binding domain protein 6-like	49.51043104	9.134599186	2.438319178	0.002779829	up
LOC100518908	miscRNA			ssc:100518908	methyl-CpG-binding domain protein 6-like	49.51043104	9.134599186	2.438319178	0.002779829	up
LOC102162139	miscRNA			ssc:102162139	uncharacterized LOC102162139	21.99387054	0.166649592	7.044139922	6.38E-11	up
LOC102162139	miscRNA			ssc:102162139	uncharacterized LOC102162139	21.99387054	0.166649592	7.044139922	6.38E-11	up
LOC102162139	miscRNA			ssc:102162139	uncharacterized LOC102162139	21.99387054	0.166649592	7.044139922	6.38E-11	up
LOC102164790	miscRNA			ssc:102164790	uncharacterized LOC102164790	112.5853637	0.159480449	9.463424003	0	up
LOC102164790	miscRNA			ssc:102164790	uncharacterized LOC102164790	112.5853637	0.159480449	9.463424003	0	up
LOC102164790	miscRNA			ssc:102164790	uncharacterized LOC102164790	112.5853637	0.159480449	9.463424003	0	up
LOC102166971	miscRNA			ssc:102166971	uncharacterized LOC102166971	26.11166569	0.111099728	7.876695399	8.72E-09	up
LOC102166971	miscRNA			ssc:102166971	uncharacterized LOC102166971	26.11166569	0.111099728	7.876695399	8.72E-09	up
LOC102166971	miscRNA			ssc:102166971	uncharacterized LOC102166971	26.11166569	0.111099728	7.876695399	8.72E-09	up
LOC102164305	miscRNA			ssc:102164305	uncharacterized LOC102164305	141.6037084	0.331920286	8.736806526	0	up
LOC102164305	miscRNA			ssc:102164305	uncharacterized LOC102164305	141.6037084	0.331920286	8.736806526	0	up
LOC102164305	miscRNA			ssc:102164305	uncharacterized LOC102164305	141.6037084	0.331920286	8.736806526	0	up
LOC100525247	miscRNA			ssc:100525247	uncharacterized LOC100525247	20.97653292	0	20	3.88E-09	up
LOC100525247	miscRNA			ssc:100525247	uncharacterized LOC100525247	20.97653292	0	20	3.88E-09	up
LOC100525247	miscRNA			ssc:100525247	uncharacterized LOC100525247	20.97653292	0	20	3.88E-09	up
LOC100525247	miscRNA			ssc:100525247	uncharacterized LOC100525247	20.97653292	0	20	3.88E-09	up
LOC100737643	miscRNA			ssc:100737643	uncharacterized LOC100737643	38.75571902	6.371319347	2.604745162	0.006581362	up
LOC100737643	miscRNA			ssc:100737643	uncharacterized LOC100737643	38.75571902	6.371319347	2.604745162	0.006581362	up
LOC100737643	miscRNA			ssc:100737643	uncharacterized LOC100737643	38.75571902	6.371319347	2.604745162	0.006581362	up
LOC100518921	miscRNA	chr9:79239881-79316977	-	ssc:100518921	cyclin-dependent kinase 6-like	13.6129463	114.4963918	-3.07225088	0.010281792	down
LOC100518921	miscRNA	chr9:79239881-79316977	-	ssc:100518921	cyclin-dependent kinase 6-like	13.6129463	114.4963918	-3.07225088	0.010281792	down
LOC100518921	miscRNA	chr9:79239881-79316977	-	ssc:100518921	cyclin-dependent kinase 6-like	13.6129463	114.4963918	-3.07225088	0.010281792	down
LOC100518921	miscRNA	chr9:79239881-79316977	-	ssc:100518921	cyclin-dependent kinase 6-like	13.6129463	114.4963918	-3.07225088	0.010281792	down
LOC102164775	miscRNA			ssc:102164775	uncharacterized LOC102164775	86.86125525	0.103930585	9.706948718	0	up
LOC102164775	miscRNA			ssc:102164775	uncharacterized LOC102164775	86.86125525	0.103930585	9.706948718	0	up
LOC102164775	miscRNA			ssc:102164775	uncharacterized LOC102164775	86.86125525	0.103930585	9.706948718	0	up
LOC102162117	miscRNA			ssc:102162117	uncharacterized LOC102162117	1281.700073	2.284688765	9.131845339	0	up
LOC102162117	miscRNA			ssc:102162117	uncharacterized LOC102162117	1281.700073	2.284688765	9.131845339	0	up
LOC102162117	miscRNA			ssc:102162117	uncharacterized LOC102162117	1281.700073	2.284688765	9.131845339	0	up
LOC102162594	miscRNA			ssc:102162594	uncharacterized LOC102162594	265.5735646	0.32613004	9.669448495	0	up
LOC102162594	miscRNA			ssc:102162594	uncharacterized LOC102162594	265.5735646	0.32613004	9.669448495	0	up
LOC102162594	miscRNA			ssc:102162594	uncharacterized LOC102162594	265.5735646	0.32613004	9.669448495	0	up
LOC102158593	miscRNA			ssc:102158593	uncharacterized LOC102158593	23.05965282	0.055549864	8.697371699	1.60E-14	up
LOC102158593	miscRNA			ssc:102158593	uncharacterized LOC102158593	23.05965282	0.055549864	8.697371699	1.60E-14	up
LOC102158593	miscRNA			ssc:102158593	uncharacterized LOC102158593	23.05965282	0.055549864	8.697371699	1.60E-14	up
LOC102158593	miscRNA			ssc:102158593	uncharacterized LOC102158593	23.05965282	0.055549864	8.697371699	1.60E-14	up
LOC100736861	miscRNA			ssc:100736861	uncharacterized LOC100736861	462.0166153	3.930101638	6.877234302	0	up
LOC100736861	miscRNA			ssc:100736861	uncharacterized LOC100736861	462.0166153	3.930101638	6.877234302	0	up
LOC100736861	miscRNA			ssc:100736861	uncharacterized LOC100736861	462.0166153	3.930101638	6.877234302	0	up
LOC100515348	miscRNA	chr16:22570304-22570792	+	ssc:100515348	40S ribosomal protein S24-like	35.6552615	0.311791754	6.837388401	0	up
LOC100515348	miscRNA	chr16:22570304-22570792	+	ssc:100515348	40S ribosomal protein S24-like	35.6552615	0.311791754	6.837388401	0	up
LOC102163938	miscRNA			ssc:102163938	uncharacterized LOC102163938	62.88115411	0.555498639	6.822700509	0	up
LOC102163938	miscRNA			ssc:102163938	uncharacterized LOC102163938	62.88115411	0.555498639	6.822700509	0	up
LOC102163938	miscRNA			ssc:102163938	uncharacterized LOC102163938	62.88115411	0.555498639	6.822700509	0	up
LOC102158109	miscRNA			ssc:102158109	uncharacterized LOC102158109	29326.88858	114.7130555	7.998050613	0	up
LOC102158109	miscRNA			ssc:102158109	uncharacterized LOC102158109	29326.88858	114.7130555	7.998050613	0	up
LOC102158109	miscRNA			ssc:102158109	uncharacterized LOC102158109	29326.88858	114.7130555	7.998050613	0	up
LOC102160896	miscRNA			ssc:102160896	uncharacterized LOC102160896	552.8018871	0.637921794	9.759167257	0	up
LOC102160896	miscRNA			ssc:102160896	uncharacterized LOC102160896	552.8018871	0.637921794	9.759167257	0	up
LOC102160896	miscRNA			ssc:102160896	uncharacterized LOC102160896	552.8018871	0.637921794	9.759167257	0	up
LOC102166188	miscRNA			ssc:102166188	uncharacterized LOC102166188	212.7204528	0.329162492	9.335943089	0	up
LOC102166188	miscRNA			ssc:102166188	uncharacterized LOC102166188	212.7204528	0.329162492	9.335943089	0	up
LOC102166188	miscRNA			ssc:102166188	uncharacterized LOC102166188	212.7204528	0.329162492	9.335943089	0	up
LOC102166185	miscRNA			ssc:102166185	uncharacterized LOC102166185	35.70370614	3.743448443	3.253634048	1.72E-09	up
LOC102166185	miscRNA			ssc:102166185	uncharacterized LOC102166185	35.70370614	3.743448443	3.253634048	1.72E-09	up
LOC102166185	miscRNA			ssc:102166185	uncharacterized LOC102166185	35.70370614	3.743448443	3.253634048	1.72E-09	up
LOC102166181	miscRNA			ssc:102166181	uncharacterized LOC102166181	50.33399007	0.249072747	7.658821984	0	up
LOC102166181	miscRNA			ssc:102166181	uncharacterized LOC102166181	50.33399007	0.249072747	7.658821984	0	up
LOC102166181	miscRNA			ssc:102166181	uncharacterized LOC102166181	50.33399007	0.249072747	7.658821984	0	up
LOC102161728	miscRNA			ssc:102161728	uncharacterized LOC102161728	16.81029312	0.263411033	5.995885295	0.009645796	up
LOC102161728	miscRNA			ssc:102161728	uncharacterized LOC102161728	16.81029312	0.263411033	5.995885295	0.009645796	up
LOC102161728	miscRNA			ssc:102161728	uncharacterized LOC102161728	16.81029312	0.263411033	5.995885295	0.009645796	up
LOC102159000	miscRNA			ssc:102159000	uncharacterized LOC102159000	528.5795627	0.920082463	9.166141761	0	up
LOC102159000	miscRNA			ssc:102159000	uncharacterized LOC102159000	528.5795627	0.920082463	9.166141761	0	up
LOC102159000	miscRNA			ssc:102159000	uncharacterized LOC102159000	528.5795627	0.920082463	9.166141761	0	up
LOC102162652	miscRNA			ssc:102162652	uncharacterized LOC102162652	85.21413719	0.538402558	7.306263721	0	up
LOC102162652	miscRNA			ssc:102162652	uncharacterized LOC102162652	85.21413719	0.538402558	7.306263721	0	up
LOC102162652	miscRNA			ssc:102162652	uncharacterized LOC102162652	85.21413719	0.538402558	7.306263721	0	up
LOC102163505	miscRNA			ssc:102163505	uncharacterized LOC102163505	404.9488191	1.019876355	8.633201511	0	up
LOC102163505	miscRNA			ssc:102163505	uncharacterized LOC102163505	404.9488191	1.019876355	8.633201511	0	up
LOC102163505	miscRNA			ssc:102163505	uncharacterized LOC102163505	404.9488191	1.019876355	8.633201511	0	up
LOC102162650	miscRNA			ssc:102162650	uncharacterized LOC102162650	24.12543509	0.055549864	8.762555868	0	up
LOC102162650	miscRNA			ssc:102162650	uncharacterized LOC102162650	24.12543509	0.055549864	8.762555868	0	up
LOC102162650	miscRNA			ssc:102162650	uncharacterized LOC102162650	24.12543509	0.055549864	8.762555868	0	up
LOC102164820	miscRNA			ssc:102164820	uncharacterized LOC102164820	54.54867452	0.158101551	8.430548807	0	up
LOC102164820	miscRNA			ssc:102164820	uncharacterized LOC102164820	54.54867452	0.158101551	8.430548807	0	up
LOC102164820	miscRNA			ssc:102164820	uncharacterized LOC102164820	54.54867452	0.158101551	8.430548807	0	up
LOC102159472	miscRNA			ssc:102159472	uncharacterized LOC102159472	1154.242202	1.135112775	9.989894631	0	up
LOC102159472	miscRNA			ssc:102159472	uncharacterized LOC102159472	1154.242202	1.135112775	9.989894631	0	up
LOC102159472	miscRNA			ssc:102159472	uncharacterized LOC102159472	1154.242202	1.135112775	9.989894631	0	up
LOC102164819	miscRNA			ssc:102164819	uncharacterized LOC102164819	63.99538103	0.262032136	7.932080213	0	up
LOC102164819	miscRNA			ssc:102164819	uncharacterized LOC102164819	63.99538103	0.262032136	7.932080213	0	up
LOC102164819	miscRNA			ssc:102164819	uncharacterized LOC102164819	63.99538103	0.262032136	7.932080213	0	up
LOC102160456	miscRNA			ssc:102160456	uncharacterized LOC102160456	50.38243472	0.380301007	7.049635273	0	up
LOC102160456	miscRNA			ssc:102160456	uncharacterized LOC102160456	50.38243472	0.380301007	7.049635273	0	up
LOC102160456	miscRNA			ssc:102160456	uncharacterized LOC102160456	50.38243472	0.380301007	7.049635273	0	up
LOC102167086	miscRNA			ssc:102167086	uncharacterized LOC102167086	16.71340383	0.103930585	7.329241497	1.41E-06	up
LOC102167086	miscRNA			ssc:102167086	uncharacterized LOC102167086	16.71340383	0.103930585	7.329241497	1.41E-06	up
LOC102167086	miscRNA			ssc:102167086	uncharacterized LOC102167086	16.71340383	0.103930585	7.329241497	1.41E-06	up
LOC102167086	miscRNA			ssc:102167086	uncharacterized LOC102167086	16.71340383	0.103930585	7.329241497	1.41E-06	up
LOC102167075	miscRNA			ssc:102167075	uncharacterized LOC102167075	75.33142884	0.706431047	6.736559333	1.44E-15	up
LOC102167075	miscRNA			ssc:102167075	uncharacterized LOC102167075	75.33142884	0.706431047	6.736559333	1.44E-15	up
LOC102167075	miscRNA			ssc:102167075	uncharacterized LOC102167075	75.33142884	0.706431047	6.736559333	1.44E-15	up
LOC102159455	miscRNA			ssc:102159455	uncharacterized LOC102159455	67.33806179	0.096761442	9.442774219	0	up
LOC102159455	miscRNA			ssc:102159455	uncharacterized LOC102159455	67.33806179	0.096761442	9.442774219	0	up
LOC102159455	miscRNA			ssc:102159455	uncharacterized LOC102159455	67.33806179	0.096761442	9.442774219	0	up
LOC102167469	miscRNA			ssc:102167469	uncharacterized LOC102167469	83.80924238	0.276370422	8.244362317	0	up
LOC102167469	miscRNA			ssc:102167469	uncharacterized LOC102167469	83.80924238	0.276370422	8.244362317	0	up
LOC102167469	miscRNA			ssc:102167469	uncharacterized LOC102167469	83.80924238	0.276370422	8.244362317	0	up
LOC100516279	miscRNA	chr8:120250568-120251384	+	ssc:100516279	ribosomal protein S6 pseudogene	26.25699963	0.750675076	5.128369676	1.47E-06	up
LOC100516279	miscRNA	chr8:120250568-120251384	+	ssc:100516279	ribosomal protein S6 pseudogene	26.25699963	0.750675076	5.128369676	1.47E-06	up
LOC100516279	miscRNA	chr8:120250568-120251384	+	ssc:100516279	ribosomal protein S6 pseudogene	26.25699963	0.750675076	5.128369676	1.47E-06	up
LOC102160828	miscRNA			ssc:102160828	uncharacterized LOC102160828	17.7791861	0.311791754	5.833462698	2.58E-06	up
LOC102160828	miscRNA			ssc:102160828	uncharacterized LOC102160828	17.7791861	0.311791754	5.833462698	2.58E-06	up
LOC102160828	miscRNA			ssc:102160828	uncharacterized LOC102160828	17.7791861	0.311791754	5.833462698	2.58E-06	up
LOC102158502	miscRNA			ssc:102158502	uncharacterized LOC102158502	203.5159695	0.316203103	9.330074766	0	up
LOC102158502	miscRNA			ssc:102158502	uncharacterized LOC102158502	203.5159695	0.316203103	9.330074766	0	up
LOC102158502	miscRNA			ssc:102158502	uncharacterized LOC102158502	203.5159695	0.316203103	9.330074766	0	up
LOC100739038	miscRNA	chr6:308349-310492	-	ssc:100739038	tigger transposable element-derived protein 1-like	491.1318492	13.59645875	5.174807532	0	up
LOC100739038	miscRNA	chr6:308349-310492	-	ssc:100739038	tigger transposable element-derived protein 1-like	491.1318492	13.59645875	5.174807532	0	up
LOC100739038	miscRNA	chr6:308349-310492	-	ssc:100739038	tigger transposable element-derived protein 1-like	491.1318492	13.59645875	5.174807532	0	up
LOC102167443	miscRNA			ssc:102167443	uncharacterized LOC102167443	461.8712814	1.489919388	8.276112758	0	up
LOC102167443	miscRNA			ssc:102167443	uncharacterized LOC102167443	461.8712814	1.489919388	8.276112758	0	up
LOC102167443	miscRNA			ssc:102167443	uncharacterized LOC102167443	461.8712814	1.489919388	8.276112758	0	up
LOC102159828	miscRNA	chr18:20648241-20649963	-	ssc:102159828	40S ribosomal protein S20-like	22.09075984	0.850468969	4.699040636	0.001027616	up
LOC102159828	miscRNA	chr18:20648241-20649963	-	ssc:102159828	40S ribosomal protein S20-like	22.09075984	0.850468969	4.699040636	0.001027616	up
LOC102159829	miscRNA			ssc:102159829	uncharacterized LOC102159829	41.03261751	0.102551687	8.644276148	0	up
LOC102159829	miscRNA			ssc:102159829	uncharacterized LOC102159829	41.03261751	0.102551687	8.644276148	0	up
LOC102159829	miscRNA			ssc:102159829	uncharacterized LOC102159829	41.03261751	0.102551687	8.644276148	0	up
LOC102166589	miscRNA			ssc:102166589	uncharacterized LOC102166589	14.63028393	0.25624189	5.835307613	4.19E-05	up
LOC102166589	miscRNA			ssc:102166589	uncharacterized LOC102166589	14.63028393	0.25624189	5.835307613	4.19E-05	up
LOC102166589	miscRNA			ssc:102166589	uncharacterized LOC102166589	14.63028393	0.25624189	5.835307613	4.19E-05	up
LOC102166585	miscRNA			ssc:102166585	uncharacterized LOC102166585	19.862306	0.145142162	7.09642265	1.23E-07	up
LOC102166585	miscRNA			ssc:102166585	uncharacterized LOC102166585	19.862306	0.145142162	7.09642265	1.23E-07	up
LOC102166585	miscRNA			ssc:102166585	uncharacterized LOC102166585	19.862306	0.145142162	7.09642265	1.23E-07	up
LOC102167025	miscRNA			ssc:102167025	uncharacterized LOC102167025	20.97653292	1.523812095	3.783019327	8.44E-07	up
LOC102167025	miscRNA			ssc:102167025	uncharacterized LOC102167025	20.97653292	1.523812095	3.783019327	8.44E-07	up
LOC102167025	miscRNA			ssc:102167025	uncharacterized LOC102167025	20.97653292	1.523812095	3.783019327	8.44E-07	up
LOC100624022	miscRNA	chr1:310219969-310226816	-	ssc:100624022	uncharacterized LOC100624022	92.38394521	0.263411033	8.454182571	0	up
LOC100624022	miscRNA	chr1:310219969-310226816	-	ssc:100624022	uncharacterized LOC100624022	92.38394521	0.263411033	8.454182571	0	up
LOC102167020	miscRNA			ssc:102167020	uncharacterized LOC102167020	603.2812112	2.0452683	8.204396732	0	up
LOC102167020	miscRNA			ssc:102167020	uncharacterized LOC102167020	603.2812112	2.0452683	8.204396732	0	up
LOC102167020	miscRNA			ssc:102167020	uncharacterized LOC102167020	603.2812112	2.0452683	8.204396732	0	up
LOC102159884	miscRNA			ssc:102159884	uncharacterized LOC102159884	189.9999125	1.475431374	7.008718125	0	up
LOC102159884	miscRNA			ssc:102159884	uncharacterized LOC102159884	189.9999125	1.475431374	7.008718125	0	up
LOC102159884	miscRNA			ssc:102159884	uncharacterized LOC102159884	189.9999125	1.475431374	7.008718125	0	up
LOC102157690	miscRNA			ssc:102157690	uncharacterized LOC102157690	154.2477617	0.70505215	7.773303867	0	up
LOC102157690	miscRNA			ssc:102157690	uncharacterized LOC102157690	154.2477617	0.70505215	7.773303867	0	up
LOC102157690	miscRNA			ssc:102157690	uncharacterized LOC102157690	154.2477617	0.70505215	7.773303867	0	up
LOC102161711	miscRNA			ssc:102161711	uncharacterized LOC102161711	259.6148728	0.888797823	8.190302037	0	up
LOC102161711	miscRNA			ssc:102161711	uncharacterized LOC102161711	259.6148728	0.888797823	8.190302037	0	up
LOC102161711	miscRNA			ssc:102161711	uncharacterized LOC102161711	259.6148728	0.888797823	8.190302037	0	up
LOC102167015	miscRNA			ssc:102167015	uncharacterized LOC102167015	197.2181652	0.588162176	8.389362715	0	up
LOC102167015	miscRNA			ssc:102167015	uncharacterized LOC102167015	197.2181652	0.588162176	8.389362715	0	up
LOC102167015	miscRNA			ssc:102167015	uncharacterized LOC102167015	197.2181652	0.588162176	8.389362715	0	up
LOC102158541	miscRNA			ssc:102158541	uncharacterized LOC102158541	27.22589261	0	20	2.30E-13	up
LOC102158541	miscRNA			ssc:102158541	uncharacterized LOC102158541	27.22589261	0	20	2.30E-13	up
LOC102158541	miscRNA			ssc:102158541	uncharacterized LOC102158541	27.22589261	0	20	2.30E-13	up
LOC100625333	miscRNA			ssc:100625333	high mobility group protein B2-like	237.1365557	743.4116645	-1.648443247	0.045827561	down
LOC100625333	miscRNA			ssc:100625333	high mobility group protein B2-like	237.1365557	743.4116645	-1.648443247	0.045827561	down
LOC100625333	miscRNA			ssc:100625333	high mobility group protein B2-like	237.1365557	743.4116645	-1.648443247	0.045827561	down
LOC100625333	miscRNA			ssc:100625333	high mobility group protein B2-like	237.1365557	743.4116645	-1.648443247	0.045827561	down
LOC100739002	miscRNA			ssc:100739002	uncharacterized LOC100739002	50.33399007	14.00886837	1.845192547	0.014437621	up
LOC100739002	miscRNA			ssc:100739002	uncharacterized LOC100739002	50.33399007	14.00886837	1.845192547	0.014437621	up
LOC100739002	miscRNA			ssc:100739002	uncharacterized LOC100739002	50.33399007	14.00886837	1.845192547	0.014437621	up
LOC100739002	miscRNA			ssc:100739002	uncharacterized LOC100739002	50.33399007	14.00886837	1.845192547	0.014437621	up
LOC102167477	miscRNA			ssc:102167477	uncharacterized LOC102167477	84.29368886	28.55854149	1.561502318	5.40E-05	up
LOC102167477	miscRNA			ssc:102167477	uncharacterized LOC102167477	84.29368886	28.55854149	1.561502318	5.40E-05	up
LOC102167477	miscRNA			ssc:102167477	uncharacterized LOC102167477	84.29368886	28.55854149	1.561502318	5.40E-05	up
LOC100520332	miscRNA			ssc:100520332	uncharacterized LOC100520332	35.60681685	0.111099728	8.324154376	3.33E-16	up
LOC100520332	miscRNA			ssc:100520332	uncharacterized LOC100520332	35.60681685	0.111099728	8.324154376	3.33E-16	up
LOC100520332	miscRNA			ssc:100520332	uncharacterized LOC100520332	35.60681685	0.111099728	8.324154376	3.33E-16	up
LOC102160838	miscRNA			ssc:102160838	uncharacterized LOC102160838	13.6129463	0	20	0.04110534	up
LOC102160838	miscRNA			ssc:102160838	uncharacterized LOC102160838	13.6129463	0	20	0.04110534	up
LOC102160838	miscRNA			ssc:102160838	uncharacterized LOC102160838	13.6129463	0	20	0.04110534	up
LOC102167748	miscRNA			ssc:102167748	uncharacterized LOC102167748	29.45434645	0.263411033	6.805020956	2.01E-14	up
LOC102167748	miscRNA			ssc:102167748	uncharacterized LOC102167748	29.45434645	0.263411033	6.805020956	2.01E-14	up
LOC102167748	miscRNA			ssc:102167748	uncharacterized LOC102167748	29.45434645	0.263411033	6.805020956	2.01E-14	up
LOC102167748	miscRNA			ssc:102167748	uncharacterized LOC102167748	29.45434645	0.263411033	6.805020956	2.01E-14	up
LOC102166892	miscRNA			ssc:102166892	uncharacterized LOC102166892	227.302292	0.374510761	9.245389343	0	up
LOC102166892	miscRNA			ssc:102166892	uncharacterized LOC102166892	227.302292	0.374510761	9.245389343	0	up
LOC102166892	miscRNA			ssc:102166892	uncharacterized LOC102166892	227.302292	0.374510761	9.245389343	0	up
LOC102164228	miscRNA			ssc:102164228	uncharacterized LOC102164228	9.398261862	0.35741468	4.716723169	0.006447277	up
LOC102164228	miscRNA			ssc:102164228	uncharacterized LOC102164228	9.398261862	0.35741468	4.716723169	0.006447277	up
LOC102164228	miscRNA			ssc:102164228	uncharacterized LOC102164228	9.398261862	0.35741468	4.716723169	0.006447277	up
LOC102162042	miscRNA			ssc:102162042	uncharacterized LOC102162042	177.4527485	9.425452007	4.234729303	0	up
LOC102162042	miscRNA			ssc:102162042	uncharacterized LOC102162042	177.4527485	9.425452007	4.234729303	0	up
LOC102162042	miscRNA			ssc:102162042	uncharacterized LOC102162042	177.4527485	9.425452007	4.234729303	0	up
LOC102166884	miscRNA			ssc:102166884	uncharacterized LOC102166884	29.4059018	0.25624189	6.84245558	4.46E-13	up
LOC102166884	miscRNA			ssc:102166884	uncharacterized LOC102166884	29.4059018	0.25624189	6.84245558	4.46E-13	up
LOC102166884	miscRNA			ssc:102166884	uncharacterized LOC102166884	29.4059018	0.25624189	6.84245558	4.46E-13	up
LOC102162045	miscRNA			ssc:102162045	uncharacterized LOC102162045	29.35745716	0.055549864	9.045727919	0	up
LOC102162045	miscRNA			ssc:102162045	uncharacterized LOC102162045	29.35745716	0.055549864	9.045727919	0	up
LOC102162045	miscRNA			ssc:102162045	uncharacterized LOC102162045	29.35745716	0.055549864	9.045727919	0	up
LOC102164215	miscRNA			ssc:102164215	uncharacterized LOC102164215	209.4746613	1.143935472	7.516626257	0	up
LOC102164215	miscRNA			ssc:102164215	uncharacterized LOC102164215	209.4746613	1.143935472	7.516626257	0	up
LOC102164215	miscRNA			ssc:102164215	uncharacterized LOC102164215	209.4746613	1.143935472	7.516626257	0	up
LOC102165544	miscRNA			ssc:102165544	uncharacterized LOC102165544	7.363586613	46.13979034	-2.647530906	0.013071185	down
LOC102165544	miscRNA			ssc:102165544	uncharacterized LOC102165544	7.363586613	46.13979034	-2.647530906	0.013071185	down
LOC102165544	miscRNA			ssc:102165544	uncharacterized LOC102165544	7.363586613	46.13979034	-2.647530906	0.013071185	down
LOC102165544	miscRNA			ssc:102165544	uncharacterized LOC102165544	7.363586613	46.13979034	-2.647530906	0.013071185	down
LOC100626862	miscRNA			ssc:100626862	uncharacterized LOC100626862	125.0840831	0.32613004	8.583235168	0	up
LOC100626862	miscRNA			ssc:100626862	uncharacterized LOC100626862	125.0840831	0.32613004	8.583235168	0	up
LOC100626862	miscRNA			ssc:100626862	uncharacterized LOC100626862	125.0840831	0.32613004	8.583235168	0	up
LOC102164202	miscRNA			ssc:102164202	uncharacterized LOC102164202	34.58947922	0.263411033	7.036873707	2.22E-16	up
LOC102164202	miscRNA			ssc:102164202	uncharacterized LOC102164202	34.58947922	0.263411033	7.036873707	2.22E-16	up
LOC102164202	miscRNA			ssc:102164202	uncharacterized LOC102164202	34.58947922	0.263411033	7.036873707	2.22E-16	up
LOC102157915	miscRNA			ssc:102157915	uncharacterized LOC102157915	707.2918721	0.111099728	12.63623468	0	up
LOC102157915	miscRNA			ssc:102157915	uncharacterized LOC102157915	707.2918721	0.111099728	12.63623468	0	up
LOC102157915	miscRNA			ssc:102157915	uncharacterized LOC102157915	707.2918721	0.111099728	12.63623468	0	up
LOC100152387	miscRNA			ssc:100152387	uncharacterized LOC100152387	51.54510629	0.310412857	7.375503342	0	up
LOC100152387	miscRNA			ssc:100152387	uncharacterized LOC100152387	51.54510629	0.310412857	7.375503342	0	up
LOC100152387	miscRNA			ssc:100152387	uncharacterized LOC100152387	51.54510629	0.310412857	7.375503342	0	up
LOC102165125	miscRNA			ssc:102165125	uncharacterized LOC102165125	203.6128588	0.109720831	10.85777551	0	up
LOC102165125	miscRNA			ssc:102165125	uncharacterized LOC102165125	203.6128588	0.109720831	10.85777551	0	up
LOC102165125	miscRNA			ssc:102165125	uncharacterized LOC102165125	203.6128588	0.109720831	10.85777551	0	up
LOC100624669	miscRNA			ssc:100624669	uncharacterized LOC100624669	14.82406252	2.290204355	2.694392631	2.47E-04	up
LOC100624669	miscRNA			ssc:100624669	uncharacterized LOC100624669	14.82406252	2.290204355	2.694392631	2.47E-04	up
LOC100624669	miscRNA			ssc:100624669	uncharacterized LOC100624669	14.82406252	2.290204355	2.694392631	2.47E-04	up
LOC100624669	miscRNA			ssc:100624669	uncharacterized LOC100624669	14.82406252	2.290204355	2.694392631	2.47E-04	up
LOC102162092	miscRNA			ssc:102162092	uncharacterized LOC102162092	131.5272214	3.13280514	5.391762569	0	up
LOC102162092	miscRNA			ssc:102162092	uncharacterized LOC102162092	131.5272214	3.13280514	5.391762569	0	up
LOC102162092	miscRNA			ssc:102162092	uncharacterized LOC102162092	131.5272214	3.13280514	5.391762569	0	up
LOC102158831	miscRNA			ssc:102158831	uncharacterized LOC102158831	12.54716403	0.048380721	8.018713339	1.24E-06	up
LOC102158831	miscRNA			ssc:102158831	uncharacterized LOC102158831	12.54716403	0.048380721	8.018713339	1.24E-06	up
LOC102158831	miscRNA			ssc:102158831	uncharacterized LOC102158831	12.54716403	0.048380721	8.018713339	1.24E-06	up
LOC102158831	miscRNA			ssc:102158831	uncharacterized LOC102158831	12.54716403	0.048380721	8.018713339	1.24E-06	up
LOC102165113	miscRNA			ssc:102165113	uncharacterized LOC102165113	16.76184848	0.310412857	5.754849134	5.24E-08	up
LOC102165113	miscRNA			ssc:102165113	uncharacterized LOC102165113	16.76184848	0.310412857	5.754849134	5.24E-08	up
LOC102165113	miscRNA			ssc:102165113	uncharacterized LOC102165113	16.76184848	0.310412857	5.754849134	5.24E-08	up
LOC102165102	miscRNA			ssc:102165102	uncharacterized LOC102165102	565.0099386	3.297121321	7.420925461	0	up
LOC102165102	miscRNA			ssc:102165102	uncharacterized LOC102165102	565.0099386	3.297121321	7.420925461	0	up
LOC102165102	miscRNA			ssc:102165102	uncharacterized LOC102165102	565.0099386	3.297121321	7.420925461	0	up
LOC102165577	miscRNA			ssc:102165577	uncharacterized LOC102165577	35.6552615	0.048380721	9.525467007	0	up
LOC102165577	miscRNA			ssc:102165577	uncharacterized LOC102165577	35.6552615	0.048380721	9.525467007	0	up
LOC102165577	miscRNA			ssc:102165577	uncharacterized LOC102165577	35.6552615	0.048380721	9.525467007	0	up
LOC102166429	miscRNA			ssc:102166429	uncharacterized LOC102166429	488.3220596	1.525615376	8.322297852	0	up
LOC102166429	miscRNA			ssc:102166429	uncharacterized LOC102166429	488.3220596	1.525615376	8.322297852	0	up
LOC102166429	miscRNA			ssc:102166429	uncharacterized LOC102166429	488.3220596	1.525615376	8.322297852	0	up
LOC100737553	miscRNA	chr1:227347002-227347786	+	ssc:100737553	peptidyl-prolyl cis-trans isomerase A-like	102.6057661	263.6091762	-1.361288783	0.013865007	down
LOC100737553	miscRNA	chr1:227347002-227347786	+	ssc:100737553	peptidyl-prolyl cis-trans isomerase A-like	102.6057661	263.6091762	-1.361288783	0.013865007	down
LOC102165961	miscRNA			ssc:102165961	uncharacterized LOC102165961	69.17895845	0.478441346	7.175847413	0	up
LOC102165961	miscRNA			ssc:102165961	uncharacterized LOC102165961	69.17895845	0.478441346	7.175847413	0	up
LOC102165961	miscRNA			ssc:102165961	uncharacterized LOC102165961	69.17895845	0.478441346	7.175847413	0	up
LOC102160274	miscRNA			ssc:102160274	uncharacterized LOC102160274	190.0968018	4.719610898	5.331922526	0	up
LOC102160274	miscRNA			ssc:102160274	uncharacterized LOC102160274	190.0968018	4.719610898	5.331922526	0	up
LOC102160274	miscRNA			ssc:102160274	uncharacterized LOC102160274	190.0968018	4.719610898	5.331922526	0	up
LOC102166808	miscRNA			ssc:102166808	uncharacterized LOC102166808	13.6129463	0.055549864	7.936980256	1.64E-08	up
LOC102166808	miscRNA			ssc:102166808	uncharacterized LOC102166808	13.6129463	0.055549864	7.936980256	1.64E-08	up
LOC102166808	miscRNA			ssc:102166808	uncharacterized LOC102166808	13.6129463	0.055549864	7.936980256	1.64E-08	up
LOC102164629	miscRNA			ssc:102164629	uncharacterized LOC102164629	17.8760754	0.310412857	5.847697912	0.001529257	up
LOC102164629	miscRNA			ssc:102164629	uncharacterized LOC102164629	17.8760754	0.310412857	5.847697912	0.001529257	up
LOC102164629	miscRNA			ssc:102164629	uncharacterized LOC102164629	17.8760754	0.310412857	5.847697912	0.001529257	up
LOC102165953	miscRNA			ssc:102165953	uncharacterized LOC102165953	90.25238066	0.222199456	8.665965895	0	up
LOC102165953	miscRNA			ssc:102165953	uncharacterized LOC102165953	90.25238066	0.222199456	8.665965895	0	up
LOC102165953	miscRNA			ssc:102165953	uncharacterized LOC102165953	90.25238066	0.222199456	8.665965895	0	up
LOC102160269	miscRNA			ssc:102160269	uncharacterized LOC102160269	48.49309342	0.434471974	6.802372361	0	up
LOC102160269	miscRNA			ssc:102160269	uncharacterized LOC102160269	48.49309342	0.434471974	6.802372361	0	up
LOC102160269	miscRNA			ssc:102160269	uncharacterized LOC102160269	48.49309342	0.434471974	6.802372361	0	up
LOC102161117	miscRNA			ssc:102161117	uncharacterized LOC102161117	430.8182615	2.142304398	7.651772108	0	up
LOC102161117	miscRNA			ssc:102161117	uncharacterized LOC102161117	430.8182615	2.142304398	7.651772108	0	up
LOC102161117	miscRNA			ssc:102161117	uncharacterized LOC102161117	430.8182615	2.142304398	7.651772108	0	up
LOC102161594	miscRNA			ssc:102161594	uncharacterized LOC102161594	77.75366128	27.03133432	1.524277883	1.65E-05	up
LOC102161594	miscRNA			ssc:102161594	uncharacterized LOC102161594	77.75366128	27.03133432	1.524277883	1.65E-05	up
LOC102161594	miscRNA			ssc:102161594	uncharacterized LOC102161594	77.75366128	27.03133432	1.524277883	1.65E-05	up
LOC102161594	miscRNA			ssc:102161594	uncharacterized LOC102161594	77.75366128	27.03133432	1.524277883	1.65E-05	up
LOC102164617	miscRNA			ssc:102164617	uncharacterized LOC102164617	89.23504304	0.263411033	8.404150789	0	up
LOC102164617	miscRNA			ssc:102164617	uncharacterized LOC102164617	89.23504304	0.263411033	8.404150789	0	up
LOC102164617	miscRNA			ssc:102164617	uncharacterized LOC102164617	89.23504304	0.263411033	8.404150789	0	up
LOC102164615	miscRNA			ssc:102164615	uncharacterized LOC102164615	108.3222347	0.871701742	6.957279099	0	up
LOC102164615	miscRNA			ssc:102164615	uncharacterized LOC102164615	108.3222347	0.871701742	6.957279099	0	up
LOC102164615	miscRNA			ssc:102164615	uncharacterized LOC102164615	108.3222347	0.871701742	6.957279099	0	up
LOC102161589	miscRNA			ssc:102161589	uncharacterized LOC102161589	108.9520151	3.751147715	4.860216994	5.77E-13	up
LOC102161589	miscRNA			ssc:102161589	uncharacterized LOC102161589	108.9520151	3.751147715	4.860216994	5.77E-13	up
LOC102161589	miscRNA			ssc:102161589	uncharacterized LOC102161589	108.9520151	3.751147715	4.860216994	5.77E-13	up
LOC102162427	miscRNA			ssc:102162427	uncharacterized LOC102162427	12.54716403	1.190512911	3.397706144	0.016927075	up
LOC102162427	miscRNA			ssc:102162427	uncharacterized LOC102162427	12.54716403	1.190512911	3.397706144	0.016927075	up
LOC102162427	miscRNA			ssc:102162427	uncharacterized LOC102162427	12.54716403	1.190512911	3.397706144	0.016927075	up
LOC102162427	miscRNA			ssc:102162427	uncharacterized LOC102162427	12.54716403	1.190512911	3.397706144	0.016927075	up
LOC102161169	miscRNA			ssc:102161169	uncharacterized LOC102161169	335.3338588	0.531233415	9.302036548	0	up
LOC102161169	miscRNA			ssc:102161169	uncharacterized LOC102161169	335.3338588	0.531233415	9.302036548	0	up
LOC102161169	miscRNA			ssc:102161169	uncharacterized LOC102161169	335.3338588	0.531233415	9.302036548	0	up
LOC102161160	miscRNA			ssc:102161160	uncharacterized LOC102161160	17.8760754	0.317582	5.81475708	0.001530118	up
LOC102161160	miscRNA			ssc:102161160	uncharacterized LOC102161160	17.8760754	0.317582	5.81475708	0.001530118	up
LOC102161160	miscRNA			ssc:102161160	uncharacterized LOC102161160	17.8760754	0.317582	5.81475708	0.001530118	up
LOC102162001	miscRNA			ssc:102162001	uncharacterized LOC102162001	118.5440555	0.995760859	6.895408297	0	up
LOC102162001	miscRNA			ssc:102162001	uncharacterized LOC102162001	118.5440555	0.995760859	6.895408297	0	up
LOC102162001	miscRNA			ssc:102162001	uncharacterized LOC102162001	118.5440555	0.995760859	6.895408297	0	up
LOC102161144	miscRNA			ssc:102161144	uncharacterized LOC102161144	7.315141965	0.152311305	5.585790927	0.002090752	up
LOC102161144	miscRNA			ssc:102161144	uncharacterized LOC102161144	7.315141965	0.152311305	5.585790927	0.002090752	up
LOC102161144	miscRNA			ssc:102161144	uncharacterized LOC102161144	7.315141965	0.152311305	5.585790927	0.002090752	up
LOC102165984	miscRNA			ssc:102165984	uncharacterized LOC102165984	22.04231519	0.220820558	6.64125746	6.11E-15	up
LOC102165984	miscRNA			ssc:102165984	uncharacterized LOC102165984	22.04231519	0.220820558	6.64125746	6.11E-15	up
LOC102165984	miscRNA			ssc:102165984	uncharacterized LOC102165984	22.04231519	0.220820558	6.64125746	6.11E-15	up
LOC102166832	miscRNA			ssc:102166832	uncharacterized LOC102166832	96.50174035	0.27774932	8.440627773	0	up
LOC102166832	miscRNA			ssc:102166832	uncharacterized LOC102166832	96.50174035	0.27774932	8.440627773	0	up
LOC102166832	miscRNA			ssc:102166832	uncharacterized LOC102166832	96.50174035	0.27774932	8.440627773	0	up
LOC102162479	miscRNA			ssc:102162479	uncharacterized LOC102162479	74.50786981	0.371752966	7.646904752	0	up
LOC102162479	miscRNA			ssc:102162479	uncharacterized LOC102162479	74.50786981	0.371752966	7.646904752	0	up
LOC102162479	miscRNA			ssc:102162479	uncharacterized LOC102162479	74.50786981	0.371752966	7.646904752	0	up
LOC102165505	miscRNA			ssc:102165505	uncharacterized LOC102165505	31.44057705	1.076380732	4.86836732	1.73E-09	up
LOC102165505	miscRNA			ssc:102165505	uncharacterized LOC102165505	31.44057705	1.076380732	4.86836732	1.73E-09	up
LOC102165505	miscRNA			ssc:102165505	uncharacterized LOC102165505	31.44057705	1.076380732	4.86836732	1.73E-09	up
LOC102166835	miscRNA			ssc:102166835	uncharacterized LOC102166835	25.14277271	5.814336065	2.112457391	0.032903004	up
LOC102166835	miscRNA			ssc:102166835	uncharacterized LOC102166835	25.14277271	5.814336065	2.112457391	0.032903004	up
LOC102166835	miscRNA			ssc:102166835	uncharacterized LOC102166835	25.14277271	5.814336065	2.112457391	0.032903004	up
LOC102166835	miscRNA			ssc:102166835	uncharacterized LOC102166835	25.14277271	5.814336065	2.112457391	0.032903004	up
LOC100737981	miscRNA			ssc:100737981	uncharacterized LOC100737981	390.9967602	996.9513589	-1.350366464	1.80E-05	down
LOC100737981	miscRNA			ssc:100737981	uncharacterized LOC100737981	390.9967602	996.9513589	-1.350366464	1.80E-05	down
LOC100737981	miscRNA			ssc:100737981	uncharacterized LOC100737981	390.9967602	996.9513589	-1.350366464	1.80E-05	down
LOC102160282	miscRNA			ssc:102160282	uncharacterized LOC102160282	26.16011034	0.303243714	6.430747078	2.66E-09	up
LOC102160282	miscRNA			ssc:102160282	uncharacterized LOC102160282	26.16011034	0.303243714	6.430747078	2.66E-09	up
LOC102160282	miscRNA			ssc:102160282	uncharacterized LOC102160282	26.16011034	0.303243714	6.430747078	2.66E-09	up
LOC102162975	miscRNA			ssc:102162975	uncharacterized LOC102162975	68.25851012	0.765013362	6.479380167	0	up
LOC102162975	miscRNA			ssc:102162975	uncharacterized LOC102162975	68.25851012	0.765013362	6.479380167	0	up
LOC102162975	miscRNA			ssc:102162975	uncharacterized LOC102162975	68.25851012	0.765013362	6.479380167	0	up
LOC102160790	miscRNA			ssc:102160790	uncharacterized LOC102160790	93.30439353	0.491400735	7.568901191	0	up
LOC102160790	miscRNA			ssc:102160790	uncharacterized LOC102160790	93.30439353	0.491400735	7.568901191	0	up
LOC102160790	miscRNA			ssc:102160790	uncharacterized LOC102160790	93.30439353	0.491400735	7.568901191	0	up
LOC102158478	miscRNA			ssc:102158478	uncharacterized LOC102158478	133.2712288	0.443020014	8.232777767	0	up
LOC102158478	miscRNA			ssc:102158478	uncharacterized LOC102158478	133.2712288	0.443020014	8.232777767	0	up
LOC102158478	miscRNA			ssc:102158478	uncharacterized LOC102158478	133.2712288	0.443020014	8.232777767	0	up
LOC102158474	miscRNA			ssc:102158474	uncharacterized LOC102158474	15.6960662	0.535644764	4.87298269	2.93E-05	up
LOC102158474	miscRNA			ssc:102158474	uncharacterized LOC102158474	15.6960662	0.535644764	4.87298269	2.93E-05	up
LOC102158474	miscRNA			ssc:102158474	uncharacterized LOC102158474	15.6960662	0.535644764	4.87298269	2.93E-05	up
LOC102159790	miscRNA			ssc:102159790	uncharacterized LOC102159790	116.6062696	22.63178856	2.365222852	3.77E-11	up
LOC102159790	miscRNA			ssc:102159790	uncharacterized LOC102159790	116.6062696	22.63178856	2.365222852	3.77E-11	up
LOC102159790	miscRNA			ssc:102159790	uncharacterized LOC102159790	116.6062696	22.63178856	2.365222852	3.77E-11	up
LOC102159782	miscRNA			ssc:102159782	uncharacterized LOC102159782	32.55480397	3.810004687	3.095005774	6.87E-09	up
LOC102159782	miscRNA			ssc:102159782	uncharacterized LOC102159782	32.55480397	3.810004687	3.095005774	6.87E-09	up
LOC102159782	miscRNA			ssc:102159782	uncharacterized LOC102159782	32.55480397	3.810004687	3.095005774	6.87E-09	up
LOC102161622	miscRNA			ssc:102161622	uncharacterized LOC102161622	285.3389813	0.826078816	8.432181702	0	up
LOC102161622	miscRNA			ssc:102161622	uncharacterized LOC102161622	285.3389813	0.826078816	8.432181702	0	up
LOC102161622	miscRNA			ssc:102161622	uncharacterized LOC102161622	285.3389813	0.826078816	8.432181702	0	up
LOC102162955	miscRNA			ssc:102162955	uncharacterized LOC102162955	25.14277271	0	20	5.95E-12	up
LOC102162955	miscRNA			ssc:102162955	uncharacterized LOC102162955	25.14277271	0	20	5.95E-12	up
LOC102162955	miscRNA			ssc:102162955	uncharacterized LOC102162955	25.14277271	0	20	5.95E-12	up
LOC102166078	miscRNA			ssc:102166078	uncharacterized LOC102166078	122.6618507	0	20	0	up
LOC102166078	miscRNA			ssc:102166078	uncharacterized LOC102166078	122.6618507	0	20	0	up
LOC102166078	miscRNA			ssc:102166078	uncharacterized LOC102166078	122.6618507	0	20	0	up
LOC102159308	miscRNA			ssc:102159308	uncharacterized LOC102159308	52.56244392	0.469893305	6.805555332	0	up
LOC102159308	miscRNA			ssc:102159308	uncharacterized LOC102159308	52.56244392	0.469893305	6.805555332	0	up
LOC102159308	miscRNA			ssc:102159308	uncharacterized LOC102159308	52.56244392	0.469893305	6.805555332	0	up
LOC102159788	miscRNA			ssc:102159788	uncharacterized LOC102159788	78.8678882	1.249095227	5.980482641	0	up
LOC102159788	miscRNA			ssc:102159788	uncharacterized LOC102159788	78.8678882	1.249095227	5.980482641	0	up
LOC102159788	miscRNA			ssc:102159788	uncharacterized LOC102159788	78.8678882	1.249095227	5.980482641	0	up
LOC102161610	miscRNA			ssc:102161610	uncharacterized LOC102161610	23.15654211	0.109720831	7.721438579	2.98E-11	up
LOC102161610	miscRNA			ssc:102161610	uncharacterized LOC102161610	23.15654211	0.109720831	7.721438579	2.98E-11	up
LOC102161610	miscRNA			ssc:102161610	uncharacterized LOC102161610	23.15654211	0.109720831	7.721438579	2.98E-11	up
LOC102166068	miscRNA			ssc:102166068	uncharacterized LOC102166068	25.09432806	0.380301007	6.044075747	1.43E-07	up
LOC102166068	miscRNA			ssc:102166068	uncharacterized LOC102166068	25.09432806	0.380301007	6.044075747	1.43E-07	up
LOC102166068	miscRNA			ssc:102166068	uncharacterized LOC102166068	25.09432806	0.380301007	6.044075747	1.43E-07	up
LOC102161605	miscRNA			ssc:102161605	uncharacterized LOC102161605	28.34011953	0	20	3.33E-16	up
LOC102161605	miscRNA			ssc:102161605	uncharacterized LOC102161605	28.34011953	0	20	3.33E-16	up
LOC102161605	miscRNA			ssc:102161605	uncharacterized LOC102161605	28.34011953	0	20	3.33E-16	up
LOC102158442	miscRNA			ssc:102158442	uncharacterized LOC102158442	65.10960795	0.212272518	8.260809038	0	up
LOC102158442	miscRNA			ssc:102158442	uncharacterized LOC102158442	65.10960795	0.212272518	8.260809038	0	up
LOC102158442	miscRNA			ssc:102158442	uncharacterized LOC102158442	65.10960795	0.212272518	8.260809038	0	up
LOC102158033	miscRNA			ssc:102158033	uncharacterized LOC102158033	42.00151049	0.270580176	7.278241255	0	up
LOC102158033	miscRNA			ssc:102158033	uncharacterized LOC102158033	42.00151049	0.270580176	7.278241255	0	up
LOC102158033	miscRNA			ssc:102158033	uncharacterized LOC102158033	42.00151049	0.270580176	7.278241255	0	up
LOC102161204	miscRNA			ssc:102161204	uncharacterized LOC102161204	179.4389791	0.421512585	8.733701897	0	up
LOC102161204	miscRNA			ssc:102161204	uncharacterized LOC102161204	179.4389791	0.421512585	8.733701897	0	up
LOC102161204	miscRNA			ssc:102161204	uncharacterized LOC102161204	179.4389791	0.421512585	8.733701897	0	up
LOC100520863	miscRNA			ssc:100520863	uncharacterized LOC100520863	81.09634204	0.584025484	7.117461708	0	up
LOC100520863	miscRNA			ssc:100520863	uncharacterized LOC100520863	81.09634204	0.584025484	7.117461708	0	up
LOC100520863	miscRNA			ssc:100520863	uncharacterized LOC100520863	81.09634204	0.584025484	7.117461708	0	up
LOC100520863	miscRNA			ssc:100520863	uncharacterized LOC100520863	81.09634204	0.584025484	7.117461708	0	up
LOC102164700	miscRNA			ssc:102164700	uncharacterized LOC102164700	24.12543509	0.206482272	6.868393229	9.33E-15	up
LOC102164700	miscRNA			ssc:102164700	uncharacterized LOC102164700	24.12543509	0.206482272	6.868393229	9.33E-15	up
LOC102164700	miscRNA			ssc:102164700	uncharacterized LOC102164700	24.12543509	0.206482272	6.868393229	9.33E-15	up
LOC102162521	miscRNA			ssc:102162521	uncharacterized LOC102162521	48.20242553	0.111099728	8.761106651	0	up
LOC102162521	miscRNA			ssc:102162521	uncharacterized LOC102162521	48.20242553	0.111099728	8.761106651	0	up
LOC102162521	miscRNA			ssc:102162521	uncharacterized LOC102162521	48.20242553	0.111099728	8.761106651	0	up
LOC102162525	miscRNA			ssc:102162525	uncharacterized LOC102162525	64.04382568	0.812015186	6.301408972	0	up
LOC102162525	miscRNA			ssc:102162525	uncharacterized LOC102162525	64.04382568	0.812015186	6.301408972	0	up
LOC102162525	miscRNA			ssc:102162525	uncharacterized LOC102162525	64.04382568	0.812015186	6.301408972	0	up
LOC102162511	miscRNA			ssc:102162511	uncharacterized LOC102162511	52.41710997	0.103930585	8.978273729	0	up
LOC102162511	miscRNA			ssc:102162511	uncharacterized LOC102162511	52.41710997	0.103930585	8.978273729	0	up
LOC102162511	miscRNA			ssc:102162511	uncharacterized LOC102162511	52.41710997	0.103930585	8.978273729	0	up
LOC102158010	miscRNA			ssc:102158010	uncharacterized LOC102158010	136.0810184	0.554119742	7.94005236	0	up
LOC102158010	miscRNA			ssc:102158010	uncharacterized LOC102158010	136.0810184	0.554119742	7.94005236	0	up
LOC102158010	miscRNA			ssc:102158010	uncharacterized LOC102158010	136.0810184	0.554119742	7.94005236	0	up
LOC102158007	miscRNA			ssc:102158007	uncharacterized LOC102158007	450.8259015	0.820563226	9.101740189	0	up
LOC102158007	miscRNA			ssc:102158007	uncharacterized LOC102158007	450.8259015	0.820563226	9.101740189	0	up
LOC102158007	miscRNA			ssc:102158007	uncharacterized LOC102158007	450.8259015	0.820563226	9.101740189	0	up
LOC102166015	miscRNA			ssc:102166015	uncharacterized LOC102166015	7.460475911	0.055549864	7.069340476	4.09E-05	up
LOC102166015	miscRNA			ssc:102166015	uncharacterized LOC102166015	7.460475911	0.055549864	7.069340476	4.09E-05	up
LOC102166015	miscRNA			ssc:102166015	uncharacterized LOC102166015	7.460475911	0.055549864	7.069340476	4.09E-05	up
LOC102166498	miscRNA			ssc:102166498	uncharacterized LOC102166498	476.7922332	1.8674626	7.996137574	0	up
LOC102166498	miscRNA			ssc:102166498	uncharacterized LOC102166498	476.7922332	1.8674626	7.996137574	0	up
LOC102166498	miscRNA			ssc:102166498	uncharacterized LOC102166498	476.7922332	1.8674626	7.996137574	0	up
LOC102158871	miscRNA			ssc:102158871	uncharacterized LOC102158871	67.0473939	0.048380721	10.43653328	0	up
LOC102158871	miscRNA			ssc:102158871	uncharacterized LOC102158871	67.0473939	0.048380721	10.43653328	0	up
LOC102158871	miscRNA			ssc:102158871	uncharacterized LOC102158871	67.0473939	0.048380721	10.43653328	0	up
LOC102166009	miscRNA			ssc:102166009	uncharacterized LOC102166009	90.15549136	0.220820558	8.673397065	0	up
LOC102166009	miscRNA			ssc:102166009	uncharacterized LOC102166009	90.15549136	0.220820558	8.673397065	0	up
LOC102166009	miscRNA			ssc:102166009	uncharacterized LOC102166009	90.15549136	0.220820558	8.673397065	0	up
LOC102166480	miscRNA			ssc:102166480	uncharacterized LOC102166480	48.20242553	0.546950599	6.461551401	0	up
LOC102166480	miscRNA			ssc:102166480	uncharacterized LOC102166480	48.20242553	0.546950599	6.461551401	0	up
LOC102166480	miscRNA			ssc:102166480	uncharacterized LOC102166480	48.20242553	0.546950599	6.461551401	0	up
LOC100512812	miscRNA			ssc:100512812	protein bassoon-like	76.93010225	13.71789062	2.487489568	4.83E-11	up
LOC100512812	miscRNA			ssc:100512812	protein bassoon-like	76.93010225	13.71789062	2.487489568	4.83E-11	up
LOC100512812	miscRNA			ssc:100512812	protein bassoon-like	76.93010225	13.71789062	2.487489568	4.83E-11	up
LOC102164297	miscRNA			ssc:102164297	uncharacterized LOC102164297	235.1987698	1.80501825	7.02572328	0	up
LOC102164297	miscRNA			ssc:102164297	uncharacterized LOC102164297	235.1987698	1.80501825	7.02572328	0	up
LOC102164297	miscRNA			ssc:102164297	uncharacterized LOC102164297	235.1987698	1.80501825	7.02572328	0	up
LOC102167797	miscRNA			ssc:102167797	uncharacterized LOC102167797	36.86637772	0.27774932	7.052378484	0	up
LOC102167797	miscRNA			ssc:102167797	uncharacterized LOC102167797	36.86637772	0.27774932	7.052378484	0	up
LOC102167797	miscRNA			ssc:102167797	uncharacterized LOC102167797	36.86637772	0.27774932	7.052378484	0	up
LOC100624148	miscRNA			ssc:100624148	uncharacterized LOC100624148	43.93929644	0.152311305	8.172344928	7.33E-15	up
LOC100624148	miscRNA			ssc:100624148	uncharacterized LOC100624148	43.93929644	0.152311305	8.172344928	7.33E-15	up
LOC100624148	miscRNA			ssc:100624148	uncharacterized LOC100624148	43.93929644	0.152311305	8.172344928	7.33E-15	up
LOC102167383	miscRNA			ssc:102167383	uncharacterized LOC102167383	373.2175741	1.316100653	8.147603283	0	up
LOC102167383	miscRNA			ssc:102167383	uncharacterized LOC102167383	373.2175741	1.316100653	8.147603283	0	up
LOC102167383	miscRNA			ssc:102167383	uncharacterized LOC102167383	373.2175741	1.316100653	8.147603283	0	up
LOC102166044	miscRNA			ssc:102166044	uncharacterized LOC102166044	59.82914123	1.079413184	5.792529237	0	up
LOC102166044	miscRNA			ssc:102166044	uncharacterized LOC102166044	59.82914123	1.079413184	5.792529237	0	up
LOC102166044	miscRNA			ssc:102166044	uncharacterized LOC102166044	59.82914123	1.079413184	5.792529237	0	up
LOC102159756	miscRNA			ssc:102159756	uncharacterized LOC102159756	522.2333138	2.777892782	7.554559765	0	up
LOC102159756	miscRNA			ssc:102159756	uncharacterized LOC102159756	522.2333138	2.777892782	7.554559765	0	up
LOC102159756	miscRNA			ssc:102159756	uncharacterized LOC102159756	522.2333138	2.777892782	7.554559765	0	up
LOC100518122	miscRNA			ssc:100518122	uncharacterized LOC100518122	299.727042	1.915693594	7.289638615	0	up
LOC100518122	miscRNA			ssc:100518122	uncharacterized LOC100518122	299.727042	1.915693594	7.289638615	0	up
LOC100518122	miscRNA			ssc:100518122	uncharacterized LOC100518122	299.727042	1.915693594	7.289638615	0	up
LOC102158422	miscRNA			ssc:102158422	uncharacterized LOC102158422	74.50786981	0.048380721	10.58874484	0	up
LOC102158422	miscRNA			ssc:102158422	uncharacterized LOC102158422	74.50786981	0.048380721	10.58874484	0	up
LOC102158422	miscRNA			ssc:102158422	uncharacterized LOC102158422	74.50786981	0.048380721	10.58874484	0	up
LOC102167364	miscRNA			ssc:102167364	uncharacterized LOC102167364	13.6129463	0.166649592	6.352017755	2.59E-07	up
LOC102167364	miscRNA			ssc:102167364	uncharacterized LOC102167364	13.6129463	0.166649592	6.352017755	2.59E-07	up
LOC102167364	miscRNA			ssc:102167364	uncharacterized LOC102167364	13.6129463	0.166649592	6.352017755	2.59E-07	up
LOC102165184	miscRNA			ssc:102165184	zinc finger protein 850-like	8.429368886	53.52447757	-2.666702285	0.040175927	down
LOC102165184	miscRNA			ssc:102165184	zinc finger protein 850-like	8.429368886	53.52447757	-2.666702285	0.040175927	down
LOC102165184	miscRNA			ssc:102165184	zinc finger protein 850-like	8.429368886	53.52447757	-2.666702285	0.040175927	down
LOC102165184	miscRNA			ssc:102165184	zinc finger protein 850-like	8.429368886	53.52447757	-2.666702285	0.040175927	down
LOC102165185	miscRNA			ssc:102165185	uncharacterized LOC102165185	53.48289224	0.166649592	8.326115892	0	up
LOC102165185	miscRNA			ssc:102165185	uncharacterized LOC102165185	53.48289224	0.166649592	8.326115892	0	up
LOC102165185	miscRNA			ssc:102165185	uncharacterized LOC102165185	53.48289224	0.166649592	8.326115892	0	up
LOC102158880	miscRNA			ssc:102158880	uncharacterized LOC102158880	443.3654256	4.351614222	6.670801795	0	up
LOC102158880	miscRNA			ssc:102158880	uncharacterized LOC102158880	443.3654256	4.351614222	6.670801795	0	up
LOC102158880	miscRNA			ssc:102158880	uncharacterized LOC102158880	443.3654256	4.351614222	6.670801795	0	up
LOC102166023	miscRNA			ssc:102166023	uncharacterized LOC102166023	495.2496444	2.269121309	7.76987839	0	up
LOC102166023	miscRNA			ssc:102166023	uncharacterized LOC102166023	495.2496444	2.269121309	7.76987839	0	up
LOC102166023	miscRNA			ssc:102166023	uncharacterized LOC102166023	495.2496444	2.269121309	7.76987839	0	up
LOC102157550	miscRNA			ssc:102157550	uncharacterized LOC102157550	196.1039382	0.490021837	8.64455675	0	up
LOC102157550	miscRNA			ssc:102157550	uncharacterized LOC102157550	196.1039382	0.490021837	8.64455675	0	up
LOC102157550	miscRNA			ssc:102157550	uncharacterized LOC102157550	196.1039382	0.490021837	8.64455675	0	up
LOC102163268	lncRNA	chr5:22705008-22706669	+	ssc:102163268	uncharacterized LOC102163268	85.06880324	0.317582	8.065357203	0	up
LOC102163268	lncRNA	chr5:22705008-22706669	+	ssc:102163268	uncharacterized LOC102163268	85.06880324	0.317582	8.065357203	0	up
LOC102163268	lncRNA	chr5:22705008-22706669	+	ssc:102163268	uncharacterized LOC102163268	85.06880324	0.317582	8.065357203	0	up
LOC102166779	lncRNA	chr18:2267019-2267890	+	ssc:102166779	uncharacterized LOC102166779	16.76184848	0	20	6.75E-05	up
LOC102166779	lncRNA	chr18:2267019-2267890	+	ssc:102166779	uncharacterized LOC102166779	16.76184848	0	20	6.75E-05	up
LOC102166779	lncRNA	chr18:2267019-2267890	+	ssc:102166779	uncharacterized LOC102166779	16.76184848	0	20	6.75E-05	up
LOC102166779	lncRNA	chr18:2267019-2267890	+	ssc:102166779	uncharacterized LOC102166779	16.76184848	0	20	6.75E-05	up
LOC102167626	lncRNA	chr14:99534988-99555627	+	ssc:102167626	uncharacterized LOC102167626	43.98774108	0.152311305	8.173934675	0	up
LOC102167626	lncRNA	chr14:99534988-99555627	+	ssc:102167626	uncharacterized LOC102167626	43.98774108	0.152311305	8.173934675	0	up
LOC102167626	lncRNA	chr14:99534988-99555627	+	ssc:102167626	uncharacterized LOC102167626	43.98774108	0.152311305	8.173934675	0	up
LOC102163267	lncRNA	chr6:13201670-13206317	+	ssc:102163267	uncharacterized LOC102163267	1112.046913	5.616002248	7.629458422	0	up
LOC102163267	lncRNA	chr6:13201670-13206317	+	ssc:102163267	uncharacterized LOC102163267	1112.046913	5.616002248	7.629458422	0	up
LOC102163267	lncRNA	chr6:13201670-13206317	+	ssc:102163267	uncharacterized LOC102163267	1112.046913	5.616002248	7.629458422	0	up
LOC102167627	lncRNA	chr2:487341-488443	+	ssc:102167627	uncharacterized LOC102167627	245.1783674	0.843299826	8.183570321	0	up
LOC102167627	lncRNA	chr2:487341-488443	+	ssc:102167627	uncharacterized LOC102167627	245.1783674	0.843299826	8.183570321	0	up
LOC102167627	lncRNA	chr2:487341-488443	+	ssc:102167627	uncharacterized LOC102167627	245.1783674	0.843299826	8.183570321	0	up
LOC102161085	lncRNA	chr16:70445373-70449625	-	ssc:102161085	uncharacterized LOC102161085	83.66390843	0.215030313	8.603921537	0	up
LOC102161085	lncRNA	chr16:70445373-70449625	-	ssc:102161085	uncharacterized LOC102161085	83.66390843	0.215030313	8.603921537	0	up
LOC102161085	lncRNA	chr16:70445373-70449625	-	ssc:102161085	uncharacterized LOC102161085	83.66390843	0.215030313	8.603921537	0	up
LOC102166775	lncRNA	chr15:98178197-98184017	+	ssc:102166775	uncharacterized LOC102166775	114.2809265	0.374510761	8.253361748	0	up
LOC102166775	lncRNA	chr15:98178197-98184017	+	ssc:102166775	uncharacterized LOC102166775	114.2809265	0.374510761	8.253361748	0	up
LOC102166775	lncRNA	chr15:98178197-98184017	+	ssc:102166775	uncharacterized LOC102166775	114.2809265	0.374510761	8.253361748	0	up
LOC102164597	lncRNA	chr10:11068498-11072242	-	ssc:102164597	uncharacterized LOC102164597	19.91075065	0.048380721	8.684899635	1.36E-12	up
LOC102164597	lncRNA	chr10:11068498-11072242	-	ssc:102164597	uncharacterized LOC102164597	19.91075065	0.048380721	8.684899635	1.36E-12	up
LOC102164597	lncRNA	chr10:11068498-11072242	-	ssc:102164597	uncharacterized LOC102164597	19.91075065	0.048380721	8.684899635	1.36E-12	up
LOC102166773	lncRNA	chr2:7438845-7442852	+	ssc:102166773	uncharacterized LOC102166773	43.01884811	0.055549864	9.596969802	0	up
LOC102166773	lncRNA	chr2:7438845-7442852	+	ssc:102166773	uncharacterized LOC102166773	43.01884811	0.055549864	9.596969802	0	up
LOC102166773	lncRNA	chr2:7438845-7442852	+	ssc:102166773	uncharacterized LOC102166773	43.01884811	0.055549864	9.596969802	0	up
LOC102166772	lncRNA	chr14:110908911-110939840	-	ssc:102166772	uncharacterized LOC102166772	45.05352336	0.263411033	7.418180349	0	up
LOC102166772	lncRNA	chr14:110908911-110939840	-	ssc:102166772	uncharacterized LOC102166772	45.05352336	0.263411033	7.418180349	0	up
LOC102166772	lncRNA	chr14:110908911-110939840	-	ssc:102166772	uncharacterized LOC102166772	45.05352336	0.263411033	7.418180349	0	up
LOC100512993	lncRNA	chr17:45744387-45746165	+	ssc:100512993	uncharacterized LOC100512993	14.63028393	0.83750958	4.126708265	0.003377868	up
LOC100512993	lncRNA	chr17:45744387-45746165	+	ssc:100512993	uncharacterized LOC100512993	14.63028393	0.83750958	4.126708265	0.003377868	up
LOC100512993	lncRNA	chr17:45744387-45746165	+	ssc:100512993	uncharacterized LOC100512993	14.63028393	0.83750958	4.126708265	0.003377868	up
LOC100512993	lncRNA	chr17:45744387-45746165	+	ssc:100512993	uncharacterized LOC100512993	14.63028393	0.83750958	4.126708265	0.003377868	up
LOC102161079	lncRNA	chr14:136807053-136870595	-	ssc:102161079	uncharacterized LOC102161079	10.46404413	0.048380721	7.756792553	2.34E-06	up
LOC102161079	lncRNA	chr14:136807053-136870595	-	ssc:102161079	uncharacterized LOC102161079	10.46404413	0.048380721	7.756792553	2.34E-06	up
LOC102161079	lncRNA	chr14:136807053-136870595	-	ssc:102161079	uncharacterized LOC102161079	10.46404413	0.048380721	7.756792553	2.34E-06	up
LOC102166767	lncRNA	chr13:35598541-35600413	+	ssc:102166767	uncharacterized LOC102166767	44.03618573	0.158101551	8.121694179	0	up
LOC102166767	lncRNA	chr13:35598541-35600413	+	ssc:102166767	uncharacterized LOC102166767	44.03618573	0.158101551	8.121694179	0	up
LOC102166767	lncRNA	chr13:35598541-35600413	+	ssc:102166767	uncharacterized LOC102166767	44.03618573	0.158101551	8.121694179	0	up
LOC102167614	lncRNA	chr16:56178344-56181192	-	ssc:102167614	uncharacterized LOC102167614	96.4532957	0.38747015	7.959601552	0	up
LOC102167614	lncRNA	chr16:56178344-56181192	-	ssc:102167614	uncharacterized LOC102167614	96.4532957	0.38747015	7.959601552	0	up
LOC102167614	lncRNA	chr16:56178344-56181192	-	ssc:102167614	uncharacterized LOC102167614	96.4532957	0.38747015	7.959601552	0	up
LOC102167613	lncRNA	chr9:73423154-73424333	+	ssc:102167613	uncharacterized LOC102167613	6.249359692	0.055549864	6.813781191	0.009197628	up
LOC102167613	lncRNA	chr9:73423154-73424333	+	ssc:102167613	uncharacterized LOC102167613	6.249359692	0.055549864	6.813781191	0.009197628	up
LOC102167613	lncRNA	chr9:73423154-73424333	+	ssc:102167613	uncharacterized LOC102167613	6.249359692	0.055549864	6.813781191	0.009197628	up
LOC102164588	lncRNA	chr2:142546665-142573659	-	ssc:102164588	uncharacterized LOC102164588	413.0875201	9.722500275	5.408976294	0	up
LOC102164588	lncRNA	chr2:142546665-142573659	-	ssc:102164588	uncharacterized LOC102164588	413.0875201	9.722500275	5.408976294	0	up
LOC102164588	lncRNA	chr2:142546665-142573659	-	ssc:102164588	uncharacterized LOC102164588	413.0875201	9.722500275	5.408976294	0	up
LOC102164109	lncRNA	chr5:2680962-2683087	-	ssc:102164109	uncharacterized LOC102164109	25.14277271	0.270580176	6.5379438	1.61E-11	up
LOC102164109	lncRNA	chr5:2680962-2683087	-	ssc:102164109	uncharacterized LOC102164109	25.14277271	0.270580176	6.5379438	1.61E-11	up
LOC102164109	lncRNA	chr5:2680962-2683087	-	ssc:102164109	uncharacterized LOC102164109	25.14277271	0.270580176	6.5379438	1.61E-11	up
LOC102167619	lncRNA	chr12:19153723-19154850	-	ssc:102167619	uncharacterized LOC102167619	73.58742148	0.166649592	8.78649759	0	up
LOC102167619	lncRNA	chr12:19153723-19154850	-	ssc:102167619	uncharacterized LOC102167619	73.58742148	0.166649592	8.78649759	0	up
LOC102167619	lncRNA	chr12:19153723-19154850	-	ssc:102167619	uncharacterized LOC102167619	73.58742148	0.166649592	8.78649759	0	up
LOC102167616	lncRNA	chr11:6930384-6933046	+	ssc:102167616	uncharacterized LOC102167616	36.81793307	4.765508481	2.949706574	0.023565237	up
LOC102167616	lncRNA	chr11:6930384-6933046	+	ssc:102167616	uncharacterized LOC102167616	36.81793307	4.765508481	2.949706574	0.023565237	up
LOC102167616	lncRNA	chr11:6930384-6933046	+	ssc:102167616	uncharacterized LOC102167616	36.81793307	4.765508481	2.949706574	0.023565237	up
LOC102163253	lncRNA	chr15:53798937-53800282	+	ssc:102163253	uncharacterized LOC102163253	131.3334428	0.435850871	8.235184024	0	up
LOC102163253	lncRNA	chr15:53798937-53800282	+	ssc:102163253	uncharacterized LOC102163253	131.3334428	0.435850871	8.235184024	0	up
LOC102163253	lncRNA	chr15:53798937-53800282	+	ssc:102163253	uncharacterized LOC102163253	131.3334428	0.435850871	8.235184024	0	up
LOC102163254	lncRNA	chr2:28222662-28224725	+	ssc:102163254	uncharacterized LOC102163254	12.54716403	0.055549864	7.819362223	1.24E-06	up
LOC102163254	lncRNA	chr2:28222662-28224725	+	ssc:102163254	uncharacterized LOC102163254	12.54716403	0.055549864	7.819362223	1.24E-06	up
LOC102163254	lncRNA	chr2:28222662-28224725	+	ssc:102163254	uncharacterized LOC102163254	12.54716403	0.055549864	7.819362223	1.24E-06	up
LOC102166761	lncRNA	chr11:69457960-69459133	-	ssc:102166761	uncharacterized LOC102166761	69.1305138	0.159480449	8.759799269	0	up
LOC102166761	lncRNA	chr11:69457960-69459133	-	ssc:102166761	uncharacterized LOC102166761	69.1305138	0.159480449	8.759799269	0	up
LOC102166761	lncRNA	chr11:69457960-69459133	-	ssc:102166761	uncharacterized LOC102166761	69.1305138	0.159480449	8.759799269	0	up
LOC102161068	lncRNA	chr9:85942803-85961240	-	ssc:102161068	uncharacterized LOC102161068	24.07699044	0.270580176	6.475455113	9.01E-10	up
LOC102161068	lncRNA	chr9:85942803-85961240	-	ssc:102161068	uncharacterized LOC102161068	24.07699044	0.270580176	6.475455113	9.01E-10	up
LOC102161068	lncRNA	chr9:85942803-85961240	-	ssc:102161068	uncharacterized LOC102161068	24.07699044	0.270580176	6.475455113	9.01E-10	up
LOC102161068	lncRNA	chr9:85942803-85961240	-	ssc:102161068	uncharacterized LOC102161068	24.07699044	0.270580176	6.475455113	9.01E-10	up
LOC102164577	lncRNA	chr3:76454141-76459668	-	ssc:102164577	uncharacterized LOC102164577	106.0937808	1.82457267	5.861637665	0	up
LOC102164577	lncRNA	chr3:76454141-76459668	-	ssc:102164577	uncharacterized LOC102164577	106.0937808	1.82457267	5.861637665	0	up
LOC102164577	lncRNA	chr3:76454141-76459668	-	ssc:102164577	uncharacterized LOC102164577	106.0937808	1.82457267	5.861637665	0	up
[truncated: 2,924 more rows]
