# Supplementary material for: Integrated Analysis of LncRNA-mRNA Coexpression in the Extracellular Matrix of Developing Deciduous Teeth in Miniature Pigs
Source: Biomed Res Int. 2019 Jan 23;2019:6159490. doi: 10.1155/2019/6159490 (PMC6364112; doi:10.1155/2019/6159490)
Supplement: Supplementary Materials — Supplementary Table 1: the identified differentially expressed genes during the deciduous tooth germ transition from the cap stage to bell stage (E40 to E50) (XLS 100 kb). Supplementary Table 2: the identified differentially expressed genes during the deciduous tooth germ transition from the early bell stage to late bell stage (E50 to E60) (XLS 71kb). Supplementary Table 3: the identified differentially expressed lncRNAs during the deciduous tooth germ transition from the cap stage to the early bell stage (E40 to E50) (XLS 211kb). Supplementary Table 4: the identified differentially expressed lncRNAs during the deciduous tooth germ transition from the early bell stage to the late bell stage (E50 to E60) (XLS 626 kb). Supplementary Table 5: the significantly enriched KEGG pathways associated with the grouped DEGs (XLS 169kb). Supplementary Table 6: the expression changes of the ECM pathway genes from E40 to E50 and from E50 to E60 (XLS 11kb). Supplementary Table 7: the miRNA-target lncRNA and mRNA regulatory interactions of the ECM pathway (XLS 27kb). Supplementary Table 8: lncRNA and mRNA colocation analysis of the ECM pathway genes (XLS 30kb). Supplementary Figures: the developmental morphology of tooth germs at key development stages E40, E50, and E60 (Supplementary Figure 1). The coexpressed analysis of ECM genes and lncRNAs (Supplementary Figure 2) (DOCX 15mb). [file 6159490.f1.zip › Supplementary materials/Supplementary Table 5.xls]

Pathway Name	Pathway ID	Pvalue	Pvalue_adjusted	Genes	Count	Pop Hit	List_Total	Background Genes	URL
Protein digestion and absorption	hsa04974	4.33E-04	8.43E-02	COL6A6|0.0029809750175;ATP1B4|0.00198038960896;KCNN4|1024;COL11A2|11.5514335642;COL4A4|0.423372656181;SLC15A1|58.89200964;COL5A3|2.44528055538;COL24A1|2.75108363628;COL4A6|0.176776695297;SLC8A2|0.299369676155;COL22A1|4.59479341999;SLC8A3|2.14354692507;COL10A1|207.936613467;COL4A5|0.246558176123;COL14A1|0.334481888697;COL21A1|0.226879788829;CELA2A|163.143760297;COL6A2|0.5;COL6A3|0.420448207627;ATP…	26	90	1047	7057	http://www.kegg.jp/kegg-bin/show_pathway?hsa04974/hsa:131873%09blue/hsa:23439%09blue/hsa:3783%09red/hsa:1302%09red/hsa:1286%09blue/hsa:6564%09red/hsa:50509%09red/hsa:255631%09red/hsa:1288%09blue/hsa:6543%09blue/hsa:169044%09red/hsa:6547%09red/hsa:1300%09red/hsa:1287%09blue/hsa:7373%09blue/hsa:81578%09blue/hsa:63036%09red/hsa:1292%09blue/hsa:1293%09blue/hsa:483%09blue/hsa:3769%09red/hsa:1282%09blu…
ECM-receptor interaction	hsa04512	5.77E-04	8.43E-02	VTN|0.00330759887642;COL6A6|0.0029809750175;GP1BA|28.4429657973;TNR|16.912288649;COL4A4|0.423372656181;COL4A6|0.176776695297;ITGB7|15.1369223476;SV2A|5.69620078239;ITGA3|0.432268615654;ITGB8|0.159320078415;LAMB3|3.45814892523;CHAD|60.5476893904;IBSP|2.09943336725;COL4A5|0.246558176123;ITGA9|0.320856474391;HMMR|0.257028456664;COL6A2|0.5;COL6A3|0.420448207627;LAMA3|10.1260527518;GP9|36.00187151;THB…	24	82	1047	7057	http://www.kegg.jp/kegg-bin/show_pathway?hsa04512/hsa:7448%09blue/hsa:131873%09blue/hsa:2811%09red/hsa:7143%09red/hsa:1286%09blue/hsa:1288%09blue/hsa:3695%09red/hsa:9900%09red/hsa:3675%09blue/hsa:3696%09blue/hsa:3914%09red/hsa:1101%09red/hsa:3381%09red/hsa:1287%09blue/hsa:3680%09blue/hsa:3161%09blue/hsa:1292%09blue/hsa:1293%09blue/hsa:3909%09red/hsa:2815%09red/hsa:7057%09blue/hsa:3918%09red/hsa:1…
Oocyte meiosis	hsa04114	3.31E-03	2.60E-01	CPEB1|0.00367001073912;AR|6.10503683584;ADCY4|0.378929141628;PGR|24.9332665491;SMC1B|12.3805199483;REC8|4.78991481848;IGF1|5.35171021914;ESPL1|0.38156480224;CCNE1|0.0877778047336;ITPR2|0.327598350965;SPDYC|67.1818677519;BTRC|0.403320879611;SGO1|0.184283652161;ADCY8|3.58010028371;FBXO5|0.152830034712;PPP3CB|0.228457862557;BUB1|0.251738887514;CDC27|0.283220971324;ADCY2|0.406126198178;PKMYT1|12.7285…	30	123	1047	7057	http://www.kegg.jp/kegg-bin/show_pathway?hsa04114/hsa:64506%09blue/hsa:367%09red/hsa:196883%09blue/hsa:5241%09red/hsa:27127%09red/hsa:9985%09red/hsa:3479%09red/hsa:9700%09blue/hsa:898%09blue/hsa:3709%09blue/hsa:387778%09red/hsa:8945%09blue/hsa:151648%09blue/hsa:114%09red/hsa:26271%09blue/hsa:5532%09blue/hsa:699%09blue/hsa:996%09blue/hsa:108%09blue/hsa:9088%09red/hsa:8243%09blue/hsa:5529%09blue/hs…
Neuroactive ligand-receptor interaction	hsa04080	3.56E-03	2.60E-01	LEP|0.00675419711959;CHRNA9|0.00583925487748;CHRNA5|0.00477593858473;AVPR2|0.00515432777646;GALR3|0.00372124217986;GABRQ|0.00501338241236;GABRB3|0.00340058813788;MC4R|0.00442532767694;RXFP3|0.012090351512;GLRA3|0.00149048750875;OXTR|0.0109722255917;AGTR1|0.00184776884126;C5AR1|0.00287943206502;NMUR1|12.7285837401;CHRNB2|2.26576777059;GRM4|10.6294865128;OPRM1|0.00183500536956;GABRG2|10.5560632862;…	58	278	1047	7057	http://www.kegg.jp/kegg-bin/show_pathway?hsa04080/hsa:3952%09blue/hsa:55584%09blue/hsa:1138%09blue/hsa:554%09blue/hsa:8484%09blue/hsa:55879%09blue/hsa:2562%09blue/hsa:4160%09blue/hsa:51289%09blue/hsa:8001%09blue/hsa:5021%09blue/hsa:185%09blue/hsa:728%09blue/hsa:10316%09red/hsa:1141%09red/hsa:2914%09red/hsa:4988%09blue/hsa:2566%09red/hsa:2587%09red/hsa:3269%09blue/hsa:2847%09blue/hsa:1144%09blue/h…
Calcium signaling pathway	hsa04020	8.14E-03	4.76E-01	ATP2B3|0.00497875245047;PRKCB|0.00177249835023;PDE1A|0.00749425093223;OXTR|0.0109722255917;AGTR1|0.00184776884126;HRH1|0.00203606593914;ADCY4|0.378929141628;PLCG2|0.417543959714;GRIN2C|4.59479341999;HTR7|2.44528055538;CCKAR|4.78991481848;CACNA1I|2.18858740252;LTB4R2|3.6807506025;P2RX6|2.08493152168;CACNA1F|16.0;GRIN2D|7.361501205;SPHK1|11.6317801386;ADRA1D|67.6491545959;NOS3|2.67585510957;GNA14|2…	39	180	1047	7057	http://www.kegg.jp/kegg-bin/show_pathway?hsa04020/hsa:492%09blue/hsa:5579%09blue/hsa:5136%09blue/hsa:5021%09blue/hsa:185%09blue/hsa:3269%09blue/hsa:196883%09blue/hsa:5336%09blue/hsa:2905%09red/hsa:3363%09red/hsa:886%09red/hsa:8911%09red/hsa:56413%09red/hsa:9127%09red/hsa:778%09red/hsa:2906%09red/hsa:8877%09red/hsa:146%09red/hsa:4846%09red/hsa:9630%09red/hsa:84812%09red/hsa:487%09red/hsa:952%09red…
Cell cycle	hsa04110	1.33E-02	6.25E-01	CDKN2A|0.00335377123608;SMC1B|12.3805199483;ESPL1|0.38156480224;CCNE1|0.0877778047336;CDC6|0.228457862557;CCNB3|0.231647015473;GADD45B|4.89056111077;ATR|0.266092545613;WEE1|0.287174588749;BUB1|0.251738887514;CDC27|0.283220971324;ORC3|0.279321784518;TTK|0.230046912656;PKMYT1|12.7285837401;SMC1A|0.460093825312;TGFB3|4.92457765338;BUB1B|0.0785633359076;SKP2|0.351111218934;E2F5|5.50216727256;MCM4|0.3…	28	124	1047	7057	http://www.kegg.jp/kegg-bin/show_pathway?hsa04110/hsa:1029%09blue/hsa:27127%09red/hsa:9700%09blue/hsa:898%09blue/hsa:990%09blue/hsa:85417%09blue/hsa:4616%09red/hsa:545%09blue/hsa:7465%09blue/hsa:699%09blue/hsa:996%09blue/hsa:23595%09blue/hsa:7272%09blue/hsa:9088%09red/hsa:8243%09blue/hsa:7043%09red/hsa:701%09blue/hsa:6502%09blue/hsa:1875%09red/hsa:4173%09blue/hsa:902%09red/hsa:894%09blue/hsa:4171…
Amphetamine addiction	hsa05031	1.61E-02	6.25E-01	PRKCB|0.00177249835023;CREB3L3|0.00571908474979;DDC|0.00436440288309;SLC6A3|9.12610972695;GRIN2C|4.59479341999;STX1A|0.293208737308;SLC18A1|10.1964850186;GRIN2D|7.361501205;PPP1R1B|0.238159499511;GRIA3|0.295248165357;FOS|0.151774360549;GRIN3B|17.3877578004;CREB3L4|3.34035167771;PPP3CB|0.228457862557;SLC18A2|150.122873502;CREB3|2.58470566127;PPP1CB|0.216134307827	17	67	1047	7057	http://www.kegg.jp/kegg-bin/show_pathway?hsa05031/hsa:5579%09blue/hsa:84699%09blue/hsa:1644%09blue/hsa:6531%09red/hsa:2905%09red/hsa:6804%09blue/hsa:6570%09red/hsa:2906%09red/hsa:84152%09blue/hsa:2892%09blue/hsa:2353%09blue/hsa:116444%09red/hsa:148327%09red/hsa:5532%09blue/hsa:6571%09red/hsa:10488%09red/hsa:5500%09blue
Pathways in cancer	hsa05200	1.90E-02	6.25E-01	PRKCB|0.00177249835023;AGTR1|0.00184776884126;CDKN2A|0.00335377123608;RAC2|6.68070335543;FGF23|8.57418770029;AR|6.10503683584;NTRK1|2.82842712475;ADCY4|0.378929141628;PLCG2|0.417543959714;RASSF5|3.50642288526;DAPK2|0.0009765625;GLI2|0.281264621172;FGF21|5.38893430746;FGF4|0.0009765625;WNT8B|28.4429657973;COL4A4|0.423372656181;SUFU|0.426317445884;IGF1|5.35171021914;COL4A6|0.176776695297;FZD9|23.58…	74	397	1047	7057	http://www.kegg.jp/kegg-bin/show_pathway?hsa05200/hsa:5579%09blue/hsa:185%09blue/hsa:1029%09blue/hsa:5880%09red/hsa:8074%09red/hsa:367%09red/hsa:4914%09red/hsa:196883%09blue/hsa:5336%09blue/hsa:83593%09red/hsa:23604%09blue/hsa:2736%09blue/hsa:26291%09red/hsa:2249%09blue/hsa:7479%09red/hsa:1286%09blue/hsa:51684%09blue/hsa:3479%09red/hsa:1288%09blue/hsa:8326%09red/hsa:57121%09red/hsa:2308%09red/hsa…
Homologous recombination	hsa03440	2.07E-02	6.25E-01	FSBP|0.211686328091;XRCC2|0.323088207659;RAD54L|3.94493081797;NBN|0.189464570814;MRE11|0.327598350965;XRCC3|9.51365692002;RPA1|0.426317445884;EME1|50.9143349603;SYCP3|1024	9	29	1047	7057	http://www.kegg.jp/kegg-bin/show_pathway?hsa03440/hsa:100861412%09blue/hsa:7516%09blue/hsa:8438%09red/hsa:4683%09blue/hsa:4361%09blue/hsa:7517%09red/hsa:6117%09blue/hsa:146956%09red/hsa:50511%09red
p53 signaling pathway	hsa04115	2.14E-02	6.25E-01	TNFRSF10B|0.00161976473792;CDKN2A|0.00335377123608;SIAH1|0.312082637225;IGF1|5.35171021914;PIDD1|3.11665831864;CCNE1|0.0877778047336;CCNB3|0.231647015473;GADD45B|4.89056111077;ATR|0.266092545613;MDM4|0.253489869948;APAF1|0.25881623096;EI24|0.358488812004;CASP3|0.233258247884;THBS1|0.31864015683;SESN3|0.266092545613;TP53I3|5.81589006928;CCND2|0.466516495768	17	69	1047	7057	http://www.kegg.jp/kegg-bin/show_pathway?hsa04115/hsa:8795%09blue/hsa:1029%09blue/hsa:6477%09blue/hsa:3479%09red/hsa:55367%09red/hsa:898%09blue/hsa:85417%09blue/hsa:4616%09red/hsa:545%09blue/hsa:4194%09blue/hsa:317%09blue/hsa:9538%09blue/hsa:836%09blue/hsa:7057%09blue/hsa:143686%09blue/hsa:9540%09red/hsa:894%09blue
Ubiquitin mediated proteolysis	hsa04120	2.76E-02	6.30E-01	UBE2U|0.00136205436167;KEAP1|22.0086690902;SIAH1|0.312082637225;AIRE|27.8576180255;PRKN|2.60268371088;CBLB|0.285190928967;TRAF6|0.213158722942;CBLC|3.53081198516;SYVN1|4.19886673449;BRCA1|0.163799175482;BTRC|0.403320879611;FBXO2|11.2355590059;BIRC3|0.309926924985;UBA7|8.22491061325;HERC1|0.426317445884;UBE2J1|0.435275281648;CUL5|0.234880687304;BIRC6|0.309926924985;CDC27|0.283220971324;ERCC8|0.120…	29	137	1047	7057	http://www.kegg.jp/kegg-bin/show_pathway?hsa04120/hsa:148581%09blue/hsa:9817%09red/hsa:6477%09blue/hsa:326%09red/hsa:5071%09red/hsa:868%09blue/hsa:7189%09blue/hsa:23624%09red/hsa:84447%09red/hsa:672%09blue/hsa:8945%09blue/hsa:26232%09red/hsa:330%09blue/hsa:7318%09red/hsa:8925%09blue/hsa:51465%09blue/hsa:8065%09blue/hsa:57448%09blue/hsa:996%09blue/hsa:1161%09blue/hsa:8924%09blue/hsa:51619%09red/hs…
Primary bile acid biosynthesis	hsa00120	3.02E-02	6.30E-01	CH25H|0.00111402706628;AKR1C4|29.8570557292;CYP39A1|0.299369676155;CYP7B1|0.236514411681;CYP27A1|3.91768119035;ACOT8|2.75108363628	6	17	1047	7057	http://www.kegg.jp/kegg-bin/show_pathway?hsa00120/hsa:9023%09blue/hsa:1109%09red/hsa:51302%09blue/hsa:9420%09blue/hsa:1593%09red/hsa:10005%09red
Phenylalanine metabolism	hsa00360	3.02E-02	6.30E-01	ALDH3A1|0.0016085762056;PAH|0.00744248435972;GLYAT|0.0041004557954;DDC|0.00436440288309;AOC3|2.04202425141;AOC2|7.41270449512	6	17	1047	7057	http://www.kegg.jp/kegg-bin/show_pathway?hsa00360/hsa:218%09blue/hsa:5053%09blue/hsa:10249%09blue/hsa:1644%09blue/hsa:8639%09red/hsa:314%09red
GABAergic synapse	hsa04727	3.09E-02	6.30E-01	GABRQ|0.00501338241236;GABRB3|0.00340058813788;PRKCB|0.00177249835023;GABARAP|0.00193963378015;SLC38A3|0.00140034692189;GABRG2|10.5560632862;ADCY4|0.378929141628;CACNA1F|16.0;GABRR1|16.5642387815;SLC12A5|22.3158986616;GABRA2|0.226879788829;GNAO1|4.3469394501;SRC|0.493116352247;GNG13|1024;ADCY8|3.58010028371;TRAK2|0.32533546386;ADCY2|0.406126198178;SLC38A1|2.73208051351;GNG3|45.8865679365;GNG10|0.…	20	88	1047	7057	http://www.kegg.jp/kegg-bin/show_pathway?hsa04727/hsa:55879%09blue/hsa:2562%09blue/hsa:5579%09blue/hsa:11337%09blue/hsa:10991%09blue/hsa:2566%09red/hsa:196883%09blue/hsa:778%09red/hsa:2569%09red/hsa:57468%09red/hsa:2555%09blue/hsa:2775%09red/hsa:6714%09blue/hsa:51764%09red/hsa:114%09red/hsa:66008%09blue/hsa:108%09blue/hsa:81539%09red/hsa:2785%09red/hsa:2790%09blue
Focal adhesion	hsa04510	3.35E-02	6.30E-01	VTN|0.00330759887642;PRKCB|0.00177249835023;RAC2|6.68070335543;COL6A6|0.0029809750175;PARVG|7.31065160184;TNR|16.912288649;COL4A4|0.423372656181;IGF1|5.35171021914;SHC3|0.353553390593;COL4A6|0.176776695297;ITGB7|15.1369223476;ITGA3|0.432268615654;ITGB8|0.159320078415;SRC|0.493116352247;LAMB3|3.45814892523;CHAD|60.5476893904;IBSP|2.09943336725;BCL2|0.196146024474;BIRC3|0.309926924985;PDGFC|0.26794…	40	203	1047	7057	http://www.kegg.jp/kegg-bin/show_pathway?hsa04510/hsa:7448%09blue/hsa:5579%09blue/hsa:5880%09red/hsa:131873%09blue/hsa:64098%09red/hsa:7143%09red/hsa:1286%09blue/hsa:3479%09red/hsa:53358%09blue/hsa:1288%09blue/hsa:3695%09red/hsa:3675%09blue/hsa:3696%09blue/hsa:6714%09blue/hsa:3914%09red/hsa:1101%09red/hsa:3381%09red/hsa:596%09blue/hsa:330%09blue/hsa:56034%09blue/hsa:1287%09blue/hsa:6655%09blue/hs…
Transcriptional misregulation in cancer	hsa05202	3.45E-02	6.30E-01	IL2RB|0.00340058813788;CEBPE|0.00293993505354;IL1R2|0.00202200180438;NTRK1|2.82842712475;TMPRSS2|0.00108356393757;CD86|35.5062231062;CD14|9.38267959386;PTCRA|13.269112733;IGF1|5.35171021914;LYL1|4.62675273562;PROM1|0.351111218934;ITGB7|15.1369223476;MMP3|9.25350547124;FOXO1|2.37841423001;ARNT2|0.236514411681;GRIA3|0.295248165357;ETV7|48.8402946867;CCNT1|0.257028456664;SIX4|0.287174588749;FCGR1A|9…	36	180	1047	7057	http://www.kegg.jp/kegg-bin/show_pathway?hsa05202/hsa:3560%09blue/hsa:1053%09blue/hsa:7850%09blue/hsa:4914%09red/hsa:7113%09blue/hsa:942%09red/hsa:929%09red/hsa:171558%09red/hsa:3479%09red/hsa:4066%09red/hsa:8842%09blue/hsa:3695%09red/hsa:4314%09red/hsa:2308%09red/hsa:9915%09blue/hsa:2892%09blue/hsa:51513%09red/hsa:904%09blue/hsa:51804%09blue/hsa:2209%09red/hsa:330%09blue/hsa:7403%09blue/hsa:4291…
Mismatch repair	hsa03430	4.37E-02	7.17E-01	EXO1|0.255253031427;MLH3|0.329876977693;MSH6|0.341510064189;RFC1|0.307786103336;RPA1|0.426317445884;MSH2|0.327598350965;PCNA|0.122427537198	7	23	1047	7057	http://www.kegg.jp/kegg-bin/show_pathway?hsa03430/hsa:9156%09blue/hsa:27030%09blue/hsa:2956%09blue/hsa:5981%09blue/hsa:6117%09blue/hsa:4436%09blue/hsa:5111%09blue
Dorso-ventral axis formation	hsa04320	4.56E-02	7.17E-01	CPEB1|0.00367001073912;SPIRE2|2.77021893622;NOTCH4|5.97939699454;ETV7|48.8402946867;SOS2|0.291183396617;MAP2K1|3.03143313302;NOTCH2|0.453759577659;CPEB4|3.24900958542	8	28	1047	7057	http://www.kegg.jp/kegg-bin/show_pathway?hsa04320/hsa:64506%09blue/hsa:84501%09red/hsa:4855%09red/hsa:51513%09red/hsa:6655%09blue/hsa:5604%09red/hsa:4853%09blue/hsa:80315%09red
Aldosterone synthesis and secretion	hsa04925	4.77E-02	7.17E-01	PRKCB|0.00177249835023;AGTR1|0.00184776884126;CREB3L3|0.00571908474979;ADCY4|0.378929141628;CACNA1I|2.18858740252;CYP21A2|26.7228134217;CACNA1F|16.0;SCARB1|0.429282718219;CAMK1G|4.95883079976;CACNA1G|0.453759577659;ITPR2|0.327598350965;ADCY8|3.58010028371;STAR|79.3412927961;CREB3L4|3.34035167771;LIPE|5.77571678209;ADCY2|0.406126198178;CAMK1|9.98664439121;CREB3|2.58470566127	18	81	1047	7057	http://www.kegg.jp/kegg-bin/show_pathway?hsa04925/hsa:5579%09blue/hsa:185%09blue/hsa:84699%09blue/hsa:196883%09blue/hsa:8911%09red/hsa:1589%09red/hsa:778%09red/hsa:949%09blue/hsa:57172%09red/hsa:8913%09blue/hsa:3709%09blue/hsa:114%09red/hsa:6770%09red/hsa:148327%09red/hsa:3991%09red/hsa:108%09blue/hsa:8536%09red/hsa:10488%09red
Histidine metabolism	hsa00340	5.41E-02	7.17E-01	ALDH3A1|0.0016085762056;UROC1|3.22656703689;DDC|0.00436440288309;ASPA|0.0009765625;CARNS1|4.56305486347;ALDH2|2.21913894414;ALDH7A1|2.18858740252	7	24	1047	7057	http://www.kegg.jp/kegg-bin/show_pathway?hsa00340/hsa:218%09blue/hsa:131669%09red/hsa:1644%09blue/hsa:443%09blue/hsa:57571%09red/hsa:217%09red/hsa:501%09red
Fanconi anemia pathway	hsa03460	5.54E-02	7.17E-01	FANCG|0.00504825324468;FANCM|0.16154410383;POLI|0.251738887514;BRCA1|0.163799175482;BRIP1|0.246558176123;RMI1|9.84915530676;ATR|0.266092545613;EME2|4.37717480504;FAN1|0.36349312933;FANCD2|0.336808394216;RPA1|0.426317445884;EME1|50.9143349603;FANCL|6.36429187004	13	55	1047	7057	http://www.kegg.jp/kegg-bin/show_pathway?hsa03460/hsa:2189%09blue/hsa:57697%09blue/hsa:11201%09blue/hsa:672%09blue/hsa:83990%09blue/hsa:80010%09red/hsa:545%09blue/hsa:197342%09red/hsa:22909%09blue/hsa:2177%09blue/hsa:6117%09blue/hsa:146956%09red/hsa:55120%09red
Ovarian steroidogenesis	hsa04913	5.80E-02	7.17E-01	PLA2G4E|0.00209330754402;CYP1A1|0.00548611279585;BMP15|1024;ADCY4|0.378929141628;SCARB1|0.429282718219;IGF1|5.35171021914;ALOX5|12.1257325321;HSD17B1|6.45313407378;LHB|6.82107913414;ADCY8|3.58010028371;STAR|79.3412927961;ADCY2|0.406126198178	12	50	1047	7057	http://www.kegg.jp/kegg-bin/show_pathway?hsa04913/hsa:123745%09blue/hsa:1543%09blue/hsa:9210%09red/hsa:196883%09blue/hsa:949%09blue/hsa:3479%09red/hsa:240%09red/hsa:3292%09red/hsa:3972%09red/hsa:114%09red/hsa:6770%09red/hsa:108%09blue
Nicotine addiction	hsa05033	6.27E-02	7.17E-01	GABRQ|0.00501338241236;GABRB3|0.00340058813788;CHRNB2|2.26576777059;GABRG2|10.5560632862;GRIN2C|4.59479341999;GABRR1|16.5642387815;GRIN2D|7.361501205;GABRA2|0.226879788829;GRIA3|0.295248165357;GRIN3B|17.3877578004	10	40	1047	7057	http://www.kegg.jp/kegg-bin/show_pathway?hsa05033/hsa:55879%09blue/hsa:2562%09blue/hsa:1141%09red/hsa:2566%09red/hsa:2905%09red/hsa:2569%09red/hsa:2906%09red/hsa:2555%09blue/hsa:2892%09blue/hsa:116444%09red
AGE-RAGE signaling pathway in diabetic complications	hsa04933	6.45E-02	7.17E-01	PRKCB|0.00177249835023;AGTR1|0.00184776884126;PLCG2|0.417543959714;NFATC1|0.0009765625;EGR1|0.160428237195;COL4A4|0.423372656181;NOS3|2.67585510957;PLCD4|11.6317801386;COL4A6|0.176776695297;AGER|17.1483754006;FOXO1|2.37841423001;BCL2|0.196146024474;COL4A5|0.246558176123;VEGFD|0.0915053559966;CASP3|0.233258247884;TGFB3|4.92457765338;TGFBR1|0.210224103813;COL4A1|0.435275281648;NOX1|809.002303348;CO…	21	101	1047	7057	http://www.kegg.jp/kegg-bin/show_pathway?hsa04933/hsa:5579%09blue/hsa:185%09blue/hsa:5336%09blue/hsa:4772%09blue/hsa:1958%09blue/hsa:1286%09blue/hsa:4846%09red/hsa:84812%09red/hsa:1288%09blue/hsa:177%09red/hsa:2308%09red/hsa:596%09blue/hsa:1287%09blue/hsa:2277%09blue/hsa:836%09blue/hsa:7043%09red/hsa:7046%09blue/hsa:1282%09blue/hsa:27035%09red/hsa:1277%09red/hsa:1281%09blue
Glycosylphosphatidylinositol(GPI)-anchor biosynthesis	hsa00563	6.59E-02	7.17E-01	DPM2|0.397768241877;PIGA|0.384218795322;PIGL|2.08493152168;PGAP1|0.16266773193;GPLD1|116.970425629;PIGH|3.38698124945;PIGF|26.5382254661	7	25	1047	7057	http://www.kegg.jp/kegg-bin/show_pathway?hsa00563/hsa:8818%09blue/hsa:5277%09blue/hsa:9487%09red/hsa:80055%09blue/hsa:2822%09red/hsa:5283%09red/hsa:5281%09red
PI3K-Akt signaling pathway	hsa04151	6.65E-02	7.17E-01	CSF3|0.00680117627575;IL2RB|0.00340058813788;VTN|0.00330759887642;GYS2|0.00166530252298;CREB3L3|0.00571908474979;FGF23|8.57418770029;COL6A6|0.0029809750175;CSF1|3.6807506025;IL7|9.84915530676;FGFR4|0.0009765625;TNR|16.912288649;FGF21|5.38893430746;FGF4|0.0009765625;COL4A4|0.423372656181;NOS3|2.67585510957;IGF1|5.35171021914;COL4A6|0.176776695297;LPAR5|47.8351759563;ITGB7|15.1369223476;CCNE1|0.087…	61	342	1047	7057	http://www.kegg.jp/kegg-bin/show_pathway?hsa04151/hsa:1440%09blue/hsa:3560%09blue/hsa:7448%09blue/hsa:2998%09blue/hsa:84699%09blue/hsa:8074%09red/hsa:131873%09blue/hsa:1435%09red/hsa:3574%09red/hsa:2264%09blue/hsa:7143%09red/hsa:26291%09red/hsa:2249%09blue/hsa:1286%09blue/hsa:4846%09red/hsa:3479%09red/hsa:1288%09blue/hsa:57121%09red/hsa:3695%09red/hsa:898%09blue/hsa:3675%09blue/hsa:23239%09blue/h…
Dilated cardiomyopathy	hsa05414	6.70E-02	7.17E-01	ADCY4|0.378929141628;SGCA|18.8958825829;CACNG5|0.0009765625;CACNA1F|16.0;IGF1|5.35171021914;MYBPC3|3.11665831864;ITGB7|15.1369223476;MYL3|0.0009765625;ITGA3|0.432268615654;MYH7|4.65893434587;ITGB8|0.159320078415;MYH6|17.7531115531;SGCD|0.295248165357;ADCY8|3.58010028371;CACNB2|3.89061978965;ITGA9|0.320856474391;ADCY2|0.406126198178;TGFB3|4.92457765338;PLN|494.55940041	19	90	1047	7057	http://www.kegg.jp/kegg-bin/show_pathway?hsa05414/hsa:196883%09blue/hsa:6442%09red/hsa:27091%09blue/hsa:778%09red/hsa:3479%09red/hsa:4607%09red/hsa:3695%09red/hsa:4634%09blue/hsa:3675%09blue/hsa:4625%09red/hsa:3696%09blue/hsa:4624%09red/hsa:6444%09blue/hsa:114%09red/hsa:783%09red/hsa:3680%09blue/hsa:108%09blue/hsa:7043%09red/hsa:5350%09red
Pancreatic secretion	hsa04972	6.88E-02	7.17E-01	ATP2B3|0.00497875245047;PRKCB|0.00177249835023;PLA2G2F|0.00135264596495;ADCY4|0.378929141628;CLCA1|26.9086852881;CCKAR|4.78991481848;ATP1B4|0.00198038960896;CLCA4|22.9432839683;ATP2A1|12.2950014503;CD38|6.23331663728;CLCA2|2.90794503464;RAB27B|0.31864015683;ITPR2|0.327598350965;ADCY8|3.58010028371;TRPC1|0.275476278969;RAP1A|0.31864015683;CELA2A|163.143760297;ADCY2|0.406126198178;ATP2B4|0.40053493…	20	96	1047	7057	http://www.kegg.jp/kegg-bin/show_pathway?hsa04972/hsa:492%09blue/hsa:5579%09blue/hsa:64600%09blue/hsa:196883%09blue/hsa:1179%09red/hsa:886%09red/hsa:23439%09blue/hsa:22802%09red/hsa:487%09red/hsa:952%09red/hsa:9635%09red/hsa:5874%09blue/hsa:3709%09blue/hsa:114%09red/hsa:7220%09blue/hsa:5906%09blue/hsa:63036%09red/hsa:108%09blue/hsa:493%09blue/hsa:483%09blue
Cytokine-cytokine receptor interaction	hsa04060	7.73E-02	7.56E-01	CSF3|0.00680117627575;LEP|0.00675419711959;IL20|0.00382586053745;IL2RB|0.00340058813788;TNFRSF4|0.00259508948066;IL21R|0.00754637756973;CXCL2|0.00312917920933;IL1R2|0.00202200180438;CCL8|0.00167688561804;CCR3|0.00537321022711;CCR1|0.00198038960896;CCL4|0.00118573719179;TNFRSF10B|0.00161976473792;TNFRSF25|0.0009765625;CCR2|4.69133979693;IL15|0.0009765625;CCL11|0.0009765625;CSF1|3.6807506025;IL7|9.…	48	265	1047	7057	http://www.kegg.jp/kegg-bin/show_pathway?hsa04060/hsa:1440%09blue/hsa:3952%09blue/hsa:50604%09blue/hsa:3560%09blue/hsa:7293%09blue/hsa:50615%09blue/hsa:2920%09blue/hsa:7850%09blue/hsa:6355%09blue/hsa:1232%09blue/hsa:1230%09blue/hsa:388372%09blue/hsa:8795%09blue/hsa:8718%09blue/hsa:729230%09red/hsa:3600%09blue/hsa:6356%09blue/hsa:1435%09red/hsa:3574%09red/hsa:268%09blue/hsa:658%09red/hsa:3601%09re…
beta-Alanine metabolism	hsa00410	7.76E-02	7.56E-01	ALDH3A1|0.0016085762056;GADL1|0.00114534663011;AOC3|2.04202425141;CARNS1|4.56305486347;AOC2|7.41270449512;EHHADH|0.174342958294;ALDH2|2.21913894414;ALDH7A1|2.18858740252	8	31	1047	7057	http://www.kegg.jp/kegg-bin/show_pathway?hsa00410/hsa:218%09blue/hsa:339896%09blue/hsa:8639%09red/hsa:57571%09red/hsa:314%09red/hsa:1962%09blue/hsa:217%09red/hsa:501%09red
Chemokine signaling pathway	hsa04062	8.24E-02	7.76E-01	CXCL2|0.00312917920933;PRKCB|0.00177249835023;CCL8|0.00167688561804;CCR3|0.00537321022711;CCR1|0.00198038960896;CCL4|0.00118573719179;CCR2|4.69133979693;DOCK2|0.00191293026872;GRK7|5.65685424949;RAC2|6.68070335543;CCL11|0.0009765625;ADCY4|0.378929141628;FGR|2.67585510957;CXCL13|1024;SHC3|0.353553390593;NCF1|6.8685234915;CXCR5|177.294011918;ITK|44.6317973232;ELMO1|5.09824250928;CCL25|4.46914855229…	35	187	1047	7057	http://www.kegg.jp/kegg-bin/show_pathway?hsa04062/hsa:2920%09blue/hsa:5579%09blue/hsa:6355%09blue/hsa:1232%09blue/hsa:1230%09blue/hsa:388372%09blue/hsa:729230%09red/hsa:1794%09blue/hsa:131890%09red/hsa:5880%09red/hsa:6356%09blue/hsa:196883%09blue/hsa:2268%09red/hsa:10563%09red/hsa:53358%09blue/hsa:653361%09red/hsa:643%09red/hsa:3702%09red/hsa:9844%09red/hsa:6370%09red/hsa:6363%09red/hsa:6714%09bl…
Thyroid hormone synthesis	hsa04918	9.54E-02	8.71E-01	PRKCB|0.00177249835023;ASGR2|0.00424505805674;CREB3L3|0.00571908474979;DUOX2|3.38698124945;ADCY4|0.378929141628;ATP1B4|0.00198038960896;GPX2|19.1596592739;ITPR2|0.327598350965;GPX3|16.6794521735;ADCY8|3.58010028371;TTF2|0.460093825312;CREB3L4|3.34035167771;ADCY2|0.406126198178;ATP1B3|0.271683715632;CREB3|2.58470566127	15	71	1047	7057	http://www.kegg.jp/kegg-bin/show_pathway?hsa04918/hsa:5579%09blue/hsa:433%09blue/hsa:84699%09blue/hsa:50506%09red/hsa:196883%09blue/hsa:23439%09blue/hsa:2877%09red/hsa:3709%09blue/hsa:2878%09red/hsa:114%09red/hsa:8458%09blue/hsa:148327%09red/hsa:108%09blue/hsa:483%09blue/hsa:10488%09red
Cocaine addiction	hsa05030	1.00E-01	8.89E-01	CREB3L3|0.00571908474979;DDC|0.00436440288309;SLC6A3|9.12610972695;GRIN2C|4.59479341999;SLC18A1|10.1964850186;GRIN2D|7.361501205;PPP1R1B|0.238159499511;GRIN3B|17.3877578004;CREB3L4|3.34035167771;SLC18A2|150.122873502;CREB3|2.58470566127	11	49	1047	7057	http://www.kegg.jp/kegg-bin/show_pathway?hsa05030/hsa:84699%09blue/hsa:1644%09blue/hsa:6531%09red/hsa:2905%09red/hsa:6570%09red/hsa:2906%09red/hsa:84152%09blue/hsa:116444%09red/hsa:148327%09red/hsa:6571%09red/hsa:10488%09red
cGMP-PKG signaling pathway	hsa04022	1.06E-01	9.09E-01	GATA4|0.012779719665;ATP2B3|0.00497875245047;AGTR1|0.00184776884126;CREB3L3|0.00571908474979;ADCY4|0.378929141628;NFATC1|0.0009765625;ATP1B4|0.00198038960896;MRVI1|0.241484082231;CACNA1F|16.0;ADRA1D|67.6491545959;NOS3|2.67585510957;ATP2A1|12.2950014503;ADRA2A|5.38893430746;SLC8A2|0.299369676155;MYH7|4.65893434587;SLC8A3|2.14354692507;KCNMB3|54.948187932;ITPR2|0.327598350965;ADCY8|3.58010028371;CR…	31	167	1047	7057	http://www.kegg.jp/kegg-bin/show_pathway?hsa04022/hsa:2626%09blue/hsa:492%09blue/hsa:185%09blue/hsa:84699%09blue/hsa:196883%09blue/hsa:4772%09blue/hsa:23439%09blue/hsa:10335%09blue/hsa:778%09red/hsa:146%09red/hsa:4846%09red/hsa:487%09red/hsa:150%09red/hsa:6543%09blue/hsa:4625%09red/hsa:6547%09red/hsa:27094%09red/hsa:3709%09blue/hsa:114%09red/hsa:148327%09red/hsa:5532%09blue/hsa:9475%09blue/hsa:10…
Aldosterone-regulated sodium reabsorption	hsa04960	1.13E-01	9.25E-01	KCNJ1|0.00897420589841;PRKCB|0.00177249835023;ATP1B4|0.00198038960896;SCNN1A|3.22656703689;SCNN1B|8.75434961009;NR3C2|2.01391110011;IGF1|5.35171021914;HSD11B2|0.184283652161;ATP1B3|0.271683715632	9	39	1047	7057	http://www.kegg.jp/kegg-bin/show_pathway?hsa04960/hsa:3758%09blue/hsa:5579%09blue/hsa:23439%09blue/hsa:6337%09red/hsa:6338%09red/hsa:4306%09red/hsa:3479%09red/hsa:3291%09blue/hsa:483%09blue
Complement and coagulation cascades	hsa04610	1.17E-01	9.25E-01	F7|0.00744248435972;VTN|0.00330759887642;C4BPB|0.00225915660919;C5AR1|0.00287943206502;C1QB|0.0009765625;C2|8.57418770029;CR1|0.219151430329;MASP1|4.99332219561;C8A|70.0347968807;SERPINC1|15.7797232719;A2M|5.16941132255;F2R|0.334481888697;PLAUR|2.96904714126;F2RL2|5.77571678209;CFB|51.2684721657;MASP2|694.581415653	16	79	1047	7057	http://www.kegg.jp/kegg-bin/show_pathway?hsa04610/hsa:2155%09blue/hsa:7448%09blue/hsa:725%09blue/hsa:728%09blue/hsa:713%09blue/hsa:717%09red/hsa:1378%09blue/hsa:5648%09red/hsa:731%09red/hsa:462%09red/hsa:2%09red/hsa:2149%09blue/hsa:5329%09red/hsa:2151%09red/hsa:629%09red/hsa:10747%09red
Insulin secretion	hsa04911	1.18E-01	9.25E-01	PRKCB|0.00177249835023;CREB3L3|0.00571908474979;KCNJ11|4.95883079976;ADCY4|0.378929141628;CCKAR|4.78991481848;ATP1B4|0.00198038960896;KCNN4|1024;SNAP25|0.307786103336;STX1A|0.293208737308;CACNA1F|16.0;RAB3A|5.93809428252;KCNMB3|54.948187932;ADCY8|3.58010028371;CREB3L4|3.34035167771;ADCY2|0.406126198178;ATP1B3|0.271683715632;CREB3|2.58470566127	17	85	1047	7057	http://www.kegg.jp/kegg-bin/show_pathway?hsa04911/hsa:5579%09blue/hsa:84699%09blue/hsa:3767%09red/hsa:196883%09blue/hsa:886%09red/hsa:23439%09blue/hsa:3783%09red/hsa:6616%09blue/hsa:6804%09blue/hsa:778%09red/hsa:5864%09red/hsa:27094%09red/hsa:114%09red/hsa:148327%09red/hsa:108%09blue/hsa:483%09blue/hsa:10488%09red
Colorectal cancer	hsa05210	1.20E-01	9.25E-01	RAC2|6.68070335543;FOS|0.151774360549;AXIN2|0.279321784518;BCL2|0.196146024474;MSH6|0.341510064189;APC2|46.5271205542;CASP3|0.233258247884;TGFB3|4.92457765338;MAP2K1|3.03143313302;TGFBR1|0.210224103813;LEF1|0.371130892657;BAD|3.89061978965;MSH2|0.327598350965	13	62	1047	7057	http://www.kegg.jp/kegg-bin/show_pathway?hsa05210/hsa:5880%09red/hsa:2353%09blue/hsa:8313%09blue/hsa:596%09blue/hsa:2956%09blue/hsa:10297%09red/hsa:836%09blue/hsa:7043%09red/hsa:5604%09red/hsa:7046%09blue/hsa:51176%09blue/hsa:572%09red/hsa:4436%09blue
Glycine, serine and threonine metabolism	hsa00260	1.28E-01	9.37E-01	PIPOX|0.00436440288309;SARDH|4.72397064572;AOC3|2.04202425141;CHDH|6.7739624989;AOC2|7.41270449512;GLYCTK|3.07375036258;GNMT|19.2929252431;CTH|0.185565446329;ALDH7A1|2.18858740252	9	40	1047	7057	http://www.kegg.jp/kegg-bin/show_pathway?hsa00260/hsa:51268%09blue/hsa:1757%09red/hsa:8639%09red/hsa:55349%09red/hsa:314%09red/hsa:132158%09red/hsa:27232%09red/hsa:1491%09blue/hsa:501%09red
Small cell lung cancer	hsa05222	1.28E-01	9.37E-01	COL4A4|0.423372656181;COL4A6|0.176776695297;CCNE1|0.0877778047336;ITGA3|0.432268615654;TRAF6|0.213158722942;LAMB3|3.45814892523;BCL2|0.196146024474;BIRC3|0.309926924985;COL4A5|0.246558176123;APAF1|0.25881623096;BCL2L1|0.463294030945;RXRG|0.18049114944;LAMA3|10.1260527518;SKP2|0.351111218934;LAMC2|3.81055199218;COL4A1|0.435275281648;CKS1B|0.275476278969	17	86	1047	7057	http://www.kegg.jp/kegg-bin/show_pathway?hsa05222/hsa:1286%09blue/hsa:1288%09blue/hsa:898%09blue/hsa:3675%09blue/hsa:7189%09blue/hsa:3914%09red/hsa:596%09blue/hsa:330%09blue/hsa:1287%09blue/hsa:317%09blue/hsa:598%09blue/hsa:6258%09blue/hsa:3909%09red/hsa:6502%09blue/hsa:3918%09red/hsa:1282%09blue/hsa:1163%09blue
Synaptic vesicle cycle	hsa04721	1.32E-01	9.42E-01	SLC18A3|0.00352050961957;ATP6V1G3|0.0009765625;SNAP25|0.307786103336;STX1A|0.293208737308;SLC18A1|10.1964850186;SYT1|0.323088207659;CPLX4|0.279321784518;ATP6V1G2|3.89061978965;RAB3A|5.93809428252;ATP6V0A4|16.4498212265;ATP6V1C2|326.287520594;SLC18A2|150.122873502;CLTC|0.38156480224	13	63	1047	7057	http://www.kegg.jp/kegg-bin/show_pathway?hsa04721/hsa:6572%09blue/hsa:127124%09blue/hsa:6616%09blue/hsa:6804%09blue/hsa:6570%09red/hsa:6857%09blue/hsa:339302%09blue/hsa:534%09red/hsa:5864%09red/hsa:50617%09red/hsa:245973%09red/hsa:6571%09red/hsa:1213%09blue
NF-kappa B signaling pathway	hsa04064	1.39E-01	9.46E-01	CXCL2|0.00312917920933;PRKCB|0.00177249835023;CCL4|0.00118573719179;PLCG2|0.417543959714;ZAP70|18.7653591877;CD14|9.38267959386;PIDD1|3.11665831864;CCL19|18.7653591877;TRAF6|0.213158722942;BLNK|5.06302637588;BCL2|0.196146024474;TAB2|0.329876977693;BIRC3|0.309926924985;TRIM25|14.3204011348;GADD45B|4.89056111077;LTB|11.1579493308;BCL2L1|0.463294030945;CSNK2B|2.42838976879	18	93	1047	7057	http://www.kegg.jp/kegg-bin/show_pathway?hsa04064/hsa:2920%09blue/hsa:5579%09blue/hsa:388372%09blue/hsa:5336%09blue/hsa:7535%09red/hsa:929%09red/hsa:55367%09red/hsa:6363%09red/hsa:7189%09blue/hsa:29760%09red/hsa:596%09blue/hsa:23118%09blue/hsa:330%09blue/hsa:7706%09red/hsa:4616%09red/hsa:4050%09red/hsa:598%09blue/hsa:1460%09red
Estrogen signaling pathway	hsa04915	1.40E-01	9.46E-01	CREB3L3|0.00571908474979;OPRM1|0.00183500536956;ADCY4|0.378929141628;ESR2|11.5514335642;GPER1|10.3388226451;NOS3|2.67585510957;SHC3|0.353553390593;GNAO1|4.3469394501;SRC|0.493116352247;FOS|0.151774360549;ITPR2|0.327598350965;FKBP5|0.408951029279;ADCY8|3.58010028371;CREB3L4|3.34035167771;SOS2|0.291183396617;ADCY2|0.406126198178;MAP2K1|3.03143313302;CREB3|2.58470566127;HSP90AA1|0.336808394216	19	99	1047	7057	http://www.kegg.jp/kegg-bin/show_pathway?hsa04915/hsa:84699%09blue/hsa:4988%09blue/hsa:196883%09blue/hsa:2100%09red/hsa:2852%09red/hsa:4846%09red/hsa:53358%09blue/hsa:2775%09red/hsa:6714%09blue/hsa:2353%09blue/hsa:3709%09blue/hsa:2289%09blue/hsa:114%09red/hsa:148327%09red/hsa:6655%09blue/hsa:108%09blue/hsa:5604%09red/hsa:10488%09red/hsa:3320%09blue
Dopaminergic synapse	hsa04728	1.47E-01	9.46E-01	PRKCB|0.00177249835023;CREB3L3|0.00571908474979;DDC|0.00436440288309;SLC6A3|9.12610972695;SLC18A1|10.1964850186;PPP1R1B|0.238159499511;GNAO1|4.3469394501;CALY|2.44528055538;GRIA3|0.295248165357;FOS|0.151774360549;ITPR2|0.327598350965;GNG13|1024;CREB3L4|3.34035167771;CLOCK|0.253489869948;PPP2R2A|0.343885454535;PPP3CB|0.228457862557;GNG3|45.8865679365;PPP2R5E|0.231647015473;PPP2R5D|6.32033049491;GN…	24	130	1047	7057	http://www.kegg.jp/kegg-bin/show_pathway?hsa04728/hsa:5579%09blue/hsa:84699%09blue/hsa:1644%09blue/hsa:6531%09red/hsa:6570%09red/hsa:84152%09blue/hsa:2775%09red/hsa:50632%09red/hsa:2892%09blue/hsa:2353%09blue/hsa:3709%09blue/hsa:51764%09red/hsa:148327%09red/hsa:9575%09blue/hsa:5520%09blue/hsa:5532%09blue/hsa:2785%09red/hsa:5529%09blue/hsa:5528%09red/hsa:2790%09blue/hsa:3799%09blue/hsa:6571%09red/…
Thyroid hormone signaling pathway	hsa04919	1.49E-01	9.46E-01	GATA4|0.012779719665;PRKCB|0.00177249835023;PLCG2|0.417543959714;ATP1B4|0.00198038960896;MED12L|2.7132086549;PLCD4|11.6317801386;DIO1|1024;FOXO1|2.37841423001;DIO2|13.5479249978;NOTCH4|5.97939699454;SRC|0.493116352247;MED14|0.336808394216;MYH6|17.7531115531;RXRG|0.18049114944;MED17|0.277392368017;MAP2K1|3.03143313302;ATP1B3|0.271683715632;DIO3|0.348685916588;BAD|3.89061978965;NOTCH2|0.45375957765…	22	118	1047	7057	http://www.kegg.jp/kegg-bin/show_pathway?hsa04919/hsa:2626%09blue/hsa:5579%09blue/hsa:5336%09blue/hsa:23439%09blue/hsa:116931%09red/hsa:84812%09red/hsa:1733%09red/hsa:2308%09red/hsa:1734%09red/hsa:4855%09red/hsa:6714%09blue/hsa:9282%09blue/hsa:4624%09red/hsa:6258%09blue/hsa:9440%09blue/hsa:5604%09red/hsa:483%09blue/hsa:1735%09blue/hsa:572%09red/hsa:4853%09blue/hsa:9969%09blue/hsa:5350%09red
Hedgehog signaling pathway	hsa04340	1.49E-01	9.46E-01	IHH|0.0076517210749;GLI2|0.281264621172;SUFU|0.426317445884;PTCH2|0.348685916588;SPOPL|0.295248165357;BTRC|0.403320879611;BCL2|0.196146024474;CSNK1G3|0.160428237195;ARRB1|0.476318999022;CCND2|0.466516495768	10	47	1047	7057	http://www.kegg.jp/kegg-bin/show_pathway?hsa04340/hsa:3549%09blue/hsa:2736%09blue/hsa:51684%09blue/hsa:8643%09blue/hsa:339745%09blue/hsa:8945%09blue/hsa:596%09blue/hsa:1456%09blue/hsa:408%09blue/hsa:894%09blue
Glycerolipid metabolism	hsa00561	1.56E-01	9.68E-01	LIPC|2.92817139189;DGAT2|0.0009765625;GK|0.366021423986;LPIN1|0.303548721099;GPAT2|84.4485062895;LPIN3|3.53081198516;GLYCTK|3.07375036258;DGKD|4.3469394501;AGPAT5|0.285190928967;ALDH2|2.21913894414;ALDH7A1|2.18858740252;PLPP1|6.58872813814	12	59	1047	7057	http://www.kegg.jp/kegg-bin/show_pathway?hsa00561/hsa:3990%09red/hsa:84649%09blue/hsa:2710%09blue/hsa:23175%09blue/hsa:150763%09red/hsa:64900%09red/hsa:132158%09red/hsa:8527%09red/hsa:55326%09blue/hsa:217%09red/hsa:501%09red/hsa:8611%09red
Hypertrophic cardiomyopathy (HCM)	hsa05410	1.61E-01	9.77E-01	SGCA|18.8958825829;CACNG5|0.0009765625;CACNA1F|16.0;IGF1|5.35171021914;MYBPC3|3.11665831864;ITGB7|15.1369223476;PRKAG2|7.31065160184;MYL3|0.0009765625;ITGA3|0.432268615654;MYH7|4.65893434587;ITGB8|0.159320078415;MYH6|17.7531115531;SGCD|0.295248165357;CACNB2|3.89061978965;ITGA9|0.320856474391;TGFB3|4.92457765338	16	83	1047	7057	http://www.kegg.jp/kegg-bin/show_pathway?hsa05410/hsa:6442%09red/hsa:27091%09blue/hsa:778%09red/hsa:3479%09red/hsa:4607%09red/hsa:3695%09red/hsa:51422%09red/hsa:4634%09blue/hsa:3675%09blue/hsa:4625%09red/hsa:3696%09blue/hsa:4624%09red/hsa:6444%09blue/hsa:783%09red/hsa:3680%09blue/hsa:7043%09red
Glutamatergic synapse	hsa04724	1.69E-01	9.86E-01	PLA2G4E|0.00209330754402;PRKCB|0.00177249835023;GRM4|10.6294865128;SLC38A3|0.00140034692189;ADCY4|0.378929141628;GRIN2C|4.59479341999;SLC1A7|20.1122139923;GRIN2D|7.361501205;GNAO1|4.3469394501;GRIA3|0.295248165357;ITPR2|0.327598350965;GRIN3B|17.3877578004;GNG13|1024;ADCY8|3.58010028371;SLC1A6|0.360982298881;TRPC1|0.275476278969;PPP3CB|0.228457862557;ADCY2|0.406126198178;SLC38A1|2.73208051351;GNG3…	21	114	1047	7057	http://www.kegg.jp/kegg-bin/show_pathway?hsa04724/hsa:123745%09blue/hsa:5579%09blue/hsa:2914%09red/hsa:10991%09blue/hsa:196883%09blue/hsa:2905%09red/hsa:6512%09red/hsa:2906%09red/hsa:2775%09red/hsa:2892%09blue/hsa:3709%09blue/hsa:116444%09red/hsa:51764%09red/hsa:114%09red/hsa:6511%09blue/hsa:7220%09blue/hsa:5532%09blue/hsa:108%09blue/hsa:81539%09red/hsa:2785%09red/hsa:2790%09blue
Axon guidance	hsa04360	1.72E-01	9.86E-01	RAC2|6.68070335543;L1CAM|2.67585510957;ABLIM2|8.63382589204;PLCG2|0.417543959714;PLXNA2|2.25011696938;EPHB1|9.44794129144;BMPR1B|18.000935755;SEMA5B|0.0009765625;LRRC4|5.35171021914;ABLIM3|6.45313407378;UNC5A|24.2514650642;UNC5D|0.378929141628;SRC|0.493116352247;F2RL2|5.77571678209;EPHB2|0.353553390593;SEMA3F|0.371130892657;CFL2|0.244855074397;EPHB6|0.266092545613;TRPC1|0.275476278969;PPP3CB|0.22…	31	176	1047	7057	http://www.kegg.jp/kegg-bin/show_pathway?hsa04360/hsa:5880%09red/hsa:3897%09red/hsa:84448%09red/hsa:5336%09blue/hsa:5362%09red/hsa:2047%09red/hsa:658%09red/hsa:54437%09blue/hsa:64101%09red/hsa:22885%09red/hsa:90249%09red/hsa:137970%09blue/hsa:6714%09blue/hsa:2151%09red/hsa:2048%09blue/hsa:6405%09blue/hsa:1073%09blue/hsa:2051%09blue/hsa:7220%09blue/hsa:5532%09blue/hsa:6092%09blue/hsa:9475%09blue/h…
PPAR signaling pathway	hsa03320	1.72E-01	9.86E-01	FABP1|0.0018223300616;PLIN4|31.1249583172;GK|0.366021423986;SORBS1|0.486327473706;ME1|0.16154410383;MMP1|8.87655577654;EHHADH|0.174342958294;ANGPTL4|3.53081198516;CYP27A1|3.91768119035;PPARA|2.4966610978;RXRG|0.18049114944;FABP3|81.5718801484;PLIN2|0.273573425315;NR1H3|2.96904714126	14	72	1047	7057	http://www.kegg.jp/kegg-bin/show_pathway?hsa03320/hsa:2168%09blue/hsa:729359%09red/hsa:2710%09blue/hsa:10580%09blue/hsa:4199%09blue/hsa:4312%09red/hsa:1962%09blue/hsa:51129%09red/hsa:1593%09red/hsa:5465%09red/hsa:6258%09blue/hsa:2170%09red/hsa:123%09blue/hsa:10062%09red
N-Glycan biosynthesis	hsa00510	1.81E-01	9.98E-01	DPM2|0.397768241877;DOLPP1|0.348685916588;ALG3|5.61777950295;ALG6|0.181746564665;ALG13|0.332171453524;MGAT5|0.358488812004;ALG10|0.251738887514;MOGS|2.63901582155;DPM3|2.25011696938;B4GALT3|4.3469394501	10	49	1047	7057	http://www.kegg.jp/kegg-bin/show_pathway?hsa00510/hsa:8818%09blue/hsa:57171%09blue/hsa:10195%09red/hsa:29929%09blue/hsa:79868%09blue/hsa:4249%09blue/hsa:84920%09blue/hsa:7841%09red/hsa:54344%09red/hsa:8703%09red
Basal cell carcinoma	hsa05217	1.84E-01	9.98E-01	GLI2|0.281264621172;WNT8B|28.4429657973;SUFU|0.426317445884;FZD9|23.5883074767;PTCH2|0.348685916588;WNT2B|12.9960383417;WNT10B|0.271683715632;AXIN2|0.279321784518;APC2|46.5271205542;FZD3|0.26061644021;LEF1|0.371130892657	11	55	1047	7057	http://www.kegg.jp/kegg-bin/show_pathway?hsa05217/hsa:2736%09blue/hsa:7479%09red/hsa:51684%09blue/hsa:8326%09red/hsa:8643%09blue/hsa:7482%09red/hsa:7480%09blue/hsa:8313%09blue/hsa:10297%09red/hsa:7976%09blue/hsa:51176%09blue
Morphine addiction	hsa05032	1.85E-01	9.98E-01	GABRQ|0.00501338241236;GABRB3|0.00340058813788;PRKCB|0.00177249835023;PDE1A|0.00749425093223;OPRM1|0.00183500536956;GABRG2|10.5560632862;ADCY4|0.378929141628;GABRR1|16.5642387815;GABRA2|0.226879788829;GNAO1|4.3469394501;GNG13|1024;ADCY8|3.58010028371;ARRB1|0.476318999022;ADCY2|0.406126198178;PDE8B|18.8958825829;GNG3|45.8865679365;GNG10|0.148650889375	17	91	1047	7057	http://www.kegg.jp/kegg-bin/show_pathway?hsa05032/hsa:55879%09blue/hsa:2562%09blue/hsa:5579%09blue/hsa:5136%09blue/hsa:4988%09blue/hsa:2566%09red/hsa:196883%09blue/hsa:2569%09red/hsa:2555%09blue/hsa:2775%09red/hsa:51764%09red/hsa:114%09red/hsa:408%09blue/hsa:108%09blue/hsa:8622%09red/hsa:2785%09red/hsa:2790%09blue
Arginine biosynthesis	hsa00220	1.91E-01	1.00E+00	OTC|16.795466938;NAGS|13.5479249978;NOS3|2.67585510957;GPT|8.69387890021;ARG2|2.92817139189	5	21	1047	7057	http://www.kegg.jp/kegg-bin/show_pathway?hsa00220/hsa:5009%09red/hsa:162417%09red/hsa:4846%09red/hsa:2875%09red/hsa:384%09red
Inflammatory mediator regulation of TRP channels	hsa04750	1.96E-01	1.00E+00	ASIC2|0.00560138768756;PLA2G4E|0.00209330754402;PRKCB|0.00177249835023;TRPM8|2.21913894414;HRH1|0.00203606593914;TRPV3|4.40762046351;NTRK1|2.82842712475;ADCY4|0.378929141628;PLCG2|0.417543959714;ASIC1|9.12610972695;ASIC3|6.36429187004;IGF1|5.35171021914;SRC|0.493116352247;HTR2B|233.940851259;ITPR2|0.327598350965;ADCY8|3.58010028371;ADCY2|0.406126198178;PPP1CB|0.216134307827	18	98	1047	7057	http://www.kegg.jp/kegg-bin/show_pathway?hsa04750/hsa:40%09blue/hsa:123745%09blue/hsa:5579%09blue/hsa:79054%09red/hsa:3269%09blue/hsa:162514%09red/hsa:4914%09red/hsa:196883%09blue/hsa:5336%09blue/hsa:41%09red/hsa:9311%09red/hsa:3479%09red/hsa:6714%09blue/hsa:3357%09red/hsa:3709%09blue/hsa:114%09red/hsa:108%09blue/hsa:5500%09blue
Collecting duct acid secretion	hsa04966	2.02E-01	1.00E+00	ATP4A|0.00118573719179;ATP6V1G3|0.0009765625;SLC4A1|9.12610972695;ATP6V1G2|3.89061978965;ATP6V0A4|16.4498212265;ATP6V1C2|326.287520594	6	27	1047	7057	http://www.kegg.jp/kegg-bin/show_pathway?hsa04966/hsa:495%09blue/hsa:127124%09blue/hsa:6521%09red/hsa:534%09red/hsa:50617%09red/hsa:245973%09red
Cholinergic synapse	hsa04725	2.04E-01	1.00E+00	SLC18A3|0.00352050961957;PRKCB|0.00177249835023;CHRNB2|2.26576777059;CREB3L3|0.00571908474979;ADCY4|0.378929141628;CACNA1F|16.0;ACHE|6.49801917085;CHRM4|37.5307183754;GNAO1|4.3469394501;FOS|0.151774360549;ITPR2|0.327598350965;GNG13|1024;ADCY8|3.58010028371;CREB3L4|3.34035167771;BCL2|0.196146024474;ADCY2|0.406126198178;GNG3|45.8865679365;MAP2K1|3.03143313302;GNG10|0.148650889375;CREB3|2.58470566127	20	111	1047	7057	http://www.kegg.jp/kegg-bin/show_pathway?hsa04725/hsa:6572%09blue/hsa:5579%09blue/hsa:1141%09red/hsa:84699%09blue/hsa:196883%09blue/hsa:778%09red/hsa:43%09red/hsa:1132%09red/hsa:2775%09red/hsa:2353%09blue/hsa:3709%09blue/hsa:51764%09red/hsa:114%09red/hsa:148327%09red/hsa:596%09blue/hsa:108%09blue/hsa:2785%09red/hsa:5604%09red/hsa:2790%09blue/hsa:10488%09red
Apoptosis - multiple species	hsa04215	2.09E-01	1.00E+00	FADD|3.50642288526;BCL2|0.196146024474;BIRC3|0.309926924985;APAF1|0.25881623096;BCL2L1|0.463294030945;BIRC6|0.309926924985;CASP3|0.233258247884	7	33	1047	7057	http://www.kegg.jp/kegg-bin/show_pathway?hsa04215/hsa:8772%09red/hsa:596%09blue/hsa:330%09blue/hsa:317%09blue/hsa:598%09blue/hsa:57448%09blue/hsa:836%09blue
Taurine and hypotaurine metabolism	hsa00430	2.16E-01	1.00E+00	GADL1|0.00114534663011;GGT1|2.80888975148;GGT5|3.24900958542	3	11	1047	7057	http://www.kegg.jp/kegg-bin/show_pathway?hsa00430/hsa:339896%09blue/hsa:2678%09red/hsa:2687%09red
Serotonergic synapse	hsa04726	2.16E-01	1.00E+00	GABRB3|0.00340058813788;ALOX15B|10.8528346196;PLA2G4E|0.00209330754402;PRKCB|0.00177249835023;DDC|0.00436440288309;HTR7|2.44528055538;CACNA1F|16.0;SLC18A1|10.1964850186;HTR1D|2.7894873327;ALOX5|12.1257325321;GNAO1|4.3469394501;HTR2B|233.940851259;ITPR2|0.327598350965;GNG13|1024;TRPC1|0.275476278969;CASP3|0.233258247884;GNG3|45.8865679365;MAP2K1|3.03143313302;GNG10|0.148650889375;SLC18A2|150.12287…	20	112	1047	7057	http://www.kegg.jp/kegg-bin/show_pathway?hsa04726/hsa:2562%09blue/hsa:247%09red/hsa:123745%09blue/hsa:5579%09blue/hsa:1644%09blue/hsa:3363%09red/hsa:778%09red/hsa:6570%09red/hsa:3352%09red/hsa:240%09red/hsa:2775%09red/hsa:3357%09red/hsa:3709%09blue/hsa:51764%09red/hsa:7220%09blue/hsa:836%09blue/hsa:2785%09red/hsa:5604%09red/hsa:2790%09blue/hsa:6571%09red
Amoebiasis	hsa05146	2.21E-01	1.00E+00	IL1R2|0.00202200180438;PRKCB|0.00177249835023;CD14|9.38267959386;C8A|70.0347968807;IL12A|18.8958825829;COL4A4|0.423372656181;GNA14|23.9175879782;COL4A6|0.176776695297;LAMB3|3.45814892523;COL4A5|0.246558176123;CASP3|0.233258247884;LAMA3|10.1260527518;TGFB3|4.92457765338;LAMC2|3.81055199218;COL4A1|0.435275281648;ARG2|2.92817139189;COL1A1|3.34035167771;COL3A1|0.426317445884	18	100	1047	7057	http://www.kegg.jp/kegg-bin/show_pathway?hsa05146/hsa:7850%09blue/hsa:5579%09blue/hsa:929%09red/hsa:731%09red/hsa:3592%09red/hsa:1286%09blue/hsa:9630%09red/hsa:1288%09blue/hsa:3914%09red/hsa:1287%09blue/hsa:836%09blue/hsa:3909%09red/hsa:7043%09red/hsa:3918%09red/hsa:1282%09blue/hsa:384%09red/hsa:1277%09red/hsa:1281%09blue
Steroid hormone biosynthesis	hsa00140	2.34E-01	1.00E+00	UGT1A6|0.0076517210749;CYP1A1|0.00548611279585;UGT1A10|0.0009765625;CYP1A2|1024;CYP21A2|26.7228134217;AKR1C4|29.8570557292;HSD17B1|6.45313407378;STS|21.7056692392;HSD11B2|0.184283652161;CYP7B1|0.236514411681;SRD5A1|3.34035167771	11	58	1047	7057	http://www.kegg.jp/kegg-bin/show_pathway?hsa00140/hsa:54578%09blue/hsa:1543%09blue/hsa:54575%09blue/hsa:1544%09red/hsa:1589%09red/hsa:1109%09red/hsa:3292%09red/hsa:412%09red/hsa:3291%09blue/hsa:9420%09blue/hsa:6715%09red
Lysine degradation	hsa00310	2.35E-01	1.00E+00	PIPOX|0.00436440288309;SETD1A|3.91768119035;KMT2C|0.384218795322;EHHADH|0.174342958294;SUV39H2|0.31864015683;ALDH2|2.21913894414;PLOD2|5.38893430746;ALDH7A1|2.18858740252;ACAT2|2.31337636781;PHYKPL|79.3412927961	10	52	1047	7057	http://www.kegg.jp/kegg-bin/show_pathway?hsa00310/hsa:51268%09blue/hsa:9739%09red/hsa:58508%09blue/hsa:1962%09blue/hsa:79723%09blue/hsa:217%09red/hsa:5352%09red/hsa:501%09red/hsa:39%09red/hsa:85007%09red
Selenocompound metabolism	hsa00450	2.38E-01	1.00E+00	PSTK|3.7842305869;TXNRD2|2.62078680772;CTH|0.185565446329;PAPSS2|4.19886673449	4	17	1047	7057	http://www.kegg.jp/kegg-bin/show_pathway?hsa00450/hsa:118672%09red/hsa:10587%09red/hsa:1491%09blue/hsa:9060%09red
Ras signaling pathway	hsa04014	2.40E-01	1.00E+00	PLA2G4E|0.00209330754402;PRKCB|0.00177249835023;PLA2G2F|0.00135264596495;RASAL3|0.0011217757373;RAC2|6.68070335543;FGF23|8.57418770029;CSF1|3.6807506025;PLCG2|0.417543959714;HTR7|2.44528055538;RASSF5|3.50642288526;ZAP70|18.7653591877;RIN1|2.25011696938;FGFR4|0.0009765625;RASAL1|53.0764509321;FGF21|5.38893430746;FGF4|0.0009765625;IGF1|5.35171021914;SHC3|0.353553390593;RASA4|0.476318999022;RAPGEF5|…	38	228	1047	7057	http://www.kegg.jp/kegg-bin/show_pathway?hsa04014/hsa:123745%09blue/hsa:5579%09blue/hsa:64600%09blue/hsa:64926%09blue/hsa:5880%09red/hsa:8074%09red/hsa:1435%09red/hsa:5336%09blue/hsa:3363%09red/hsa:83593%09red/hsa:7535%09red/hsa:9610%09red/hsa:2264%09blue/hsa:8437%09red/hsa:26291%09red/hsa:2249%09blue/hsa:3479%09red/hsa:53358%09blue/hsa:10156%09blue/hsa:9771%09blue/hsa:115727%09red/hsa:2549%09blu…
Tyrosine metabolism	hsa00350	2.56E-01	1.00E+00	ALDH3A1|0.0016085762056;DDC|0.00436440288309;DBH|6.68070335543;TYRP1|652.575041187;AOC3|2.04202425141;ADH7|0.00604517575602;AOC2|7.41270449512	7	35	1047	7057	http://www.kegg.jp/kegg-bin/show_pathway?hsa00350/hsa:218%09blue/hsa:1644%09blue/hsa:1621%09red/hsa:7306%09red/hsa:8639%09red/hsa:131%09blue/hsa:314%09red
cAMP signaling pathway	hsa04024	2.69E-01	1.00E+00	ATP2B3|0.00497875245047;OXTR|0.0109722255917;CREB3L3|0.00571908474979;RAC2|6.68070335543;ADCY4|0.378929141628;AMH|0.00189971669416;GRIN2C|4.59479341999;NFATC1|0.0009765625;ATP1B4|0.00198038960896;CACNA1F|16.0;GRIN2D|7.361501205;HTR1D|2.7894873327;CNGA3|1024;PPP1R1B|0.238159499511;F2R|0.334481888697;GRIA3|0.295248165357;FOS|0.151774360549;GRIN3B|17.3877578004;ADCY8|3.58010028371;CREB3L4|3.34035167…	33	199	1047	7057	http://www.kegg.jp/kegg-bin/show_pathway?hsa04024/hsa:492%09blue/hsa:5021%09blue/hsa:84699%09blue/hsa:5880%09red/hsa:196883%09blue/hsa:268%09blue/hsa:2905%09red/hsa:4772%09blue/hsa:23439%09blue/hsa:778%09red/hsa:2906%09red/hsa:3352%09red/hsa:1261%09red/hsa:84152%09blue/hsa:2149%09blue/hsa:2892%09blue/hsa:2353%09blue/hsa:116444%09red/hsa:114%09red/hsa:148327%09red/hsa:3991%09red/hsa:5465%09red/hsa…
Lysine biosynthesis	hsa00300	2.75E-01	1.00E+00	ALDH7A1|2.18858740252	1	2	1047	7057	http://www.kegg.jp/kegg-bin/show_pathway?hsa00300/hsa:501%09red
Lysosome	hsa04142	2.76E-01	1.00E+00	CTSF|0.00708999340092;LAMP3|16.795466938;PSAPL1|3.48220225318;CTSW|66.2569551258;TPP1|3.29436406907;SLC17A5|0.343885454535;GALNS|2.46228882669;SMPD1|2.25011696938;MFSD8|0.211686328091;GAA|2.31337636781;AP4E1|0.223756267732;NAPSA|54.1916999912;ATP6V0A4|16.4498212265;AP3D1|0.463294030945;GGA1|3.05251841792;NAGA|16.4498212265;ARSB|9.57982963695;CD164|0.285190928967;GNPTG|3.97236998175;AP1G2|7.061623…	21	123	1047	7057	http://www.kegg.jp/kegg-bin/show_pathway?hsa04142/hsa:8722%09blue/hsa:27074%09red/hsa:768239%09red/hsa:1521%09red/hsa:1200%09red/hsa:26503%09blue/hsa:2588%09red/hsa:6609%09red/hsa:256471%09blue/hsa:2548%09red/hsa:23431%09blue/hsa:9476%09red/hsa:50617%09red/hsa:8943%09blue/hsa:26088%09red/hsa:4668%09red/hsa:411%09red/hsa:8763%09blue/hsa:84572%09red/hsa:8906%09red/hsa:1213%09blue
DNA replication	hsa03030	2.80E-01	1.00E+00	DNA2|0.216134307827;PRIM2|0.244855074397;RFC1|0.307786103336;MCM4|0.31425334363;RPA1|0.426317445884;MCM2|0.414659772907;PCNA|0.122427537198	7	36	1047	7057	http://www.kegg.jp/kegg-bin/show_pathway?hsa03030/hsa:1763%09blue/hsa:5558%09blue/hsa:5981%09blue/hsa:4173%09blue/hsa:6117%09blue/hsa:4171%09blue/hsa:5111%09blue
Legionellosis	hsa05134	2.94E-01	1.00E+00	CXCL2|0.00312917920933;CR1|0.219151430329;CD14|9.38267959386;NAIP|1024;IL12A|18.8958825829;PYCARD|7.6741129546;APAF1|0.25881623096;CASP3|0.233258247884;TLR5|57.2816045394;HSPD1|0.320856474391	10	55	1047	7057	http://www.kegg.jp/kegg-bin/show_pathway?hsa05134/hsa:2920%09blue/hsa:1378%09blue/hsa:929%09red/hsa:4671%09red/hsa:3592%09red/hsa:29108%09red/hsa:317%09blue/hsa:836%09blue/hsa:7100%09red/hsa:3329%09blue
Circadian rhythm	hsa04710	3.08E-01	1.00E+00	PRKAG2|7.31065160184;BHLHE40|2.26576777059;CRY1|0.332171453524;NPAS2|25.6342360829;BTRC|0.403320879611;CLOCK|0.253489869948	6	31	1047	7057	http://www.kegg.jp/kegg-bin/show_pathway?hsa04710/hsa:51422%09red/hsa:8553%09red/hsa:1407%09blue/hsa:4862%09red/hsa:8945%09blue/hsa:9575%09blue
Glycosaminoglycan degradation	hsa00531	3.08E-01	1.00E+00	HYAL4|8.81524092701;HPSE|20.534814361;GALNS|2.46228882669;ARSB|9.57982963695	4	19	1047	7057	http://www.kegg.jp/kegg-bin/show_pathway?hsa00531/hsa:23553%09red/hsa:10855%09red/hsa:2588%09red/hsa:411%09red
Arachidonic acid metabolism	hsa00590	3.09E-01	1.00E+00	ALOX15B|10.8528346196;PLA2G4E|0.00209330754402;PLA2G2F|0.00135264596495;GGT1|2.80888975148;GGT5|3.24900958542;GPX2|19.1596592739;ALOX5|12.1257325321;PLB1|3.31727818326;GPX3|16.6794521735;PTGIS|0.406126198178;PTGES3|0.13212725507	11	62	1047	7057	http://www.kegg.jp/kegg-bin/show_pathway?hsa00590/hsa:247%09red/hsa:123745%09blue/hsa:64600%09blue/hsa:2678%09red/hsa:2687%09red/hsa:2877%09red/hsa:240%09red/hsa:151056%09red/hsa:2878%09red/hsa:5740%09blue/hsa:10728%09blue
Vascular smooth muscle contraction	hsa04270	3.22E-01	1.00E+00	PLA2G4E|0.00209330754402;PRKCB|0.00177249835023;RAMP3|0.00150085466923;PLA2G2F|0.00135264596495;AGTR1|0.00184776884126;ADCY4|0.378929141628;MRVI1|0.241484082231;CACNA1F|16.0;ADRA1D|67.6491545959;KCNMB3|54.948187932;ITPR2|0.327598350965;ADCY8|3.58010028371;ROCK2|0.267943365634;ADCY2|0.406126198178;EDNRA|0.0908732823325;CALCRL|0.115023456328;PPP1R14A|6.45313407378;ARHGEF12|0.327598350965;MAP2K1|3.0…	20	120	1047	7057	http://www.kegg.jp/kegg-bin/show_pathway?hsa04270/hsa:123745%09blue/hsa:5579%09blue/hsa:10268%09blue/hsa:64600%09blue/hsa:185%09blue/hsa:196883%09blue/hsa:10335%09blue/hsa:778%09red/hsa:146%09red/hsa:27094%09red/hsa:3709%09blue/hsa:114%09red/hsa:9475%09blue/hsa:108%09blue/hsa:1909%09blue/hsa:10203%09blue/hsa:94274%09red/hsa:23365%09blue/hsa:5604%09red/hsa:5500%09blue
Cell adhesion molecules (CAMs)	hsa04514	3.25E-01	1.00E+00	MPZ|7.51618199371;L1CAM|2.67585510957;CD4|10.7778686149;CNTN2|0.411795508634;CD86|35.5062231062;CLDN9|27.2843165366;SELL|84.4485062895;LRRC4|5.35171021914;CNTNAP1|7.62110398435;CD80|109.896375864;CADM3|0.243163736853;CD274|7.51618199371;VTCN1|2.69446715373;ITGB7|15.1369223476;ITGB8|0.159320078415;NLGN1|0.279321784518;CLDN6|0.320856474391;OCLN|0.36349312933;ITGA9|0.320856474391;CLDN20|17.387757800…	24	146	1047	7057	http://www.kegg.jp/kegg-bin/show_pathway?hsa04514/hsa:4359%09red/hsa:3897%09red/hsa:920%09red/hsa:6900%09blue/hsa:942%09red/hsa:9080%09red/hsa:6402%09red/hsa:64101%09red/hsa:8506%09red/hsa:941%09red/hsa:57863%09blue/hsa:29126%09red/hsa:79679%09red/hsa:3695%09red/hsa:3696%09blue/hsa:22871%09blue/hsa:9074%09blue/hsa:100506658%09blue/hsa:3680%09blue/hsa:49861%09red/hsa:1000%09blue/hsa:53842%09red/hs…
Retrograde endocannabinoid signaling	hsa04723	3.25E-01	1.00E+00	GABRQ|0.00501338241236;GABRB3|0.00340058813788;PRKCB|0.00177249835023;GABRG2|10.5560632862;ADCY4|0.378929141628;CACNA1F|16.0;GABRR1|16.5642387815;GABRA2|0.226879788829;CNR1|0.239816029831;GNAO1|4.3469394501;GRIA3|0.295248165357;ITPR2|0.327598350965;GNG13|1024;ADCY8|3.58010028371;ADCY2|0.406126198178;GNG3|45.8865679365;GNG10|0.148650889375	17	101	1047	7057	http://www.kegg.jp/kegg-bin/show_pathway?hsa04723/hsa:55879%09blue/hsa:2562%09blue/hsa:5579%09blue/hsa:2566%09red/hsa:196883%09blue/hsa:778%09red/hsa:2569%09red/hsa:2555%09blue/hsa:1268%09blue/hsa:2775%09red/hsa:2892%09blue/hsa:3709%09blue/hsa:51764%09red/hsa:114%09red/hsa:108%09blue/hsa:2785%09red/hsa:2790%09blue
Staphylococcus aureus infection	hsa05150	3.35E-01	1.00E+00	FCAR|1024;C5AR1|0.00287943206502;C1QB|0.0009765625;C2|8.57418770029;MASP1|4.99332219561;FCGR1A|91.773135873;CFB|51.2684721657;KRT10|16.5642387815;DSG1|3.34035167771;MASP2|694.581415653	10	57	1047	7057	http://www.kegg.jp/kegg-bin/show_pathway?hsa05150/hsa:2204%09red/hsa:728%09blue/hsa:713%09blue/hsa:717%09red/hsa:5648%09red/hsa:2209%09red/hsa:629%09red/hsa:3858%09red/hsa:1828%09red/hsa:10747%09red
Ribosome biogenesis in eukaryotes	hsa03008	3.38E-01	1.00E+00	REXO1|0.012090351512;RPP40|0.327598350965;POP4|0.307786103336;PWP2|3.11665831864;WDR36|0.18049114944;NMD3|0.0824692444233;WDR43|0.320856474391;FCF1|0.262429170906;AK6|7.7812395793;WDR3|0.368567304323;XRN2|0.353553390593;CSNK2B|2.42838976879;NOP58|0.166085726762;XPO1|0.179244406002;RAN|0.271683715632	15	89	1047	7057	http://www.kegg.jp/kegg-bin/show_pathway?hsa03008/hsa:57455%09blue/hsa:10799%09blue/hsa:10775%09blue/hsa:102724159%09red/hsa:134430%09blue/hsa:51068%09blue/hsa:23160%09blue/hsa:51077%09blue/hsa:102157402%09red/hsa:10885%09blue/hsa:22803%09blue/hsa:1460%09red/hsa:51602%09blue/hsa:7514%09blue/hsa:5901%09blue
Salivary secretion	hsa04970	3.38E-01	1.00E+00	AQP5|0.00347204172331;ATP2B3|0.00497875245047;PRKCB|0.00177249835023;ADCY4|0.378929141628;ATP1B4|0.00198038960896;KCNN4|1024;ADRA1D|67.6491545959;CD38|6.23331663728;LYZ|12.0419739793;TRPV6|21.2589730255;ITPR2|0.327598350965;ADCY8|3.58010028371;ADCY2|0.406126198178;ATP2B4|0.400534938795;ATP1B3|0.271683715632	15	89	1047	7057	http://www.kegg.jp/kegg-bin/show_pathway?hsa04970/hsa:362%09blue/hsa:492%09blue/hsa:5579%09blue/hsa:196883%09blue/hsa:23439%09blue/hsa:3783%09red/hsa:146%09red/hsa:952%09red/hsa:4069%09red/hsa:55503%09red/hsa:3709%09blue/hsa:114%09red/hsa:108%09blue/hsa:493%09blue/hsa:483%09blue
Maturity onset diabetes of the young	hsa04950	3.40E-01	1.00E+00	ONECUT1|0.00501338241236;PAX6|9.57982963695;RFX6|0.0009765625;IAPP|1024;HNF1A|183.546271746	5	26	1047	7057	http://www.kegg.jp/kegg-bin/show_pathway?hsa04950/hsa:3175%09blue/hsa:5080%09red/hsa:222546%09blue/hsa:3375%09red/hsa:6927%09red
Amyotrophic lateral sclerosis (ALS)	hsa05014	3.42E-01	1.00E+00	NEFL|0.00163103109263;GRIN2C|4.59479341999;GRIN2D|7.361501205;BCL2|0.196146024474;PPP3CB|0.228457862557;APAF1|0.25881623096;BCL2L1|0.463294030945;CASP3|0.233258247884;BAD|3.89061978965	9	51	1047	7057	http://www.kegg.jp/kegg-bin/show_pathway?hsa05014/hsa:4747%09blue/hsa:2905%09red/hsa:2906%09red/hsa:596%09blue/hsa:5532%09blue/hsa:317%09blue/hsa:598%09blue/hsa:836%09blue/hsa:572%09red
Glycosaminoglycan biosynthesis - chondroitin sulfate / dermatan sulfate	hsa00532	3.44E-01	1.00E+00	CHST12|2.12874036491;CHSY3|3.27160823423;CHST15|0.38156480224;CHST13|59.7141114584	4	20	1047	7057	http://www.kegg.jp/kegg-bin/show_pathway?hsa00532/hsa:55501%09red/hsa:337876%09red/hsa:51363%09blue/hsa:166012%09red
Ether lipid metabolism	hsa00565	3.49E-01	1.00E+00	GAL3ST1|0.00243814560332;PLA2G4E|0.00209330754402;PLA2G2F|0.00135264596495;TMEM86B|0.0009765625;PLB1|3.31727818326;CHPT1|0.293208737308;PAFAH1B2|0.273573425315;PLPP1|6.58872813814	8	45	1047	7057	http://www.kegg.jp/kegg-bin/show_pathway?hsa00565/hsa:9514%09blue/hsa:123745%09blue/hsa:64600%09blue/hsa:255043%09blue/hsa:151056%09red/hsa:56994%09blue/hsa:5049%09blue/hsa:8611%09red
Platelet activation	hsa04611	3.50E-01	1.00E+00	PLA2G4E|0.00209330754402;APBB1IP|0.00379943338833;ADCY4|0.378929141628;PLCG2|0.417543959714;GP1BA|28.4429657973;NOS3|2.67585510957;F2R|0.334481888697;SRC|0.493116352247;ITPR2|0.327598350965;ADCY8|3.58010028371;FERMT3|69.5510312017;RAP1A|0.31864015683;RASGRP1|95.0095085203;ROCK2|0.267943365634;ADCY2|0.406126198178;GP9|36.00187151;ARHGEF12|0.327598350965;PPP1CB|0.216134307827;COL1A1|3.34035167771;C…	20	122	1047	7057	http://www.kegg.jp/kegg-bin/show_pathway?hsa04611/hsa:123745%09blue/hsa:54518%09blue/hsa:196883%09blue/hsa:5336%09blue/hsa:2811%09red/hsa:4846%09red/hsa:2149%09blue/hsa:6714%09blue/hsa:3709%09blue/hsa:114%09red/hsa:83706%09red/hsa:5906%09blue/hsa:10125%09red/hsa:9475%09blue/hsa:108%09blue/hsa:2815%09red/hsa:23365%09blue/hsa:5500%09blue/hsa:1277%09red/hsa:1281%09blue
RNA degradation	hsa03018	3.52E-01	1.00E+00	PABPC1L|4.16986304336;CNOT3|2.39495740924;CNOT6L|0.291183396617;CNOT6|0.203063099089;ENO3|2.07052984768;DHX36|0.246558176123;DIS3|0.211686328091;TTC37|0.305660069423;EXOSC4|3.75809099686;EXOSC3|5.89707686916;XRN2|0.353553390593;PABPC1|0.386891248386;HSPD1|0.320856474391	13	77	1047	7057	http://www.kegg.jp/kegg-bin/show_pathway?hsa03018/hsa:80336%09red/hsa:4849%09red/hsa:246175%09blue/hsa:57472%09blue/hsa:2027%09red/hsa:170506%09blue/hsa:22894%09blue/hsa:9652%09blue/hsa:54512%09red/hsa:51010%09red/hsa:22803%09blue/hsa:26986%09blue/hsa:3329%09blue
Mineral absorption	hsa04978	3.64E-01	1.00E+00	SLC34A2|14.72300241;ATP1B4|0.00198038960896;SLC5A1|3.50642288526;S100G|3.65532580092;TRPV6|21.2589730255;STEAP2|0.341510064189;ATP7A|0.301451956923;HEPH|0.269807059126;ATP1B3|0.271683715632	9	52	1047	7057	http://www.kegg.jp/kegg-bin/show_pathway?hsa04978/hsa:10568%09red/hsa:23439%09blue/hsa:6523%09red/hsa:795%09red/hsa:55503%09red/hsa:261729%09blue/hsa:538%09blue/hsa:9843%09blue/hsa:483%09blue
Adrenergic signaling in cardiomyocytes	hsa04261	3.64E-01	1.00E+00	ATP2B3|0.00497875245047;AGTR1|0.00184776884126;CREB3L3|0.00571908474979;ADCY4|0.378929141628;ATP1B4|0.00198038960896;CACNG5|0.0009765625;CACNA1F|16.0;ADRA1D|67.6491545959;MYL3|0.0009765625;MYH7|4.65893434587;MYH6|17.7531115531;ADCY8|3.58010028371;CREB3L4|3.34035167771;CACNB2|3.89061978965;BCL2|0.196146024474;PPP2R2A|0.343885454535;ADCY2|0.406126198178;ATP2B4|0.400534938795;PPP2R5E|0.231647015473;…	24	149	1047	7057	http://www.kegg.jp/kegg-bin/show_pathway?hsa04261/hsa:492%09blue/hsa:185%09blue/hsa:84699%09blue/hsa:196883%09blue/hsa:23439%09blue/hsa:27091%09blue/hsa:778%09red/hsa:146%09red/hsa:4634%09blue/hsa:4625%09red/hsa:4624%09red/hsa:114%09red/hsa:148327%09red/hsa:783%09red/hsa:596%09blue/hsa:5520%09blue/hsa:108%09blue/hsa:493%09blue/hsa:5529%09blue/hsa:483%09blue/hsa:5528%09red/hsa:5350%09red/hsa:10488…
Wnt signaling pathway	hsa04310	3.71E-01	1.00E+00	PRKCB|0.00177249835023;RAC2|6.68070335543;SOST|9.25350547124;NFATC1|0.0009765625;SIAH1|0.312082637225;WNT8B|28.4429657973;FOSL1|66.7178086938;FZD9|23.5883074767;PRICKLE2|0.366021423986;WNT2B|12.9960383417;WNT10B|0.271683715632;AXIN2|0.279321784518;BTRC|0.403320879611;WIF1|0.253489869948;PPP3CB|0.228457862557;ROCK2|0.267943365634;APC2|46.5271205542;FZD3|0.26061644021;LEF1|0.371130892657;TBL1XR1|0.…	23	143	1047	7057	http://www.kegg.jp/kegg-bin/show_pathway?hsa04310/hsa:5579%09blue/hsa:5880%09red/hsa:50964%09red/hsa:4772%09blue/hsa:6477%09blue/hsa:7479%09red/hsa:8061%09red/hsa:8326%09red/hsa:166336%09blue/hsa:7482%09red/hsa:7480%09blue/hsa:8313%09blue/hsa:8945%09blue/hsa:11197%09blue/hsa:5532%09blue/hsa:9475%09blue/hsa:10297%09red/hsa:7976%09blue/hsa:51176%09blue/hsa:79718%09blue/hsa:894%09blue/hsa:1460%09red…
Ascorbate and aldarate metabolism	hsa00053	3.72E-01	1.00E+00	UGT1A6|0.0076517210749;UGT1A10|0.0009765625;ALDH2|2.21913894414;UGDH|0.293208737308;ALDH7A1|2.18858740252	5	27	1047	7057	http://www.kegg.jp/kegg-bin/show_pathway?hsa00053/hsa:54578%09blue/hsa:54575%09blue/hsa:217%09red/hsa:7358%09blue/hsa:501%09red
Purine metabolism	hsa00230	3.75E-01	1.00E+00	AK9|5.54043787244;PDE1A|0.00749425093223;AMPD1|0.00272410872334;ADCY4|0.378929141628;NME5|0.0009765625;PDE6A|17.3877578004;TWISTNB|7.21000370089;NT5M|5.02805349809;PDE6C|75.5835303315;IMPDH1|2.98969849727;ENTPD8|178.527189293;ADCY8|3.58010028371;NT5E|6.32033049491;AK5|2.41161565538;NME7|0.214641359109;NT5C|3.01049349482;PRIM2|0.244855074397;ENTPD3|5.27803164309;ADCY2|0.406126198178;PDE8B|18.89588…	28	176	1047	7057	http://www.kegg.jp/kegg-bin/show_pathway?hsa00230/hsa:221264%09red/hsa:5136%09blue/hsa:270%09blue/hsa:196883%09blue/hsa:8382%09blue/hsa:5145%09red/hsa:221830%09red/hsa:56953%09red/hsa:5146%09red/hsa:3614%09red/hsa:377841%09red/hsa:114%09red/hsa:4907%09red/hsa:26289%09red/hsa:29922%09blue/hsa:30833%09red/hsa:5558%09blue/hsa:956%09red/hsa:108%09blue/hsa:8622%09red/hsa:102157402%09red/hsa:132%09blue…
MAPK signaling pathway	hsa04010	3.76E-01	1.00E+00	IL1R2|0.00202200180438;PLA2G4E|0.00209330754402;PRKCB|0.00177249835023;RAC2|6.68070335543;FGF23|8.57418770029;NTRK1|2.82842712475;NFATC1|0.0009765625;CACNG5|0.0009765625;FGFR4|0.0009765625;CD14|9.38267959386;CACNA1I|2.18858740252;PTPRR|3.29436406907;CACNA1F|16.0;FGF21|5.38893430746;FGF4|0.0009765625;PTPN7|11.4716419841;CACNA1G|0.453759577659;RASGRP4|50.2133822654;TRAF6|0.213158722942;FOS|0.151774…	40	255	1047	7057	http://www.kegg.jp/kegg-bin/show_pathway?hsa04010/hsa:7850%09blue/hsa:123745%09blue/hsa:5579%09blue/hsa:5880%09red/hsa:8074%09red/hsa:4914%09red/hsa:4772%09blue/hsa:27091%09blue/hsa:2264%09blue/hsa:929%09red/hsa:8911%09red/hsa:5801%09red/hsa:778%09red/hsa:26291%09red/hsa:2249%09blue/hsa:5778%09red/hsa:8913%09blue/hsa:115727%09red/hsa:7189%09blue/hsa:2353%09blue/hsa:783%09red/hsa:23118%09blue/hsa:…
Pyruvate metabolism	hsa00620	3.82E-01	1.00E+00	ACOT12|4.46914855229;ME1|0.16154410383;HAGHL|14.4200074018;ALDH2|2.21913894414;ALDH7A1|2.18858740252;MDH1|0.269807059126;ACAT2|2.31337636781	7	40	1047	7057	http://www.kegg.jp/kegg-bin/show_pathway?hsa00620/hsa:134526%09red/hsa:4199%09blue/hsa:84264%09red/hsa:217%09red/hsa:501%09red/hsa:4190%09blue/hsa:39%09red
Tryptophan metabolism	hsa00380	3.82E-01	1.00E+00	CYP1A1|0.00548611279585;DDC|0.00436440288309;CYP1A2|1024;EHHADH|0.174342958294;ALDH2|2.21913894414;ALDH7A1|2.18858740252;ACAT2|2.31337636781	7	40	1047	7057	http://www.kegg.jp/kegg-bin/show_pathway?hsa00380/hsa:1543%09blue/hsa:1644%09blue/hsa:1544%09red/hsa:1962%09blue/hsa:217%09red/hsa:501%09red/hsa:39%09red
Biotin metabolism	hsa00780	3.82E-01	1.00E+00	OXSM|0.351111218934	1	3	1047	7057	http://www.kegg.jp/kegg-bin/show_pathway?hsa00780/hsa:54995%09blue
Lipoic acid metabolism	hsa00785	3.82E-01	1.00E+00	LIAS|70.5219274161	1	3	1047	7057	http://www.kegg.jp/kegg-bin/show_pathway?hsa00785/hsa:11019%09red
Jak-STAT signaling pathway	hsa04630	3.96E-01	1.00E+00	CSF3|0.00680117627575;LEP|0.00675419711959;IL20|0.00382586053745;IL2RB|0.00340058813788;IL21R|0.00754637756973;IL15|0.0009765625;IL7|9.84915530676;IL15RA|8.0;IL12A|18.8958825829;IFNLR1|0.0009765625;STAT6|2.53151318794;CISH|4.92457765338;IL12RB2|10.8528346196;MPL|1024;BCL2|0.196146024474;SOS2|0.291183396617;IL27RA|0.287174588749;LIFR|0.17800627445;BCL2L1|0.463294030945;IL17D|3.60500185044;SPRED1|0…	25	158	1047	7057	http://www.kegg.jp/kegg-bin/show_pathway?hsa04630/hsa:1440%09blue/hsa:3952%09blue/hsa:50604%09blue/hsa:3560%09blue/hsa:50615%09blue/hsa:3600%09blue/hsa:3574%09red/hsa:3601%09red/hsa:3592%09red/hsa:163702%09blue/hsa:6778%09red/hsa:1154%09red/hsa:3595%09red/hsa:4352%09red/hsa:596%09blue/hsa:6655%09blue/hsa:9466%09blue/hsa:3977%09blue/hsa:598%09blue/hsa:53342%09red/hsa:161742%09blue/hsa:10401%09red/…
Oxytocin signaling pathway	hsa04921	3.96E-01	1.00E+00	PLA2G4E|0.00209330754402;PRKCB|0.00177249835023;OXTR|0.0109722255917;ADCY4|0.378929141628;NFATC1|0.0009765625;CACNG5|0.0009765625;CACNA1F|16.0;NOS3|2.67585510957;CD38|6.23331663728;CAMK1G|4.95883079976;OXT|23.7523771301;PRKAG2|7.31065160184;EEF2K|0.473028823363;GNAO1|4.3469394501;SRC|0.493116352247;FOS|0.151774360549;ITPR2|0.327598350965;ADCY8|3.58010028371;CACNB2|3.89061978965;PPP3CB|0.228457862…	25	158	1047	7057	http://www.kegg.jp/kegg-bin/show_pathway?hsa04921/hsa:123745%09blue/hsa:5579%09blue/hsa:5021%09blue/hsa:196883%09blue/hsa:4772%09blue/hsa:27091%09blue/hsa:778%09red/hsa:4846%09red/hsa:952%09red/hsa:57172%09red/hsa:5020%09red/hsa:51422%09red/hsa:101930123%09blue/hsa:2775%09red/hsa:6714%09blue/hsa:2353%09blue/hsa:3709%09blue/hsa:114%09red/hsa:783%09red/hsa:5532%09blue/hsa:9475%09blue/hsa:108%09blue…
Butanoate metabolism	hsa00650	4.03E-01	1.00E+00	ACSM5|7.46426393229;EHHADH|0.174342958294;ACSM4|248.999666538;ACSM3|333.143514993;ACAT2|2.31337636781	5	28	1047	7057	http://www.kegg.jp/kegg-bin/show_pathway?hsa00650/hsa:54988%09red/hsa:1962%09blue/hsa:341392%09red/hsa:6296%09red/hsa:39%09red
RNA transport	hsa03013	4.07E-01	1.00E+00	EIF2S2|0.0009765625;PABPC1L|4.16986304336;SUMO1|0.0009765625;NUP214|0.38156480224;RPP40|0.327598350965;RANGAP1|0.432268615654;POP4|0.307786103336;NUP160|0.376311686853;NUP43|0.283220971324;NMD3|0.0824692444233;EIF5B|0.329876977693;SRRM1|0.273573425315;NUP133|0.204475514639;NUP153|0.283220971324;FMR1|0.31425334363;NUP54|0.186856156079;NUP155|0.216134307827;RPP14|0.323088207659;NUP205|0.40053493879…	27	172	1047	7057	http://www.kegg.jp/kegg-bin/show_pathway?hsa03013/hsa:8894%09blue/hsa:80336%09red/hsa:7341%09blue/hsa:8021%09blue/hsa:10799%09blue/hsa:5905%09blue/hsa:10775%09blue/hsa:23279%09blue/hsa:348995%09blue/hsa:51068%09blue/hsa:9669%09blue/hsa:10250%09blue/hsa:55746%09blue/hsa:9972%09blue/hsa:2332%09blue/hsa:53371%09blue/hsa:9631%09blue/hsa:11102%09blue/hsa:23165%09blue/hsa:91181%09red/hsa:55110%09blue/h…
Melanogenesis	hsa04916	4.13E-01	1.00E+00	PRKCB|0.00177249835023;CREB3L3|0.00571908474979;TYRP1|652.575041187;ADCY4|0.378929141628;WNT8B|28.4429657973;FZD9|23.5883074767;GNAO1|4.3469394501;WNT2B|12.9960383417;WNT10B|0.271683715632;ADCY8|3.58010028371;CREB3L4|3.34035167771;ADCY2|0.406126198178;FZD3|0.26061644021;MAP2K1|3.03143313302;LEF1|0.371130892657;CREB3|2.58470566127	16	100	1047	7057	http://www.kegg.jp/kegg-bin/show_pathway?hsa04916/hsa:5579%09blue/hsa:84699%09blue/hsa:7306%09red/hsa:196883%09blue/hsa:7479%09red/hsa:8326%09red/hsa:2775%09red/hsa:7482%09red/hsa:7480%09blue/hsa:114%09red/hsa:148327%09red/hsa:108%09blue/hsa:7976%09blue/hsa:5604%09red/hsa:51176%09blue/hsa:10488%09red
Terpenoid backbone biosynthesis	hsa00900	4.16E-01	1.00E+00	IDI1|0.0009765625;PDSS2|0.0009765625;HMGCR|0.38156480224;ACAT2|2.31337636781	4	22	1047	7057	http://www.kegg.jp/kegg-bin/show_pathway?hsa00900/hsa:3422%09blue/hsa:57107%09blue/hsa:3156%09blue/hsa:39%09red
Arrhythmogenic right ventricular cardiomyopathy (ARVC)	hsa05412	4.18E-01	1.00E+00	SGCA|18.8958825829;CACNG5|0.0009765625;CACNA1F|16.0;ITGB7|15.1369223476;ITGA3|0.432268615654;ITGB8|0.159320078415;SGCD|0.295248165357;CACNB2|3.89061978965;ITGA9|0.320856474391;DSG2|0.266092545613;LEF1|0.371130892657;CDH2|0.378929141628	12	74	1047	7057	http://www.kegg.jp/kegg-bin/show_pathway?hsa05412/hsa:6442%09red/hsa:27091%09blue/hsa:778%09red/hsa:3695%09red/hsa:3675%09blue/hsa:3696%09blue/hsa:6444%09blue/hsa:783%09red/hsa:3680%09blue/hsa:1829%09blue/hsa:51176%09blue/hsa:1000%09blue
VEGF signaling pathway	hsa04370	4.19E-01	1.00E+00	PLA2G4E|0.00209330754402;PRKCB|0.00177249835023;RAC2|6.68070335543;PLCG2|0.417543959714;SPHK1|11.6317801386;NOS3|2.67585510957;SRC|0.493116352247;PPP3CB|0.228457862557;MAP2K1|3.03143313302;BAD|3.89061978965	10	61	1047	7057	http://www.kegg.jp/kegg-bin/show_pathway?hsa04370/hsa:123745%09blue/hsa:5579%09blue/hsa:5880%09red/hsa:5336%09blue/hsa:8877%09red/hsa:4846%09red/hsa:6714%09blue/hsa:5532%09blue/hsa:5604%09red/hsa:572%09red
Endocytosis	hsa04144	4.27E-01	1.00E+00	IL2RB|0.00340058813788;PSD2|0.00120228946616;GRK7|5.65685424949;PIP5KL1|2.7132086549;NTRK1|2.82842712475;WIPF3|6.72717132203;CYTH4|4.85677953758;FGFR4|0.0009765625;PSD|2.54912125464;F2R|0.334481888697;SRC|0.493116352247;CBLB|0.285190928967;TRAF6|0.213158722942;CBLC|3.53081198516;SNX32|2.4966610978;SH3GL2|0.251738887514;FOLR1|4.02782220023;PDCD6IP|0.244855074397;EPS15|0.316439148493;EEA1|0.3014519…	40	260	1047	7057	http://www.kegg.jp/kegg-bin/show_pathway?hsa04144/hsa:3560%09blue/hsa:84249%09blue/hsa:131890%09red/hsa:138429%09red/hsa:4914%09red/hsa:644150%09red/hsa:27128%09red/hsa:2264%09blue/hsa:5662%09red/hsa:2149%09blue/hsa:6714%09blue/hsa:868%09blue/hsa:7189%09blue/hsa:23624%09red/hsa:254122%09red/hsa:6456%09blue/hsa:2348%09red/hsa:10015%09blue/hsa:2060%09blue/hsa:8411%09blue/hsa:408%09blue/hsa:10565%09…
Hippo signaling pathway	hsa04390	4.31E-01	1.00E+00	AMH|0.00189971669416;BMPR1B|18.000935755;GLI2|0.281264621172;BMP8B|8.57418770029;WNT8B|28.4429657973;FZD9|23.5883074767;WNT2B|12.9960383417;WNT10B|0.271683715632;AXIN2|0.279321784518;MOB1B|0.171942727267;BTRC|0.403320879611;AMOT|0.312082637225;PPP2R2A|0.343885454535;ID2|0.285190928967;LATS1|0.329876977693;APC2|46.5271205542;FZD3|0.26061644021;TGFB3|4.92457765338;TGFBR1|0.210224103813;LEF1|0.37113…	24	154	1047	7057	http://www.kegg.jp/kegg-bin/show_pathway?hsa04390/hsa:268%09blue/hsa:658%09red/hsa:2736%09blue/hsa:656%09red/hsa:7479%09red/hsa:8326%09red/hsa:7482%09red/hsa:7480%09blue/hsa:8313%09blue/hsa:92597%09blue/hsa:8945%09blue/hsa:154796%09blue/hsa:5520%09blue/hsa:3398%09blue/hsa:9113%09blue/hsa:10297%09red/hsa:7976%09blue/hsa:7043%09red/hsa:7046%09blue/hsa:51176%09blue/hsa:894%09blue/hsa:10413%09blue/hs…
Hematopoietic cell lineage	hsa04640	4.33E-01	1.00E+00	CSF3|0.00680117627575;IL1R2|0.00202200180438;CD5|13.3614067109;CD4|10.7778686149;CSF1|3.6807506025;IL7|9.84915530676;CR1|0.219151430329;GP1BA|28.4429657973;CD14|9.38267959386;CD38|6.23331663728;ITGA3|0.432268615654;FCGR1A|91.773135873;GP9|36.00187151;TFRC|0.26061644021	14	88	1047	7057	http://www.kegg.jp/kegg-bin/show_pathway?hsa04640/hsa:1440%09blue/hsa:7850%09blue/hsa:921%09red/hsa:920%09red/hsa:1435%09red/hsa:3574%09red/hsa:1378%09blue/hsa:2811%09red/hsa:929%09red/hsa:952%09red/hsa:3675%09blue/hsa:2209%09red/hsa:2815%09red/hsa:7037%09blue
Thyroid cancer	hsa05216	4.35E-01	1.00E+00	NTRK1|2.82842712475;RXRG|0.18049114944;MAP2K1|3.03143313302;LEF1|0.371130892657;NCOA4|0.38156480224	5	29	1047	7057	http://www.kegg.jp/kegg-bin/show_pathway?hsa05216/hsa:4914%09red/hsa:6258%09blue/hsa:5604%09red/hsa:51176%09blue/hsa:8031%09blue
Signaling pathways regulating pluripotency of stem cells	hsa04550	4.48E-01	1.00E+00	ONECUT1|0.00501338241236;LEFTY2|42.2242531447;PAX6|9.57982963695;MYF5|0.00308609887447;FGFR4|0.0009765625;BMPR1B|18.000935755;WNT8B|28.4429657973;IGF1|5.35171021914;FZD9|23.5883074767;WNT2B|12.9960383417;WNT10B|0.271683715632;REST|0.163799175482;HNF1A|183.546271746;AXIN2|0.279321784518;ID2|0.285190928967;LIFR|0.17800627445;APC2|46.5271205542;SMARCAD1|0.283220971324;FZD3|0.26061644021;RIF1|0.21613…	22	142	1047	7057	http://www.kegg.jp/kegg-bin/show_pathway?hsa04550/hsa:3175%09blue/hsa:7044%09red/hsa:5080%09red/hsa:4617%09blue/hsa:2264%09blue/hsa:658%09red/hsa:7479%09red/hsa:3479%09red/hsa:8326%09red/hsa:7482%09red/hsa:7480%09blue/hsa:5978%09blue/hsa:6927%09red/hsa:8313%09blue/hsa:3398%09blue/hsa:3977%09blue/hsa:10297%09red/hsa:56916%09blue/hsa:7976%09blue/hsa:55183%09blue/hsa:5604%09red/hsa:2247%09red
Drug metabolism - cytochrome P450	hsa00982	4.49E-01	1.00E+00	UGT1A6|0.0076517210749;ALDH3A1|0.0016085762056;UGT1A10|0.0009765625;FMO1|2.09943336725;CYP1A2|1024;ADH7|0.00604517575602;FMO2|0.205897754317;GSTO2|13.1774562763;FMO5|6.14750072515;MGST2|18.37917368;GSTA4|0.31425334363	11	69	1047	7057	http://www.kegg.jp/kegg-bin/show_pathway?hsa00982/hsa:54578%09blue/hsa:218%09blue/hsa:54575%09blue/hsa:2326%09red/hsa:1544%09red/hsa:131%09blue/hsa:2327%09blue/hsa:119391%09red/hsa:2330%09red/hsa:4258%09red/hsa:2941%09blue
Prostate cancer	hsa05215	4.51E-01	1.00E+00	CREB3L3|0.00571908474979;AR|6.10503683584;IGF1|5.35171021914;FOXO1|2.37841423001;CCNE1|0.0877778047336;CREB3L4|3.34035167771;BCL2|0.196146024474;PDGFC|0.267943365634;SOS2|0.291183396617;MAP2K1|3.03143313302;LEF1|0.371130892657;BAD|3.89061978965;CREB3|2.58470566127;HSP90AA1|0.336808394216	14	89	1047	7057	http://www.kegg.jp/kegg-bin/show_pathway?hsa05215/hsa:84699%09blue/hsa:367%09red/hsa:3479%09red/hsa:2308%09red/hsa:898%09blue/hsa:148327%09red/hsa:596%09blue/hsa:56034%09blue/hsa:6655%09blue/hsa:5604%09red/hsa:51176%09blue/hsa:572%09red/hsa:10488%09red/hsa:3320%09blue
Proximal tubule bicarbonate reclamation	hsa04964	4.52E-01	1.00E+00	SLC38A3|0.00140034692189;ATP1B4|0.00198038960896;ATP1B3|0.271683715632;MDH1|0.269807059126	4	23	1047	7057	http://www.kegg.jp/kegg-bin/show_pathway?hsa04964/hsa:10991%09blue/hsa:23439%09blue/hsa:483%09blue/hsa:4190%09blue
Non-small cell lung cancer	hsa05223	4.54E-01	1.00E+00	PRKCB|0.00177249835023;CDKN2A|0.00335377123608;PLCG2|0.417543959714;RASSF5|3.50642288526;ALK|21.5557372299;SOS2|0.291183396617;RXRG|0.18049114944;MAP2K1|3.03143313302;BAD|3.89061978965	9	56	1047	7057	http://www.kegg.jp/kegg-bin/show_pathway?hsa05223/hsa:5579%09blue/hsa:1029%09blue/hsa:5336%09blue/hsa:83593%09red/hsa:238%09red/hsa:6655%09blue/hsa:6258%09blue/hsa:5604%09red/hsa:572%09red
Taste transduction	hsa04742	4.63E-01	1.00E+00	ASIC2|0.00560138768756;PDE1A|0.00749425093223;SCN3A|0.00206448836047;GRM4|10.6294865128;ADCY4|0.378929141628;SCNN1A|3.22656703689;SCNN1B|8.75434961009;HTR1D|2.7894873327;TAS1R3|7.01284577053;GABRA2|0.226879788829;P2RX2|2.26576777059;GNG13|1024;ADCY8|3.58010028371	13	83	1047	7057	http://www.kegg.jp/kegg-bin/show_pathway?hsa04742/hsa:40%09blue/hsa:5136%09blue/hsa:6328%09blue/hsa:2914%09red/hsa:196883%09blue/hsa:6337%09red/hsa:6338%09red/hsa:3352%09red/hsa:83756%09red/hsa:2555%09blue/hsa:22953%09red/hsa:51764%09red/hsa:114%09red
Rap1 signaling pathway	hsa04015	4.76E-01	1.00E+00	PRKCB|0.00177249835023;APBB1IP|0.00379943338833;RAC2|6.68070335543;FGF23|8.57418770029;CSF1|3.6807506025;ADCY4|0.378929141628;RASSF5|3.50642288526;FGFR4|0.0009765625;FGF21|5.38893430746;FGF4|0.0009765625;IGF1|5.35171021914;PFN4|16.0;FARP2|3.63007662127;LPAR5|47.8351759563;CNR1|0.239816029831;RAPGEF5|0.38958228983;GNAO1|4.3469394501;F2R|0.334481888697;SRC|0.493116352247;MAGI2|0.435275281648;ADCY8|…	32	211	1047	7057	http://www.kegg.jp/kegg-bin/show_pathway?hsa04015/hsa:5579%09blue/hsa:54518%09blue/hsa:5880%09red/hsa:8074%09red/hsa:1435%09red/hsa:196883%09blue/hsa:83593%09red/hsa:2264%09blue/hsa:26291%09red/hsa:2249%09blue/hsa:3479%09red/hsa:375189%09red/hsa:9855%09red/hsa:57121%09red/hsa:1268%09blue/hsa:9771%09blue/hsa:2775%09red/hsa:2149%09blue/hsa:6714%09blue/hsa:9863%09blue/hsa:114%09red/hsa:51735%09blue/…
NOD-like receptor signaling pathway	hsa04621	4.76E-01	1.00E+00	CXCL2|0.00312917920933;NAIP|1024;PYCARD|7.6741129546;TRAF6|0.213158722942;RIPK2|0.291183396617;TAB2|0.329876977693;BIRC3|0.309926924985;PSTPIP1|2.75108363628;HSP90AA1|0.336808394216	9	57	1047	7057	http://www.kegg.jp/kegg-bin/show_pathway?hsa04621/hsa:2920%09blue/hsa:4671%09red/hsa:29108%09red/hsa:7189%09blue/hsa:8767%09blue/hsa:23118%09blue/hsa:330%09blue/hsa:9051%09red/hsa:3320%09blue
TGF-beta signaling pathway	hsa04350	4.81E-01	1.00E+00	LEFTY2|42.2242531447;AMH|0.00189971669416;BMPR1B|18.000935755;BMP8B|8.57418770029;RPS6KB2|0.406126198178;ID2|0.285190928967;ZFYVE9|0.283220971324;TGFB3|4.92457765338;THBS1|0.31864015683;ZFYVE16|0.293208737308;TGFBR1|0.210224103813;E2F5|5.50216727256;BAMBI|3.55537072467	13	84	1047	7057	http://www.kegg.jp/kegg-bin/show_pathway?hsa04350/hsa:7044%09red/hsa:268%09blue/hsa:658%09red/hsa:656%09red/hsa:6199%09blue/hsa:3398%09blue/hsa:9372%09blue/hsa:7043%09red/hsa:7057%09blue/hsa:9765%09blue/hsa:7046%09blue/hsa:1875%09red/hsa:25805%09red
Renin secretion	hsa04924	4.83E-01	1.00E+00	PDE1A|0.00749425093223;AGTR1|0.00184776884126;REN|0.00144973004944;CLCA1|26.9086852881;CACNA1F|16.0;CLCA4|22.9432839683;CLCA2|2.90794503464;ITPR2|0.327598350965;PPP3CB|0.228457862557;EDNRA|0.0908732823325	10	64	1047	7057	http://www.kegg.jp/kegg-bin/show_pathway?hsa04924/hsa:5136%09blue/hsa:185%09blue/hsa:5972%09blue/hsa:1179%09red/hsa:778%09red/hsa:22802%09red/hsa:9635%09red/hsa:3709%09blue/hsa:5532%09blue/hsa:1909%09blue
Vitamin digestion and absorption	hsa04977	4.86E-01	1.00E+00	SCARB1|0.429282718219;PLB1|3.31727818326;MMACHC|9.84915530676;SLC23A1|49.5220797934	4	24	1047	7057	http://www.kegg.jp/kegg-bin/show_pathway?hsa04977/hsa:949%09blue/hsa:151056%09red/hsa:25974%09red/hsa:9963%09red
GnRH signaling pathway	hsa04912	4.86E-01	1.00E+00	PLA2G4E|0.00209330754402;PRKCB|0.00177249835023;GNRH2|5.97939699454;ADCY4|0.378929141628;CACNA1F|16.0;LHB|6.82107913414;SRC|0.493116352247;ITPR2|0.327598350965;ADCY8|3.58010028371;GNRHR|1024;MAP3K3|2.0;SOS2|0.291183396617;ADCY2|0.406126198178;MAP2K1|3.03143313302	14	91	1047	7057	http://www.kegg.jp/kegg-bin/show_pathway?hsa04912/hsa:123745%09blue/hsa:5579%09blue/hsa:2797%09red/hsa:196883%09blue/hsa:778%09red/hsa:3972%09red/hsa:6714%09blue/hsa:3709%09blue/hsa:114%09red/hsa:2798%09red/hsa:4215%09red/hsa:6655%09blue/hsa:108%09blue/hsa:5604%09red
Leukocyte transendothelial migration	hsa04670	4.89E-01	1.00E+00	PRKCB|0.00177249835023;RAC2|6.68070335543;PLCG2|0.417543959714;RASSF5|3.50642288526;CLDN9|27.2843165366;NCF2|9.44794129144;NCF1|6.8685234915;ITK|44.6317973232;CLDN6|0.320856474391;OCLN|0.36349312933;RAP1A|0.31864015683;ROCK2|0.267943365634;CLDN20|17.3877578004;MYL5|158.682585592;NOX1|809.002303348;CLDN22|471.13607712;MYLPF|0.414659772907;CLDN1|0.25881623096	18	118	1047	7057	http://www.kegg.jp/kegg-bin/show_pathway?hsa04670/hsa:5579%09blue/hsa:5880%09red/hsa:5336%09blue/hsa:83593%09red/hsa:9080%09red/hsa:4688%09red/hsa:653361%09red/hsa:3702%09red/hsa:9074%09blue/hsa:100506658%09blue/hsa:5906%09blue/hsa:9475%09blue/hsa:49861%09red/hsa:4636%09red/hsa:27035%09red/hsa:53842%09red/hsa:29895%09blue/hsa:9076%09blue
Bile secretion	hsa04976	4.89E-01	1.00E+00	ADCY4|0.378929141628;ATP1B4|0.00198038960896;SLC5A1|3.50642288526;ABCC2|34.0598458385;SCARB1|0.429282718219;ABCB4|29.6508179805;NCEH1|0.257028456664;ADCY8|3.58010028371;ADCY2|0.406126198178;ATP1B3|0.271683715632;HMGCR|0.38156480224	11	71	1047	7057	http://www.kegg.jp/kegg-bin/show_pathway?hsa04976/hsa:196883%09blue/hsa:23439%09blue/hsa:6523%09red/hsa:1244%09red/hsa:949%09blue/hsa:5244%09red/hsa:57552%09blue/hsa:114%09red/hsa:108%09blue/hsa:483%09blue/hsa:3156%09blue
Melanoma	hsa05218	4.89E-01	1.00E+00	CDKN2A|0.00335377123608;FGF23|8.57418770029;FGF21|5.38893430746;FGF4|0.0009765625;IGF1|5.35171021914;PDGFC|0.267943365634;FGF17|114.563209079;FGF19|0.189464570814;MAP2K1|3.03143313302;BAD|3.89061978965;FGF2|8.45614432449	11	71	1047	7057	http://www.kegg.jp/kegg-bin/show_pathway?hsa05218/hsa:1029%09blue/hsa:8074%09red/hsa:26291%09red/hsa:2249%09blue/hsa:3479%09red/hsa:56034%09blue/hsa:8822%09red/hsa:9965%09blue/hsa:5604%09red/hsa:572%09red/hsa:2247%09red
Progesterone-mediated oocyte maturation	hsa04914	4.91E-01	1.00E+00	CPEB1|0.00367001073912;ADCY4|0.378929141628;PGR|24.9332665491;IGF1|5.35171021914;CCNB3|0.231647015473;SPDYC|67.1818677519;ADCY8|3.58010028371;BUB1|0.251738887514;CDC27|0.283220971324;ADCY2|0.406126198178;PKMYT1|12.7285837401;MAP2K1|3.03143313302;SPDYA|56.1027661642;CPEB4|3.24900958542;HSP90AA1|0.336808394216	15	98	1047	7057	http://www.kegg.jp/kegg-bin/show_pathway?hsa04914/hsa:64506%09blue/hsa:196883%09blue/hsa:5241%09red/hsa:3479%09red/hsa:85417%09blue/hsa:387778%09red/hsa:114%09red/hsa:699%09blue/hsa:996%09blue/hsa:108%09blue/hsa:9088%09red/hsa:5604%09red/hsa:245711%09red/hsa:80315%09red/hsa:3320%09blue
Retinol metabolism	hsa00830	5.04E-01	1.00E+00	UGT1A6|0.0076517210749;CYP1A1|0.00548611279585;RDH12|0.00133402368824;UGT1A10|0.0009765625;RDH16|0.00137152819896;CYP1A2|1024;RDH5|80.4488559694;ADH7|0.00604517575602;RETSAT|3.43426174575;PNPLA4|27.8576180255	10	65	1047	7057	http://www.kegg.jp/kegg-bin/show_pathway?hsa00830/hsa:54578%09blue/hsa:1543%09blue/hsa:145226%09blue/hsa:54575%09blue/hsa:8608%09blue/hsa:1544%09red/hsa:5959%09red/hsa:131%09blue/hsa:54884%09red/hsa:8228%09red
2-Oxocarboxylic acid metabolism	hsa01210	5.13E-01	1.00E+00	NAGS|13.5479249978;GPT|8.69387890021;ACO1|0.429282718219	3	18	1047	7057	http://www.kegg.jp/kegg-bin/show_pathway?hsa01210/hsa:162417%09red/hsa:2875%09red/hsa:48%09blue
Pantothenate and CoA biosynthesis	hsa00770	5.13E-01	1.00E+00	VNN2|0.00296038391897;GADL1|0.00114534663011;AASDHPPT|0.210224103813	3	18	1047	7057	http://www.kegg.jp/kegg-bin/show_pathway?hsa00770/hsa:8875%09blue/hsa:339896%09blue/hsa:60496%09blue
Fc gamma R-mediated phagocytosis	hsa04666	5.21E-01	1.00E+00	PLA2G4E|0.00209330754402;PRKCB|0.00177249835023;DOCK2|0.00191293026872;RAC2|6.68070335543;PLCG2|0.417543959714;SPHK1|11.6317801386;NCF1|6.8685234915;WASF1|0.157126671815;RPS6KB2|0.406126198178;FCGR1A|91.773135873;CFL2|0.244855074397;PIP5K1A|0.432268615654;MAP2K1|3.03143313302;PLPP1|6.58872813814	14	93	1047	7057	http://www.kegg.jp/kegg-bin/show_pathway?hsa04666/hsa:123745%09blue/hsa:5579%09blue/hsa:1794%09blue/hsa:5880%09red/hsa:5336%09blue/hsa:8877%09red/hsa:653361%09red/hsa:8936%09blue/hsa:6199%09blue/hsa:2209%09red/hsa:1073%09blue/hsa:8394%09blue/hsa:5604%09red/hsa:8611%09red
B cell receptor signaling pathway	hsa04662	5.28E-01	1.00E+00	PRKCB|0.00177249835023;RAC2|6.68070335543;PLCG2|0.417543959714;NFATC1|0.0009765625;CD72|12.2100736717;DAPP1|60.1294559497;FOS|0.151774360549;BLNK|5.06302637588;SOS2|0.291183396617;PPP3CB|0.228457862557;MAP2K1|3.03143313302	11	73	1047	7057	http://www.kegg.jp/kegg-bin/show_pathway?hsa04662/hsa:5579%09blue/hsa:5880%09red/hsa:5336%09blue/hsa:4772%09blue/hsa:971%09red/hsa:27071%09red/hsa:2353%09blue/hsa:29760%09red/hsa:6655%09blue/hsa:5532%09blue/hsa:5604%09red
Viral myocarditis	hsa05416	5.42E-01	1.00E+00	RAC2|6.68070335543;SGCA|18.8958825829;CD86|35.5062231062;PRF1|31.778959854;CD80|109.896375864;MYH7|4.65893434587;MYH6|17.7531115531;SGCD|0.295248165357;CASP3|0.233258247884	9	60	1047	7057	http://www.kegg.jp/kegg-bin/show_pathway?hsa05416/hsa:5880%09red/hsa:6442%09red/hsa:942%09red/hsa:5551%09red/hsa:941%09red/hsa:4625%09red/hsa:4624%09red/hsa:6444%09blue/hsa:836%09blue
Choline metabolism in cancer	hsa05231	5.42E-01	1.00E+00	PLA2G4E|0.00209330754402;PRKCB|0.00177249835023;SLC22A4|9.44794129144;RAC2|6.68070335543;WASF1|0.157126671815;RPS6KB2|0.406126198178;FOS|0.151774360549;PDGFC|0.267943365634;SOS2|0.291183396617;CHPT1|0.293208737308;PIP5K1A|0.432268615654;DGKD|4.3469394501;MAP2K1|3.03143313302;SLC44A5|31.3414495228;PLPP1|6.58872813814	15	101	1047	7057	http://www.kegg.jp/kegg-bin/show_pathway?hsa05231/hsa:123745%09blue/hsa:5579%09blue/hsa:6583%09red/hsa:5880%09red/hsa:8936%09blue/hsa:6199%09blue/hsa:2353%09blue/hsa:56034%09blue/hsa:6655%09blue/hsa:56994%09blue/hsa:8394%09blue/hsa:8527%09red/hsa:5604%09red/hsa:204962%09red/hsa:8611%09red
Gastric acid secretion	hsa04971	5.48E-01	1.00E+00	KCNJ1|0.00897420589841;PRKCB|0.00177249835023;SST|0.00109868992645;ATP4A|0.00118573719179;ADCY4|0.378929141628;ATP1B4|0.00198038960896;SLC26A7|0.213158722942;ITPR2|0.327598350965;ADCY8|3.58010028371;ADCY2|0.406126198178;ATP1B3|0.271683715632	11	74	1047	7057	http://www.kegg.jp/kegg-bin/show_pathway?hsa04971/hsa:3758%09blue/hsa:5579%09blue/hsa:6750%09blue/hsa:495%09blue/hsa:196883%09blue/hsa:23439%09blue/hsa:115111%09blue/hsa:3709%09blue/hsa:114%09red/hsa:108%09blue/hsa:483%09blue
Phenylalanine, tyrosine and tryptophan biosynthesis	hsa00400	5.52E-01	1.00E+00	PAH|0.00744248435972	1	5	1047	7057	http://www.kegg.jp/kegg-bin/show_pathway?hsa00400/hsa:5053%09blue
Caffeine metabolism	hsa00232	5.52E-01	1.00E+00	CYP1A2|1024	1	5	1047	7057	http://www.kegg.jp/kegg-bin/show_pathway?hsa00232/hsa:1544%09red
Circadian entrainment	hsa04713	5.56E-01	1.00E+00	PRKCB|0.00177249835023;ADCY4|0.378929141628;GRIN2C|4.59479341999;CACNA1I|2.18858740252;GRIN2D|7.361501205;CACNA1G|0.453759577659;GNAO1|4.3469394501;GRIA3|0.295248165357;FOS|0.151774360549;GNG13|1024;ADCY8|3.58010028371;ADCY2|0.406126198178;GNG3|45.8865679365;GNG10|0.148650889375	14	95	1047	7057	http://www.kegg.jp/kegg-bin/show_pathway?hsa04713/hsa:5579%09blue/hsa:196883%09blue/hsa:2905%09red/hsa:8911%09red/hsa:2906%09red/hsa:8913%09blue/hsa:2775%09red/hsa:2892%09blue/hsa:2353%09blue/hsa:51764%09red/hsa:114%09red/hsa:108%09blue/hsa:2785%09red/hsa:2790%09blue
Glycerophospholipid metabolism	hsa00564	5.56E-01	1.00E+00	PLA2G4E|0.00209330754402;PLA2G2F|0.00135264596495;PHOSPHO1|14.8254089902;LPIN1|0.303548721099;ACHE|6.49801917085;PLB1|3.31727818326;GPAT2|84.4485062895;LPIN3|3.53081198516;LPGAT1|0.417543959714;CHPT1|0.293208737308;DGKD|4.3469394501;AGPAT5|0.285190928967;ADPRM|3.81055199218;PLPP1|6.58872813814	14	95	1047	7057	http://www.kegg.jp/kegg-bin/show_pathway?hsa00564/hsa:123745%09blue/hsa:64600%09blue/hsa:162466%09red/hsa:23175%09blue/hsa:43%09red/hsa:151056%09red/hsa:150763%09red/hsa:64900%09red/hsa:9926%09blue/hsa:56994%09blue/hsa:8527%09red/hsa:55326%09blue/hsa:56985%09red/hsa:8611%09red
Insulin resistance	hsa04931	5.60E-01	1.00E+00	PRKCB|0.00177249835023;GYS2|0.00166530252298;CREB3L3|0.00571908474979;PPP1R3A|21.2589730255;NOS3|2.67585510957;FOXO1|2.37841423001;PRKAG2|7.31065160184;PPP1R3D|0.339151081862;RPS6KB2|0.406126198178;CREB3L4|3.34035167771;PPARA|2.4966610978;MGEA5|0.293208737308;NR1H3|2.96904714126;OGT|0.291183396617;CREB3|2.58470566127;PPP1CB|0.216134307827	16	109	1047	7057	http://www.kegg.jp/kegg-bin/show_pathway?hsa04931/hsa:5579%09blue/hsa:2998%09blue/hsa:84699%09blue/hsa:5506%09red/hsa:4846%09red/hsa:2308%09red/hsa:51422%09red/hsa:5509%09blue/hsa:6199%09blue/hsa:148327%09red/hsa:5465%09red/hsa:10724%09blue/hsa:10062%09red/hsa:8473%09blue/hsa:10488%09red/hsa:5500%09blue
Proteoglycans in cancer	hsa05205	5.64E-01	1.00E+00	VTN|0.00330759887642;IHH|0.0076517210749;PRKCB|0.00177249835023;PLCG2|0.417543959714;WNT8B|28.4429657973;IGF1|5.35171021914;FZD9|23.5883074767;FRS2|0.216134307827;HSPB2|2.62078680772;HPSE|20.534814361;WNT2B|12.9960383417;WNT10B|0.271683715632;SRC|0.493116352247;PLAUR|2.96904714126;RPS6KB2|0.406126198178;CBLB|0.285190928967;GAB1|0.320856474391;CBLC|3.53081198516;ITPR2|0.327598350965;SOS2|0.2911833…	30	205	1047	7057	http://www.kegg.jp/kegg-bin/show_pathway?hsa05205/hsa:7448%09blue/hsa:3549%09blue/hsa:5579%09blue/hsa:5336%09blue/hsa:7479%09red/hsa:3479%09red/hsa:8326%09red/hsa:10818%09blue/hsa:3316%09red/hsa:10855%09red/hsa:7482%09red/hsa:7480%09blue/hsa:6714%09blue/hsa:5329%09red/hsa:6199%09blue/hsa:868%09blue/hsa:2549%09blue/hsa:23624%09red/hsa:3709%09blue/hsa:6655%09blue/hsa:81578%09blue/hsa:2318%09red/hsa…
Biosynthesis of amino acids	hsa01230	5.67E-01	1.00E+00	PAH|0.00744248435972;ALDOB|0.0009765625;TKTL2|0.426317445884;OTC|16.795466938;NAGS|13.5479249978;ENO3|2.07052984768;GPT|8.69387890021;ACO1|0.429282718219;CTH|0.185565446329;ALDH7A1|2.18858740252;ARG2|2.92817139189	11	75	1047	7057	http://www.kegg.jp/kegg-bin/show_pathway?hsa01230/hsa:5053%09blue/hsa:229%09blue/hsa:84076%09blue/hsa:5009%09red/hsa:162417%09red/hsa:2027%09red/hsa:2875%09red/hsa:48%09blue/hsa:1491%09blue/hsa:501%09red/hsa:384%09red
Pertussis	hsa05133	5.67E-01	1.00E+00	C4BPB|0.00225915660919;C1QB|0.0009765625;C2|8.57418770029;CD14|9.38267959386;IL12A|18.8958825829;PYCARD|7.6741129546;IRF8|15.889479927;TRAF6|0.213158722942;FOS|0.151774360549;CFL2|0.244855074397;CASP3|0.233258247884	11	75	1047	7057	http://www.kegg.jp/kegg-bin/show_pathway?hsa05133/hsa:725%09blue/hsa:713%09blue/hsa:717%09red/hsa:929%09red/hsa:3592%09red/hsa:29108%09red/hsa:3394%09red/hsa:7189%09blue/hsa:2353%09blue/hsa:1073%09blue/hsa:836%09blue
Phospholipase D signaling pathway	hsa04072	5.71E-01	1.00E+00	AVPR2|0.00515432777646;PLA2G4E|0.00209330754402;AGTR1|0.00184776884126;GRM4|10.6294865128;ADCY4|0.378929141628;PLCG2|0.417543959714;CYTH4|4.85677953758;SPHK1|11.6317801386;SHC3|0.353553390593;LPAR5|47.8351759563;F2R|0.334481888697;GAB1|0.320856474391;ADCY8|3.58010028371;PDGFC|0.267943365634;SOS2|0.291183396617;ADCY2|0.406126198178;PIP5K1A|0.432268615654;DGKD|4.3469394501;AGPAT5|0.285190928967;MAP…	21	144	1047	7057	http://www.kegg.jp/kegg-bin/show_pathway?hsa04072/hsa:554%09blue/hsa:123745%09blue/hsa:185%09blue/hsa:2914%09red/hsa:196883%09blue/hsa:5336%09blue/hsa:27128%09red/hsa:8877%09red/hsa:53358%09blue/hsa:57121%09red/hsa:2149%09blue/hsa:2549%09blue/hsa:114%09red/hsa:56034%09blue/hsa:6655%09blue/hsa:108%09blue/hsa:8394%09blue/hsa:8527%09red/hsa:55326%09blue/hsa:5604%09red/hsa:8611%09red
Fat digestion and absorption	hsa04975	5.82E-01	1.00E+00	FABP1|0.0018223300616;PLA2G2F|0.00135264596495;DGAT2|0.0009765625;SCARB1|0.429282718219;PLPP1|6.58872813814;ACAT2|2.31337636781	6	41	1047	7057	http://www.kegg.jp/kegg-bin/show_pathway?hsa04975/hsa:2168%09blue/hsa:64600%09blue/hsa:84649%09blue/hsa:949%09blue/hsa:8611%09red/hsa:39%09red
Bladder cancer	hsa05219	5.82E-01	1.00E+00	CDKN2A|0.00335377123608;DAPK2|0.0009765625;MMP1|8.87655577654;SRC|0.493116352247;THBS1|0.31864015683;MAP2K1|3.03143313302	6	41	1047	7057	http://www.kegg.jp/kegg-bin/show_pathway?hsa05219/hsa:1029%09blue/hsa:23604%09blue/hsa:4312%09red/hsa:6714%09blue/hsa:7057%09blue/hsa:5604%09red
Pathogenic Escherichia coli infection	hsa05130	5.83E-01	1.00E+00	CD14|9.38267959386;TUBB1|59.7141114584;OCLN|0.36349312933;ROCK2|0.267943365634;TLR5|57.2816045394;CLDN1|0.25881623096;NCL|0.257028456664;YWHAQ|0.289172045976	8	55	1047	7057	http://www.kegg.jp/kegg-bin/show_pathway?hsa05130/hsa:929%09red/hsa:81027%09red/hsa:100506658%09blue/hsa:9475%09blue/hsa:7100%09red/hsa:9076%09blue/hsa:4691%09blue/hsa:10971%09blue
Phototransduction	hsa04744	5.84E-01	1.00E+00	GRK7|5.65685424949;GNAT1|0.371130892657;PDE6A|17.3877578004;GNAT2|1024	4	27	1047	7057	http://www.kegg.jp/kegg-bin/show_pathway?hsa04744/hsa:131890%09red/hsa:2779%09blue/hsa:5145%09red/hsa:2780%09red
Osteoclast differentiation	hsa04380	5.95E-01	1.00E+00	OSCAR|0.00250669120618;CSF1|3.6807506025;PLCG2|0.417543959714;NFATC1|0.0009765625;TYROBP|3.8637453157;NCF2|9.44794129144;NCF1|6.8685234915;FOSL1|66.7178086938;SIRPB1|0.414659772907;TRAF6|0.213158722942;FOS|0.151774360549;BLNK|5.06302637588;FCGR1A|91.773135873;TAB2|0.329876977693;LILRB1|0.0009765625;PPP3CB|0.228457862557;MAP2K1|3.03143313302;TGFBR1|0.210224103813;NOX1|809.002303348	19	132	1047	7057	http://www.kegg.jp/kegg-bin/show_pathway?hsa04380/hsa:126014%09blue/hsa:1435%09red/hsa:5336%09blue/hsa:4772%09blue/hsa:7305%09red/hsa:4688%09red/hsa:653361%09red/hsa:8061%09red/hsa:10326%09blue/hsa:7189%09blue/hsa:2353%09blue/hsa:29760%09red/hsa:2209%09red/hsa:23118%09blue/hsa:10859%09blue/hsa:5532%09blue/hsa:5604%09red/hsa:7046%09blue/hsa:27035%09red
Tight junction	hsa04530	5.97E-01	1.00E+00	RAB3B|0.00212252902837;PRKCB|0.00177249835023;MYH15|9.84915530676;CLDN9|27.2843165366;MYH1|5.89707686916;MYH7B|3.53081198516;MYH7|4.65893434587;SRC|0.493116352247;CLDN6|0.320856474391;OCLN|0.36349312933;MYH6|17.7531115531;MAGI2|0.435275281648;PPP2R2A|0.343885454535;CLDN20|17.3877578004;MYL5|158.682585592;EPB41L2|0.366021423986;CLDN22|471.13607712;CSNK2B|2.42838976879;MYLPF|0.414659772907;CLDN1|0.…	20	139	1047	7057	http://www.kegg.jp/kegg-bin/show_pathway?hsa04530/hsa:5865%09blue/hsa:5579%09blue/hsa:22989%09red/hsa:9080%09red/hsa:4619%09red/hsa:57644%09red/hsa:4625%09red/hsa:6714%09blue/hsa:9074%09blue/hsa:100506658%09blue/hsa:4624%09red/hsa:9863%09blue/hsa:5520%09blue/hsa:49861%09red/hsa:4636%09red/hsa:2037%09blue/hsa:53842%09red/hsa:1460%09red/hsa:29895%09blue/hsa:9076%09blue
Hepatitis B	hsa05161	5.98E-01	1.00E+00	PRKCB|0.00177249835023;CREB3L3|0.00571908474979;NFATC1|0.0009765625;IKBKE|4.08404850283;STAT6|2.53151318794;CCNE1|0.0877778047336;FADD|3.50642288526;SRC|0.493116352247;FOS|0.151774360549;CREB3L4|3.34035167771;BCL2|0.196146024474;APAF1|0.25881623096;CASP3|0.233258247884;TGFB3|4.92457765338;MAP2K1|3.03143313302;TGFBR1|0.210224103813;BAD|3.89061978965;CREB3|2.58470566127;PCNA|0.122427537198;DDX3X|0.…	21	146	1047	7057	http://www.kegg.jp/kegg-bin/show_pathway?hsa05161/hsa:5579%09blue/hsa:84699%09blue/hsa:4772%09blue/hsa:9641%09red/hsa:6778%09red/hsa:898%09blue/hsa:8772%09red/hsa:6714%09blue/hsa:2353%09blue/hsa:148327%09red/hsa:596%09blue/hsa:317%09blue/hsa:836%09blue/hsa:7043%09red/hsa:5604%09red/hsa:7046%09blue/hsa:572%09red/hsa:10488%09red/hsa:5111%09blue/hsa:1654%09blue/hsa:10971%09blue
Regulation of actin cytoskeleton	hsa04810	6.00E-01	1.00E+00	RAC2|6.68070335543;FGF23|8.57418770029;FGFR4|0.0009765625;CD14|9.38267959386;FGF21|5.38893430746;FGF4|0.0009765625;WASF1|0.157126671815;PFN4|16.0;ITGAE|17.7531115531;ITGB7|15.1369223476;CHRM4|37.5307183754;ITGA3|0.432268615654;ITGB8|0.159320078415;F2R|0.334481888697;SRC|0.493116352247;PDGFC|0.267943365634;ABI2|0.371130892657;CFL2|0.244855074397;SOS2|0.291183396617;FGF17|114.563209079;ITGA9|0.3208…	31	215	1047	7057	http://www.kegg.jp/kegg-bin/show_pathway?hsa04810/hsa:5880%09red/hsa:8074%09red/hsa:2264%09blue/hsa:929%09red/hsa:26291%09red/hsa:2249%09blue/hsa:8936%09blue/hsa:375189%09red/hsa:3682%09red/hsa:3695%09red/hsa:1132%09red/hsa:3675%09blue/hsa:3696%09blue/hsa:2149%09blue/hsa:6714%09blue/hsa:56034%09blue/hsa:10152%09blue/hsa:1073%09blue/hsa:6655%09blue/hsa:8822%09red/hsa:3680%09blue/hsa:9475%09blue/hs…
Rheumatoid arthritis	hsa05323	6.05E-01	1.00E+00	IL15|0.0009765625;ATP6V1G3|0.0009765625;CSF1|3.6807506025;CD86|35.5062231062;CD80|109.896375864;MMP3|9.25350547124;MMP1|8.87655577654;ATP6V1G2|3.89061978965;FOS|0.151774360549;ATP6V0A4|16.4498212265;LTB|11.1579493308;TGFB3|4.92457765338;ATP6V1C2|326.287520594	13	91	1047	7057	http://www.kegg.jp/kegg-bin/show_pathway?hsa05323/hsa:3600%09blue/hsa:127124%09blue/hsa:1435%09red/hsa:942%09red/hsa:941%09red/hsa:4314%09red/hsa:4312%09red/hsa:534%09red/hsa:2353%09blue/hsa:50617%09red/hsa:4050%09red/hsa:7043%09red/hsa:245973%09red
Glyoxylate and dicarboxylate metabolism	hsa00630	6.14E-01	1.00E+00	GLYCTK|3.07375036258;ACO1|0.429282718219;MDH1|0.269807059126;ACAT2|2.31337636781	4	28	1047	7057	http://www.kegg.jp/kegg-bin/show_pathway?hsa00630/hsa:132158%09red/hsa:48%09blue/hsa:4190%09blue/hsa:39%09red
Inositol phosphate metabolism	hsa00562	6.22E-01	1.00E+00	PIP5KL1|2.7132086549;PLCG2|0.417543959714;PLCD4|11.6317801386;PLCH1|0.334481888697;IPPK|3.09512998708;PIK3C2G|0.273573425315;OCRL|0.38958228983;PIP5K1A|0.432268615654;PIK3C2A|0.305660069423;MTMR4|0.447512535464	10	71	1047	7057	http://www.kegg.jp/kegg-bin/show_pathway?hsa00562/hsa:138429%09red/hsa:5336%09blue/hsa:84812%09red/hsa:23007%09blue/hsa:64768%09red/hsa:5288%09blue/hsa:4952%09blue/hsa:8394%09blue/hsa:5286%09blue/hsa:9110%09blue
Arginine and proline metabolism	hsa00330	6.27E-01	1.00E+00	CARNS1|4.56305486347;NOS3|2.67585510957;CKMT1A|12.5533455663;ALDH2|2.21913894414;AMD1|0.346277367028;ALDH7A1|2.18858740252;ARG2|2.92817139189	7	50	1047	7057	http://www.kegg.jp/kegg-bin/show_pathway?hsa00330/hsa:57571%09red/hsa:4846%09red/hsa:1159%09red/hsa:217%09red/hsa:262%09blue/hsa:501%09red/hsa:384%09red
Intestinal immune network for IgA production	hsa04672	6.27E-01	1.00E+00	IL15|0.0009765625;CD86|35.5062231062;IL15RA|8.0;CD80|109.896375864;ITGB7|15.1369223476;CCL25|4.46914855229;CCR10|44.3235029795	7	50	1047	7057	http://www.kegg.jp/kegg-bin/show_pathway?hsa04672/hsa:3600%09blue/hsa:942%09red/hsa:3601%09red/hsa:941%09red/hsa:3695%09red/hsa:6370%09red/hsa:2826%09red
Pentose and glucuronate interconversions	hsa00040	6.35E-01	1.00E+00	UGT1A6|0.0076517210749;KL|0.00166530252298;UGT1A10|0.0009765625;ALDH2|2.21913894414;UGDH|0.293208737308	5	36	1047	7057	http://www.kegg.jp/kegg-bin/show_pathway?hsa00040/hsa:54578%09blue/hsa:9365%09blue/hsa:54575%09blue/hsa:217%09red/hsa:7358%09blue
Glycosphingolipid biosynthesis - globo series	hsa00603	6.37E-01	1.00E+00	FUT2|2.73208051351;NAGA|16.4498212265	2	14	1047	7057	http://www.kegg.jp/kegg-bin/show_pathway?hsa00603/hsa:2524%09red/hsa:4668%09red
Salmonella infection	hsa05132	6.38E-01	1.00E+00	CXCL2|0.00312917920933;CCL4|0.00118573719179;CD14|9.38267959386;RILP|2.46228882669;WASF1|0.157126671815;PFN4|16.0;PYCARD|7.6741129546;FOS|0.151774360549;KLC2|3.18214593502;FLNC|4.95883079976;ROCK2|0.267943365634;TLR5|57.2816045394	12	86	1047	7057	http://www.kegg.jp/kegg-bin/show_pathway?hsa05132/hsa:2920%09blue/hsa:388372%09blue/hsa:929%09red/hsa:83547%09red/hsa:8936%09blue/hsa:375189%09red/hsa:29108%09red/hsa:2353%09blue/hsa:64837%09red/hsa:2318%09red/hsa:9475%09blue/hsa:7100%09red
Prolactin signaling pathway	hsa04917	6.41E-01	1.00E+00	ESR2|11.5514335642;SHC3|0.353553390593;CISH|4.92457765338;LHB|6.82107913414;SRC|0.493116352247;FOS|0.151774360549;SOS2|0.291183396617;MAP2K1|3.03143313302;CCND2|0.466516495768;PRL|288.01497208	10	72	1047	7057	http://www.kegg.jp/kegg-bin/show_pathway?hsa04917/hsa:2100%09red/hsa:53358%09blue/hsa:1154%09red/hsa:3972%09red/hsa:6714%09blue/hsa:2353%09blue/hsa:6655%09blue/hsa:5604%09red/hsa:894%09blue/hsa:5617%09red
Linoleic acid metabolism	hsa00591	6.43E-01	1.00E+00	PLA2G4E|0.00209330754402;PLA2G2F|0.00135264596495;CYP1A2|1024;PLB1|3.31727818326	4	29	1047	7057	http://www.kegg.jp/kegg-bin/show_pathway?hsa00591/hsa:123745%09blue/hsa:64600%09blue/hsa:1544%09red/hsa:151056%09red
Vasopressin-regulated water reabsorption	hsa04962	6.54E-01	1.00E+00	AVPR2|0.00515432777646;CREB3L3|0.00571908474979;CREB3L4|3.34035167771;AQP3|0.334481888697;CREB3|2.58470566127;DYNC2LI1|308.686803889	6	44	1047	7057	http://www.kegg.jp/kegg-bin/show_pathway?hsa04962/hsa:554%09blue/hsa:84699%09blue/hsa:148327%09red/hsa:360%09blue/hsa:10488%09red/hsa:51626%09red
Type I diabetes mellitus	hsa04940	6.54E-01	1.00E+00	CD86|35.5062231062;IL12A|18.8958825829;PRF1|31.778959854;CD80|109.896375864;CPE|4.69133979693;HSPD1|0.320856474391	6	44	1047	7057	http://www.kegg.jp/kegg-bin/show_pathway?hsa04940/hsa:942%09red/hsa:3592%09red/hsa:5551%09red/hsa:941%09red/hsa:1363%09red/hsa:3329%09blue
Fatty acid degradation	hsa00071	6.54E-01	1.00E+00	ADH7|0.00604517575602;EHHADH|0.174342958294;ALDH2|2.21913894414;ALDH7A1|2.18858740252;ECI1|5.02805349809;ACAT2|2.31337636781	6	44	1047	7057	http://www.kegg.jp/kegg-bin/show_pathway?hsa00071/hsa:131%09blue/hsa:1962%09blue/hsa:217%09red/hsa:501%09red/hsa:1632%09red/hsa:39%09red
Chronic myeloid leukemia	hsa05220	6.59E-01	1.00E+00	CDKN2A|0.00335377123608;SHC3|0.353553390593;CBLB|0.285190928967;CBLC|3.53081198516;SOS2|0.291183396617;BCL2L1|0.463294030945;TGFB3|4.92457765338;MAP2K1|3.03143313302;TGFBR1|0.210224103813;BAD|3.89061978965	10	73	1047	7057	http://www.kegg.jp/kegg-bin/show_pathway?hsa05220/hsa:1029%09blue/hsa:53358%09blue/hsa:868%09blue/hsa:23624%09red/hsa:6655%09blue/hsa:598%09blue/hsa:7043%09red/hsa:5604%09red/hsa:7046%09blue/hsa:572%09red
Long-term potentiation	hsa04720	6.61E-01	1.00E+00	PRKCB|0.00177249835023;GRIN2C|4.59479341999;GRIN2D|7.361501205;ITPR2|0.327598350965;ADCY8|3.58010028371;PPP3CB|0.228457862557;RAP1A|0.31864015683;MAP2K1|3.03143313302;PPP1CB|0.216134307827	9	66	1047	7057	http://www.kegg.jp/kegg-bin/show_pathway?hsa04720/hsa:5579%09blue/hsa:2905%09red/hsa:2906%09red/hsa:3709%09blue/hsa:114%09red/hsa:5532%09blue/hsa:5906%09blue/hsa:5604%09red/hsa:5500%09blue
Inflammatory bowel disease (IBD)	hsa05321	6.61E-01	1.00E+00	IL21R|0.00754637756973;IL17F|0.00215215842945;NFATC1|0.0009765625;FOXP3|7.21000370089;IL12A|18.8958825829;STAT6|2.53151318794;IL12RB2|10.8528346196;TGFB3|4.92457765338;TLR5|57.2816045394	9	66	1047	7057	http://www.kegg.jp/kegg-bin/show_pathway?hsa05321/hsa:50615%09blue/hsa:112744%09blue/hsa:4772%09blue/hsa:50943%09red/hsa:3592%09red/hsa:6778%09red/hsa:3595%09red/hsa:7043%09red/hsa:7100%09red
Glutathione metabolism	hsa00480	6.70E-01	1.00E+00	GGT1|2.80888975148;GGT5|3.24900958542;GPX2|19.1596592739;GSTO2|13.1774562763;GPX3|16.6794521735;MGST2|18.37917368;GSTA4|0.31425334363	7	52	1047	7057	http://www.kegg.jp/kegg-bin/show_pathway?hsa00480/hsa:2678%09red/hsa:2687%09red/hsa:2877%09red/hsa:119391%09red/hsa:2878%09red/hsa:4258%09red/hsa:2941%09blue
Nicotinate and nicotinamide metabolism	hsa00760	6.70E-01	1.00E+00	CD38|6.23331663728;NT5M|5.02805349809;NT5E|6.32033049491;NT5C|3.01049349482	4	30	1047	7057	http://www.kegg.jp/kegg-bin/show_pathway?hsa00760/hsa:952%09red/hsa:56953%09red/hsa:4907%09red/hsa:30833%09red
ErbB signaling pathway	hsa04012	6.71E-01	1.00E+00	PRKCB|0.00177249835023;EREG|4.31691294602;PLCG2|0.417543959714;SHC3|0.353553390593;SRC|0.493116352247;RPS6KB2|0.406126198178;CBLB|0.285190928967;GAB1|0.320856474391;CBLC|3.53081198516;SOS2|0.291183396617;MAP2K1|3.03143313302;BAD|3.89061978965	12	88	1047	7057	http://www.kegg.jp/kegg-bin/show_pathway?hsa04012/hsa:5579%09blue/hsa:2069%09red/hsa:5336%09blue/hsa:53358%09blue/hsa:6714%09blue/hsa:6199%09blue/hsa:868%09blue/hsa:2549%09blue/hsa:23624%09red/hsa:6655%09blue/hsa:5604%09red/hsa:572%09red
Glycosaminoglycan biosynthesis - keratan sulfate	hsa00533	6.75E-01	1.00E+00	CHST1|12.2950014503;B4GALT3|4.3469394501	2	15	1047	7057	http://www.kegg.jp/kegg-bin/show_pathway?hsa00533/hsa:8534%09red/hsa:8703%09red
ABC transporters	hsa02010	6.76E-01	1.00E+00	ABCA6|0.0019667100587;ABCA4|2.77021893622;ABCC2|34.0598458385;ABCB4|29.6508179805;ABCA5|0.275476278969;ABCB10|0.368567304323	6	45	1047	7057	http://www.kegg.jp/kegg-bin/show_pathway?hsa02010/hsa:23460%09blue/hsa:24%09red/hsa:1244%09red/hsa:5244%09red/hsa:23461%09blue/hsa:23456%09blue
Leishmaniasis	hsa05140	6.76E-01	1.00E+00	PRKCB|0.00177249835023;CR1|0.219151430329;IL12A|18.8958825829;NCF2|9.44794129144;NCF1|6.8685234915;TRAF6|0.213158722942;FOS|0.151774360549;FCGR1A|91.773135873;TAB2|0.329876977693;TGFB3|4.92457765338	10	74	1047	7057	http://www.kegg.jp/kegg-bin/show_pathway?hsa05140/hsa:5579%09blue/hsa:1378%09blue/hsa:3592%09red/hsa:4688%09red/hsa:653361%09red/hsa:7189%09blue/hsa:2353%09blue/hsa:2209%09red/hsa:23118%09blue/hsa:7043%09red
TNF signaling pathway	hsa04668	6.80E-01	1.00E+00	CXCL2|0.00312917920933;CREB3L3|0.00571908474979;IL15|0.0009765625;CSF1|3.6807506025;MMP3|9.25350547124;FADD|3.50642288526;BCL3|7.21000370089;FOS|0.151774360549;CREB3L4|3.34035167771;TAB2|0.329876977693;BIRC3|0.309926924985;CASP3|0.233258247884;ITCH|0.287174588749;MAP2K1|3.03143313302;CREB3|2.58470566127	15	110	1047	7057	http://www.kegg.jp/kegg-bin/show_pathway?hsa04668/hsa:2920%09blue/hsa:84699%09blue/hsa:3600%09blue/hsa:1435%09red/hsa:4314%09red/hsa:8772%09red/hsa:602%09red/hsa:2353%09blue/hsa:148327%09red/hsa:23118%09blue/hsa:330%09blue/hsa:836%09blue/hsa:83737%09blue/hsa:5604%09red/hsa:10488%09red
Renin-angiotensin system	hsa04614	6.85E-01	1.00E+00	AGTR1|0.00184776884126;REN|0.00144973004944;ENPEP|35.0173984403	3	23	1047	7057	http://www.kegg.jp/kegg-bin/show_pathway?hsa04614/hsa:185%09blue/hsa:5972%09blue/hsa:2028%09red
AMPK signaling pathway	hsa04152	6.91E-01	1.00E+00	LEP|0.00675419711959;PFKFB1|0.00344805857926;GYS2|0.00166530252298;CREB3L3|0.00571908474979;IGF1|5.35171021914;FOXO1|2.37841423001;PRKAG2|7.31065160184;EEF2K|0.473028823363;RPS6KB2|0.406126198178;CREB3L4|3.34035167771;LIPE|5.77571678209;PPP2R2A|0.343885454535;PPP2R5E|0.231647015473;RAB14|0.289172045976;PPP2R5D|6.32033049491;HMGCR|0.38156480224;CREB3|2.58470566127	17	125	1047	7057	http://www.kegg.jp/kegg-bin/show_pathway?hsa04152/hsa:3952%09blue/hsa:5207%09blue/hsa:2998%09blue/hsa:84699%09blue/hsa:3479%09red/hsa:2308%09red/hsa:51422%09red/hsa:101930123%09blue/hsa:6199%09blue/hsa:148327%09red/hsa:3991%09red/hsa:5520%09blue/hsa:5529%09blue/hsa:51552%09blue/hsa:5528%09red/hsa:3156%09blue/hsa:10488%09red
Mucin type O-Glycan biosynthesis	hsa00512	6.96E-01	1.00E+00	ST6GALNAC1|0.00718896602051;GCNT3|3.09512998708;WBSCR17|0.312082637225;GALNT12|5.16941132255	4	31	1047	7057	http://www.kegg.jp/kegg-bin/show_pathway?hsa00512/hsa:55808%09blue/hsa:9245%09red/hsa:64409%09blue/hsa:79695%09red
Carbohydrate digestion and absorption	hsa04973	6.97E-01	1.00E+00	PRKCB|0.00177249835023;ATP1B4|0.00198038960896;LCT|7.46426393229;SLC5A1|3.50642288526;TAS1R3|7.01284577053;ATP1B3|0.271683715632	6	46	1047	7057	http://www.kegg.jp/kegg-bin/show_pathway?hsa04973/hsa:5579%09blue/hsa:23439%09blue/hsa:3938%09red/hsa:6523%09red/hsa:83756%09red/hsa:483%09blue
Apoptosis	hsa04210	7.00E-01	1.00E+00	CTSF|0.00708999340092;TNFRSF10B|0.00161976473792;NTRK1|2.82842712475;HRK|2.46228882669;PRF1|31.778959854;PIDD1|3.11665831864;CTSW|66.2569551258;FADD|3.50642288526;FOS|0.151774360549;ITPR2|0.327598350965;BCL2|0.196146024474;BIRC3|0.309926924985;GADD45B|4.89056111077;APAF1|0.25881623096;BCL2L1|0.463294030945;CASP3|0.233258247884;MAP2K1|3.03143313302;BAD|3.89061978965;ENDOG|18.37917368	19	140	1047	7057	http://www.kegg.jp/kegg-bin/show_pathway?hsa04210/hsa:8722%09blue/hsa:8795%09blue/hsa:4914%09red/hsa:8739%09red/hsa:5551%09red/hsa:55367%09red/hsa:1521%09red/hsa:8772%09red/hsa:2353%09blue/hsa:3709%09blue/hsa:596%09blue/hsa:330%09blue/hsa:4616%09red/hsa:317%09blue/hsa:598%09blue/hsa:836%09blue/hsa:5604%09red/hsa:572%09red/hsa:2021%09red
Pyrimidine metabolism	hsa00240	7.10E-01	1.00E+00	AK9|5.54043787244;NME5|0.0009765625;TWISTNB|7.21000370089;NT5M|5.02805349809;UPP2|1024;ENTPD8|178.527189293;TXNRD2|2.62078680772;NT5E|6.32033049491;NME7|0.214641359109;NT5C|3.01049349482;PRIM2|0.244855074397;ENTPD3|5.27803164309;POLR3C|4.02782220023;POLR2B|3.73213196615	14	105	1047	7057	http://www.kegg.jp/kegg-bin/show_pathway?hsa00240/hsa:221264%09red/hsa:8382%09blue/hsa:221830%09red/hsa:56953%09red/hsa:151531%09red/hsa:377841%09red/hsa:10587%09red/hsa:4907%09red/hsa:29922%09blue/hsa:30833%09red/hsa:5558%09blue/hsa:956%09red/hsa:10623%09red/hsa:5431%09red
Glycosaminoglycan biosynthesis - heparan sulfate / heparin	hsa00534	7.13E-01	1.00E+00	HS3ST2|2.94853843458;HS3ST3B1|0.307786103336;GLCE|0.243163736853	3	24	1047	7057	http://www.kegg.jp/kegg-bin/show_pathway?hsa00534/hsa:9956%09red/hsa:9953%09blue/hsa:26035%09blue
Endocrine and other factor-regulated calcium reabsorption	hsa04961	7.17E-01	1.00E+00	PRKCB|0.00177249835023;KL|0.00166530252298;ATP1B4|0.00198038960896;CALB1|227.543726379;ATP1B3|0.271683715632;CLTC|0.38156480224	6	47	1047	7057	http://www.kegg.jp/kegg-bin/show_pathway?hsa04961/hsa:5579%09blue/hsa:9365%09blue/hsa:23439%09blue/hsa:793%09red/hsa:483%09blue/hsa:1213%09blue
Sphingolipid metabolism	hsa00600	7.17E-01	1.00E+00	GAL3ST1|0.00243814560332;SPHK1|11.6317801386;SMPD1|2.25011696938;GBA2|5.50216727256;SMPD4|15.6707247614;PLPP1|6.58872813814	6	47	1047	7057	http://www.kegg.jp/kegg-bin/show_pathway?hsa00600/hsa:9514%09blue/hsa:8877%09red/hsa:6609%09red/hsa:57704%09red/hsa:55627%09red/hsa:8611%09red
Neurotrophin signaling pathway	hsa04722	7.18E-01	1.00E+00	NTRK1|2.82842712475;PLCG2|0.417543959714;IRAK2|0.0009765625;SHC3|0.353553390593;FRS2|0.216134307827;SH2B1|2.39495740924;GAB1|0.320856474391;TRAF6|0.213158722942;RIPK2|0.291183396617;BCL2|0.196146024474;MAP3K3|2.0;SOS2|0.291183396617;SH2B3|9.18958683998;RAP1A|0.31864015683;MAP2K1|3.03143313302;BAD|3.89061978965	16	120	1047	7057	http://www.kegg.jp/kegg-bin/show_pathway?hsa04722/hsa:4914%09red/hsa:5336%09blue/hsa:3656%09blue/hsa:53358%09blue/hsa:10818%09blue/hsa:25970%09red/hsa:2549%09blue/hsa:7189%09blue/hsa:8767%09blue/hsa:596%09blue/hsa:4215%09red/hsa:6655%09blue/hsa:10019%09red/hsa:5906%09blue/hsa:5604%09red/hsa:572%09red
Regulation of autophagy	hsa04140	7.28E-01	1.00E+00	GABARAP|0.00193963378015;ATG14|0.316439148493;PIK3R4|0.31864015683;ATG4D|4.78991481848;ATG12|7.7274906314	5	40	1047	7057	http://www.kegg.jp/kegg-bin/show_pathway?hsa04140/hsa:11337%09blue/hsa:22863%09blue/hsa:30849%09blue/hsa:84971%09red/hsa:9140%09red
RIG-I-like receptor signaling pathway	hsa04622	7.30E-01	1.00E+00	IKBKE|4.08404850283;IL12A|18.8958825829;FADD|3.50642288526;TRAF6|0.213158722942;SIKE1|0.289172045976;TRIM25|14.3204011348;AZI2|2.82842712475;ATG12|7.7274906314;DDX3X|0.283220971324	9	70	1047	7057	http://www.kegg.jp/kegg-bin/show_pathway?hsa04622/hsa:9641%09red/hsa:3592%09red/hsa:8772%09red/hsa:7189%09blue/hsa:80143%09blue/hsa:7706%09red/hsa:64343%09red/hsa:9140%09red/hsa:1654%09blue
alpha-Linolenic acid metabolism	hsa00592	7.40E-01	1.00E+00	PLA2G4E|0.00209330754402;PLA2G2F|0.00135264596495;PLB1|3.31727818326	3	25	1047	7057	http://www.kegg.jp/kegg-bin/show_pathway?hsa00592/hsa:123745%09blue/hsa:64600%09blue/hsa:151056%09red
Bacterial invasion of epithelial cells	hsa05100	7.40E-01	1.00E+00	SHC3|0.353553390593;WASF1|0.157126671815;ELMO1|5.09824250928;SRC|0.493116352247;CBLB|0.285190928967;GAB1|0.320856474391;CBLC|3.53081198516;ELMO2|0.473028823363;SEPT1|97.0058602567;CLTC|0.38156480224	10	78	1047	7057	http://www.kegg.jp/kegg-bin/show_pathway?hsa05100/hsa:53358%09blue/hsa:8936%09blue/hsa:9844%09red/hsa:6714%09blue/hsa:868%09blue/hsa:2549%09blue/hsa:23624%09red/hsa:63916%09blue/hsa:1731%09red/hsa:1213%09blue
Nitrogen metabolism	hsa00910	7.42E-01	1.00E+00	CA6|0.0009765625;CA9|2.12874036491	2	17	1047	7057	http://www.kegg.jp/kegg-bin/show_pathway?hsa00910/hsa:765%09blue/hsa:768%09red
Malaria	hsa05144	7.55E-01	1.00E+00	CSF3|0.00680117627575;CR1|0.219151430329;IL12A|18.8958825829;LRP1|5.42641730979;TGFB3|4.92457765338;THBS1|0.31864015683	6	49	1047	7057	http://www.kegg.jp/kegg-bin/show_pathway?hsa05144/hsa:1440%09blue/hsa:1378%09blue/hsa:3592%09red/hsa:4035%09red/hsa:7043%09red/hsa:7057%09blue
Longevity regulating pathway	hsa04211	7.57E-01	1.00E+00	CREB3L3|0.00571908474979;KL|0.00166530252298;ADCY4|0.378929141628;IGF1|5.35171021914;FOXO1|2.37841423001;PRKAG2|7.31065160184;RPS6KB2|0.406126198178;ADCY8|3.58010028371;CREB3L4|3.34035167771;ADCY2|0.406126198178;SESN3|0.266092545613;CREB3|2.58470566127	12	94	1047	7057	http://www.kegg.jp/kegg-bin/show_pathway?hsa04211/hsa:84699%09blue/hsa:9365%09blue/hsa:196883%09blue/hsa:3479%09red/hsa:2308%09red/hsa:51422%09red/hsa:6199%09blue/hsa:114%09red/hsa:148327%09red/hsa:108%09blue/hsa:143686%09blue/hsa:10488%09red
Starch and sucrose metabolism	hsa00500	7.62E-01	1.00E+00	UGT1A6|0.0076517210749;GYS2|0.00166530252298;KL|0.00166530252298;UGT1A10|0.0009765625;TREH|26.9086852881;GAA|2.31337636781;UGDH|0.293208737308	7	57	1047	7057	http://www.kegg.jp/kegg-bin/show_pathway?hsa00500/hsa:54578%09blue/hsa:2998%09blue/hsa:9365%09blue/hsa:54575%09blue/hsa:11181%09red/hsa:2548%09red/hsa:7358%09blue
Glycosphingolipid biosynthesis - lacto and neolacto series	hsa00601	7.64E-01	1.00E+00	GCNT2|0.444421340583;FUT2|2.73208051351;B4GALT3|4.3469394501	3	26	1047	7057	http://www.kegg.jp/kegg-bin/show_pathway?hsa00601/hsa:2651%09blue/hsa:2524%09red/hsa:8703%09red
Glucagon signaling pathway	hsa04922	7.65E-01	1.00E+00	PFKFB1|0.00344805857926;GYS2|0.00166530252298;CREB3L3|0.00571908474979;FOXO1|2.37841423001;PRKAG2|7.31065160184;ITPR2|0.327598350965;PHKA2|0.373712312159;CREB3L4|3.34035167771;PPARA|2.4966610978;PPP3CB|0.228457862557;ADCY2|0.406126198178;PPP4R3B|0.222210670292;CREB3|2.58470566127	13	102	1047	7057	http://www.kegg.jp/kegg-bin/show_pathway?hsa04922/hsa:5207%09blue/hsa:2998%09blue/hsa:84699%09blue/hsa:2308%09red/hsa:51422%09red/hsa:3709%09blue/hsa:5256%09blue/hsa:148327%09red/hsa:5465%09red/hsa:5532%09blue/hsa:108%09blue/hsa:57223%09blue/hsa:10488%09red
Shigellosis	hsa05131	7.68E-01	1.00E+00	WASF1|0.157126671815;PFN4|16.0;ELMO1|5.09824250928;SRC|0.493116352247;BTRC|0.403320879611;RIPK2|0.291183396617;ELMO2|0.473028823363;ROCK2|0.267943365634	8	65	1047	7057	http://www.kegg.jp/kegg-bin/show_pathway?hsa05131/hsa:8936%09blue/hsa:375189%09red/hsa:9844%09red/hsa:6714%09blue/hsa:8945%09blue/hsa:8767%09blue/hsa:63916%09blue/hsa:9475%09blue
Other glycan degradation	hsa00511	7.71E-01	1.00E+00	MAN2B2|4.95883079976;GBA2|5.50216727256	2	18	1047	7057	http://www.kegg.jp/kegg-bin/show_pathway?hsa00511/hsa:23324%09red/hsa:57704%09red
Metabolism of xenobiotics by cytochrome P450	hsa00980	7.75E-01	1.00E+00	UGT1A6|0.0076517210749;ALDH3A1|0.0016085762056;CYP1A1|0.00548611279585;UGT1A10|0.0009765625;CYP1A2|1024;ADH7|0.00604517575602;GSTO2|13.1774562763;MGST2|18.37917368;GSTA4|0.31425334363	9	73	1047	7057	http://www.kegg.jp/kegg-bin/show_pathway?hsa00980/hsa:54578%09blue/hsa:218%09blue/hsa:1543%09blue/hsa:54575%09blue/hsa:1544%09red/hsa:131%09blue/hsa:119391%09red/hsa:4258%09red/hsa:2941%09blue
Gap junction	hsa04540	7.76E-01	1.00E+00	PRKCB|0.00177249835023;ADCY4|0.378929141628;TUBB1|59.7141114584;SRC|0.493116352247;HTR2B|233.940851259;ITPR2|0.327598350965;ADCY8|3.58010028371;PDGFC|0.267943365634;SOS2|0.291183396617;ADCY2|0.406126198178;MAP2K1|3.03143313302	11	88	1047	7057	http://www.kegg.jp/kegg-bin/show_pathway?hsa04540/hsa:5579%09blue/hsa:196883%09blue/hsa:81027%09red/hsa:6714%09blue/hsa:3357%09red/hsa:3709%09blue/hsa:114%09red/hsa:56034%09blue/hsa:6655%09blue/hsa:108%09blue/hsa:5604%09red
Prion diseases	hsa05020	7.84E-01	1.00E+00	C1QB|0.0009765625;C8A|70.0347968807;EGR1|0.160428237195;MAP2K1|3.03143313302	4	35	1047	7057	http://www.kegg.jp/kegg-bin/show_pathway?hsa05020/hsa:713%09blue/hsa:731%09red/hsa:1958%09blue/hsa:5604%09red
Sulfur metabolism	hsa00920	8.00E-01	1.00E+00	PAPSS2|4.19886673449	1	10	1047	7057	http://www.kegg.jp/kegg-bin/show_pathway?hsa00920/hsa:9060%09red
Synthesis and degradation of ketone bodies	hsa00072	8.00E-01	1.00E+00	ACAT2|2.31337636781	1	10	1047	7057	http://www.kegg.jp/kegg-bin/show_pathway?hsa00072/hsa:39%09red
Sulfur relay system	hsa04122	8.00E-01	1.00E+00	MOCS2|0.336808394216	1	10	1047	7057	http://www.kegg.jp/kegg-bin/show_pathway?hsa04122/hsa:4338%09blue
Parkinson's disease	hsa05012	8.01E-01	1.00E+00	SLC6A3|9.12610972695;SLC18A1|10.1964850186;NDUFA4L2|10.8528346196;NDUFC2|0.0009765625;PRKN|2.60268371088;SNCA|3.29436406907;NDUFA6|2.46228882669;UBA7|8.22491061325;LRRK2|0.341510064189;UBE2J1|0.435275281648;APAF1|0.25881623096;CASP3|0.233258247884;UCHL1|0.201660439806;NDUFB11|2.29739670999;NDUFB5|0.0774817312462;SDHC|0.192109397661;SLC18A2|150.122873502;COX6C|0.070805242831	18	142	1047	7057	http://www.kegg.jp/kegg-bin/show_pathway?hsa05012/hsa:6531%09red/hsa:6570%09red/hsa:56901%09red/hsa:4718%09blue/hsa:5071%09red/hsa:6622%09red/hsa:4700%09red/hsa:7318%09red/hsa:120892%09blue/hsa:51465%09blue/hsa:317%09blue/hsa:836%09blue/hsa:7345%09blue/hsa:54539%09red/hsa:4711%09blue/hsa:6391%09blue/hsa:6571%09red/hsa:1345%09blue
Proteasome	hsa03050	8.02E-01	1.00E+00	PSMB8|0.00218220144155;PSMA8|90.5096679919;PSMD1|0.351111218934;PSMA1|0.255253031427;PSME2|2.92817139189	5	44	1047	7057	http://www.kegg.jp/kegg-bin/show_pathway?hsa03050/hsa:5696%09blue/hsa:143471%09red/hsa:5707%09blue/hsa:5682%09blue/hsa:5721%09red
Endometrial cancer	hsa05213	8.04E-01	1.00E+00	AXIN2|0.279321784518;SOS2|0.291183396617;APC2|46.5271205542;MAP2K1|3.03143313302;LEF1|0.371130892657;BAD|3.89061978965	6	52	1047	7057	http://www.kegg.jp/kegg-bin/show_pathway?hsa05213/hsa:8313%09blue/hsa:6655%09blue/hsa:10297%09red/hsa:5604%09red/hsa:51176%09blue/hsa:572%09red
Alcoholism	hsa05034	8.05E-01	1.00E+00	CREB3L3|0.00571908474979;DDC|0.00436440288309;SLC6A3|9.12610972695;GRIN2C|4.59479341999;SLC18A1|10.1964850186;GRIN2D|7.361501205;SHC3|0.353553390593;PPP1R1B|0.238159499511;GNAO1|4.3469394501;GRIN3B|17.3877578004;GNG13|1024;CREB3L4|3.34035167771;SOS2|0.291183396617;HDAC9|0.295248165357;GNG3|45.8865679365;MAP2K1|3.03143313302;GNG10|0.148650889375;HAT1|0.297301778751;SLC18A2|150.122873502;CREB3|2.58…	23	179	1047	7057	http://www.kegg.jp/kegg-bin/show_pathway?hsa05034/hsa:84699%09blue/hsa:1644%09blue/hsa:6531%09red/hsa:2905%09red/hsa:6570%09red/hsa:2906%09red/hsa:53358%09blue/hsa:84152%09blue/hsa:2775%09red/hsa:116444%09red/hsa:51764%09red/hsa:148327%09red/hsa:6655%09blue/hsa:9734%09blue/hsa:2785%09red/hsa:5604%09red/hsa:2790%09blue/hsa:8520%09blue/hsa:6571%09red/hsa:10488%09red/hsa:3017%09blue/hsa:5500%09blue/…
Phosphatidylinositol signaling system	hsa04070	8.06E-01	1.00E+00	PRKCB|0.00177249835023;PLCG2|0.417543959714;PLCD4|11.6317801386;IPPK|3.09512998708;PIK3C2G|0.273573425315;OCRL|0.38958228983;ITPR2|0.327598350965;PIP5K1A|0.432268615654;DGKD|4.3469394501;PIK3C2A|0.305660069423;MTMR4|0.447512535464;PPIP5K2|0.17800627445	12	98	1047	7057	http://www.kegg.jp/kegg-bin/show_pathway?hsa04070/hsa:5579%09blue/hsa:5336%09blue/hsa:84812%09red/hsa:64768%09red/hsa:5288%09blue/hsa:4952%09blue/hsa:3709%09blue/hsa:8394%09blue/hsa:8527%09red/hsa:5286%09blue/hsa:9110%09blue/hsa:23262%09blue
Long-term depression	hsa04730	8.07E-01	1.00E+00	PLA2G4E|0.00209330754402;PRKCB|0.00177249835023;IGF1|5.35171021914;GNAO1|4.3469394501;GRIA3|0.295248165357;ITPR2|0.327598350965;MAP2K1|3.03143313302	7	60	1047	7057	http://www.kegg.jp/kegg-bin/show_pathway?hsa04730/hsa:123745%09blue/hsa:5579%09blue/hsa:3479%09red/hsa:2775%09red/hsa:2892%09blue/hsa:3709%09blue/hsa:5604%09red
Epithelial cell signaling in Helicobacter pylori infection	hsa05120	8.10E-01	1.00E+00	ATP6V1G3|0.0009765625;PLCG2|0.417543959714;CSK|0.26425451014;SRC|0.493116352247;ATP6V1G2|3.89061978965;ATP6V0A4|16.4498212265;CASP3|0.233258247884;ATP6V1C2|326.287520594	8	68	1047	7057	http://www.kegg.jp/kegg-bin/show_pathway?hsa05120/hsa:127124%09blue/hsa:5336%09blue/hsa:1445%09blue/hsa:6714%09blue/hsa:534%09red/hsa:50617%09red/hsa:836%09blue/hsa:245973%09red
Toll-like receptor signaling pathway	hsa04620	8.11E-01	1.00E+00	CCL4|0.00118573719179;IKBKE|4.08404850283;CD86|35.5062231062;CD14|9.38267959386;IL12A|18.8958825829;CD80|109.896375864;IRF5|31.1249583172;FADD|3.50642288526;TRAF6|0.213158722942;FOS|0.151774360549;TAB2|0.329876977693;MAP2K1|3.03143313302;TLR5|57.2816045394	13	106	1047	7057	http://www.kegg.jp/kegg-bin/show_pathway?hsa04620/hsa:388372%09blue/hsa:9641%09red/hsa:942%09red/hsa:929%09red/hsa:3592%09red/hsa:941%09red/hsa:3663%09red/hsa:8772%09red/hsa:7189%09blue/hsa:2353%09blue/hsa:23118%09blue/hsa:5604%09red/hsa:7100%09red
Cysteine and methionine metabolism	hsa00270	8.18E-01	1.00E+00	DNMT3B|0.466516495768;CTH|0.185565446329;AMD1|0.346277367028;DNMT1|0.450625231305;MDH1|0.269807059126	5	45	1047	7057	http://www.kegg.jp/kegg-bin/show_pathway?hsa00270/hsa:1789%09blue/hsa:1491%09blue/hsa:262%09blue/hsa:1786%09blue/hsa:4190%09blue
One carbon pool by folate	hsa00670	8.20E-01	1.00E+00	MTHFD2|0.25881623096;ATIC|0.360982298881	2	20	1047	7057	http://www.kegg.jp/kegg-bin/show_pathway?hsa00670/hsa:10797%09blue/hsa:471%09blue
Steroid biosynthesis	hsa00100	8.20E-01	1.00E+00	FAXDC2|2.4966610978;SOAT1|0.275476278969	2	20	1047	7057	http://www.kegg.jp/kegg-bin/show_pathway?hsa00100/hsa:10826%09red/hsa:6646%09blue
Primary immunodeficiency	hsa05340	8.20E-01	1.00E+00	CD4|10.7778686149;ZAP70|18.7653591877;AIRE|27.8576180255;BLNK|5.06302637588	4	37	1047	7057	http://www.kegg.jp/kegg-bin/show_pathway?hsa05340/hsa:920%09red/hsa:7535%09red/hsa:326%09red/hsa:29760%09red
mRNA surveillance pathway	hsa03015	8.23E-01	1.00E+00	PABPC1L|4.16986304336;PPP2R2A|0.343885454535;SRRM1|0.273573425315;PPP2R5E|0.231647015473;SSU72|3.63007662127;MAGOHB|0.371130892657;WDR82|0.426317445884;PAPOLA|0.334481888697;PPP2R5D|6.32033049491;PABPC1|0.386891248386;PPP1CB|0.216134307827	11	92	1047	7057	http://www.kegg.jp/kegg-bin/show_pathway?hsa03015/hsa:80336%09red/hsa:5520%09blue/hsa:10250%09blue/hsa:5529%09blue/hsa:29101%09red/hsa:55110%09blue/hsa:80335%09blue/hsa:10914%09blue/hsa:5528%09red/hsa:26986%09blue/hsa:5500%09blue
Pentose phosphate pathway	hsa00030	8.26E-01	1.00E+00	ALDOB|0.0009765625;TKTL2|0.426317445884;DERA|0.38958228983	3	29	1047	7057	http://www.kegg.jp/kegg-bin/show_pathway?hsa00030/hsa:229%09blue/hsa:84076%09blue/hsa:51071%09blue
Hippo signaling pathway -multiple species	hsa04392	8.26E-01	1.00E+00	MOB1B|0.171942727267;LATS1|0.329876977693;YAP1|0.307786103336	3	29	1047	7057	http://www.kegg.jp/kegg-bin/show_pathway?hsa04392/hsa:92597%09blue/hsa:9113%09blue/hsa:10413%09blue
Drug metabolism - other enzymes	hsa00983	8.33E-01	1.00E+00	UGT1A6|0.0076517210749;UGT1A10|0.0009765625;UPP2|1024;TPMT|0.266092545613;IMPDH1|2.98969849727	5	46	1047	7057	http://www.kegg.jp/kegg-bin/show_pathway?hsa00983/hsa:54578%09blue/hsa:54575%09blue/hsa:151531%09red/hsa:7172%09blue/hsa:3614%09red
Alzheimer's disease	hsa05010	8.34E-01	1.00E+00	GRIN2C|4.59479341999;CACNA1F|16.0;GRIN2D|7.361501205;ATP2A1|12.2950014503;NDUFA4L2|10.8528346196;NDUFC2|0.0009765625;FADD|3.50642288526;SNCA|3.29436406907;ITPR2|0.327598350965;NDUFA6|2.46228882669;APH1B|0.400534938795;LRP1|5.42641730979;PPP3CB|0.228457862557;APAF1|0.25881623096;CASP3|0.233258247884;BACE1|10.3388226451;NDUFB11|2.29739670999;BAD|3.89061978965;NDUFB5|0.0774817312462;SDHC|0.192109397…	21	168	1047	7057	http://www.kegg.jp/kegg-bin/show_pathway?hsa05010/hsa:2905%09red/hsa:778%09red/hsa:2906%09red/hsa:487%09red/hsa:56901%09red/hsa:4718%09blue/hsa:8772%09red/hsa:6622%09red/hsa:3709%09blue/hsa:4700%09red/hsa:83464%09blue/hsa:4035%09red/hsa:5532%09blue/hsa:317%09blue/hsa:836%09blue/hsa:23621%09red/hsa:54539%09red/hsa:572%09red/hsa:4711%09blue/hsa:6391%09blue/hsa:1345%09blue
Cardiac muscle contraction	hsa04260	8.38E-01	1.00E+00	ATP1B4|0.00198038960896;CACNG5|0.0009765625;CACNA1F|16.0;MYL3|0.0009765625;MYH7|4.65893434587;MYH6|17.7531115531;CACNB2|3.89061978965;ATP1B3|0.271683715632;COX6C|0.070805242831	9	78	1047	7057	http://www.kegg.jp/kegg-bin/show_pathway?hsa04260/hsa:23439%09blue/hsa:27091%09blue/hsa:778%09red/hsa:4634%09blue/hsa:4625%09red/hsa:4624%09red/hsa:783%09red/hsa:483%09blue/hsa:1345%09blue
Citrate cycle (TCA cycle)	hsa00020	8.44E-01	1.00E+00	ACO1|0.429282718219;SDHC|0.192109397661;MDH1|0.269807059126	3	30	1047	7057	http://www.kegg.jp/kegg-bin/show_pathway?hsa00020/hsa:48%09blue/hsa:6391%09blue/hsa:4190%09blue
Allograft rejection	hsa05330	8.51E-01	1.00E+00	CD86|35.5062231062;IL12A|18.8958825829;PRF1|31.778959854;CD80|109.896375864	4	39	1047	7057	http://www.kegg.jp/kegg-bin/show_pathway?hsa05330/hsa:942%09red/hsa:3592%09red/hsa:5551%09red/hsa:941%09red
Hepatitis C	hsa05160	8.52E-01	1.00E+00	IKBKE|4.08404850283;CLDN9|27.2843165366;SCARB1|0.429282718219;RNASEL|4.50023393876;CLDN6|0.320856474391;OCLN|0.36349312933;TRAF6|0.213158722942;EIF2AK2|0.140632310586;PPP2R2A|0.343885454535;SOS2|0.291183396617;PPARA|2.4966610978;CLDN20|17.3877578004;BAD|3.89061978965;NR1H3|2.96904714126;CLDN22|471.13607712;CLDN1|0.25881623096	16	133	1047	7057	http://www.kegg.jp/kegg-bin/show_pathway?hsa05160/hsa:9641%09red/hsa:9080%09red/hsa:949%09blue/hsa:6041%09red/hsa:9074%09blue/hsa:100506658%09blue/hsa:7189%09blue/hsa:5610%09blue/hsa:5520%09blue/hsa:6655%09blue/hsa:5465%09red/hsa:49861%09red/hsa:572%09red/hsa:10062%09red/hsa:53842%09red/hsa:9076%09blue
HIF-1 signaling pathway	hsa04066	8.56E-01	1.00E+00	PRKCB|0.00177249835023;PLCG2|0.417543959714;NOS3|2.67585510957;IGF1|5.35171021914;RPS6KB2|0.406126198178;ENO3|2.07052984768;BCL2|0.196146024474;ANGPT2|3.7842305869;MAP2K1|3.03143313302;TFRC|0.26061644021;NOX1|809.002303348;PDK1|0.287174588749	12	103	1047	7057	http://www.kegg.jp/kegg-bin/show_pathway?hsa04066/hsa:5579%09blue/hsa:5336%09blue/hsa:4846%09red/hsa:3479%09red/hsa:6199%09blue/hsa:2027%09red/hsa:596%09blue/hsa:285%09red/hsa:5604%09red/hsa:7037%09blue/hsa:27035%09red/hsa:5163%09blue
Cytosolic DNA-sensing pathway	hsa04623	8.57E-01	1.00E+00	CCL4|0.00118573719179;IKBKE|4.08404850283;ZBP1|2.82842712475;TREX1|3.60500185044;PYCARD|7.6741129546;MB21D1|0.420448207627;POLR3C|4.02782220023	7	64	1047	7057	http://www.kegg.jp/kegg-bin/show_pathway?hsa04623/hsa:388372%09blue/hsa:9641%09red/hsa:81030%09red/hsa:11277%09red/hsa:29108%09red/hsa:115004%09blue/hsa:10623%09red
Longevity regulating pathway - multiple species	hsa04213	8.57E-01	1.00E+00	ADCY4|0.378929141628;IGF1|5.35171021914;FOXO1|2.37841423001;PRKAG2|7.31065160184;RPS6KB2|0.406126198178;ADCY8|3.58010028371;ADCY2|0.406126198178	7	64	1047	7057	http://www.kegg.jp/kegg-bin/show_pathway?hsa04213/hsa:196883%09blue/hsa:3479%09red/hsa:2308%09red/hsa:51422%09red/hsa:6199%09blue/hsa:114%09red/hsa:108%09blue
Other types of O-glycan biosynthesis	hsa00514	8.59E-01	1.00E+00	POFUT1|0.423372656181;B4GALT3|4.3469394501;OGT|0.291183396617	3	31	1047	7057	http://www.kegg.jp/kegg-bin/show_pathway?hsa00514/hsa:23509%09blue/hsa:8703%09red/hsa:8473%09blue
Notch signaling pathway	hsa04330	8.60E-01	1.00E+00	PTCRA|13.269112733;NOTCH4|5.97939699454;APH1B|0.400534938795;NUMB|10.5560632862;NOTCH2|0.453759577659	5	48	1047	7057	http://www.kegg.jp/kegg-bin/show_pathway?hsa04330/hsa:171558%09red/hsa:4855%09red/hsa:83464%09blue/hsa:8650%09red/hsa:4853%09blue
Valine, leucine and isoleucine degradation	hsa00280	8.60E-01	1.00E+00	EHHADH|0.174342958294;DBT|0.279321784518;ALDH2|2.21913894414;ALDH7A1|2.18858740252;ACAT2|2.31337636781	5	48	1047	7057	http://www.kegg.jp/kegg-bin/show_pathway?hsa00280/hsa:1962%09blue/hsa:1629%09blue/hsa:217%09red/hsa:501%09red/hsa:39%09red
Nucleotide excision repair	hsa03420	8.60E-01	1.00E+00	ERCC8|0.120742041116;RFC1|0.307786103336;RPA1|0.426317445884;CCNH|4.25748072981;PCNA|0.122427537198	5	48	1047	7057	http://www.kegg.jp/kegg-bin/show_pathway?hsa03420/hsa:1161%09blue/hsa:5981%09blue/hsa:6117%09blue/hsa:902%09red/hsa:5111%09blue
Toxoplasmosis	hsa05145	8.62E-01	1.00E+00	IL12A|18.8958825829;ALOX5|12.1257325321;GNAO1|4.3469394501;TRAF6|0.213158722942;LAMB3|3.45814892523;BCL2|0.196146024474;TAB2|0.329876977693;BIRC3|0.309926924985;BCL2L1|0.463294030945;CASP3|0.233258247884;LAMA3|10.1260527518;TGFB3|4.92457765338;LAMC2|3.81055199218;BAD|3.89061978965	14	119	1047	7057	http://www.kegg.jp/kegg-bin/show_pathway?hsa05145/hsa:3592%09red/hsa:240%09red/hsa:2775%09red/hsa:7189%09blue/hsa:3914%09red/hsa:596%09blue/hsa:23118%09blue/hsa:330%09blue/hsa:598%09blue/hsa:836%09blue/hsa:3909%09red/hsa:7043%09red/hsa:3918%09red/hsa:572%09red
Glioma	hsa05214	8.68E-01	1.00E+00	PRKCB|0.00177249835023;CDKN2A|0.00335377123608;PLCG2|0.417543959714;IGF1|5.35171021914;SHC3|0.353553390593;SOS2|0.291183396617;MAP2K1|3.03143313302	7	65	1047	7057	http://www.kegg.jp/kegg-bin/show_pathway?hsa05214/hsa:5579%09blue/hsa:1029%09blue/hsa:5336%09blue/hsa:3479%09red/hsa:53358%09blue/hsa:6655%09blue/hsa:5604%09red
Propanoate metabolism	hsa00640	8.74E-01	1.00E+00	EHHADH|0.174342958294;DBT|0.279321784518;ACAT2|2.31337636781	3	32	1047	7057	http://www.kegg.jp/kegg-bin/show_pathway?hsa00640/hsa:1962%09blue/hsa:1629%09blue/hsa:39%09red
RNA polymerase	hsa03020	8.74E-01	1.00E+00	TWISTNB|7.21000370089;POLR3C|4.02782220023;POLR2B|3.73213196615	3	32	1047	7057	http://www.kegg.jp/kegg-bin/show_pathway?hsa03020/hsa:221830%09red/hsa:10623%09red/hsa:5431%09red
Fatty acid biosynthesis	hsa00061	8.76E-01	1.00E+00	OXSM|0.351111218934	1	13	1047	7057	http://www.kegg.jp/kegg-bin/show_pathway?hsa00061/hsa:54995%09blue
Non-homologous end-joining	hsa03450	8.76E-01	1.00E+00	MRE11|0.327598350965	1	13	1047	7057	http://www.kegg.jp/kegg-bin/show_pathway?hsa03450/hsa:4361%09blue
Adherens junction	hsa04520	8.77E-01	1.00E+00	RAC2|6.68070335543;WASF1|0.157126671815;SORBS1|0.486327473706;FARP2|3.63007662127;SRC|0.493116352247;TGFBR1|0.210224103813;LEF1|0.371130892657;CSNK2B|2.42838976879	8	74	1047	7057	http://www.kegg.jp/kegg-bin/show_pathway?hsa04520/hsa:5880%09red/hsa:8936%09blue/hsa:10580%09blue/hsa:9855%09red/hsa:6714%09blue/hsa:7046%09blue/hsa:51176%09blue/hsa:1460%09red
Chemical carcinogenesis	hsa05204	8.77E-01	1.00E+00	UGT1A6|0.0076517210749;ALDH3A1|0.0016085762056;CYP1A1|0.00548611279585;UGT1A10|0.0009765625;CYP1A2|1024;ADH7|0.00604517575602;GSTO2|13.1774562763;MGST2|18.37917368;GSTA4|0.31425334363	9	82	1047	7057	http://www.kegg.jp/kegg-bin/show_pathway?hsa05204/hsa:54578%09blue/hsa:218%09blue/hsa:1543%09blue/hsa:54575%09blue/hsa:1544%09red/hsa:131%09blue/hsa:119391%09red/hsa:4258%09red/hsa:2941%09blue
Pancreatic cancer	hsa05212	8.78E-01	1.00E+00	CDKN2A|0.00335377123608;RAC2|6.68070335543;BCL2L1|0.463294030945;TGFB3|4.92457765338;MAP2K1|3.03143313302;TGFBR1|0.210224103813;BAD|3.89061978965	7	66	1047	7057	http://www.kegg.jp/kegg-bin/show_pathway?hsa05212/hsa:1029%09blue/hsa:5880%09red/hsa:598%09blue/hsa:7043%09red/hsa:5604%09red/hsa:7046%09blue/hsa:572%09red
Glycolysis / Gluconeogenesis	hsa00010	8.87E-01	1.00E+00	ALDH3A1|0.0016085762056;ALDOB|0.0009765625;ADH7|0.00604517575602;ENO3|2.07052984768;ALDH2|2.21913894414;GAPDHS|315.172969816;ALDH7A1|2.18858740252	7	67	1047	7057	http://www.kegg.jp/kegg-bin/show_pathway?hsa00010/hsa:218%09blue/hsa:229%09blue/hsa:131%09blue/hsa:2027%09red/hsa:217%09red/hsa:26330%09red/hsa:501%09red
Porphyrin and chlorophyll metabolism	hsa00860	8.89E-01	1.00E+00	UGT1A6|0.0076517210749;UGT1A10|0.0009765625;HEPH|0.269807059126;CP|837.531707963	4	42	1047	7057	http://www.kegg.jp/kegg-bin/show_pathway?hsa00860/hsa:54578%09blue/hsa:54575%09blue/hsa:9843%09blue/hsa:1356%09red
Vibrio cholerae infection	hsa05110	8.93E-01	1.00E+00	ATP6V1G3|0.0009765625;PLCG2|0.417543959714;ATP6V1G2|3.89061978965;ATP6V0A4|16.4498212265;ATP6V1C2|326.287520594	5	51	1047	7057	http://www.kegg.jp/kegg-bin/show_pathway?hsa05110/hsa:127124%09blue/hsa:5336%09blue/hsa:534%09red/hsa:50617%09red/hsa:245973%09red
HTLV-I infection	hsa05166	8.93E-01	1.00E+00	IL2RB|0.00340058813788;IL1R2|0.00202200180438;CDKN2A|0.00335377123608;IL15|0.0009765625;ADCY4|0.378929141628;NFATC1|0.0009765625;EGR1|0.160428237195;IL15RA|8.0;WNT8B|28.4429657973;FOSL1|66.7178086938;FZD9|23.5883074767;MYBL1|0.192109397661;WNT2B|12.9960383417;WNT10B|0.271683715632;FOS|0.151774360549;ADCY8|3.58010028371;MAP3K3|2.0;ATR|0.266092545613;MYBL2|0.463294030945;PPP3CB|0.228457862557;BCL2L…	32	259	1047	7057	http://www.kegg.jp/kegg-bin/show_pathway?hsa05166/hsa:3560%09blue/hsa:7850%09blue/hsa:1029%09blue/hsa:3600%09blue/hsa:196883%09blue/hsa:4772%09blue/hsa:1958%09blue/hsa:3601%09red/hsa:7479%09red/hsa:8061%09red/hsa:8326%09red/hsa:4603%09blue/hsa:7482%09red/hsa:7480%09blue/hsa:2353%09blue/hsa:114%09red/hsa:4215%09red/hsa:545%09blue/hsa:4605%09blue/hsa:5532%09blue/hsa:598%09blue/hsa:10297%09red/hsa:9…
Folate biosynthesis	hsa00790	8.95E-01	1.00E+00	MOCS2|0.336808394216	1	14	1047	7057	http://www.kegg.jp/kegg-bin/show_pathway?hsa00790/hsa:4338%09blue
Insulin signaling pathway	hsa04910	8.95E-01	1.00E+00	GYS2|0.00166530252298;PPP1R3A|21.2589730255;SHC3|0.353553390593;SORBS1|0.486327473706;FOXO1|2.37841423001;PRKAG2|7.31065160184;PPP1R3D|0.339151081862;RPS6KB2|0.406126198178;CBLB|0.285190928967;CBLC|3.53081198516;PHKA2|0.373712312159;LIPE|5.77571678209;SOS2|0.291183396617;MAP2K1|3.03143313302;BAD|3.89061978965;PPP1CB|0.216134307827	16	139	1047	7057	http://www.kegg.jp/kegg-bin/show_pathway?hsa04910/hsa:2998%09blue/hsa:5506%09red/hsa:53358%09blue/hsa:10580%09blue/hsa:2308%09red/hsa:51422%09red/hsa:5509%09blue/hsa:6199%09blue/hsa:868%09blue/hsa:23624%09red/hsa:5256%09blue/hsa:3991%09red/hsa:6655%09blue/hsa:5604%09red/hsa:572%09red/hsa:5500%09blue
Phagosome	hsa04145	8.99E-01	1.00E+00	DKFZp686L24211|0.00988872339039;FCAR|1024;COLEC11|3.22656703689;ATP6V1G3|0.0009765625;CD14|9.38267959386;RILP|2.46228882669;SCARB1|0.429282718219;NCF2|9.44794129144;NCF1|6.8685234915;TUBB1|59.7141114584;ATP6V1G2|3.89061978965;FCGR1A|91.773135873;ATP6V0A4|16.4498212265;EEA1|0.301451956923;THBS1|0.31864015683;TFRC|0.26061644021;NOX1|809.002303348;ATP6V1C2|326.287520594	18	155	1047	7057	http://www.kegg.jp/kegg-bin/show_pathway?hsa04145/hsa:64581%09blue/hsa:2204%09red/hsa:78989%09red/hsa:127124%09blue/hsa:929%09red/hsa:83547%09red/hsa:949%09blue/hsa:4688%09red/hsa:653361%09red/hsa:81027%09red/hsa:534%09red/hsa:2209%09red/hsa:50617%09red/hsa:8411%09blue/hsa:7057%09blue/hsa:7037%09blue/hsa:27035%09red/hsa:245973%09red
SNARE interactions in vesicular transport	hsa04130	8.99E-01	1.00E+00	STX1A|0.293208737308;STX19|38.5858504861;VAMP1|41.6429393741	3	34	1047	7057	http://www.kegg.jp/kegg-bin/show_pathway?hsa04130/hsa:6804%09blue/hsa:415117%09red/hsa:6843%09red
Fatty acid elongation	hsa00062	9.04E-01	1.00E+00	ELOVL3|0.00230662629185;ACOT4|8.57418770029	2	25	1047	7057	http://www.kegg.jp/kegg-bin/show_pathway?hsa00062/hsa:83401%09blue/hsa:122970%09red
Tuberculosis	hsa05152	9.05E-01	1.00E+00	DKFZp686L24211|0.00988872339039;IRAK2|0.0009765625;CR1|0.219151430329;CD14|9.38267959386;IL12A|18.8958825829;SPHK1|11.6317801386;FADD|3.50642288526;SRC|0.493116352247;TRAF6|0.213158722942;FCGR1A|91.773135873;RIPK2|0.291183396617;ATP6V0A4|16.4498212265;BCL2|0.196146024474;PPP3CB|0.228457862557;EEA1|0.301451956923;APAF1|0.25881623096;CASP3|0.233258247884;TGFB3|4.92457765338;ARHGEF12|0.327598350965;…	21	179	1047	7057	http://www.kegg.jp/kegg-bin/show_pathway?hsa05152/hsa:64581%09blue/hsa:3656%09blue/hsa:1378%09blue/hsa:929%09red/hsa:3592%09red/hsa:8877%09red/hsa:8772%09red/hsa:6714%09blue/hsa:7189%09blue/hsa:2209%09red/hsa:8767%09blue/hsa:50617%09red/hsa:596%09blue/hsa:5532%09blue/hsa:8411%09blue/hsa:317%09blue/hsa:836%09blue/hsa:7043%09red/hsa:23365%09blue/hsa:572%09red/hsa:3329%09blue
Alanine, aspartate and glutamate metabolism	hsa00250	9.09E-01	1.00E+00	DDO|0.0049443616952;ASPA|0.0009765625;GPT|8.69387890021	3	35	1047	7057	http://www.kegg.jp/kegg-bin/show_pathway?hsa00250/hsa:8528%09blue/hsa:443%09blue/hsa:2875%09red
Spliceosome	hsa03040	9.11E-01	1.00E+00	PLRG1|0.116629123942;SF3A2|0.482968164462;CHERP|2.69446715373;USP39|2.08493152168;SNRNP40|0.327598350965;PRPF8|0.397768241877;TRA2A|0.31864015683;MAGOHB|0.371130892657;PQBP1|3.81055199218;HNRNPA3|0.238159499511;RBMX|0.312082637225;SNRPE|0.194791144915;SRSF6|0.368567304323;SF3B1|0.285190928967;HNRNPA1|0.351111218934	15	134	1047	7057	http://www.kegg.jp/kegg-bin/show_pathway?hsa03040/hsa:5356%09blue/hsa:8175%09blue/hsa:10523%09red/hsa:10713%09red/hsa:9410%09blue/hsa:10594%09blue/hsa:29896%09blue/hsa:55110%09blue/hsa:10084%09red/hsa:220988%09blue/hsa:27316%09blue/hsa:6635%09blue/hsa:6431%09blue/hsa:23451%09blue/hsa:3178%09blue
Protein processing in endoplasmic reticulum	hsa04141	9.16E-01	1.00E+00	SEL1L2|6.91629785046;PRKN|2.60268371088;SYVN1|4.19886673449;FBXO2|11.2355590059;EIF2AK2|0.140632310586;BCL2|0.196146024474;DERL3|3.89061978965;SEC24B|0.38958228983;NGLY1|0.397768241877;UBE2J1|0.435275281648;UBE2D4|10.928322054;SVIP|14.4200074018;MOGS|2.63901582155;MARCH6|0.307786103336;HSPH1|0.38156480224;FBXO6|6.45313407378;NFE2L2|3.07375036258;STUB1|6.72717132203;HSP90AA1|0.336808394216	19	166	1047	7057	http://www.kegg.jp/kegg-bin/show_pathway?hsa04141/hsa:80343%09red/hsa:5071%09red/hsa:84447%09red/hsa:26232%09red/hsa:5610%09blue/hsa:596%09blue/hsa:91319%09red/hsa:10427%09blue/hsa:55768%09blue/hsa:51465%09blue/hsa:51619%09red/hsa:258010%09red/hsa:7841%09red/hsa:10299%09blue/hsa:10808%09blue/hsa:26270%09red/hsa:4780%09red/hsa:10273%09red/hsa:3320%09blue
Natural killer cell mediated cytotoxicity	hsa04650	9.16E-01	1.00E+00	CD48|0.00180974230838;PRKCB|0.00177249835023;TNFRSF10B|0.00161976473792;RAC2|6.68070335543;PLCG2|0.417543959714;NFATC1|0.0009765625;ZAP70|18.7653591877;TYROBP|3.8637453157;PRF1|31.778959854;SHC3|0.353553390593;SOS2|0.291183396617;HCST|27.8576180255;PPP3CB|0.228457862557;CASP3|0.233258247884;MAP2K1|3.03143313302	15	135	1047	7057	http://www.kegg.jp/kegg-bin/show_pathway?hsa04650/hsa:962%09blue/hsa:5579%09blue/hsa:8795%09blue/hsa:5880%09red/hsa:5336%09blue/hsa:4772%09blue/hsa:7535%09red/hsa:7305%09red/hsa:5551%09red/hsa:53358%09blue/hsa:6655%09blue/hsa:10870%09red/hsa:5532%09blue/hsa:836%09blue/hsa:5604%09red
T cell receptor signaling pathway	hsa04660	9.26E-01	1.00E+00	CD4|10.7778686149;NFATC1|0.0009765625;ZAP70|18.7653591877;ITK|44.6317973232;CBLB|0.285190928967;FOS|0.151774360549;CBLC|3.53081198516;SOS2|0.291183396617;PPP3CB|0.228457862557;RASGRP1|95.0095085203;MAP2K1|3.03143313302	11	105	1047	7057	http://www.kegg.jp/kegg-bin/show_pathway?hsa04660/hsa:920%09red/hsa:4772%09blue/hsa:7535%09red/hsa:3702%09red/hsa:868%09blue/hsa:2353%09blue/hsa:23624%09red/hsa:6655%09blue/hsa:5532%09blue/hsa:10125%09red/hsa:5604%09red
Huntington's disease	hsa05016	9.33E-01	1.00E+00	CREB3L3|0.00571908474979;DNAI2|0.00255936211691;DNAH3|6.32033049491;DNAH6|0.201660439806;NDUFA4L2|10.8528346196;NDUFC2|0.0009765625;REST|0.163799175482;RCOR1|0.277392368017;DNAH9|6.14750072515;NDUFA6|2.46228882669;CREB3L4|3.34035167771;DNAH11|11.1579493308;APAF1|0.25881623096;CASP3|0.233258247884;TFAM|0.164938488847;NDUFB11|2.29739670999;NDUFB5|0.0774817312462;SDHC|0.192109397661;POLR2B|3.7321319…	22	193	1047	7057	http://www.kegg.jp/kegg-bin/show_pathway?hsa05016/hsa:84699%09blue/hsa:64446%09blue/hsa:55567%09red/hsa:1768%09blue/hsa:56901%09red/hsa:4718%09blue/hsa:5978%09blue/hsa:23186%09blue/hsa:1770%09red/hsa:4700%09red/hsa:148327%09red/hsa:8701%09red/hsa:317%09blue/hsa:836%09blue/hsa:7019%09blue/hsa:54539%09red/hsa:4711%09blue/hsa:6391%09blue/hsa:5431%09red/hsa:10488%09red/hsa:1213%09blue/hsa:1345%09blue
Regulation of lipolysis in adipocytes	hsa04923	9.33E-01	1.00E+00	ADCY4|0.378929141628;ABHD5|0.312082637225;ADCY8|3.58010028371;LIPE|5.77571678209;ADCY2|0.406126198178	5	56	1047	7057	http://www.kegg.jp/kegg-bin/show_pathway?hsa04923/hsa:196883%09blue/hsa:51099%09blue/hsa:114%09red/hsa:3991%09red/hsa:108%09blue
Acute myeloid leukemia	hsa05221	9.40E-01	1.00E+00	RPS6KB2|0.406126198178;SOS2|0.291183396617;MAP2K1|3.03143313302;LEF1|0.371130892657;BAD|3.89061978965	5	57	1047	7057	http://www.kegg.jp/kegg-bin/show_pathway?hsa05221/hsa:6199%09blue/hsa:6655%09blue/hsa:5604%09red/hsa:51176%09blue/hsa:572%09red
Peroxisome	hsa04146	9.40E-01	1.00E+00	DDO|0.0049443616952;PIPOX|0.00436440288309;EHHADH|0.174342958294;PEX1|0.301451956923;HACL1|0.332171453524;PEX11B|0.323088207659;PEX12|12.6406609898;ACOT8|2.75108363628	8	83	1047	7057	http://www.kegg.jp/kegg-bin/show_pathway?hsa04146/hsa:8528%09blue/hsa:51268%09blue/hsa:1962%09blue/hsa:5189%09blue/hsa:26061%09blue/hsa:8799%09blue/hsa:5193%09red/hsa:10005%09red
Renal cell carcinoma	hsa05211	9.46E-01	1.00E+00	ARNT2|0.236514411681;GAB1|0.320856474391;SOS2|0.291183396617;RAP1A|0.31864015683;TGFB3|4.92457765338;MAP2K1|3.03143313302	6	67	1047	7057	http://www.kegg.jp/kegg-bin/show_pathway?hsa05211/hsa:9915%09blue/hsa:2549%09blue/hsa:6655%09blue/hsa:5906%09blue/hsa:7043%09red/hsa:5604%09red
FoxO signaling pathway	hsa04068	9.47E-01	1.00E+00	GABARAP|0.00193963378015;IGF1|5.35171021914;FOXO1|2.37841423001;PRKAG2|7.31065160184;CCNB3|0.231647015473;SOS2|0.291183396617;GADD45B|4.89056111077;TGFB3|4.92457765338;SKP2|0.351111218934;MAP2K1|3.03143313302;TGFBR1|0.210224103813;CCND2|0.466516495768;PLK2|0.204475514639;ATG12|7.7274906314	14	134	1047	7057	http://www.kegg.jp/kegg-bin/show_pathway?hsa04068/hsa:11337%09blue/hsa:3479%09red/hsa:2308%09red/hsa:51422%09red/hsa:85417%09blue/hsa:6655%09blue/hsa:4616%09red/hsa:7043%09red/hsa:6502%09blue/hsa:5604%09red/hsa:7046%09blue/hsa:894%09blue/hsa:10769%09blue/hsa:9140%09red
mTOR signaling pathway	hsa04150	9.55E-01	1.00E+00	PRKCB|0.00177249835023;IGF1|5.35171021914;RPS6KB2|0.406126198178;RICTOR|0.275476278969;RRAGC|0.309926924985	5	60	1047	7057	http://www.kegg.jp/kegg-bin/show_pathway?hsa04150/hsa:5579%09blue/hsa:3479%09red/hsa:6199%09blue/hsa:253260%09blue/hsa:64121%09blue
Galactose metabolism	hsa00052	9.56E-01	1.00E+00	LCT|7.46426393229;GAA|2.31337636781	2	31	1047	7057	http://www.kegg.jp/kegg-bin/show_pathway?hsa00052/hsa:3938%09red/hsa:2548%09red
Chagas disease (American trypanosomiasis)	hsa05142	9.57E-01	1.00E+00	C1QB|0.0009765625;IL12A|18.8958825829;GNA14|23.9175879782;FADD|3.50642288526;GNAO1|4.3469394501;TRAF6|0.213158722942;FOS|0.151774360549;PPP2R2A|0.343885454535;TGFB3|4.92457765338;TGFBR1|0.210224103813	10	104	1047	7057	http://www.kegg.jp/kegg-bin/show_pathway?hsa05142/hsa:713%09blue/hsa:3592%09red/hsa:9630%09red/hsa:8772%09red/hsa:2775%09red/hsa:7189%09blue/hsa:2353%09blue/hsa:5520%09blue/hsa:7043%09red/hsa:7046%09blue
Carbon metabolism	hsa01200	9.59E-01	1.00E+00	ALDOB|0.0009765625;TKTL2|0.426317445884;ME1|0.16154410383;EHHADH|0.174342958294;ENO3|2.07052984768;GPT|8.69387890021;ACO1|0.429282718219;SDHC|0.192109397661;ESD|0.222210670292;MDH1|0.269807059126;ACAT2|2.31337636781	11	113	1047	7057	http://www.kegg.jp/kegg-bin/show_pathway?hsa01200/hsa:229%09blue/hsa:84076%09blue/hsa:4199%09blue/hsa:1962%09blue/hsa:2027%09red/hsa:2875%09red/hsa:48%09blue/hsa:6391%09blue/hsa:2098%09blue/hsa:4190%09blue/hsa:39%09red
Graft-versus-host disease	hsa05332	9.60E-01	1.00E+00	CD86|35.5062231062;PRF1|31.778959854;CD80|109.896375864	3	42	1047	7057	http://www.kegg.jp/kegg-bin/show_pathway?hsa05332/hsa:942%09red/hsa:5551%09red/hsa:941%09red
Base excision repair	hsa03410	9.67E-01	1.00E+00	NEIL1|4.92457765338;PCNA|0.122427537198	2	33	1047	7057	http://www.kegg.jp/kegg-bin/show_pathway?hsa03410/hsa:79661%09red/hsa:5111%09blue
Fructose and mannose metabolism	hsa00051	9.67E-01	1.00E+00	PFKFB1|0.00344805857926;ALDOB|0.0009765625	2	33	1047	7057	http://www.kegg.jp/kegg-bin/show_pathway?hsa00051/hsa:5207%09blue/hsa:229%09blue
Oxidative phosphorylation	hsa00190	9.68E-01	1.00E+00	ATP12A|14.6213032037;ATP4A|0.00118573719179;ATP6V1G3|0.0009765625;NDUFA4L2|10.8528346196;NDUFC2|0.0009765625;ATP6V1G2|3.89061978965;NDUFA6|2.46228882669;ATP6V0A4|16.4498212265;NDUFB11|2.29739670999;NDUFB5|0.0774817312462;ATP6V1C2|326.287520594;SDHC|0.192109397661;COX6C|0.070805242831	13	133	1047	7057	http://www.kegg.jp/kegg-bin/show_pathway?hsa00190/hsa:479%09red/hsa:495%09blue/hsa:127124%09blue/hsa:56901%09red/hsa:4718%09blue/hsa:534%09red/hsa:4700%09red/hsa:50617%09red/hsa:54539%09red/hsa:4711%09blue/hsa:245973%09red/hsa:6391%09blue/hsa:1345%09blue
Metabolic pathways	hsa01100	9.71E-01	1.00E+00	UGT1A6|0.0076517210749;GAL3ST1|0.00243814560332;ST6GALNAC1|0.00718896602051;ALOX15B|10.8528346196;PLA2G4E|0.00209330754402;AK9|5.54043787244;ALDH3A1|0.0016085762056;PIPOX|0.00436440288309;PLA2G2F|0.00135264596495;CYP1A1|0.00548611279585;UROC1|3.22656703689;PAH|0.00744248435972;AMPD1|0.00272410872334;HYAL4|8.81524092701;DDC|0.00436440288309;KL|0.00166530252298;RDH12|0.00133402368824;ALDOB|0.000976…	163	1239	1047	7057	http://www.kegg.jp/kegg-bin/show_pathway?hsa01100/hsa:54578%09blue/hsa:9514%09blue/hsa:55808%09blue/hsa:247%09red/hsa:123745%09blue/hsa:221264%09red/hsa:218%09blue/hsa:51268%09blue/hsa:64600%09blue/hsa:1543%09blue/hsa:131669%09red/hsa:5053%09blue/hsa:270%09blue/hsa:23553%09red/hsa:1644%09blue/hsa:9365%09blue/hsa:145226%09blue/hsa:229%09blue/hsa:138429%09red/hsa:1757%09red/hsa:54575%09blue/hsa:162…
Basal transcription factors	hsa03022	9.72E-01	1.00E+00	GTF2A1|0.255253031427;TAF6L|4.56305486347;CCNH|4.25748072981	3	45	1047	7057	http://www.kegg.jp/kegg-bin/show_pathway?hsa03022/hsa:2957%09blue/hsa:10629%09red/hsa:902%09red
African trypanosomiasis	hsa05143	9.75E-01	1.00E+00	PRKCB|0.00177249835023;IL12A|18.8958825829	2	35	1047	7057	http://www.kegg.jp/kegg-bin/show_pathway?hsa05143/hsa:5579%09blue/hsa:3592%09red
Biosynthesis of unsaturated fatty acids	hsa01040	9.75E-01	1.00E+00	ACOT4|8.57418770029	1	23	1047	7057	http://www.kegg.jp/kegg-bin/show_pathway?hsa01040/hsa:122970%09red
Aminoacyl-tRNA biosynthesis	hsa00970	9.76E-01	1.00E+00	PARS2|0.420448207627;PSTK|3.7842305869;TARS2|0.479632059663;HARS|2.0;LARS|0.305660069423	5	66	1047	7057	http://www.kegg.jp/kegg-bin/show_pathway?hsa00970/hsa:25973%09blue/hsa:118672%09red/hsa:80222%09blue/hsa:3035%09red/hsa:51520%09blue
Sphingolipid signaling pathway	hsa04071	9.78E-01	1.00E+00	PRKCB|0.00177249835023;RAC2|6.68070335543;SPHK1|11.6317801386;NOS3|2.67585510957;SMPD1|2.25011696938;BCL2|0.196146024474;PPP2R2A|0.343885454535;ROCK2|0.267943365634;PPP2R5E|0.231647015473;MAP2K1|3.03143313302;PPP2R5D|6.32033049491	11	121	1047	7057	http://www.kegg.jp/kegg-bin/show_pathway?hsa04071/hsa:5579%09blue/hsa:5880%09red/hsa:8877%09red/hsa:4846%09red/hsa:6609%09red/hsa:596%09blue/hsa:5520%09blue/hsa:9475%09blue/hsa:5529%09blue/hsa:5604%09red/hsa:5528%09red
Fc epsilon RI signaling pathway	hsa04664	9.81E-01	1.00E+00	PLA2G4E|0.00209330754402;RAC2|6.68070335543;PLCG2|0.417543959714;SOS2|0.291183396617;MAP2K1|3.03143313302	5	68	1047	7057	http://www.kegg.jp/kegg-bin/show_pathway?hsa04664/hsa:123745%09blue/hsa:5880%09red/hsa:5336%09blue/hsa:6655%09blue/hsa:5604%09red
Fatty acid metabolism	hsa01212	9.81E-01	1.00E+00	OXSM|0.351111218934;EHHADH|0.174342958294;ACAT2|2.31337636781	3	48	1047	7057	http://www.kegg.jp/kegg-bin/show_pathway?hsa01212/hsa:54995%09blue/hsa:1962%09blue/hsa:39%09red
Antigen processing and presentation	hsa04612	9.82E-01	1.00E+00	B2M|0.00155378219483;CD4|10.7778686149;TAPBP|11.4716419841;HSPA4|0.348685916588;PSME2|2.92817139189;HSP90AA1|0.336808394216	6	78	1047	7057	http://www.kegg.jp/kegg-bin/show_pathway?hsa04612/hsa:567%09blue/hsa:920%09red/hsa:6892%09red/hsa:3308%09blue/hsa:5721%09red/hsa:3320%09blue
Epstein-Barr virus infection	hsa05169	9.88E-01	1.00E+00	PLCG2|0.417543959714;FGR|2.67585510957;CD38|6.23331663728;NUP214|0.38156480224;HSPB2|2.62078680772;TRAF6|0.213158722942;ENTPD8|178.527189293;EIF2AK2|0.140632310586;BCL2|0.196146024474;TAB2|0.329876977693;AKAP8L|0.486327473706;ENTPD3|5.27803164309;PSMD1|0.351111218934;SKP2|0.351111218934;CSNK2B|2.42838976879;POLR3C|4.02782220023;POLR2B|3.73213196615;XPO1|0.179244406002;YWHAQ|0.289172045976;RAN|0.2…	20	204	1047	7057	http://www.kegg.jp/kegg-bin/show_pathway?hsa05169/hsa:5336%09blue/hsa:2268%09red/hsa:952%09red/hsa:8021%09blue/hsa:3316%09red/hsa:7189%09blue/hsa:377841%09red/hsa:5610%09blue/hsa:596%09blue/hsa:23118%09blue/hsa:26993%09blue/hsa:956%09red/hsa:5707%09blue/hsa:6502%09blue/hsa:1460%09red/hsa:10623%09red/hsa:5431%09red/hsa:7514%09blue/hsa:10971%09blue/hsa:5901%09blue
Ribosome	hsa03010	9.89E-01	1.00E+00	MRPL11|0.246558176123;MRPL18|0.25881623096;MRPL13|0.241484082231;MRPL2|4.16986304336;RPL26L1|0.293208737308;RPL22L1|0.243163736853;MRPS18C|3.70635224756;RPS25|0.279321784518;RPL38|0.210224103813;RPS13|0.154963462492;RPL39|0.153893051668;RPS27A|0.157126671815	12	138	1047	7057	http://www.kegg.jp/kegg-bin/show_pathway?hsa03010/hsa:65003%09blue/hsa:29074%09blue/hsa:28998%09blue/hsa:51069%09red/hsa:51121%09blue/hsa:200916%09blue/hsa:51023%09red/hsa:6230%09blue/hsa:6169%09blue/hsa:6207%09blue/hsa:6170%09blue/hsa:6233%09blue
Autoimmune thyroid disease	hsa05320	9.91E-01	1.00E+00	CD86|35.5062231062;PRF1|31.778959854;CD80|109.896375864	3	54	1047	7057	http://www.kegg.jp/kegg-bin/show_pathway?hsa05320/hsa:942%09red/hsa:5551%09red/hsa:941%09red
Non-alcoholic fatty liver disease (NAFLD)	hsa04932	9.93E-01	1.00E+00	LEP|0.00675419711959;NDUFA4L2|10.8528346196;NDUFC2|0.0009765625;PRKAG2|7.31065160184;NDUFA6|2.46228882669;PPARA|2.4966610978;CASP3|0.233258247884;ITCH|0.287174588749;NDUFB11|2.29739670999;NR1H3|2.96904714126;NDUFB5|0.0774817312462;SDHC|0.192109397661;COX6C|0.070805242831	13	151	1047	7057	http://www.kegg.jp/kegg-bin/show_pathway?hsa04932/hsa:3952%09blue/hsa:56901%09red/hsa:4718%09blue/hsa:51422%09red/hsa:4700%09red/hsa:5465%09red/hsa:836%09blue/hsa:83737%09blue/hsa:54539%09red/hsa:10062%09red/hsa:4711%09blue/hsa:6391%09blue/hsa:1345%09blue
Herpes simplex infection	hsa05168	9.93E-01	1.00E+00	IL15|0.0009765625;PILRA|4.37717480504;IKBKE|4.08404850283;IL12A|18.8958825829;RNASEL|4.50023393876;FADD|3.50642288526;TRAF6|0.213158722942;FOS|0.151774360549;EIF2AK2|0.140632310586;TAB2|0.329876977693;CLOCK|0.253489869948;CASP3|0.233258247884;SKP2|0.351111218934;TAF6L|4.56305486347;CSNK2B|2.42838976879;PPP1CB|0.216134307827;SRSF6|0.368567304323	17	186	1047	7057	http://www.kegg.jp/kegg-bin/show_pathway?hsa05168/hsa:3600%09blue/hsa:29992%09red/hsa:9641%09red/hsa:3592%09red/hsa:6041%09red/hsa:8772%09red/hsa:7189%09blue/hsa:2353%09blue/hsa:5610%09blue/hsa:23118%09blue/hsa:9575%09blue/hsa:836%09blue/hsa:6502%09blue/hsa:10629%09red/hsa:1460%09red/hsa:5500%09blue/hsa:6431%09blue
Central carbon metabolism in cancer	hsa05230	9.93E-01	1.00E+00	NTRK1|2.82842712475;MAP2K1|3.03143313302;SCO2|3.13833639159;PDK1|0.287174588749	4	67	1047	7057	http://www.kegg.jp/kegg-bin/show_pathway?hsa05230/hsa:4914%09red/hsa:5604%09red/hsa:9997%09red/hsa:5163%09blue
Measles	hsa05162	9.94E-01	1.00E+00	IL2RB|0.00340058813788;TNFRSF10B|0.00161976473792;IKBKE|4.08404850283;IL12A|18.8958825829;CCNE1|0.0877778047336;CBLB|0.285190928967;TRAF6|0.213158722942;EIF2AK2|0.140632310586;TAB2|0.329876977693;CCND2|0.466516495768;CSNK2B|2.42838976879	11	136	1047	7057	http://www.kegg.jp/kegg-bin/show_pathway?hsa05162/hsa:3560%09blue/hsa:8795%09blue/hsa:9641%09red/hsa:3592%09red/hsa:898%09blue/hsa:868%09blue/hsa:7189%09blue/hsa:5610%09blue/hsa:23118%09blue/hsa:894%09blue/hsa:1460%09red
Asthma	hsa05310	9.94E-01	1.00E+00	CCL11|0.0009765625	1	32	1047	7057	http://www.kegg.jp/kegg-bin/show_pathway?hsa05310/hsa:6356%09blue
Adipocytokine signaling pathway	hsa04920	9.95E-01	1.00E+00	LEP|0.00675419711959;PRKAG2|7.31065160184;PPARA|2.4966610978;RXRG|0.18049114944	4	70	1047	7057	http://www.kegg.jp/kegg-bin/show_pathway?hsa04920/hsa:3952%09blue/hsa:51422%09red/hsa:5465%09red/hsa:6258%09blue
Type II diabetes mellitus	hsa04930	9.96E-01	1.00E+00	KCNJ11|4.95883079976;CACNA1G|0.453759577659	2	48	1047	7057	http://www.kegg.jp/kegg-bin/show_pathway?hsa04930/hsa:3767%09red/hsa:8913%09blue
Amino sugar and nucleotide sugar metabolism	hsa00520	9.96E-01	1.00E+00	PGM3|2.62078680772;UGDH|0.293208737308	2	48	1047	7057	http://www.kegg.jp/kegg-bin/show_pathway?hsa00520/hsa:5238%09red/hsa:7358%09blue
Viral carcinogenesis	hsa05203	9.98E-01	1.00E+00	CCR3|0.00537321022711;CREB3L3|0.00571908474979;CDKN2A|0.00335377123608;CCNE1|0.0877778047336;SRC|0.493116352247;CREB3L4|3.34035167771;EIF2AK2|0.140632310586;GTF2A1|0.255253031427;HDAC9|0.295248165357;CASP3|0.233258247884;SKP2|0.351111218934;BAD|3.89061978965;CCND2|0.466516495768;CREB3|2.58470566127;HIST1H2BD|0.241484082231;DDX3X|0.283220971324;YWHAQ|0.289172045976	17	205	1047	7057	http://www.kegg.jp/kegg-bin/show_pathway?hsa05203/hsa:1232%09blue/hsa:84699%09blue/hsa:1029%09blue/hsa:898%09blue/hsa:6714%09blue/hsa:148327%09red/hsa:5610%09blue/hsa:2957%09blue/hsa:9734%09blue/hsa:836%09blue/hsa:6502%09blue/hsa:572%09red/hsa:894%09blue/hsa:10488%09red/hsa:3017%09blue/hsa:1654%09blue/hsa:10971%09blue
Systemic lupus erythematosus	hsa05322	9.99E-01	1.00E+00	C1QB|0.0009765625;C2|8.57418770029;CD86|35.5062231062;C8A|70.0347968807;CD80|109.896375864;FCGR1A|91.773135873;ELANE|192.671583669;HIST1H2BD|0.241484082231;H2AFZ|0.0679209289079	9	136	1047	7057	http://www.kegg.jp/kegg-bin/show_pathway?hsa05322/hsa:713%09blue/hsa:717%09red/hsa:942%09red/hsa:731%09red/hsa:941%09red/hsa:2209%09red/hsa:1991%09red/hsa:3017%09blue/hsa:3015%09blue
Influenza A	hsa05164	1.00E+00	1.00E+00	PRKCB|0.00177249835023;TNFRSF10B|0.00161976473792;TMPRSS2|0.00108356393757;IKBKE|4.08404850283;IL12A|18.8958825829;RNASEL|4.50023393876;PYCARD|7.6741129546;EIF2AK2|0.140632310586;TRIM25|14.3204011348;MAP2K1|3.03143313302;XPO1|0.179244406002	11	176	1047	7057	http://www.kegg.jp/kegg-bin/show_pathway?hsa05164/hsa:5579%09blue/hsa:8795%09blue/hsa:7113%09blue/hsa:9641%09red/hsa:3592%09red/hsa:6041%09red/hsa:29108%09red/hsa:5610%09blue/hsa:7706%09red/hsa:5604%09red/hsa:7514%09blue
MicroRNAs in cancer	hsa05206	1.00E+00	1.00E+00	PRKCB|0.00177249835023;CDKN2A|0.00335377123608;PLCG2|0.417543959714;TNR|16.912288649;CCNE1|0.0877778047336;DNMT3B|0.466516495768;NOTCH4|5.97939699454;ZFPM2|0.371130892657;BRCA1|0.163799175482;BCL2|0.196146024474;SOS2|0.291183396617;IGF2BP1|0.32533546386;MDM4|0.253489869948;APC2|46.5271205542;FSCN1|0.466516495768;FZD3|0.26061644021;CASP3|0.233258247884;SPRY2|0.285190928967;THBS1|0.31864015683;MAP2…	23	297	1047	7057	http://www.kegg.jp/kegg-bin/show_pathway?hsa05206/hsa:5579%09blue/hsa:1029%09blue/hsa:5336%09blue/hsa:7143%09red/hsa:898%09blue/hsa:1789%09blue/hsa:4855%09red/hsa:23414%09blue/hsa:672%09blue/hsa:596%09blue/hsa:6655%09blue/hsa:10642%09blue/hsa:4194%09blue/hsa:10297%09red/hsa:6624%09blue/hsa:7976%09blue/hsa:836%09blue/hsa:10253%09blue/hsa:7057%09blue/hsa:5604%09red/hsa:4853%09blue/hsa:894%09blue/hs…
Olfactory transduction	hsa04740	1.00E+00	1.00E+00	PDE1A|0.00749425093223;CNGA3|1024;SLC8A2|0.299369676155;SLC8A3|2.14354692507;GNG13|1024;ARRB1|0.476318999022	6	420	1047	7057	http://www.kegg.jp/kegg-bin/show_pathway?hsa04740/hsa:5136%09blue/hsa:1261%09red/hsa:6543%09blue/hsa:6547%09red/hsa:51764%09red/hsa:408%09blue
