# Supplementary material for: Integrated Analysis of LncRNA-mRNA Coexpression in the Extracellular Matrix of Developing Deciduous Teeth in Miniature Pigs
Source: Biomed Res Int. 2019 Jan 23;2019:6159490. doi: 10.1155/2019/6159490 (PMC6364112; doi:10.1155/2019/6159490)
Supplement: Supplementary Materials — Supplementary Table 1: the identified differentially expressed genes during the deciduous tooth germ transition from the cap stage to bell stage (E40 to E50) (XLS 100 kb). Supplementary Table 2: the identified differentially expressed genes during the deciduous tooth germ transition from the early bell stage to late bell stage (E50 to E60) (XLS 71kb). Supplementary Table 3: the identified differentially expressed lncRNAs during the deciduous tooth germ transition from the cap stage to the early bell stage (E40 to E50) (XLS 211kb). Supplementary Table 4: the identified differentially expressed lncRNAs during the deciduous tooth germ transition from the early bell stage to the late bell stage (E50 to E60) (XLS 626 kb). Supplementary Table 5: the significantly enriched KEGG pathways associated with the grouped DEGs (XLS 169kb). Supplementary Table 6: the expression changes of the ECM pathway genes from E40 to E50 and from E50 to E60 (XLS 11kb). Supplementary Table 7: the miRNA-target lncRNA and mRNA regulatory interactions of the ECM pathway (XLS 27kb). Supplementary Table 8: lncRNA and mRNA colocation analysis of the ECM pathway genes (XLS 30kb). Supplementary Figures: the developmental morphology of tooth germs at key development stages E40, E50, and E60 (Supplementary Figure 1). The coexpressed analysis of ECM genes and lncRNAs (Supplementary Figure 2) (DOCX 15mb). [file 6159490.f1.zip › Supplementary materials/Supplementary Table 6.xls]

## Sheet: E50VS E40
GENE OF ECM	FC	LOG2FC
VTN	302.334	8.24
TNXB	0.307786	-1.7
LAMB4	0.348686	-1.52
GP1BA	0.0259162	-5.27
TNR	0.0231957	-5.43
GP5	0.198884	-2.33
COL4A4	7.83536	2.97
THBS4	0.339151	-1.56
ITGB7	0.0349152	-4.84
SV2A	0.148651	-2.75
THBS3	0.309927	-1.69
ITGA8	4.28709	2.1
ITGB8	2.39496	1.26
CHAD	0.0106722	-6.55
LAMC3	4.53154	2.18
CD47	2.88786	1.53
ITGA1	3.5801	1.84
ITGA9	2.37841	1.25
HMMR	3.70635	1.89
LAMA2	2.58471	1.37
COL6A3	2.05623	1.04
GP9	0.0275845	-5.18
LAMA4	2.60268	1.38
ITGA4	7.06162	2.82
ITGAV	2.77022	1.47
ITGB1	2.31338	1.21
COL1A2	3.16017	1.66

## Sheet: E60VSE50
GENE OF ECM	FC	LOG2FC
VTN	0.0033076	-8.24
COL6A6	0.00298097	-8.39
GP1BA	28.443	4.83
TNR	16.9123	4.08
COL4A4	0.423373	-1.24
COL4A6	0.176777	-2.5
ITGB7	15.1369	3.92
SV2A	5.6962	2.51
ITGA3	0.432269	-1.21
ITGB8	0.15932	-2.65
LAMB3	3.45815	1.79
CHAD	60.5477	5.92
IBSP	2.09943	1.07
COL4A5	0.246558	-2.02
ITGA9	0.320856	-1.64
HMMR	0.257028	-1.96
COL6A2	0.5	-1
COL6A3	0.420448	-1.25
LAMA3	10.1261	3.34
GP9	36.0019	5.17
THBS1	0.31864	-1.65
LAMC2	3.81055	1.93
COL4A1	0.435275	-1.2
COL1A1	3.34035	1.74
